# Supplementary material for: Identifying metabolic features of colorectal cancer liability using Mendelian randomization
Source: medRxiv preprint, doi:10.1101/2023.03.10.23287084, version 4 (2023-11-09)
Supplement: Supplementary File 1 [file 287084_file18.xlsx]

## Sheet: Supplementary File 1a
Supplementary File 1a: Genetic variants used to construct genetic risk scores reflecting colorectal cancer liability
Scores were generated using PLINK 1.9 (command line ‘plink --bfile data --score /path/filename --out /path/filename’)
rsID	Associated genes	EA	OA	Beta	SE	P-value	EAF	Exposure
rs72647484	WNT4, CDC42	T	C	0.0504	0.0159	0.0015	0.9107	Colorectal cancer
rs4360494	SF3A3	G	C	0.0523	0.0089	3.8e-09	0.4539	Colorectal cancer
rs12144319		C	T	0.0665	0.01	3.3e-11	0.2548	Colorectal cancer
rs6678517	LAMC1	A	G	0.073	0.0089	2.4e-16	0.5898	Colorectal cancer
rs17011141	DUSP10	G	A	0.0877	0.0108	6.1e-16	0.2087	Colorectal cancer
rs11692435	FAM178B, FAHD2B, ANKRD36, COX5B, ACTR1B, ZAP70, TMEM131	G	A	0.1133	0.0179	1.22e-08	0.9	Colorectal cancer
rs448513		C	T	0.0511	0.0093	4.4e-08	0.326	Colorectal cancer
rs11884596	SATB2	C	T	0.0535	0.0092	5e-09	0.3823	Colorectal cancer
rs3731861	PNKD, TMBIM1	T	C	0.0613	0.0091	1.5e-11	0.6295	Colorectal cancer
rs35470271	CTNNB1	G	A	0.0994	0.012	1.2e-16	0.154	Colorectal cancer
rs9831861		G	T	0.0677	0.0094	4.17e-10	0.59	Colorectal cancer
rs6781752	LRIG1	A	G	0.0597	0.0111	7.1e-08	0.205	Colorectal cancer
rs12635946		C	T	0.077	0.0094	1.02e-11	0.62	Colorectal cancer
rs10049390		A	G	0.0597	0.0101	3.8e-09	0.7353	Colorectal cancer
rs9876206	TERC, MYNN	C	T	0.0453	0.0101	7.8e-06	0.7507	Colorectal cancer
rs13149359	ATOH1, SMARCAD1, BMPR1B	A	C	0.052	0.0091	1.2e-08	0.3663	Colorectal cancer
rs1391441	TET2	A	G	0.0522	0.0092	1.6e-08	0.672	Colorectal cancer
rs11727676	HHIP, ANAPC10, ABCE1, OTUD4	C	T	0.0842	0.0152	2.9e-08	0.098	Colorectal cancer
rs78368589	TERT, CLPTM1L	T	C	0.1119	0.0191	5.1e-09	0.0597	Colorectal cancer
rs7708610	LINC00603, PTGER4	A	G	0.0545	0.0093	4.2e-09	0.3564	Colorectal cancer
rs4976270	PITX1, H2AFY	C	T	0.0693	0.0088	4.8e-15	0.5501	Colorectal cancer
rs2070699		T	G	0.0677	0.0094	3.88e-09	0.48	Colorectal cancer
rs3131043	IER3, DDR1	G	A	0.0677	0.0141	2.67e-08	0.43	Colorectal cancer
rs16878812	FKBP5, TEAD3	A	G	0.0778	0.0141	3.6e-08	0.8861	Colorectal cancer
rs62404966	BMP5	C	T	0.0724	0.0107	1.1e-11	0.7623	Colorectal cancer
rs6928864		C	A	0.1222	0.0264	1.37e-08	0.91	Colorectal cancer
rs12672022		T	C	0.065	0.0119	4.7e-08	0.8345	Colorectal cancer
rs10951878		C	T	0.0583	0.0142	1.1e-08	0.49	Colorectal cancer
rs16892766	EIF3H	C	A	0.2099	0.0192	7.3e-28	0.0829	Colorectal cancer
rs6983267	MYC, POU5F1B, CCAT2, LOC101930033, SRRM1P1, POU5F1B, ACTC1xNR	G	T	0.1052	0.0131	1.1e-15	0.5228	Colorectal cancer
rs1537372	CDKN2B-AS1	G	T	0.0504	0.0089	1.4e-08	0.5692	Colorectal cancer
rs34405347		T	G	0.0818	0.0148	3.1e-08	0.9034	Colorectal cancer
rs10980628		C	T	0.0637	0.0107	2.8e-09	0.2106	Colorectal cancer
rs11255841	LOC338591, GATA3, VTI1A	T	A	0.1064	0.0102	1.3e-25	0.703	Colorectal cancer
rs10821907	A1CF, PRKG1	C	T	0.073	0.0117	5e-10	0.8276	Colorectal cancer
rs704017	ZMIZ1-AS1, ZMIZ1, POLR3A, LOC283050	G	A	0.0765	0.009	1.8e-17	0.5846	Colorectal cancer
rs11190164	ENTPD7, COX15, CUTC, ABCC2, SLC25A28, NKX2-3, SnoU13, CNNM1, WNT8B	G	A	0.0889	0.0104	1e-17	0.2626	Colorectal cancer
rs12246635		C	T	0.0975	0.0144	1.3e-11	0.0983	Colorectal cancer
rs4450168		C	A	0.0953	0.0137	1.24e-08	0.17	Colorectal cancer
rs174533	MYRF, FEN1, FADS1, TMEM258, FEN1, FADS2, FADS3	G	A	0.0636	0.0094	1.2e-11	0.6739	Colorectal cancer
rs7121958	POLD3	G	T	0.078	0.0088	8.9e-19	0.5105	Colorectal cancer
rs61389091	POLD3	C	T	0.1934	0.0237	3.7e-16	0.9606	Colorectal cancer
rs2186607		T	A	0.0537	0.0088	1.1e-09	0.5178	Colorectal cancer
rs35808169	CCND2	C	T	0.089	0.0117	3.6e-14	0.1721	Colorectal cancer
rs2250430	CD9	T	A	0.0597	0.0101	4.1e-09	0.7095	Colorectal cancer
rs11610543	PRICKLE1	G	A	0.053	0.0087	1.3e-09	0.5013	Colorectal cancer
rs4759277	LRP1	A	C	0.053	0.0092	9.4e-09	0.3546	Colorectal cancer
rs597808	ATXN2, SH2B3, BRAP	G	A	0.0737	0.009	2.6e-16	0.5166	Colorectal cancer
rs7333607	NRxNR	G	A	0.0758	0.0105	6.3e-13	0.235	Colorectal cancer
rs78341008		C	T	0.0982	0.0177	2.6e-08	0.0719	Colorectal cancer
rs1330889		C	T	0.1044	0.0136	6.5e-10	0.87	Colorectal cancer
rs8000189		T	C	0.0549	0.0091	1.8e-09	0.6401	Colorectal cancer
rs35107139	BMP4	C	A	0.0912	0.0091	2.1e-23	0.4235	Colorectal cancer
rs4901473	BMP4	G	A	0.0465	0.0091	3.1e-07	0.378	Colorectal cancer
rs12708491	GREM1	G	A	0.0464	0.0095	1.1e-06	0.5872	Colorectal cancer
rs56324967		C	T	0.0689	0.0094	2.4e-13	0.6757	Colorectal cancer
rs7495132	CRTC3	T	C	0.1044	0.0136	7.92e-10	0.12	Colorectal cancer
rs9924886	CDH1	A	C	0.055	0.0099	3.1e-08	0.7321	Colorectal cancer
rs9930005	MAF, DYNLRB2	C	A	0.0498	0.0089	2.1e-08	0.4303	Colorectal cancer
rs62042090	FOXL1	T	C	0.0481	0.0107	6.6e-06	0.2164	Colorectal cancer
rs4968127	NXN	G	A	0.0514	0.0095	6.8e-08	0.3684	Colorectal cancer
rs983318		A	G	0.0595	0.0102	5.6e-09	0.2526	Colorectal cancer
rs75954926		G	A	0.0882	0.0101	2.6e-18	0.6568	Colorectal cancer
rs11874392	SMAD7	A	T	0.1606	0.0088	3.8e-74	0.545	Colorectal cancer
rs34797592		T	C	0.0868	0.0139	4.2e-10	0.1182	Colorectal cancer
rs28840750	RHPN2, GPATCH1	T	G	0.1939	0.0196	3.7e-23	0.948	Colorectal cancer
rs12979278		T	C	0.0677	0.0094	6.11e-10	0.53	Colorectal cancer
rs73068325		T	C	0.0632	0.0115	4.2e-08	0.1826	Colorectal cancer
rs189583	BMP2	G	C	0.0795	0.0096	1.1e-16	0.3298	Colorectal cancer
rs4813802	BMP2	G	T	0.0819	0.0094	2.3e-18	0.3561	Colorectal cancer
rs6031311		T	C	0.0597	0.0103	6.8e-09	0.7591	Colorectal cancer
rs1741640	LAMA5, RPS21	C	T	0.1146	0.0107	1.1e-26	0.7652	Colorectal cancer
rs17493485		T	C	-0.0806	0.0148	4.93e-08	0.8003	Colon cancer
rs704017	LOC283050, AS1, ZMIZ1, ZMIZ1-AS1, POLR3A	A	G	-0.0791	0.0119	3.36e-11	0.4277	Colon cancer
rs1250569	ZMIZ1	T	C	-0.0656	0.0118	2.83e-08	0.5719	Colon cancer
rs7912704		T	C	-0.0653	0.0115	1.43e-08	0.5043	Colon cancer
rs4084123		A	C	0.0654	0.0116	1.83e-08	0.4129	Colon cancer
rs7116087		T	C	-0.0724	0.0122	3.07e-09	0.6536	Colon cancer
rs174535	MYRF, FADS1, C11orf9, C11orf10, FADS2, FEN1	T	C	0.0681	0.0124	3.69e-08	0.6647	Colon cancer
rs10899009		T	C	0.0774	0.0115	2.05e-11	0.5139	Colon cancer
rs34695217		T	C	0.1853	0.0309	2.02e-09	0.9381	Colon cancer
rs11065822		T	G	-0.0695	0.0123	1.82e-08	0.3578	Colon cancer
rs55990915	NOS1	A	C	0.0978	0.0175	2.49e-08	0.1377	Colon cancer
rs12140498		T	C	0.0832	0.0142	4.54e-09	0.213	Colon cancer
rs10880358		C	G	-0.0627	0.0115	4.92e-08	0.4805	Colon cancer
rs3217810	CCND2	T	C	0.1691	0.0184	4.69e-20	0.1339	Colon cancer
rs7315690		T	C	0.0682	0.0123	3.26e-08	0.324	Colon cancer
rs10161980		C	G	0.0662	0.0121	4.61e-08	0.6271	Colon cancer
rs4444235	BMP4, DDHD1, MIR5580	T	C	-0.0783	0.0116	1.21e-11	0.5159	Colon cancer
rs17094983		A	G	-0.1039	0.0175	2.73e-09	0.1413	Colon cancer
rs80158569		A	G	0.1238	0.0225	3.88e-08	0.0972	Colon cancer
rs12708491	GREM1	A	G	-0.0679	0.0117	6.65e-09	0.3972	Colon cancer
rs12144319		T	C	-0.0737	0.0133	2.77e-08	0.7117	Colon cancer
rs11071933		C	G	0.0727	0.0124	4.12e-09	0.6468	Colon cancer
rs36068942		A	G	0.0887	0.0131	1.49e-11	0.2712	Colon cancer
rs4968126		A	G	0.0709	0.0121	4.31e-09	0.3797	Colon cancer
rs4939821		T	C	-0.0837	0.013	1.05e-10	0.3062	Colon cancer
rs8106006		T	C	-0.1238	0.0224	3.18e-08	0.1466	Colon cancer
rs11699816		T	C	-0.0645	0.0117	3.79e-08	0.5013	Colon cancer
rs6143029		T	C	-0.0808	0.0146	3.3e-08	0.2009	Colon cancer
rs6038431		T	G	0.0693	0.0121	8.97e-09	0.3545	Colon cancer
rs1015563	BMP2	T	C	0.0696	0.012	7.18e-09	0.359	Colon cancer
rs1800734	MLH1	A	G	0.0794	0.0136	5.65e-09	0.2659	Colon cancer
rs75815531		A	T	0.1512	0.0257	3.73e-09	0.0656	Colon cancer
rs10076449		T	C	-0.0728	0.0116	3.86e-10	0.4533	Colon cancer
rs75991160		A	C	-0.0837	0.0126	3.36e-11	0.71	Colon cancer
rs2904600		A	C	0.0795	0.0144	3.22e-08	0.7759	Colon cancer
rs2437844		A	G	0.1276	0.0179	1.07e-12	0.1411	Colon cancer
rs7822864		A	G	0.0881	0.0151	5.12e-09	0.2139	Colon cancer
rs7842552		A	G	-0.1189	0.0126	4.74e-21	0.6975	Colon cancer
rs704017	LOC283050, AS1, ZMIZ1, POLR3A	A	G	-0.1067	0.0151	1.539e-12	0.4259	Proximal colon cancer
rs10774624	SHB3/ATXN2, SH2B3, PTPN11	A	G	0.0944	0.0152	5.031e-10	0.5463	Proximal colon cancer
rs41314284		T	C	0.1334	0.0243	4.166e-08	0.0978	Proximal colon cancer
rs3217810	CCND2	T	C	0.2029	0.0229	8.297e-19	0.1206	Proximal colon cancer
rs1129406		T	C	0.0813	0.0149	4.692e-08	0.3869	Proximal colon cancer
rs4444235	BMP4, DDHD1, MIR5580	T	C	-0.0858	0.0146	4.075e-09	0.5175	Proximal colon cancer
rs80158569		A	G	0.1758	0.0279	3.063e-10	0.0792	Proximal colon cancer
rs12708491	GREM1	A	G	-0.0857	0.0148	7.439e-09	0.3923	Proximal colon cancer
rs2651244	CTH, PTGER3	A	G	-0.082	0.0149	3.443e-08	0.3775	Proximal colon cancer
rs983318		A	G	0.0918	0.0166	3.405e-08	0.2462	Proximal colon cancer
rs6507874	SMAD7	T	C	0.1092	0.0147	1.124e-13	0.5168	Proximal colon cancer
rs1411300		A	G	-0.0887	0.0156	1.17e-08	0.6917	Proximal colon cancer
rs6086193		T	C	0.1001	0.0166	1.503e-09	0.2606	Proximal colon cancer
rs4515003		C	G	0.0812	0.0146	2.676e-08	0.5083	Proximal colon cancer
rs67879518		A	G	-0.113	0.0204	2.844e-08	0.2372	Proximal colon cancer
rs75815531		A	T	0.1826	0.0317	8.71e-09	0.0558	Proximal colon cancer
rs4976270	PITX1, H2AFY	T	C	-0.103	0.0148	3.359e-12	0.4622	Proximal colon cancer
rs16892766	EIF3H	A	C	-0.1451	0.0252	7.942e-09	0.9096	Proximal colon cancer
rs3847136		A	G	0.1476	0.0156	2.499e-21	0.3134	Proximal colon cancer
rs4132699		A	C	-0.0813	0.0148	4.21e-08	0.5969	Proximal colon cancer
rs17578234		T	C	0.1083	0.0191	1.554e-08	0.1994	Distal colon cancer
rs2388748		T	C	-0.0897	0.0156	9.235e-09	0.3826	Distal colon cancer
rs11213801		T	C	-0.1441	0.0166	4.561e-18	0.7068	Distal colon cancer
rs35905518		T	C	0.1531	0.0265	7.28e-09	0.8726	Distal colon cancer
rs1265564	CUX2	A	C	0.0871	0.0154	1.5e-08	0.5698	Distal colon cancer
rs4129271		A	G	0.0938	0.0164	9.631e-09	0.2907	Distal colon cancer
rs11169314		A	T	-0.0932	0.0157	3.041e-09	0.6543	Distal colon cancer
rs35107139	BMP4	A	C	-0.0944	0.0154	9.27e-10	0.5509	Distal colon cancer
rs4779584	GREM1, SCG5, CRAC1, HMPS	T	C	0.1087	0.0188	7.481e-09	0.2534	Distal colon cancer
rs36068942		A	G	0.0946	0.017	2.851e-08	0.2724	Distal colon cancer
rs4968126		A	G	0.0854	0.0157	4.992e-08	0.3809	Distal colon cancer
rs35204860		T	C	-0.1036	0.0185	2.266e-08	0.3103	Distal colon cancer
rs4939824		A	G	0.099	0.017	6.071e-09	0.6919	Distal colon cancer
rs8106006		T	C	-0.1896	0.0297	1.733e-10	0.1563	Distal colon cancer
rs1136892		T	C	0.0828	0.0152	4.791e-08	0.5544	Distal colon cancer
rs477859		A	G	-0.1036	0.019	4.779e-08	0.1986	Distal colon cancer
rs6054200		A	G	-0.0857	0.0152	1.909e-08	0.6086	Distal colon cancer
rs11707109		A	G	-0.117	0.0208	1.755e-08	0.8319	Distal colon cancer
rs7679673	AC004069.2, TET2, SYKxTET2, ZNF280BxTET2	A	C	-0.0884	0.0153	6.939e-09	0.438	Distal colon cancer
rs10076449		T	C	-0.083	0.0151	4.081e-08	0.4554	Distal colon cancer
rs72746147		A	T	-0.0879	0.0161	4.934e-08	0.6968	Distal colon cancer
rs3117116		A	G	0.1261	0.0228	3.101e-08	0.8468	Distal colon cancer
rs16892766	EIF3H	A	C	-0.1763	0.0256	5.634e-12	0.8914	Distal colon cancer
rs3847136		A	G	0.1303	0.0161	5.035e-16	0.3224	Distal colon cancer
rs17578234		T	C	0.1128	0.0194	5.65e-09	0.1927	Rectal cancer
rs704017	ZMIZ1-AS1, ZMIZ1, POLR3A, LOC283050	A	G	-0.0904	0.0155	5.98e-09	0.4291	Rectal cancer
rs10905436		A	G	-0.1162	0.0165	1.77e-12	0.3195	Rectal cancer
rs34060775		T	C	0.1101	0.0191	8.51e-09	0.3022	Rectal cancer
rs36029541		T	C	-0.1562	0.0163	8.72e-22	0.6823	Rectal cancer
rs10899009		T	C	0.0837	0.0151	2.83e-08	0.5128	Rectal cancer
rs12146099		A	G	-0.0906	0.0156	5.89e-09	0.3916	Rectal cancer
rs12140498		T	C	0.1076	0.0184	5.22e-09	0.2089	Rectal cancer
rs4307773		T	C	0.0963	0.0153	3e-10	0.4305	Rectal cancer
rs12429277		A	C	0.1002	0.0182	3.69e-08	0.2363	Rectal cancer
rs4444235	BMP4, DDHD1, MIR5580	T	C	-0.0952	0.0151	2.66e-10	0.5167	Rectal cancer
rs16969344		C	G	-0.1498	0.0247	1.34e-09	0.8583	Rectal cancer
rs11071922		T	C	0.0942	0.0151	4.41e-10	0.5007	Rectal cancer
rs7223467		T	G	-0.1064	0.0172	6.68e-10	0.3616	Rectal cancer
rs12953859		A	G	-0.1057	0.0168	2.93e-10	0.3313	Rectal cancer
rs6066825	PREX1	A	G	0.088	0.0159	2.98e-08	0.6408	Rectal cancer
rs117640964		T	C	-0.1921	0.035	4.2e-08	0.0658	Rectal cancer
rs1411300		A	G	-0.1042	0.0161	9.94e-11	0.687	Rectal cancer
rs10931833		T	G	0.1096	0.0178	6.85e-10	0.2926	Rectal cancer
rs9872703		A	G	-0.1377	0.0248	2.82e-08	0.8825	Rectal cancer
rs2853672		A	C	0.1077	0.0152	1.35e-12	0.4908	Rectal cancer
rs3094188	PSORS1C3, POU5F1	A	C	0.0888	0.0159	2.57e-08	0.6577	Rectal cancer
rs1947135		A	C	-0.0863	0.0155	2.71e-08	0.3975	Rectal cancer
rs2437844		A	G	0.1593	0.0231	4.93e-12	0.1372	Rectal cancer
rs3847136		A	G	0.1198	0.0162	1.18e-13	0.3176	Rectal cancer

## Sheet: Supplementary File 1b
Supplementary File 1b: Mean and SD values for raw metabolic traits at different life stages among ALSPAC offspring
		Childhood (age 8y)			Early Adolescence (age 16y)			Late Adolescence (age 18y)			Early Adulthood (age 25y)
Biomarker.name	Unit	N	Mean	SD	N	Mean	SD	N	Mean	SD	N	Mean	SD
Total lipids in large LDL	mmol/l	4765	0.997978	0.225661	2917	0.113899	0.032576	2612	0.0925462	0.0925462	NA	NA	NA
Total lipids in large HDL	mmol/l	4765	0.790725	0.173111	2926	1.19404	0.0708505	2604	1.17905	1.17905	NA	NA	NA
Cholesterol in IDL	mmol/l	4765	0.594601	0.119894	2925	0.0112942	0.0206266	2603	11.4664	11.4664	NA	NA	NA
Average diameter for VLDL particles	nm	4765	36.4714	1.29506	2924	0.126428	0.239025	2603	0.110844	0.110844	NA	NA	NA
Free cholesterol in IDL	mmol/l	4765	0.169212	0.037108	2920	17.4688	0.402968	2603	17.4164	17.4164	NA	NA	NA
Free cholesterol to total lipids ratio in medium LDL	%	4765	22.05	2.493	2825	0.00870982	0.0084391	2546	1.48267	1.48267	NA	NA	NA
Ratio of conjugated linoeic acid to total fatty acids	%	4760	0.169051	0.166457	2824	0.0112331	0.009767	2546	0.0115173	0.0115173	NA	NA	NA
Triglycerides to total lipids ratio in medium LDL	%	4765	6.57093	1.86021	2926	0.415643	0.0665982	2435	0.405877	0.405877	NA	NA	NA
Apolipoprotein B	g/l	4765	0.728501	0.12447	2930	1.41824	0.122197	2613	1.40688	1.40688	2559	1.45728	0.210376
Ratio of apolipoprotein B to apolipoprotein A1	ratio	4765	0.493717	0.0863873	2930	0.657464	0.119408	2613	0.661294	0.661294	2559	0.682038	0.157141
Total cholesterol in HDL2	mmol/l	4765	0.892385	0.137463	2930	0.465257	0.0844451	2613	0.472195	0.472195	2559	0.474013	0.116286
Total cholesterol in HDL2	mmol/l	4765	0.599029	0.0741789	2930	0.859265	0.141812	2613	0.843833	0.843833	2559	0.940519	0.316897
HDL cholesterol	mmol/l	4765	1.49142	0.206657	2930	0.859265	0.141812	2613	0.843833	0.843833	2559	0.940519	0.316897
LDL cholesterol	mmol/l	4765	1.22378	0.33381	2930	1.42192	0.21754	2613	1.39678	1.39678	2559	1.396	0.347337
Remnant cholesterol (non-HDL, non-LDL -cholesterol)	mmol/l	4765	1.22168	0.241137	2930	1.04166	0.32996	2613	1.03239	1.03239	2559	1.23079	0.419603
Total cholesterol	mmol/l	4765	3.93686	0.601569	2930	1.08236	0.240186	2613	1.09211	1.09211	2559	0.94664	0.304407
VLDL cholesterol	mmol/l	4765	0.627204	0.155768	2930	3.54594	0.628133	2613	3.52127	3.52127	2559	3.57341	0.813985
Average diameter for HDL particles	nm	4765	10.0672	0.151336	2930	0.549	0.143894	2613	0.565019	0.565019	2559	0.435939	0.185795
Concentration of large HDL particles	mmol/l	4765	1.09842e-06	2.28306e-07	2930	0.0904911	0.0038495	2613	0.0893054	0.0893054	2559	0.0926357	0.00553684
Cholesteryl esters in large VLDL	mmol/l	4765	0.0214092	0.0169962	2930	10.039	0.161462	2613	9.9758	9.9758	2559	9.92392	0.24715
Free cholesterol in large VLDL	mmol/l	4765	0.0207277	0.0197943	2930	23.7159	0.113628	2613	23.6957	23.6957	2559	23.5858	0.185574
Total lipids in large VLDL	mmol/l	4765	0.194476	0.162103	2930	36.1426	1.12428	2613	36.1795	36.1795	2559	36.2737	1.18052
Concentration of large VLDL particles	mmol/l	4765	3.21288e-09	2.70086e-09	2930	0.00248536	0.00264148	2613	0.00275211	0.00275211	2559	0.00156287	0.0026584
Phospholipids in large VLDL	mmol/l	4765	0.0330547	0.0290125	2930	0.00113912	0.00140157	2613	0.0014293	0.0014293	2559	0.000827878	0.00143507
Triglycerides in large VLDL	mmol/l	4765	0.119288	0.0968827	2930	0.00134629	0.00130992	2613	0.00132281	0.00132281	2559	0.000734994	0.00125272
Cholesterol in medium HDL	mmol/l	4765	0.394788	0.0405424	2930	0.0177912	0.0160215	2613	0.0176634	0.0176634	2559	0.0113787	0.015498
Cholesteryl esters in medium HDL	mmol/l	4765	0.326123	0.0334587	2930	6.83177e-11	7.11453e-11	2613	6.82741e-11	6.82741e-11	2559	5.41362e-11	7.24295e-11
Free cholesterol in medium HDL	mmol/l	4765	0.0686611	0.00748022	2930	0.00211596	0.00194146	2613	0.00205694	0.00205694	2559	0.00123916	0.00194075
Total lipids in medium HDL	mmol/l	4765	0.815619	0.0850153	2930	0.0131904	0.0115088	2613	0.0128553	0.0128553	2559	0.00857665	0.0109563
Concentration of medium HDL particles	mmol/l	4765	1.54603e-06	1.67801e-07	2930	0.533495	0.121517	2613	0.527179	0.527179	2559	0.510701	0.147655
Phospholipids in medium HDL	mmol/l	4765	0.392361	0.0465061	2930	0.381712	0.08645	2613	0.378893	0.378893	2559	0.359852	0.106956
Triglycerides in medium HDL	mmol/l	4765	0.0284816	0.00788512	2930	0.151779	0.03655	2613	0.148279	0.148279	2559	0.150848	0.0416178
Cholesterol in medium LDL	mmol/l	4765	0.348513	0.104631	2930	0.845679	0.180328	2613	0.837089	0.837089	2559	0.821795	0.215617
Cholesteryl esters in medium LDL	mmol/l	4765	0.232093	0.0862792	2930	6.8973e-08	1.37669e-08	2613	6.77299e-08	6.77299e-08	2559	8.09915e-08	2.08851e-08
Free cholesterol in medium LDL	mmol/l	4765	0.116413	0.0193281	2930	0.224033	0.0465427	2613	0.220997	0.220997	2559	0.230364	0.0539532
Total lipids in medium LDL	mmol/l	4765	0.541868	0.140313	2930	0.0881438	0.0203318	2613	0.0889026	0.0889026	2559	0.0807296	0.020556
Concentration of medium LDL particles	mmol/l	4765	8.39263e-08	2.30379e-08	2930	0.376476	0.0991442	2613	0.350573	0.350573	2559	0.347101	0.167452
Phospholipids in medium LDL	mmol/l	4765	0.157601	0.0264789	2930	0.296261	0.077992	2613	0.276039	0.276039	2559	0.271922	0.127519
Triglycerides in medium LDL	mmol/l	4765	0.0357717	0.0156323	2930	0.0802192	0.0212584	2613	0.0745303	0.0745303	2559	0.0751792	0.0400047
Cholesterol in medium VLDL	mmol/l	4765	0.103554	0.0513584	2930	0.755219	0.180732	2613	0.712871	0.712871	2559	0.742256	0.317581
Cholesteryl esters in medium VLDL	mmol/l	4765	0.0556659	0.0279753	2930	1.04759e-06	2.39095e-07	2613	9.95046e-07	9.95046e-07	2559	1.18076e-06	4.96066e-07
Free cholesterol in medium VLDL	mmol/l	4765	0.0478889	0.0254441	2930	0.356392	0.0805512	2613	0.340952	0.340952	2559	0.369637	0.142595
Total lipids in medium VLDL	mmol/l	4765	0.408721	0.199629	2930	0.0223565	0.00361974	2613	0.0213652	0.0213652	2559	0.0255183	0.011564
Concentration of medium VLDL particles	mmol/l	4765	1.16842e-08	5.90045e-09	2930	0.565716	0.165412	2613	0.560334	0.560334	2559	0.647936	0.201034
Phospholipids in medium VLDL	mmol/l	4765	0.08297	0.038278	2930	0.388505	0.124927	2613	0.385038	0.385038	2559	0.45429	0.153597
Triglycerides in medium VLDL	mmol/l	4765	0.222197	0.112853	2930	0.177209	0.0409178	2613	0.175297	0.175297	2559	0.193647	0.0480998
Cholesterol in small HDL	mmol/l	4765	0.357423	0.0445779	2930	0.872365	0.22735	2613	0.867949	0.867949	2559	0.975427	0.271201
Cholesteryl esters in small HDL	mmol/l	4765	0.235854	0.0399893	2930	9.6902e-08	2.498e-08	2613	9.64055e-08	9.64055e-08	2559	1.3629e-07	3.77348e-08
Free cholesterol in small HDL	mmol/l	4765	0.121567	0.00950901	2930	0.231673	0.0462011	2613	0.232501	0.232501	2559	0.258672	0.056587
Total lipids in small HDL	mmol/l	4765	1.00224	0.0706747	2930	0.0749964	0.0219431	2613	0.0751269	0.0751269	2559	0.0688197	0.0200617
Concentration of small HDL particles	mmol/l	4765	3.98394e-06	2.52501e-07	2930	0.0280912	0.027975	2613	0.0302144	0.0302144	2559	0.0283489	0.0343121
Phospholipids in small HDL	mmol/l	4765	0.602423	0.0448184	2930	0.0149498	0.0137395	2613	0.0165685	0.0165685	2559	0.0160457	0.0170705
Triglycerides in small HDL	mmol/l	4765	0.0423742	0.00866727	2930	0.0131413	0.0144341	2613	0.0136461	0.0136461	2559	0.0123031	0.0173879
Cholesterol in small LDL	mmol/l	4765	0.220087	0.0657938	2930	0.136971	0.122328	2613	0.143179	0.143179	2559	0.149006	0.155199
Cholesteryl esters in small LDL	mmol/l	4765	0.146331	0.0562166	2930	2.26436e-09	2.02344e-09	2613	2.36432e-09	2.36432e-09	2559	2.62955e-09	2.68486e-09
Free cholesterol in small LDL	mmol/l	4765	0.0737505	0.0120072	2930	0.0224349	0.0218256	2613	0.0234174	0.0234174	2559	0.0266399	0.0282839
Total lipids in small LDL	mmol/l	4765	0.362748	0.0893025	2930	0.0864477	0.0728605	2613	0.0895505	0.0895505	2559	0.0940167	0.0928684
Concentration of small LDL particles	mmol/l	4765	1.08333e-07	2.51064e-08	2930	0.385146	0.0435649	2613	0.389334	0.389334	2559	0.458573	0.110619
Phospholipids in small LDL	mmol/l	4765	0.119998	0.0184494	2930	0.319493	0.0358966	2613	0.322934	0.322934	2559	0.375444	0.0866448
Triglycerides in small LDL	mmol/l	4765	0.0226699	0.0095125	2930	0.065662	0.00807907	2613	0.066392	0.066392	2559	0.0831294	0.0241664
Cholesterol in small VLDL	mmol/l	4765	0.208164	0.0427418	2930	0.786488	0.0944715	2613	0.805521	0.805521	2559	0.915128	0.200141
Cholesteryl esters in small VLDL	mmol/l	4765	0.130371	0.0290169	2930	1.48409e-06	1.86375e-07	2613	1.53198e-06	1.53198e-06	2559	2.15227e-06	4.58448e-07
Free cholesterol in small VLDL	mmol/l	4765	0.0778034	0.015675	2930	0.375169	0.051284	2613	0.387425	0.387425	2559	0.416399	0.0898271
Total lipids in small VLDL	mmol/l	4765	0.533668	0.116596	2930	0.0261595	0.00767912	2613	0.0287698	0.0287698	2559	0.0401544	0.0113172
Concentration of small VLDL particles	mmol/l	4765	2.45274e-08	5.829e-09	2930	0.292276	0.101951	2613	0.289896	0.289896	2559	0.363483	0.135239
Phospholipids in small VLDL	mmol/l	4765	0.125508	0.023112	2930	0.188156	0.0828049	2613	0.185727	0.185727	2559	0.253072	0.107922
Triglycerides in small VLDL	mmol/l	4765	0.199989	0.0591675	2930	0.10412	0.0196601	2613	0.104167	0.104167	2559	0.110409	0.0278602
Cholesterol in very large HDL	mmol/l	4765	0.346561	0.0653044	2930	0.461902	0.138498	2613	0.462382	0.462382	2559	0.555391	0.177099
Cholesteryl esters in very large HDL	mmol/l	4765	0.269608	0.0471885	2930	7.17465e-08	2.13905e-08	2613	7.20559e-08	7.20559e-08	2559	1.08613e-07	3.46136e-08
Free cholesterol in very large HDL	mmol/l	4765	0.0769492	0.0188977	2930	0.140058	0.0277342	2613	0.141978	0.141978	2559	0.157931	0.0359876
Total lipids in very large HDL	mmol/l	4765	0.610598	0.137906	2930	0.0295681	0.0132971	2613	0.0305132	0.0305132	2559	0.0339767	0.0107079
Concentration of very large HDL particles	mmol/l	4765	4.65639e-07	1.14708e-07	2930	0.0820552	0.0447228	2613	0.0873907	0.0873907	2559	0.0941278	0.0595177
Phospholipids in very large HDL	mmol/l	4765	0.245587	0.0745381	2930	0.0438012	0.0250744	2613	0.0479489	0.0479489	2559	0.0544586	0.0313355
Triglycerides in very large HDL	mmol/l	4765	0.0184606	0.00522368	2930	0.0382517	0.0210079	2613	0.0394391	0.0394391	2559	0.0396696	0.0289801
Cholesterol in very large VLDL	mmol/l	4765	0.0115098	0.0109916	2930	0.342385	0.166708	2613	0.355144	0.355144	2559	0.37838	0.234291
Cholesteryl esters in very large VLDL	mmol/l	4765	0.00599301	0.00558025	2930	9.78866e-09	4.85031e-09	2613	1.00938e-08	1.00938e-08	2559	1.14614e-08	7.06454e-09
Free cholesterol in very large VLDL	mmol/l	4765	0.00551686	0.00546767	2930	0.0688667	0.0319365	2613	0.0710285	0.0710285	2559	0.0766586	0.0449041
Total lipids in very large VLDL	mmol/l	4765	0.0565324	0.0571024	2930	0.19146	0.0928362	2613	0.19672	0.19672	2559	0.207593	0.131321
Concentration of very large VLDL particles	mmol/l	4765	5.64569e-10	5.92082e-10	2930	0.346274	0.0463254	2613	0.370539	0.370539	2559	0.444978	0.107647
Phospholipids in very large VLDL	mmol/l	4765	0.00884462	0.00957688	2930	0.229146	0.0403669	2613	0.250387	0.250387	2559	0.337433	0.0944055
Triglycerides in very large VLDL	mmol/l	4765	0.0361789	0.0366579	2930	0.117125	0.0101774	2613	0.12014	0.12014	2559	0.107544	0.0162723
Cholesterol in very small VLDL	mmol/l	4765	0.257939	0.0449258	2930	0.975389	0.0812817	2613	1.01896	1.01896	2559	1.08907	0.169996
Cholesteryl esters in very small VLDL	mmol/l	4765	0.179949	0.0307408	2930	3.90259e-06	2.76167e-07	2613	4.03873e-06	4.03873e-06	2559	4.91039e-06	7.45132e-07
Free cholesterol in very small VLDL	mmol/l	4765	0.0779904	0.0159233	2930	0.589839	0.0473584	2613	0.607046	0.607046	2559	0.602609	0.0762809
Total lipids in very small VLDL	mmol/l	4765	0.478013	0.0727564	2930	0.0392581	0.00767659	2613	0.04137	0.04137	2559	0.0414885	0.0095633
Concentration of very small VLDL particles	mmol/l	4765	3.06371e-08	4.61938e-09	2930	0.183656	0.0632216	2613	0.182163	0.182163	2559	0.219369	0.0870724
Phospholipids in very small VLDL	mmol/l	4765	0.122395	0.0242041	2930	0.118308	0.0523253	2613	0.116395	0.116395	2559	0.154663	0.0679245
Triglycerides in very small VLDL	mmol/l	4765	0.0976859	0.0196694	2930	0.0653423	0.0119043	2613	0.0657664	0.0657664	2559	0.0647058	0.0198689
Cholesterol to total lipids ratio in chylomicrons and extremely large VLDL	%	4765	13.5529	3.21584	2930	0.307654	0.0870513	2613	0.307118	0.307118	2559	0.354965	0.119381
Cholesteryl esters to total lipids ratio in chylomicrons and extremely large VLDL	%	4765	6.33648	2.94165	2930	9.23445e-08	2.3405e-08	2613	9.21993e-08	9.21993e-08	2559	1.26197e-07	4.20172e-08
Free cholesterol to total lipids ratio in chylomicrons and extremely large VLDL	%	4765	7.21659	0.898825	2930	0.105972	0.018762	2613	0.106068	0.106068	2559	0.114786	0.0284925
Phospholipids to total lipids ratio in chylomicrons and extremely large VLDL	%	4765	11.9952	0.969173	2930	0.0180345	0.00778327	2613	0.0188892	0.0188892	2559	0.0208093	0.00719991
Triglycerides to total lipids ratio in chylomicrons and extremely large VLDL	%	4765	74.4948	4.0562	2930	0.185942	0.0417954	2613	0.193153	0.193153	2559	0.140695	0.0532125
Cholesterol to total lipids ratio in IDL	%	4765	63.0734	2.54078	2930	0.117997	0.0285076	2613	0.122446	0.122446	2559	0.0832098	0.0350032
Cholesteryl esters to total lipids ratio in IDL	%	4765	45.1822	2.60608	2930	0.0679574	0.0146843	2613	0.0707138	0.0707138	2559	0.0574852	0.0197458
Free cholesterol to total lipids ratio in IDL	%	4765	17.8907	1.09279	2930	0.474303	0.106162	2613	0.492252	0.492252	2559	0.418981	0.146414
Phospholipids to total lipids ratio in IDL	%	4765	26.3134	1.14036	2930	2.16987e-08	5.09153e-09	2613	2.24562e-08	2.24562e-08	2559	2.15105e-08	7.60561e-09
Triglycerides to total lipids ratio in IDL	%	4765	10.6122	1.93149	2930	0.11126	0.0213398	2613	0.116815	0.116815	2559	0.10287	0.0293106
Cholesterol to total lipids ratio in large HDL	%	4765	49.3516	2.02766	2930	0.177102	0.0495289	2613	0.182291	0.182291	2559	0.175416	0.0701345
Cholesteryl esters to total lipids ratio in large HDL	%	4765	38.7763	1.6533	2930	0.31399	0.0645053	2613	0.286353	0.286353	2559	0.145335	0.0796792
Free cholesterol to total lipids ratio in large HDL	%	4765	10.5762	0.489825	2930	0.244526	0.0467239	2613	0.224513	0.224513	2559	0.108072	0.0553886
Phospholipids to total lipids ratio in large HDL	%	4765	47.4905	1.50718	2930	0.0694656	0.0186198	2613	0.0618293	0.0618293	2559	0.0372625	0.0247527
Triglycerides to total lipids ratio in large HDL	%	4765	3.1581	0.771212	2930	0.561881	0.139646	2613	0.506466	0.506466	2559	0.342032	0.188863
Cholesterol to total lipids ratio in large LDL	%	4765	65.252	2.49355	2930	4.32441e-07	1.17077e-07	2613	3.88838e-07	3.88838e-07	2559	3.42093e-07	1.86988e-07
Cholesteryl esters to total lipids ratio in large LDL	%	4765	45.3276	2.62035	2930	0.231801	0.0759736	2613	0.205706	0.205706	2559	0.186501	0.107576
Free cholesterol to total lipids ratio in large LDL	%	4765	19.9247	0.985244	2930	0.0160989	0.00454677	2613	0.0144243	0.0144243	2559	0.0101964	0.00583057
Phospholipids to total lipids ratio in large LDL	%	4765	25.9909	1.44962	2930	0.00743219	0.00783364	2613	0.00779685	0.00779685	2559	0.00447983	0.00794188
Triglycerides to total lipids ratio in large LDL	%	4765	8.75831	1.77063	2930	0.00399051	0.0041053	2613	0.00429597	0.00429597	2559	0.00247903	0.00427315
Cholesterol to total lipids ratio in large VLDL	%	4765	20.6438	5.6	2930	0.00344166	0.00377069	2613	0.00350062	0.00350062	2559	0.00200082	0.00368122
Cholesteryl esters to total lipids ratio in large VLDL	%	4765	11.6792	8.182	2930	0.035785	0.0394449	2613	0.0361727	0.0361727	2559	0.0280757	0.042482
Free cholesterol to total lipids ratio in large VLDL	%	4765	9.162	8.77664	2930	3.56815e-10	4.0308e-10	2613	3.57214e-10	3.57214e-10	2559	2.94533e-10	4.3879e-10
Phospholipids to total lipids ratio in large VLDL	%	4765	15.7252	3.03261	2930	0.00526591	0.0064831	2613	0.00526893	0.00526893	2559	0.00420852	0.00700096
Triglycerides to total lipids ratio in large VLDL	%	4765	65.5324	116.982	2930	0.0230866	0.0252661	2613	0.0231062	0.0231062	2559	0.0193874	0.0276865
Cholesterol to total lipids ratio in medium HDL	%	4765	48.4384	1.62235	2930	0.242992	0.040437	2613	0.243714	0.243714	2559	0.166723	0.0462343
Cholesteryl esters to total lipids ratio in medium HDL	%	4765	40.0192	1.49114	2930	0.170918	0.0285222	2613	0.171139	0.171139	2559	0.111987	0.0319558
Free cholesterol to total lipids ratio in medium HDL	%	4765	8.4187	0.296416	2930	0.072072	0.0133475	2613	0.0725724	0.0725724	2559	0.0547362	0.0150168
Phospholipids to total lipids ratio in medium HDL	%	4765	48.0403	1.24362	2930	0.440213	0.0726186	2613	0.443712	0.443712	2559	0.354928	0.0918923
Triglycerides to total lipids ratio in medium HDL	%	4765	3.52252	1.04016	2930	2.79199e-08	4.74414e-09	2613	2.8245e-08	2.8245e-08	2559	2.8125e-08	7.21085e-09
Cholesterol to total lipids ratio in medium LDL	%	4765	63.5834	3.85423	2930	0.11014	0.0248502	2613	0.110424	0.110424	2559	0.110098	0.0301788
Cholesteryl esters to total lipids ratio in medium LDL	%	4765	41.5322	5.8371	2930	0.0870938	0.0175012	2613	0.0895878	0.0895878	2559	0.0781054	0.0221364
Phospholipids to total lipids ratio in medium VLDL	%	4765	20.5359	0.909377	2930	12.1699	3.59291	2613	14.0372	14.0372	2559	13.4765	21.7064
Triglycerides to total lipids ratio in medium VLDL	%	4765	54.1701	4.02542	2930	5.17243	2.98931	2613	7.13187	7.13187	2559	7.95505	14.7829
Cholesterol to total lipids ratio in small HDL	%	4765	35.609	3.20603	2930	7.00106	1.04742	2613	6.90052	6.90052	2559	5.5214	7.27821
Cholesteryl esters to total lipids ratio in small HDL	%	4765	23.4793	3.35151	2930	11.6925	0.977255	2613	11.4483	11.4483	2559	9.97712	14.8256
Free cholesterol to total lipids ratio in small HDL	%	4765	12.1294	0.415372	2930	76.1705	4.34511	2613	74.5851	74.5851	2559	76.5466	25.7417
Phospholipids to total lipids ratio in small HDL	%	4765	60.1511	2.71764	2930	62.9087	2.27953	2613	62.7882	62.7882	2559	61.6703	2.67941
Triglycerides to total lipids ratio in small HDL	%	4765	4.23764	0.874748	2930	45.0571	2.27818	2613	45.1787	45.1787	2559	43.3671	2.47378
Cholesterol to total lipids ratio in small LDL	%	4765	59.8717	4.51313	2930	17.8513	0.955743	2613	17.6084	17.6084	2559	18.303	1.00274
Cholesteryl esters to total lipids ratio in small LDL	%	4765	39.0086	6.31315	2930	26.5407	0.902987	2613	26.4722	26.4722	2559	28.2643	1.18545
Free cholesterol to total lipids ratio in small LDL	%	4765	20.8608	2.62744	2930	10.5488	1.81556	2613	10.7384	10.7384	2559	10.0654	2.0761
Phospholipids to total lipids ratio in small LDL	%	4765	33.8942	3.82099	2930	49.5463	2.04336	2613	48.8318	48.8318	2559	45.1831	5.56113
Triglycerides to total lipids ratio in small LDL	%	4765	6.23686	1.85305	2930	38.9913	1.66835	2613	38.444	38.444	2559	35.701	3.87965
Cholesterol to total lipids ratio in small VLDL	%	4765	39.2585	3.62811	2930	10.5551	0.479897	2613	10.3875	10.3875	2559	9.48206	1.9408
Cholesteryl esters to total lipids ratio in small VLDL	%	4765	24.629	3.37319	2930	47.3746	1.51921	2613	48.0268	48.0268	2559	50.9802	4.99643
Free cholesterol to total lipids ratio in small VLDL	%	4765	14.6327	0.501566	2930	3.07985	0.717709	2613	3.14394	3.14394	2559	3.83675	4.18005
Phospholipids to total lipids ratio in small VLDL	%	4765	23.6901	1.0385	2930	64.2713	2.89761	2613	63.9131	63.9131	2559	65.7644	3.112
Triglycerides to total lipids ratio in small VLDL	%	4765	37.0489	3.99915	2930	43.779	3.42724	2613	43.5007	43.5007	2559	45.719	3.74735
Cholesterol to total lipids ratio in very large HDL	%	4765	57.3386	4.00958	2930	20.4916	1.10881	2613	20.4124	20.4124	2559	20.0453	1.09538
Cholesteryl esters to total lipids ratio in very large HDL	%	4765	44.789	4.08241	2930	27.0123	1.97577	2613	27.3341	27.3341	2559	27.0029	1.95361
Free cholesterol to total lipids ratio in very large HDL	%	4765	12.5487	0.439715	2930	8.71898	1.74166	2613	8.75436	8.75436	2559	7.23272	1.68701
Phospholipids to total lipids ratio in very large HDL	%	4765	39.5612	4.30273	2930	18.0494	6.157	2613	18.8664	18.8664	2559	18.1553	16.8052
Triglycerides to total lipids ratio in very large HDL	%	4765	3.10211	0.914865	2930	10.7288	9.18456	2613	11.467	11.467	2559	11.7462	11.1588
Cholesterol to total lipids ratio in very large VLDL	%	4765	24.8442	16.0993	2930	7.45343	3.44174	2613	7.54792	7.54792	2559	6.40908	6.7094
Cholesteryl esters to total lipids ratio in very large VLDL	%	4765	13.5797	9.31906	2930	14.4293	3.89991	2613	14.4286	14.4286	2559	16.9837	10.0751
Free cholesterol to total lipids ratio in very large VLDL	%	4765	11.1951	5.6939	2930	69.0269	77.929	2613	66.8199	66.8199	2559	64.861	16.8689
Phospholipids to total lipids ratio in very large VLDL	%	4765	13.8803	3.22149	2930	49.0318	1.62734	2613	48.3784	48.3784	2559	49.9121	2.06757
Triglycerides to total lipids ratio in very large VLDL	%	4765	61.6639	11.0461	2930	40.6827	1.52943	2613	40.1382	40.1382	2559	40.9622	1.68348
Cholesterol to total lipids ratio in very small VLDL	%	4765	53.9068	4.48617	2930	8.35023	0.29797	2613	8.2391	8.2391	2559	8.94998	0.703511
Cholesteryl esters to total lipids ratio in very small VLDL	%	4765	37.6324	3.00138	2930	47.6229	1.27672	2613	48.0283	48.0283	2559	45.5416	0.942982
Free cholesterol to total lipids ratio in very small VLDL	%	4765	16.2744	2.2107	2930	3.3437	0.964349	2613	3.59398	3.59398	2559	4.54632	1.38766
Phospholipids to total lipids ratio in very small VLDL	%	4765	25.4742	2.05192	2930	62.2769	4.30197	2613	61.5287	61.5287	2559	64.2156	5.03224
Triglycerides to total lipids ratio in very small VLDL	%	4765	20.6222	4.1211	2930	38.9042	7.02597	2613	38.0305	38.0305	2559	43.8043	6.8273
Triglycerides in HDL	mmol/l	4765	0.11334	0.0207467	2930	23.3725	3.15064	2613	23.4976	23.4976	2559	20.4112	2.08141
Triglycerides in LDL	mmol/l	4765	0.144795	0.0477699	2930	31.3598	4.02807	2613	31.9337	31.9337	2559	29.3916	3.62387
Total triglycerides	mmol/l	4765	1.05189	0.386134	2930	6.36368	1.86187	2613	6.53993	6.53993	2559	6.3928	1.89321
Triglycerides in VLDL	mmol/l	4765	0.695086	0.335916	2930	23.4528	4.26153	2613	24.0238	24.0238	2559	24.6468	4.45456
3-Hydroxybutyrate	mmol/l	4764	0.0739925	0.0927278	2930	12.5761	3.74465	2613	13.2579	13.2579	2559	14.7629	3.93375
Ratio of docosahexaenoic acid to total fatty acids	%	4762	1.06375	0.219851	2930	10.8752	1.15662	2613	10.7637	10.7637	2559	9.88384	1.66886
Ratio of omega-3 fatty acids to total fatty acids	%	4762	3.24929	0.517748	2930	20.3007	0.968034	2613	20.1555	20.1555	2559	20.7569	2.59454
Ratio of omega-6 fatty acids to total fatty acids	%	4762	33.641	2.60376	2930	56.2435	4.65402	2613	55.8161	55.8161	2559	54.5962	5.0233
Ratio of linoleic acid to total fatty acids	%	4762	27.7153	2.39842	2930	35.4305	2.9137	2613	36.2681	36.2681	2559	40.5546	3.58569
Ratio of polyunsaturated fatty acids to total fatty acids	%	4762	36.8902	2.73579	2930	23.4183	3.0934	2613	24.4777	24.4777	2559	30.67	3.86152
Docosahexaenoic acid	mmol/l	4762	0.10843	0.0266129	2930	12.0117	0.420822	2613	11.7893	11.7893	2559	9.88455	0.389266
Omega-3 fatty acids	mmol/l	4762	0.331266	0.0683979	2930	60.5434	2.69201	2613	59.6672	59.6672	2559	55.577	3.08594
Omega-6 fatty acids	mmol/l	4762	3.42484	0.493891	2930	4.02427	0.696229	2613	4.06386	4.06386	2559	3.86856	0.933133
Linoleic acid	mmol/l	4762	2.82465	0.442329	2930	58.6105	4.88292	2613	58.0726	58.0726	2559	60.4372	5.62791
Polyunsaturated fatty acids	mmol/l	4762	3.75611	0.538231	2930	36.6708	7.21122	2613	35.8683	35.8683	2559	41.8993	6.75754
Total fatty acids	mmol/l	4762	10.2298	1.61448	2930	21.937	2.89178	2613	22.2036	22.2036	2559	18.5378	1.46137
Acetoacetate	mmol/l	4762	0.0524564	0.0451246	2930	35.5718	4.53256	2613	35.838	35.838	2559	33.4891	4.42871
Total esterified cholesterol	mmol/l	4761	2.77218	0.430021	2930	5.82157	1.64983	2613	6.08979	6.08979	2559	6.07388	1.75396
Estimated description of fatty acid chain length, not actual carbon number		4761	17.2654	0.355483	2930	39.3016	3.31724	2613	39.3054	39.3054	2559	33.3264	4.44207
Degree of unsaturation	degree	4761	1.15756	0.0603129	2930	24.9491	3.12989	2613	24.9216	24.9216	2559	19.5721	4.24256
Total free cholesterol	mmol/l	4761	1.16444	0.181861	2930	14.3563	0.513771	2613	14.3862	14.3862	2559	13.7542	0.961321
Total cholines	mmol/l	4761	2.17109	0.298506	2930	23.6214	1.05999	2613	23.917	23.917	2559	25.0825	2.36251
Histidine	mmol/l	4760	0.0787644	0.0146083	2930	37.0782	3.45414	2613	36.779	36.779	2559	41.5911	4.37513
Ratio of monounsaturated fatty acids to total fatty acids	%	4760	23.2636	2.6853	2930	56.5792	4.23092	2613	57.2825	57.2825	2559	43.6528	10.19
Ratio of saturated fatty acids to total fatty acids	%	4760	39.8479	1.79238	2930	44.2749	4.40174	2613	45.1323	45.1323	2559	33.8253	11.0924
Conjugated linoleic acid	mmol/l	4760	0.0178218	0.0178777	2930	12.3047	0.406327	2613	12.1483	12.1483	2559	9.82768	2.72899
Monounsaturated fatty acids	mmol/l	4760	2.39697	0.568404	2930	40.482	4.43869	2613	39.7882	39.7882	2559	52.5216	11.8925
Saturated fatty acids	mmol/l	4760	4.07717	0.678902	2930	2.9403	0.827005	2613	2.93245	2.93245	2559	3.82563	5.13893
Pyruvate	mmol/l	4760	0.102047	0.0339692	2930	25.0841	13.3947	2613	26.2567	26.2567	2559	16.0656	24.3313
Ratio of triglycerides to phosphoglycerides	ratio	4760	0.525647	0.207663	2930	14.0268	7.42523	2613	15.4381	15.4381	2559	9.47968	14.6824
Phosphoglycerides	mmol/l	4760	1.76916	0.272493	2930	10.9303	4.92187	2613	10.7269	10.7269	2559	6.58598	9.92241
Creatinine	mmol/l	4759	0.0364666	0.00604438	2930	12.233	3.96599	2613	11.7768	11.7768	2559	13.1355	18.8288
Glutamine	mmol/l	4758	0.540767	0.0581459	2930	62.8233	11.2503	2613	62.0896	62.0896	2559	70.799	28.7191
Albumin	g/l	4758	0.0901998	0.00360682	2930	55.2859	3.67756	2613	55.0303	55.0303	2559	46.7903	3.06933
Citrate	mmol/l	4758	0.127264	0.0250515	2930	38.9237	3.07868	2613	38.6635	38.6635	2559	31.4062	2.96947
Phenylalanine	mmol/l	4755	0.0437309	0.00857971	2930	16.3618	1.42887	2613	16.3662	16.3662	2559	15.3841	1.07838
Tyrosine	mmol/l	4752	0.0680456	0.0157456	2930	24.8206	2.19003	2613	24.6663	24.6663	2559	30.9636	2.32718
Glucose	mmol/l	4744	4.18978	0.510519	2930	19.8966	3.09572	2613	20.3069	20.3069	2559	22.2463	3.8658
Phosphatidylcholines	mmol/l	4742	1.84133	0.27439	2930	0.103873	0.0191614	2613	0.105929	0.105929	2559	0.117357	0.02886
Sphingomyelins	mmol/l	4698	0.450096	0.0642566	2930	0.1226	0.0424855	2613	0.12453	0.12453	2559	0.123605	0.0374385
Diacylglycerol	mmol/l	4672	0.0112875	0.0108856	2930	0.892995	0.304404	2613	0.913474	0.913474	2559	0.904789	0.396713
Ratio of diacylglycerol to triglycerides	%	4672	0.0114281	0.0101165	2930	0.578345	0.262877	2613	0.594081	0.594081	2559	0.583097	0.350188
Valine	mmol/l	4767	0.141732	0.0344922	2930	0.253494	0.05241	2612	0.230184	0.230184	2559	0.343286	0.0556749
Glycoprotein acetyls	mmol/l	4766	1.23014	0.138015	2930	0.0585144	0.00993083	2612	0.0574673	0.0574673	2559	0.0642222	0.0132924
Phospholipids in large LDL	mmol/l	4765	0.256462	0.0459716	2930	0.0276009	0.0228413	2612	0.0377563	0.0377563	2559	0.0304369	0.0105666
Phospholipids in large HDL	mmol/l	4765	0.374078	0.0764042	2928	0.0592593	0.00939245	2612	0.0642595	0.0642595	2559	0.0560973	0.00938513
Concentration of large LDL particles	mmol/l	4765	1.10457e-07	2.60024e-08	2928	1.20826	0.126965	2612	1.21714	1.21714	2559	1.23231	0.17227
Free cholesterol in large LDL	mmol/l	4765	0.197933	0.0413741	2923	1.27233	0.62822	2612	0.982084	0.982084	2559	0.94516	0.461721
Cholesterol in large LDL	mmol/l	4765	0.655173	0.164393	2915	0.11104	0.022865	2612	0.0932482	0.0932482	2559	0.160621	0.0248492
Leucine	mmol/l	4766	0.0609315	0.014951	2908	0.0589396	0.00977	2612	0.0530307	0.0530307	2559	0.044124	0.00943607
Alanine	mmol/l	4766	0.285625	0.0640514	2754	0.0780351	0.00930124	2612	0.0718924	0.0718924	2559	0.0523591	0.00803902
Triglycerides in large LDL	mmol/l	4765	0.0863527	0.023365	2928	0.0423184	0.00947639	2610	0.0436542	0.0436542	2559	0.0515537	0.0370371
Isoleucine	mmol/l	4766	0.0489575	0.0179057	2928	0.0381604	0.00510307	2611	0.0376396	0.0376396	2558	0.0498396	0.00625976
Average diameter for LDL particles	nm	4765	23.641	0.10472	2928	2.46463	0.44339	2604	1446.41	1446.41	2558	2.50967	0.580305
Free cholesterol in large HDL	mmol/l	4765	0.0841568	0.0207683	2927	8.82928	1.49339	2604	4697.97	4697.97	2558	8.55317	1.96793
Cholesteryl esters in IDL	mmol/l	4765	0.425388	0.0852759	2926	0.0918814	0.0300642	2604	54.6709	54.6709	2558	0.112323	0.032361
Total lipids in IDL	mmol/l	4765	0.940719	0.176675	2926	0.280982	0.0723795	2604	172.034	172.034	2558	0.296443	0.0779846
Concentration of IDL particles	mmol/l	4765	7.65508e-08	1.37849e-08	2926	2.98474	0.477288	2604	1594.36	1594.36	2558	2.88301	0.618099
Cholesterol in chylomicrons and extremely large VLDL	mmol/l	4765	0.00390156	0.00368897	2925	1.03533	0.266142	2604	1.10897	1.10897	2558	1.32621	0.291176
Cholesteryl esters in chylomicrons and extremely large VLDL	mmol/l	4765	0.0018343	0.00184621	2925	3.18201	0.60717	2604	3.30252	3.30252	2558	3.48473	0.576254
Free cholesterol in chylomicrons and extremely large VLDL	mmol/l	4765	0.00206729	0.00194025	2925	33.9425	2.53936	2604	32.9997	32.9997	2558	33.8783	2.26747
Triglycerides in IDL	mmol/l	4765	0.0986423	0.0209051	2922	2.22814	0.517196	2604	1089.49	1089.49	2558	2.1536	0.656234
Concentration of chylomicrons and extremely large VLDL particles	mmol/l	4765	1.07424e-10	1.07077e-10	2921	25.1306	2.8351	2604	25.5002	25.5002	2558	24.8978	2.74867
Cholesteryl esters to total lipids ratio in medium VLDL	%	4765	13.8213	3.5986	2921	22.4639	1109.01	2604	1111.4	1111.4	2558	1.93058	0.394568
Triglycerides in large HDL	mmol/l	4765	0.0240244	0.00348396	2928	1.08132	0.193805	2603	575.38	575.38	2558	1.06313	0.237916
Free cholesterol to total lipids ratio in medium VLDL	%	4765	11.4722	0.975936	2927	1.511	0.267764	2603	883.622	883.622	2558	1.52124	0.332888
Phospholipids in IDL	mmol/l	4765	0.247471	0.047637	2922	2.43702	0.412859	2603	1235.57	1235.57	2558	2.34234	0.544515
Cholesterol in large HDL	mmol/l	4765	0.392624	0.0960985	2922	3.26634	0.52458	2603	1767	1767	2558	3.17945	0.681881
Total lipids in chylomicrons and extremely large VLDL	mmol/l	4765	0.0269372	0.0239289	2921	27.7256	2.69829	2603	26.4888	26.4888	2558	27.4831	2.7366
Phospholipids in chylomicrons and extremely large VLDL	mmol/l	4765	0.00324844	0.0029171	2921	37.1297	2.6306	2603	36.3016	36.3016	2558	37.3631	2.52545
Cholesteryl esters in large HDL	mmol/l	4765	0.308476	0.0754683	2921	3.33089	0.613017	2603	1843.25	1843.25	2558	3.22011	0.723902
Triglycerides in chylomicrons and extremely large VLDL	mmol/l	4765	0.0197875	0.0174082	2920	37.7434	2.21973	2603	38.1993	38.1993	2558	37.7391	1.70014
Phospholipids to total lipids ratio in medium LDL	%	4765	29.8498	3.48143	2884	1.72274	0.287797	2581	901.72	901.72	2558	1.57559	0.351723
Apolipoprotein A1	g/l	4765	1.48058	0.111729	2930	0.148008	0.0277962	2612	0.145009	0.145009	2557	0.141273	0.0291399
Lactate	mmol/l	4766	1.35898	0.477819	2929	0.0441306	0.0112289	2612	0.042475	0.042475	2556	0.0459995	0.0118124
Cholesteryl esters in large LDL	mmol/l	4765	0.457243	0.12362	2923	4.32373	0.333526	2612	4.15014	4.15014	2555	3.92292	0.428734
Cholesterol to total lipids ratio in medium VLDL	%	4765	25.2933	3.73621	2926	0.486033	0.17992	2602	0.494787	0.494787	2555	0.414807	0.213204
Cholesterol in large VLDL	mmol/l	4765	0.0421365	0.0364948	2928	0.080536	0.0807011	2609	0.106961	0.106961	2554	0.134223	0.0901585
Acetate	mmol/l	4767	0.0586074	0.0238891	2929	0.538772	0.0604077	2612	0.539874	0.539874	2516	0.425136	0.0772641
			Average	1.57423			6.19256			85.2524			2.08024
			Min	1.07077e-10			7.11453e-11			6.82741e-11			7.24295e-11
			Max	116.982			1109.01			4697.97			28.7191

## Sheet: Supplementary File 1c
Supplementary File 1c: Associations of genetic liability to colorectal cancer with metabolic traits at different early life stages among ALSPAC offspring
		Childhood (age 8y)					Early Adolescence (age 16y)					Late Adolescence (age 18y)					Early Adulthood (age 25y)
Exposure	Outcome	N	Beta	SE	P-value	P-value (adjusted)	N	Beta	SE	P-value	P-value (adjusted)	N	Beta	SE	P-value	P-value (adjusted)	N	Beta	SE	P-value	P-value (adjusted)
Distal colon cancer	3-Hydroxybutyrate	4757	-0.02052	0.014572	0.159087	0.998606	2925	0.001818	0.017735	0.918377	0.989826	2607	0.021181	0.018403	0.249841	0.853394	2554	-0.03674	0.018747	0.050144	0.508282
Colon cancer	3-Hydroxybutyrate	4757	-0.00573	0.014461	0.692159	0.997663	2925	-0.00712	0.018199	0.695826	0.833541	2607	0.011878	0.018713	0.525646	0.639675	2554	-0.02823	0.019346	0.144665	0.793982
Proximal colon cancer	3-Hydroxybutyrate	4757	0.036796	0.015064	0.014619	0.840578	2925	0.00212	0.018193	0.907263	0.981265	2607	0.008936	0.018116	0.621862	0.726032	2554	-0.02681	0.018824	0.154434	0.970622
Rectal cancer	3-Hydroxybutyrate	4757	-0.00579	0.014417	0.687972	0.999758	2925	-0.00379	0.018658	0.839167	0.995226	2607	0.006839	0.018458	0.711028	0.98792	2554	0.009382	0.019811	0.635842	0.983658
Colorectal cancer	3-Hydroxybutyrate	4757	-0.02345	0.014087	0.096009	0.445308	2925	-0.01778	0.018237	0.329643	0.490005	2607	0.010503	0.018555	0.571396	0.688069	2554	0.021904	0.018515	0.236916	0.989619
Colon cancer	Acetate	4760	-0.03132	0.014417	0.029861	0.733164	2925	-0.02075	0.018707	0.267533	0.655485	2608	-0.02856	0.019513	0.143401	0.317137	2559	-0.01469	0.020251	0.468293	0.958067
Proximal colon cancer	Acetate	4760	-0.01007	0.014523	0.488114	0.901214	2925	0.012066	0.018669	0.51811	0.867347	2608	-0.01257	0.018991	0.508135	0.635169	2559	-0.00888	0.019163	0.642952	0.970622
Distal colon cancer	Acetate	4760	-0.02882	0.014118	0.041301	0.998606	2925	0.008304	0.018369	0.651258	0.989826	2608	-0.00566	0.018985	0.765755	0.987198	2559	-0.00986	0.019005	0.603987	0.983584
Rectal cancer	Acetate	4760	-0.00632	0.0146	0.665035	0.999758	2925	-0.0109	0.018953	0.5652	0.995226	2608	0.004349	0.018808	0.817163	0.98792	2559	-0.01453	0.019286	0.451279	0.983658
Colorectal cancer	Acetate	4760	-0.01625	0.014385	0.258806	0.476377	2925	-0.01114	0.018316	0.543021	0.63606	2608	-0.01095	0.018853	0.561352	0.679531	2559	0.009758	0.019463	0.616146	0.989619
Proximal colon cancer	Acetoacetate	4755	0.037879	0.014587	0.009439	0.72363	2927	-0.01406	0.018556	0.44874	0.847846	2610	-0.0014	0.018868	0.94084	0.961747	2559	-0.01988	0.01826	0.276306	0.970622
Colon cancer	Acetoacetate	4755	0.012477	0.014324	0.383758	0.892672	2927	-0.03098	0.019361	0.109646	0.655485	2610	-0.00102	0.019669	0.958762	0.975731	2559	-0.0089	0.01878	0.635757	0.972717
Distal colon cancer	Acetoacetate	4755	-0.00501	0.014748	0.734175	0.998606	2927	0.009072	0.018079	0.615846	0.989826	2610	0.040674	0.019142	0.033695	0.821788	2559	-0.00115	0.019165	0.952208	0.983584
Rectal cancer	Acetoacetate	4755	0.005677	0.014703	0.699417	0.999758	2927	0.004131	0.019281	0.830377	0.995226	2610	0.024771	0.019149	0.195917	0.98792	2559	0.012266	0.019913	0.537967	0.983658
Colorectal cancer	Acetoacetate	4755	0.015223	0.014152	0.282135	0.499162	2927	-0.03482	0.018614	0.061509	0.199253	2610	-0.00095	0.018697	0.959499	0.979342	2559	-0.00047	0.01877	0.980174	0.989619
Distal colon cancer	Alanine	4759	0.018495	0.014249	0.194354	0.998606	2927	-0.0123	0.018438	0.504772	0.989826	2610	0.027905	0.018376	0.128991	0.821788	2559	0.028201	0.01915	0.140966	0.777602
Colon cancer	Alanine	4759	0.001946	0.014319	0.891927	0.997663	2927	0.00964	0.019009	0.612094	0.779442	2610	0.037281	0.018422	0.043096	0.139608	2559	0.026797	0.018696	0.151893	0.793982
Proximal colon cancer	Alanine	4759	-0.02417	0.014391	0.093072	0.901214	2927	0.008438	0.018415	0.646847	0.880325	2610	0.020885	0.018409	0.256699	0.396247	2559	0.013385	0.019031	0.481915	0.970622
Rectal cancer	Alanine	4759	-0.00325	0.014639	0.824407	0.999758	2927	-0.01169	0.01864	0.530687	0.995226	2610	0.008803	0.018783	0.639335	0.98792	2559	0.001599	0.019852	0.935804	0.983658
Colorectal cancer	Alanine	4759	0.013137	0.014423	0.362405	0.570912	2927	0.003079	0.018702	0.869225	0.908735	2610	0.02156	0.01833	0.239626	0.380822	2559	-0.02076	0.019509	0.28744	0.989619
Proximal colon cancer	Albumin	4751	0.017687	0.014477	0.221864	0.901214	2927	0.017677	0.018635	0.342907	0.779185	2611	-0.01899	0.01881	0.312839	0.447073	2559	0.007884	0.018345	0.667389	0.970622
Colon cancer	Albumin	4751	0.029881	0.014102	0.034144	0.733164	2927	0.032087	0.018321	0.07999	0.655485	2611	0.0005	0.018328	0.978225	0.987508	2559	0.005845	0.019029	0.758722	0.972717
Distal colon cancer	Albumin	4751	0.018686	0.013964	0.180887	0.998606	2927	-0.00332	0.018615	0.858384	0.989826	2611	0.001766	0.017851	0.92121	0.987198	2559	-0.00602	0.018638	0.74677	0.983584
Rectal cancer	Albumin	4751	0.017325	0.01427	0.224769	0.999758	2927	-0.01808	0.018594	0.330989	0.995226	2611	-0.00652	0.018294	0.72141	0.98792	2559	0.002803	0.018582	0.880103	0.983658
Colorectal cancer	Albumin	4751	0.018577	0.014106	0.1879	0.445308	2927	0.030777	0.018206	0.091048	0.246366	2611	0.034246	0.017854	0.055205	0.167068	2559	-0.00283	0.018384	0.877683	0.989619
Distal colon cancer	Apolipoprotein A1	4758	0.010944	0.014305	0.444265	0.998606	2927	-0.00393	0.016616	0.812859	0.989826	2611	-0.00102	0.016683	0.951162	0.987198	2559	0.042906	0.018002	0.017229	0.341475
Colon cancer	Apolipoprotein A1	4758	0.024477	0.014346	0.088048	0.892672	2927	0.009426	0.017667	0.593731	0.775898	2611	0.033982	0.017456	0.051675	0.165072	2559	0.026366	0.018153	0.1465	0.793982
Proximal colon cancer	Apolipoprotein A1	4758	-0.00308	0.014368	0.830475	0.901214	2927	0.013199	0.016936	0.435829	0.847846	2611	0.006083	0.016317	0.709322	0.788136	2559	0.005924	0.017366	0.733051	0.970622
Rectal cancer	Apolipoprotein A1	4758	0.00118	0.014664	0.935868	0.999758	2927	-0.00233	0.018168	0.897867	0.995226	2611	0.006804	0.016947	0.688069	0.98792	2559	0.028239	0.018345	0.123843	0.983658
Colorectal cancer	Apolipoprotein A1	4758	0.018152	0.013961	0.193612	0.445308	2927	0.004723	0.017324	0.785162	0.855863	2611	0.011046	0.0164	0.500673	0.615801	2559	0.001289	0.017598	0.941597	0.989619
Proximal colon cancer	Apolipoprotein B	4758	0.013487	0.014697	0.358845	0.901214	2927	0.012422	0.018057	0.491533	0.85646	2611	0.043518	0.01915	0.023139	0.1221	2559	0.015543	0.020087	0.43914	0.970622
Colon cancer	Apolipoprotein B	4758	0.005102	0.014254	0.720404	0.997663	2927	-0.00207	0.018171	0.909257	0.946348	2611	0.042145	0.019313	0.029187	0.110048	2559	-0.00894	0.019943	0.654075	0.972717
Distal colon cancer	Apolipoprotein B	4758	0.003897	0.013982	0.780466	0.998606	2927	-0.00422	0.018394	0.818628	0.989826	2611	0.015461	0.018682	0.407963	0.87548	2559	-0.00371	0.020014	0.853128	0.983584
Colorectal cancer	Apolipoprotein B	4758	0.022328	0.013988	0.110491	0.445308	2927	0.047708	0.018223	0.008891	0.077097	2611	0.054655	0.018944	0.003945	0.021396	2559	0.003216	0.019679	0.870178	0.989619
Rectal cancer	Apolipoprotein B	4758	0.000191	0.01412	0.989224	0.999758	2927	0.017184	0.018724	0.358812	0.995226	2611	0.007262	0.01972	0.712729	0.98792	2559	-0.00019	0.020512	0.992707	0.997179
Colon cancer	Average diameter for HDL particles	4758	0.013719	0.014281	0.336781	0.892672	2927	0.028034	0.018147	0.122497	0.655485	2611	0.023092	0.018656	0.21591	0.379695	2559	0.043921	0.017798	0.013661	0.524453
Distal colon cancer	Average diameter for HDL particles	4758	-0.00029	0.014264	0.983602	0.998606	2927	-0.00095	0.017495	0.956493	0.989826	2611	-0.01731	0.017708	0.328464	0.860196	2559	0.029013	0.017333	0.094279	0.756629
Rectal cancer	Average diameter for HDL particles	4758	-0.0017	0.014363	0.905599	0.999758	2927	0.004268	0.018432	0.816905	0.995226	2611	0.007314	0.018337	0.690022	0.98792	2559	0.023885	0.017674	0.176683	0.983658
Colorectal cancer	Average diameter for HDL particles	4758	0.006255	0.014192	0.65939	0.815292	2927	0.002166	0.017566	0.901877	0.930187	2611	-0.01175	0.017742	0.507762	0.621198	2559	0.003447	0.017547	0.844265	0.989619
Proximal colon cancer	Average diameter for HDL particles	4758	-0.02673	0.014143	0.0588	0.901214	2927	0.008313	0.017666	0.638007	0.880325	2611	-0.02155	0.017236	0.2113	0.347137	2559	0.000688	0.017221	0.968112	0.993758
Distal colon cancer	Average diameter for LDL particles	4758	-0.0108	0.014752	0.46397	0.998606	2927	0.006016	0.018109	0.739742	0.989826	2611	-0.01737	0.018618	0.351038	0.860196	2559	-0.01728	0.018427	0.348565	0.953558
Colon cancer	Average diameter for LDL particles	4758	-0.00227	0.014591	0.876522	0.997663	2927	0.02603	0.01833	0.155696	0.655485	2611	-0.02393	0.018738	0.201749	0.374212	2559	0.005785	0.019033	0.76121	0.972717
Rectal cancer	Average diameter for LDL particles	4758	-0.0017	0.014683	0.907994	0.999758	2927	0.002665	0.018502	0.885465	0.995226	2611	-0.00401	0.019091	0.833757	0.98792	2559	0.007042	0.018523	0.703846	0.983658
Colorectal cancer	Average diameter for LDL particles	4758	-0.01181	0.014119	0.402862	0.60561	2927	-0.00876	0.0181	0.628331	0.717726	2611	-0.02142	0.01862	0.250018	0.380822	2559	-0.00492	0.019509	0.801085	0.989619
Proximal colon cancer	Average diameter for LDL particles	4758	-0.02386	0.014799	0.106909	0.901214	2927	-0.00572	0.017896	0.749254	0.917029	2611	-0.04083	0.01789	0.022563	0.1221	2559	0.00046	0.018719	0.980389	0.993758
Colon cancer	Average diameter for VLDL particles	4758	-0.00379	0.0143	0.790728	0.997663	2927	-0.02658	0.019013	0.162215	0.655485	2611	0.007086	0.018941	0.708362	0.786698	2559	-0.03292	0.018939	0.0823	0.655464
Proximal colon cancer	Average diameter for VLDL particles	4758	0.004041	0.014255	0.776789	0.901214	2927	-0.02082	0.018338	0.256371	0.716767	2611	0.02047	0.018281	0.262923	0.400479	2559	0.003977	0.018561	0.830359	0.974427
Distal colon cancer	Average diameter for VLDL particles	4758	0.006853	0.0143	0.631787	0.998606	2927	-0.01151	0.018192	0.527016	0.989826	2611	0.030227	0.01834	0.099449	0.821788	2559	-0.00369	0.019428	0.849251	0.983584
Rectal cancer	Average diameter for VLDL particles	4758	8.13e-05	0.014235	0.995445	0.999758	2927	-0.00356	0.018846	0.850159	0.995226	2611	0.006946	0.01952	0.721974	0.98792	2559	-0.02109	0.019218	0.272476	0.983658
Colorectal cancer	Average diameter for VLDL particles	4758	0.017609	0.014205	0.215164	0.449888	2927	0.011769	0.018267	0.519433	0.63606	2611	0.009051	0.01833	0.62149	0.721933	2559	-0.02211	0.018544	0.233254	0.989619
Proximal colon cancer	Cholesterol in chylomicrons and extremely large VLDL	4758	0.006236	0.014404	0.665095	0.901214	2927	-0.00218	0.018272	0.905129	0.981265	2611	0.02892	0.019028	0.128676	0.267216	2559	0.007144	0.019518	0.714382	0.970622
Colon cancer	Cholesterol in chylomicrons and extremely large VLDL	4758	0.00432	0.014254	0.761863	0.997663	2927	-0.01582	0.018559	0.394088	0.66508	2611	0.02718	0.019119	0.155254	0.330634	2559	-0.00916	0.019183	0.633041	0.972717
Distal colon cancer	Cholesterol in chylomicrons and extremely large VLDL	4758	0.008863	0.014072	0.528833	0.998606	2927	-0.00813	0.01863	0.662558	0.989826	2611	0.028412	0.018896	0.132801	0.821788	2559	-0.00788	0.019945	0.692792	0.983584
Rectal cancer	Cholesterol in chylomicrons and extremely large VLDL	4758	0.005394	0.01414	0.702842	0.999758	2927	0.003865	0.019168	0.840194	0.995226	2611	0.004043	0.019821	0.838382	0.98792	2559	0.000796	0.020461	0.968977	0.989472
Colorectal cancer	Cholesterol in chylomicrons and extremely large VLDL	4758	0.024484	0.014051	0.081482	0.445308	2927	0.027205	0.018512	0.141778	0.310342	2611	0.020908	0.019038	0.27222	0.393397	2559	-0.01378	0.01925	0.474034	0.989619
Proximal colon cancer	Cholesterol in IDL	4758	0.014115	0.014793	0.340025	0.901214	2927	0.026089	0.017636	0.139178	0.716767	2611	0.040061	0.018859	0.033743	0.13508	2559	0.016609	0.019969	0.405651	0.970622
Colon cancer	Cholesterol in IDL	4758	0.017202	0.014213	0.226203	0.892672	2927	0.024098	0.018072	0.182476	0.655485	2611	0.041767	0.019282	0.030392	0.111583	2559	0.004322	0.020073	0.829536	0.972717
Distal colon cancer	Cholesterol in IDL	4758	0.003996	0.014081	0.776587	0.998606	2927	0.008172	0.017747	0.645231	0.989826	2611	-0.00289	0.018743	0.877513	0.987198	2559	-0.00492	0.019956	0.805356	0.983584
Rectal cancer	Cholesterol in IDL	4758	0.004846	0.014433	0.737036	0.999758	2927	0.022433	0.018031	0.213549	0.995226	2611	0.001373	0.019366	0.943465	0.98792	2559	0.004366	0.020433	0.830823	0.983658
Colorectal cancer	Cholesterol in IDL	4758	0.024015	0.014261	0.092261	0.445308	2927	0.051766	0.017917	0.003891	0.049719	2611	0.059463	0.019017	0.001787	0.021396	2559	0.011391	0.019492	0.558985	0.989619
Distal colon cancer	Cholesterol in large HDL	4758	0.004175	0.014136	0.767742	0.998606	2927	-0.00225	0.017717	0.899141	0.989826	2611	-0.01756	0.017376	0.312418	0.860196	2559	0.035464	0.01736	0.041173	0.49586
Colon cancer	Cholesterol in large HDL	4758	0.016061	0.014316	0.26198	0.892672	2927	0.021027	0.018318	0.251124	0.655485	2611	0.010281	0.018414	0.576651	0.676683	2559	0.039536	0.017556	0.024406	0.524453
Rectal cancer	Cholesterol in large HDL	4758	0.000746	0.014371	0.958628	0.999758	2927	-0.00199	0.018712	0.915271	0.995226	2611	0.003228	0.017882	0.856749	0.98792	2559	0.024375	0.017655	0.167526	0.983658
Colorectal cancer	Cholesterol in large HDL	4758	0.004446	0.01416	0.753564	0.875352	2927	-0.01598	0.017669	0.365846	0.522636	2611	-0.02198	0.017006	0.196327	0.359791	2559	-0.00197	0.017192	0.908769	0.989619
Proximal colon cancer	Cholesterol in large HDL	4758	-0.02087	0.014054	0.137566	0.901214	2927	0.005086	0.017752	0.774517	0.917029	2611	-0.02718	0.017031	0.110656	0.255223	2559	-0.00068	0.01681	0.967877	0.993758
Proximal colon cancer	Cholesterol in large LDL	4758	0.010869	0.014739	0.460919	0.901214	2927	0.022353	0.017417	0.199447	0.716767	2611	0.044382	0.018286	0.015288	0.1221	2559	0.014767	0.020127	0.463214	0.970622
Colon cancer	Cholesterol in large LDL	4758	0.014148	0.014192	0.318877	0.892672	2927	0.01999	0.017781	0.260988	0.655485	2611	0.045816	0.018662	0.014152	0.074972	2559	0.004323	0.020062	0.82941	0.972717
Distal colon cancer	Cholesterol in large LDL	4758	2.5e-05	0.014285	0.998606	0.998606	2927	0.006782	0.017403	0.696781	0.989826	2611	0.001825	0.018123	0.919818	0.987198	2559	-0.0017	0.019897	0.931871	0.983584
Rectal cancer	Cholesterol in large LDL	4758	0.00231	0.014469	0.873138	0.999758	2927	0.020262	0.017757	0.253925	0.995226	2611	0.003044	0.018741	0.870984	0.98792	2559	0.005631	0.020357	0.782097	0.983658
Colorectal cancer	Cholesterol in large LDL	4758	0.020284	0.014023	0.148111	0.445308	2927	0.042609	0.017701	0.016137	0.093313	2611	0.055796	0.018554	0.002662	0.021396	2559	0.014563	0.019558	0.456579	0.989619
Colon cancer	Cholesterol in large VLDL	4758	0.001711	0.014257	0.904468	0.997663	2927	-0.02114	0.018685	0.257937	0.655485	2611	0.020266	0.019085	0.288364	0.448134	2559	-0.02121	0.019473	0.276264	0.89786
Proximal colon cancer	Cholesterol in large VLDL	4758	0.005929	0.014364	0.679826	0.901214	2927	-0.00775	0.018318	0.672245	0.898933	2611	0.028899	0.018906	0.126487	0.2669	2559	0.006582	0.019145	0.731031	0.970622
Distal colon cancer	Cholesterol in large VLDL	4758	0.010631	0.014052	0.449364	0.998606	2927	-0.01276	0.018435	0.488883	0.989826	2611	0.026761	0.018692	0.152365	0.821788	2559	-0.00978	0.02016	0.627795	0.983584
Rectal cancer	Cholesterol in large VLDL	4758	0.003601	0.014078	0.798102	0.999758	2927	0.00553	0.018993	0.770956	0.995226	2611	0.00681	0.019796	0.730857	0.98792	2559	-0.00573	0.02005	0.775156	0.983658
Colorectal cancer	Cholesterol in large VLDL	4758	0.024757	0.014062	0.078383	0.445308	2927	0.024438	0.018435	0.18508	0.337845	2611	0.022589	0.018706	0.227336	0.376168	2559	-0.0122	0.019428	0.530141	0.989619
Distal colon cancer	Cholesterol in medium HDL	4758	0.024696	0.014241	0.082966	0.998606	2927	-0.00053	0.017531	0.975748	0.989826	2611	-0.00488	0.017541	0.781065	0.987198	2559	0.047241	0.018541	0.010895	0.312786
Colon cancer	Cholesterol in medium HDL	4758	0.032348	0.014695	0.02777	0.733164	2927	0.005464	0.018205	0.764113	0.87873	2611	-0.00045	0.018274	0.980462	0.987508	2559	0.013735	0.018557	0.459266	0.956657
Proximal colon cancer	Cholesterol in medium HDL	4758	0.009859	0.014689	0.502119	0.901214	2927	0.011875	0.017929	0.507824	0.867347	2611	-0.00809	0.01777	0.64905	0.753946	2559	0.008202	0.018271	0.653546	0.970622
Rectal cancer	Cholesterol in medium HDL	4758	0.012128	0.014571	0.405267	0.999758	2927	-0.01428	0.018408	0.43791	0.995226	2611	0.000527	0.017348	0.975774	0.98792	2559	0.020941	0.018844	0.266567	0.983658
Colorectal cancer	Cholesterol in medium HDL	4758	0.014588	0.014395	0.310937	0.518667	2927	-0.01069	0.017965	0.551764	0.640938	2611	-0.00838	0.016885	0.619621	0.721933	2559	-0.01112	0.01814	0.540089	0.989619
Proximal colon cancer	Cholesterol in medium LDL	4758	0.010479	0.014784	0.478481	0.901214	2927	0.021518	0.017442	0.217422	0.716767	2611	0.047295	0.018318	0.009878	0.118838	2559	0.0118	0.020112	0.557435	0.970622
Colon cancer	Cholesterol in medium LDL	4758	0.012393	0.014259	0.384845	0.892672	2927	0.016977	0.017817	0.34075	0.655485	2611	0.046513	0.018698	0.012923	0.074602	2559	0.002558	0.019997	0.898234	0.972717
Distal colon cancer	Cholesterol in medium LDL	4758	-0.00111	0.014362	0.938623	0.998606	2927	0.00665	0.017451	0.703183	0.989826	2611	0.003435	0.018096	0.849484	0.987198	2559	-0.00082	0.019729	0.966984	0.983584
Rectal cancer	Cholesterol in medium LDL	4758	0.000575	0.014476	0.968341	0.999758	2927	0.019963	0.017759	0.261075	0.995226	2611	0.004053	0.018745	0.828847	0.98792	2559	0.004151	0.020141	0.836735	0.983658
Colorectal cancer	Cholesterol in medium LDL	4758	0.019239	0.013975	0.168688	0.445308	2927	0.042527	0.017744	0.016605	0.093313	2611	0.057531	0.018568	0.001967	0.021396	2559	0.016434	0.019657	0.403231	0.989619
Colon cancer	Cholesterol in medium VLDL	4758	0.006997	0.014284	0.624275	0.985666	2927	-0.01448	0.018614	0.436728	0.680072	2611	0.024038	0.019065	0.207464	0.378704	2559	-0.0197	0.019625	0.315467	0.89786
Proximal colon cancer	Cholesterol in medium VLDL	4758	0.008589	0.014401	0.55092	0.901214	2927	0.001727	0.018339	0.92499	0.981265	2611	0.029917	0.019022	0.115905	0.258817	2559	0.014189	0.019555	0.468156	0.970622
Distal colon cancer	Cholesterol in medium VLDL	4758	0.017321	0.013957	0.21467	0.998606	2927	-0.00979	0.018492	0.596592	0.989826	2611	0.019075	0.018706	0.30796	0.860196	2559	-0.0074	0.020074	0.712387	0.983584
Rectal cancer	Cholesterol in medium VLDL	4758	0.007437	0.014095	0.597784	0.999758	2927	0.013058	0.019078	0.493735	0.995226	2611	0.008216	0.019763	0.677632	0.98792	2559	-0.01259	0.02028	0.534705	0.983658
Colorectal cancer	Cholesterol in medium VLDL	4758	0.029373	0.014018	0.036187	0.445308	2927	0.033747	0.018358	0.066123	0.206961	2611	0.031735	0.018664	0.089185	0.231665	2559	-0.01427	0.019467	0.463744	0.989619
Colon cancer	Cholesterol in small HDL	4758	0.027824	0.014598	0.056701	0.892672	2927	0.000568	0.017724	0.974459	0.984556	2611	0.023374	0.016562	0.158287	0.334	2559	-0.01909	0.019704	0.332609	0.89786
Distal colon cancer	Cholesterol in small HDL	4758	0.018956	0.014309	0.185306	0.998606	2927	0.011107	0.01679	0.508325	0.989826	2611	0.003914	0.015971	0.806449	0.987198	2559	0.018276	0.019376	0.345654	0.953558
Proximal colon cancer	Cholesterol in small HDL	4758	0.020269	0.014763	0.169819	0.901214	2927	0.021933	0.016847	0.193056	0.716767	2611	0.030738	0.015888	0.053143	0.163782	2559	0.009829	0.019387	0.612198	0.970622
Rectal cancer	Cholesterol in small HDL	4758	0.019882	0.014393	0.167214	0.999758	2927	0.008093	0.017632	0.646278	0.995226	2611	0.003552	0.016648	0.831059	0.98792	2559	-0.00442	0.019932	0.824483	0.983658
Colorectal cancer	Cholesterol in small HDL	4758	0.015899	0.014203	0.263043	0.476377	2927	-0.02633	0.017221	0.12632	0.299523	2611	0.017393	0.015487	0.26152	0.385765	2559	-0.00342	0.019195	0.858705	0.989619
Proximal colon cancer	Cholesterol in small LDL	4758	0.012106	0.014784	0.412903	0.901214	2927	0.02196	0.017539	0.210642	0.716767	2611	0.048329	0.018381	0.008606	0.118838	2559	0.010378	0.020057	0.604929	0.970622
Colon cancer	Cholesterol in small LDL	4758	0.012554	0.014311	0.380422	0.892672	2927	0.016408	0.017884	0.35896	0.655485	2611	0.046386	0.018688	0.013123	0.074602	2559	0.002758	0.019978	0.890198	0.972717
Rectal cancer	Cholesterol in small LDL	4758	-0.00034	0.014499	0.981204	0.999758	2927	0.019569	0.017763	0.270694	0.995226	2611	0.003521	0.018772	0.851247	0.98792	2559	0.004607	0.020059	0.818364	0.983658
Colorectal cancer	Cholesterol in small LDL	4758	0.018565	0.013987	0.184455	0.445308	2927	0.042649	0.017843	0.016902	0.093313	2611	0.05735	0.018684	0.002166	0.021396	2559	0.016622	0.019714	0.399206	0.989619
Distal colon cancer	Cholesterol in small LDL	4758	-0.00104	0.014386	0.942644	0.998606	2927	0.006974	0.017439	0.689235	0.989826	2611	0.002882	0.018112	0.873574	0.987198	2559	-0.00018	0.019693	0.992873	0.996308
Colon cancer	Cholesterol in small VLDL	4758	0.00574	0.014411	0.690403	0.997663	2927	-0.00405	0.018213	0.82424	0.911419	2611	0.03558	0.019287	0.065184	0.192353	2559	-0.01548	0.01968	0.431638	0.917839
Proximal colon cancer	Cholesterol in small VLDL	4758	0.020463	0.014553	0.159747	0.901214	2927	0.017324	0.018417	0.34695	0.779185	2611	0.045795	0.019359	0.018077	0.1221	2559	0.01953	0.019865	0.325647	0.970622
Distal colon cancer	Cholesterol in small VLDL	4758	0.006801	0.013888	0.624354	0.998606	2927	3.09e-05	0.018446	0.998664	0.998664	2611	0.01137	0.018495	0.538775	0.924763	2559	-0.00787	0.019837	0.691506	0.983584
Rectal cancer	Cholesterol in small VLDL	4758	0.001295	0.014135	0.927002	0.999758	2927	0.016192	0.018966	0.393304	0.995226	2611	0.004012	0.019472	0.836755	0.98792	2559	-0.00428	0.02021	0.83244	0.983658
Colorectal cancer	Cholesterol in small VLDL	4758	0.019986	0.014065	0.155385	0.445308	2927	0.050763	0.018255	0.005456	0.05976	2611	0.053015	0.018901	0.005071	0.024088	2559	-0.00272	0.019301	0.887868	0.989619
Colon cancer	Cholesterol in very large HDL	4758	0.004574	0.014017	0.744189	0.997663	2927	0.016621	0.018456	0.36788	0.655485	2611	0.034229	0.019125	0.073612	0.206473	2559	0.032362	0.018455	0.079619	0.655464
Distal colon cancer	Cholesterol in very large HDL	4758	-0.00867	0.014353	0.546013	0.998606	2927	-0.00951	0.01716	0.579392	0.989826	2611	-0.01349	0.018184	0.458301	0.887047	2559	0.021379	0.017714	0.227584	0.860191
Proximal colon cancer	Cholesterol in very large HDL	4758	-0.01147	0.014191	0.419081	0.901214	2927	0.010011	0.017936	0.576788	0.870598	2611	-0.00811	0.01854	0.662018	0.759001	2559	-0.00466	0.017332	0.78827	0.970622
Rectal cancer	Cholesterol in very large HDL	4758	-0.01171	0.014486	0.418898	0.999758	2927	-0.00254	0.018603	0.891467	0.995226	2611	-0.00348	0.018527	0.851022	0.98792	2559	0.025013	0.017816	0.160443	0.983658
Colorectal cancer	Cholesterol in very large HDL	4758	0.001448	0.013802	0.916472	0.96692	2927	0.011411	0.017751	0.520379	0.63606	2611	-0.00284	0.018399	0.87715	0.93548	2559	0.010287	0.018024	0.568231	0.989619
Colon cancer	Cholesterol in very large VLDL	4758	0.001172	0.014252	0.934486	0.997663	2927	-0.01785	0.018604	0.337503	0.655485	2611	0.023313	0.019078	0.221826	0.386515	2559	-0.01582	0.018973	0.404484	0.89786
Distal colon cancer	Cholesterol in very large VLDL	4758	0.007123	0.014158	0.614896	0.998606	2927	-0.00989	0.018517	0.593431	0.989826	2611	0.027487	0.018887	0.14569	0.821788	2559	-0.01132	0.019654	0.564731	0.983584
Rectal cancer	Cholesterol in very large VLDL	4758	0.003009	0.014138	0.831477	0.999758	2927	0.002868	0.019087	0.880585	0.995226	2611	0.002496	0.019765	0.899524	0.98792	2559	-0.00286	0.020134	0.887002	0.983658
Colorectal cancer	Cholesterol in very large VLDL	4758	0.021742	0.014057	0.122003	0.445308	2927	0.029255	0.018543	0.114734	0.283751	2611	0.024508	0.018996	0.197103	0.359791	2559	-0.01839	0.018932	0.331354	0.989619
Proximal colon cancer	Cholesterol in very large VLDL	4758	0.006813	0.014358	0.635144	0.901214	2927	-0.00664	0.018254	0.716111	0.917029	2611	0.028997	0.018919	0.125471	0.2669	2559	-0.002	0.0193	0.917381	0.993758
Distal colon cancer	Cholesterol in very small VLDL	4758	0.005614	0.01413	0.691178	0.998606	2927	0.012849	0.018431	0.485785	0.989826	2611	-0.00836	0.018939	0.658929	0.987198	2559	-0.02055	0.019895	0.301617	0.928506
Proximal colon cancer	Cholesterol in very small VLDL	4758	0.016523	0.01484	0.26559	0.901214	2927	0.032352	0.018244	0.076281	0.716767	2611	0.035858	0.019636	0.067947	0.186044	2559	0.017081	0.020076	0.394942	0.970622
Colon cancer	Cholesterol in very small VLDL	4758	0.014314	0.014434	0.321404	0.892672	2927	0.022596	0.018794	0.229339	0.655485	2611	0.030042	0.019565	0.124776	0.294775	2559	-0.00638	0.020039	0.750243	0.972717
Rectal cancer	Cholesterol in very small VLDL	4758	-0.0002	0.014507	0.989084	0.999758	2927	0.026683	0.018376	0.146603	0.995226	2611	0.000582	0.019673	0.976396	0.98792	2559	-0.0012	0.020535	0.953591	0.983658
Colorectal cancer	Cholesterol in very small VLDL	4758	0.018532	0.014563	0.203254	0.449888	2927	0.063809	0.018282	0.00049	0.032982	2611	0.062825	0.019228	0.0011	0.021396	2559	0.007124	0.019591	0.716173	0.989619
Proximal colon cancer	Cholesterol to total lipids ratio in chylomicrons and extremely large VLDL	4758	0.006637	0.014354	0.643835	0.901214	2927	0.017095	0.01795	0.340992	0.779185	2611	0.018843	0.018396	0.305792	0.44514	2559	0.004994	0.019521	0.798127	0.970622
Colon cancer	Cholesterol to total lipids ratio in chylomicrons and extremely large VLDL	4758	0.030974	0.013999	0.026977	0.733164	2927	-0.00175	0.017762	0.921541	0.950469	2611	0.023639	0.018344	0.19763	0.374212	2559	-0.00521	0.019305	0.787375	0.972717
Distal colon cancer	Cholesterol to total lipids ratio in chylomicrons and extremely large VLDL	4758	0.02855	0.014297	0.045898	0.998606	2927	0.003047	0.018305	0.867814	0.989826	2611	0.014501	0.018547	0.434382	0.883142	2559	-0.00963	0.019452	0.620472	0.983584
Rectal cancer	Cholesterol to total lipids ratio in chylomicrons and extremely large VLDL	4758	0.032172	0.014373	0.025242	0.999758	2927	0.01713	0.018516	0.354954	0.995226	2611	0.012612	0.019252	0.512453	0.98792	2559	0.01007	0.019559	0.6067	0.983658
Colorectal cancer	Cholesterol to total lipids ratio in chylomicrons and extremely large VLDL	4758	0.03256	0.013773	0.018115	0.445308	2927	0.01324	0.018188	0.466718	0.59581	2611	0.00318	0.019307	0.869197	0.93548	2559	-0.01143	0.019372	0.555207	0.989619
Distal colon cancer	Cholesterol to total lipids ratio in IDL	4758	0.016017	0.014483	0.268807	0.998606	2927	0.017291	0.018784	0.357383	0.989826	2611	-0.0205	0.018715	0.273474	0.860196	2559	-0.02026	0.019179	0.290913	0.928506
Proximal colon cancer	Cholesterol to total lipids ratio in IDL	4758	0.029763	0.015036	0.047819	0.901214	2927	0.028631	0.018283	0.117456	0.716767	2611	0.010787	0.018803	0.566239	0.685448	2559	0.004969	0.019408	0.797944	0.970622
Colon cancer	Cholesterol to total lipids ratio in IDL	4758	0.019344	0.014518	0.182781	0.892672	2927	0.030195	0.019855	0.128436	0.655485	2611	-0.00169	0.019201	0.930064	0.954977	2559	-0.01022	0.019873	0.607036	0.972717
Rectal cancer	Cholesterol to total lipids ratio in IDL	4758	0.007987	0.014473	0.58109	0.999758	2927	0.019049	0.01874	0.309492	0.995226	2611	-0.01332	0.019356	0.491508	0.98792	2559	-0.01832	0.019871	0.356748	0.983658
Colorectal cancer	Cholesterol to total lipids ratio in IDL	4758	0.01672	0.014812	0.259027	0.476377	2927	0.064396	0.018404	0.000474	0.032982	2611	0.036801	0.01847	0.046422	0.144286	2559	0.011974	0.019858	0.546569	0.989619
Colon cancer	Cholesterol to total lipids ratio in large HDL	4758	0.001921	0.014277	0.892967	0.997663	2927	0.014254	0.018547	0.442224	0.680072	2611	-0.01738	0.01942	0.370999	0.499004	2559	0.034057	0.018595	0.067143	0.650998
Proximal colon cancer	Cholesterol to total lipids ratio in large HDL	4758	-0.01862	0.014276	0.192267	0.901214	2927	-0.00894	0.018128	0.622091	0.880325	2611	-0.05019	0.018389	0.006383	0.118838	2559	-0.01252	0.018396	0.496235	0.970622
Distal colon cancer	Cholesterol to total lipids ratio in large HDL	4758	0.003151	0.014224	0.824722	0.998606	2927	-0.00173	0.018399	0.925074	0.989826	2611	-0.01929	0.018777	0.304441	0.860196	2559	0.014942	0.018277	0.413697	0.983584
Rectal cancer	Cholesterol to total lipids ratio in large HDL	4758	-0.00312	0.014199	0.826058	0.999758	2927	-0.00409	0.018711	0.826935	0.995226	2611	-0.00362	0.019535	0.853039	0.98792	2559	0.010579	0.018512	0.567725	0.983658
Colorectal cancer	Cholesterol to total lipids ratio in large HDL	4758	-0.00573	0.014214	0.686905	0.818592	2927	-0.01916	0.018003	0.287368	0.444908	2611	-0.04652	0.01898	0.014316	0.053979	2559	0.001584	0.01841	0.931457	0.989619
Proximal colon cancer	Cholesterol to total lipids ratio in large LDL	4758	0.022554	0.014871	0.129431	0.901214	2927	0.027351	0.018221	0.133448	0.716767	2611	0.032367	0.019547	0.097863	0.247345	2559	0.009903	0.019521	0.61198	0.970622
Colon cancer	Cholesterol to total lipids ratio in large LDL	4758	0.022239	0.014354	0.121379	0.892672	2927	0.032458	0.018988	0.087488	0.655485	2611	0.022191	0.019991	0.267084	0.43973	2559	-0.00905	0.019608	0.644574	0.972717
Distal colon cancer	Cholesterol to total lipids ratio in large LDL	4758	0.012142	0.014162	0.39127	0.998606	2927	0.016568	0.018262	0.364358	0.989826	2611	-0.01021	0.019195	0.59483	0.953302	2559	-0.01619	0.019024	0.394856	0.983584
Rectal cancer	Cholesterol to total lipids ratio in large LDL	4758	0.008306	0.014463	0.565777	0.999758	2927	0.024116	0.018412	0.190362	0.995226	2611	-0.00433	0.020136	0.829569	0.98792	2559	-0.01705	0.019683	0.386467	0.983658
Colorectal cancer	Cholesterol to total lipids ratio in large LDL	4758	0.022294	0.014623	0.127444	0.445308	2927	0.061003	0.018659	0.00109	0.032982	2611	0.055445	0.019841	0.005237	0.024088	2559	0.016293	0.019523	0.40404	0.989619
Proximal colon cancer	Cholesterol to total lipids ratio in large VLDL	4758	0.016697	0.01427	0.242019	0.901214	2927	0.00147	0.017842	0.934335	0.981265	2611	0.020463	0.018925	0.279685	0.417711	2559	0.009714	0.01922	0.613338	0.970622
Distal colon cancer	Cholesterol to total lipids ratio in large VLDL	4758	0.020377	0.01419	0.151042	0.998606	2927	-0.014	0.017663	0.428156	0.989826	2611	0.004794	0.018353	0.793972	0.987198	2559	-0.01434	0.019794	0.468927	0.983584
Rectal cancer	Cholesterol to total lipids ratio in large VLDL	4758	0.02912	0.014312	0.041936	0.999758	2927	0.016756	0.018645	0.368875	0.995226	2611	0.007104	0.019567	0.716567	0.98792	2559	-0.00133	0.019796	0.946522	0.983658
Colon cancer	Cholesterol to total lipids ratio in large VLDL	4758	0.027128	0.014072	0.053939	0.892672	2927	-0.01896	0.017928	0.290239	0.655485	2611	0.00559	0.018964	0.768177	0.829487	2559	-0.00108	0.019515	0.95586	0.986837
Colorectal cancer	Cholesterol to total lipids ratio in large VLDL	4758	0.023574	0.013993	0.092124	0.445308	2927	0.025746	0.017979	0.152252	0.310342	2611	0.014556	0.018984	0.443295	0.563303	2559	-0.00079	0.019526	0.967847	0.989619
Distal colon cancer	Cholesterol to total lipids ratio in medium HDL	4758	0.000216	0.014006	0.987721	0.998606	2927	-0.00189	0.018693	0.91952	0.989826	2611	-0.00657	0.017638	0.709633	0.987198	2559	0.019722	0.019476	0.311325	0.928506
Proximal colon cancer	Cholesterol to total lipids ratio in medium HDL	4758	-0.00136	0.014709	0.926568	0.951387	2927	-0.01996	0.018363	0.277164	0.716767	2611	-0.03953	0.018378	0.031579	0.13508	2559	-0.01156	0.019294	0.549234	0.970622
Colon cancer	Cholesterol to total lipids ratio in medium HDL	4758	-0.00266	0.01426	0.852166	0.997663	2927	0.004214	0.018505	0.819882	0.911419	2611	-0.04498	0.017967	0.01235	0.074602	2559	0.003291	0.019658	0.867041	0.972717
Rectal cancer	Cholesterol to total lipids ratio in medium HDL	4758	-0.01368	0.013963	0.327432	0.999758	2927	-0.01044	0.018486	0.57229	0.995226	2611	-0.00633	0.01829	0.72935	0.98792	2559	-0.01123	0.019706	0.568651	0.983658
Colorectal cancer	Cholesterol to total lipids ratio in medium HDL	4758	-0.01432	0.014136	0.3112	0.518667	2927	0.005242	0.017982	0.770701	0.844101	2611	-0.01193	0.017685	0.499884	0.615801	2559	-0.00153	0.019315	0.936908	0.989619
Proximal colon cancer	Cholesterol to total lipids ratio in medium LDL	4758	0.014127	0.014753	0.338317	0.901214	2927	0.024972	0.018332	0.173249	0.716767	2611	0.036123	0.019535	0.064551	0.181057	2559	0.008506	0.019453	0.661951	0.970622
Colon cancer	Cholesterol to total lipids ratio in medium LDL	4758	0.013051	0.014298	0.361405	0.892672	2927	0.03091	0.019002	0.103915	0.655485	2611	0.027776	0.020015	0.165324	0.339505	2559	-0.00644	0.01952	0.741656	0.972717
Distal colon cancer	Cholesterol to total lipids ratio in medium LDL	4758	0.002765	0.014243	0.846093	0.998606	2927	0.011901	0.018396	0.517704	0.989826	2611	-0.00961	0.019163	0.61621	0.977436	2559	-0.01474	0.019017	0.438237	0.983584
Rectal cancer	Cholesterol to total lipids ratio in medium LDL	4758	0.001711	0.014565	0.906504	0.999758	2927	0.026084	0.018283	0.153772	0.995226	2611	-0.00105	0.020018	0.958088	0.98792	2559	-0.01471	0.019614	0.45326	0.983658
Colorectal cancer	Cholesterol to total lipids ratio in medium LDL	4758	0.014789	0.014352	0.302863	0.515989	2927	0.059015	0.01858	0.001508	0.034682	2611	0.061025	0.019783	0.002059	0.021396	2559	0.018756	0.019492	0.336017	0.989619
Colon cancer	Cholesterol to total lipids ratio in medium VLDL	4758	0.022794	0.014166	0.107672	0.892672	2927	0.00839	0.017607	0.633757	0.779487	2611	0.013694	0.018232	0.452678	0.575226	2559	0.032215	0.01947	0.098135	0.663156
Proximal colon cancer	Cholesterol to total lipids ratio in medium VLDL	4758	0.004475	0.014556	0.758528	0.901214	2927	0.0265	0.017081	0.120904	0.716767	2611	0.01623	0.018264	0.374295	0.505434	2559	0.017349	0.018488	0.348134	0.970622
Distal colon cancer	Cholesterol to total lipids ratio in medium VLDL	4758	0.01887	0.014597	0.196183	0.998606	2927	-0.00227	0.017302	0.895511	0.989826	2611	-0.01236	0.01773	0.485732	0.887047	2559	-0.00154	0.01931	0.936258	0.983584
Rectal cancer	Cholesterol to total lipids ratio in medium VLDL	4758	0.020762	0.014427	0.150177	0.999758	2927	0.022607	0.017968	0.208442	0.995226	2611	0.005815	0.018916	0.758556	0.98792	2559	0.002666	0.019579	0.891713	0.983658
Colorectal cancer	Cholesterol to total lipids ratio in medium VLDL	4758	0.019079	0.01407	0.175151	0.445308	2927	0.029695	0.017526	0.090315	0.246366	2611	0.027242	0.018286	0.136418	0.277666	2559	0.003837	0.019198	0.84161	0.989619
Proximal colon cancer	Cholesterol to total lipids ratio in small HDL	4758	0.010446	0.014362	0.467036	0.901214	2927	0.02425	0.016684	0.146203	0.716767	2611	0.021496	0.015863	0.175505	0.301947	2559	-0.0054	0.019637	0.783352	0.970622
Colon cancer	Cholesterol to total lipids ratio in small HDL	4758	0.02272	0.014169	0.108892	0.892672	2927	0.015975	0.017722	0.367422	0.655485	2611	0.025122	0.016603	0.13038	0.294775	2559	-0.01073	0.020233	0.595786	0.972717
Distal colon cancer	Cholesterol to total lipids ratio in small HDL	4758	0.01445	0.014417	0.316252	0.998606	2927	0.017435	0.01684	0.300576	0.989826	2611	-0.00138	0.016165	0.931828	0.987198	2559	-0.00817	0.019525	0.675686	0.983584
Rectal cancer	Cholesterol to total lipids ratio in small HDL	4758	0.015386	0.014497	0.288601	0.999758	2927	0.019515	0.017493	0.264667	0.995226	2611	0.005725	0.016949	0.735564	0.98792	2559	-0.01515	0.020188	0.452921	0.983658
Colorectal cancer	Cholesterol to total lipids ratio in small HDL	4758	0.012539	0.014147	0.375469	0.583499	2927	-0.0144	0.017055	0.398581	0.54869	2611	0.019458	0.016591	0.240997	0.380822	2559	0.017437	0.019611	0.374007	0.989619
Distal colon cancer	Cholesterol to total lipids ratio in small LDL	4758	0.001876	0.014241	0.895229	0.998606	2927	0.012001	0.018241	0.510641	0.989826	2611	-0.01004	0.018906	0.59546	0.953302	2559	-0.01784	0.019295	0.355145	0.954184
Proximal colon cancer	Cholesterol to total lipids ratio in small LDL	4758	0.014338	0.014669	0.328382	0.901214	2927	0.024541	0.018232	0.178402	0.716767	2611	0.038621	0.019206	0.044446	0.157271	2559	0.009871	0.019686	0.616103	0.970622
Colon cancer	Cholesterol to total lipids ratio in small LDL	4758	0.013485	0.014264	0.3445	0.892672	2927	0.028976	0.018695	0.121261	0.655485	2611	0.02842	0.019683	0.148883	0.326124	2559	-0.00529	0.019718	0.788632	0.972717
Rectal cancer	Cholesterol to total lipids ratio in small LDL	4758	0.005275	0.014572	0.717354	0.999758	2927	0.026011	0.018231	0.153768	0.995226	2611	0.000628	0.019764	0.974647	0.98792	2559	-0.01375	0.019827	0.488137	0.983658
Colorectal cancer	Cholesterol to total lipids ratio in small LDL	4758	0.011693	0.014234	0.411402	0.610468	2927	0.049374	0.018483	0.007598	0.072818	2611	0.059357	0.01956	0.002432	0.021396	2559	0.022252	0.019636	0.257232	0.989619
Proximal colon cancer	Cholesterol to total lipids ratio in small VLDL	4758	0.018035	0.01464	0.218031	0.901214	2927	0.042854	0.018423	0.020079	0.716767	2611	0.011899	0.019202	0.535534	0.65586	2559	0.015168	0.019269	0.431261	0.970622
Colon cancer	Cholesterol to total lipids ratio in small VLDL	4758	0.015941	0.01431	0.265343	0.892672	2927	0.038131	0.019274	0.047976	0.655485	2611	0.010021	0.019621	0.609594	0.704556	2559	0.010921	0.020258	0.58987	0.972717
Distal colon cancer	Cholesterol to total lipids ratio in small VLDL	4758	0.002127	0.014401	0.882564	0.998606	2927	0.019223	0.018546	0.300057	0.989826	2611	-0.02511	0.019116	0.189109	0.821788	2559	-0.01213	0.020024	0.544619	0.983584
Rectal cancer	Cholesterol to total lipids ratio in small VLDL	4758	0.007774	0.014698	0.596875	0.999758	2927	0.016616	0.018547	0.370385	0.995226	2611	-0.0135	0.019843	0.496514	0.98792	2559	-0.005	0.020238	0.804717	0.983658
Colorectal cancer	Cholesterol to total lipids ratio in small VLDL	4758	-0.00206	0.014645	0.888238	0.950208	2927	0.04551	0.018761	0.015333	0.093313	2611	0.036091	0.019137	0.059422	0.175445	2559	0.006073	0.019369	0.753894	0.989619
Distal colon cancer	Cholesterol to total lipids ratio in very large HDL	4758	0.001025	0.014393	0.943224	0.998606	2927	-0.0029	0.017325	0.867092	0.989826	2611	0.003752	0.016914	0.82448	0.987198	2559	-0.02328	0.019209	0.225603	0.860191
Colon cancer	Cholesterol to total lipids ratio in very large HDL	4758	-0.01416	0.014456	0.327512	0.892672	2927	-0.02283	0.016864	0.175965	0.655485	2611	-0.00887	0.017296	0.608204	0.704556	2559	-0.00801	0.019546	0.682115	0.972717
Proximal colon cancer	Cholesterol to total lipids ratio in very large HDL	4758	0.039089	0.01433	0.0064	0.72363	2927	0.009722	0.01713	0.570378	0.870598	2611	0.01859	0.016549	0.261411	0.400479	2559	-0.00372	0.019436	0.848113	0.979943
Rectal cancer	Cholesterol to total lipids ratio in very large HDL	4758	-0.00877	0.0146	0.547974	0.999758	2927	-0.00559	0.017663	0.751635	0.995226	2611	-0.01685	0.017226	0.327949	0.98792	2559	-0.00221	0.019427	0.909573	0.983658
Colorectal cancer	Cholesterol to total lipids ratio in very large HDL	4758	-0.00281	0.014305	0.84421	0.915888	2927	0.024782	0.017008	0.145188	0.310342	2611	0.018722	0.016771	0.264378	0.387305	2559	0.023256	0.01995	0.243848	0.989619
Proximal colon cancer	Cholesterol to total lipids ratio in very large VLDL	4758	0.007694	0.014433	0.594005	0.901214	2927	0.040254	0.018069	0.025971	0.716767	2611	0.000367	0.019082	0.984646	0.984646	2559	-0.01444	0.019533	0.459666	0.970622
Distal colon cancer	Cholesterol to total lipids ratio in very large VLDL	4758	0.00538	0.014613	0.712775	0.998606	2927	0.026087	0.018005	0.147475	0.989826	2611	-0.01076	0.019308	0.577282	0.953302	2559	-0.01042	0.01931	0.589646	0.983584
Rectal cancer	Cholesterol to total lipids ratio in very large VLDL	4758	0.005884	0.014347	0.681743	0.999758	2927	0.023406	0.018281	0.200519	0.995226	2611	-0.00784	0.019322	0.68488	0.98792	2559	0.012888	0.019627	0.51148	0.983658
Colon cancer	Cholesterol to total lipids ratio in very large VLDL	4758	0.009309	0.014368	0.517067	0.964593	2927	0.038402	0.018119	0.034137	0.655485	2611	0.017007	0.018702	0.363262	0.49438	2559	0.000517	0.01906	0.978358	0.988335
Colorectal cancer	Cholesterol to total lipids ratio in very large VLDL	4758	-0.00889	0.014637	0.543777	0.722941	2927	0.033414	0.018403	0.069525	0.213211	2611	0.015661	0.019304	0.417271	0.533179	2559	0.004416	0.019417	0.8201	0.989619
Distal colon cancer	Cholesterol to total lipids ratio in very small VLDL	4758	-0.00557	0.014462	0.700069	0.998606	2927	0.013873	0.017956	0.439805	0.989826	2611	-0.02991	0.017905	0.094907	0.821788	2559	-0.05184	0.019547	0.00805	0.312786
Proximal colon cancer	Cholesterol to total lipids ratio in very small VLDL	4758	0.012238	0.015036	0.415733	0.901214	2927	0.024245	0.017775	0.172679	0.716767	2611	-0.01861	0.018305	0.309525	0.447073	2559	-0.0073	0.019237	0.704321	0.970622
Colon cancer	Cholesterol to total lipids ratio in very small VLDL	4758	0.002754	0.014437	0.848719	0.997663	2927	0.025688	0.018741	0.170583	0.655485	2611	-0.02234	0.018063	0.216261	0.379695	2559	-0.01052	0.019547	0.590663	0.972717
Rectal cancer	Cholesterol to total lipids ratio in very small VLDL	4758	-0.01006	0.014463	0.486832	0.999758	2927	0.002734	0.017935	0.878845	0.995226	2611	-0.01737	0.018583	0.349906	0.98792	2559	-0.02379	0.019948	0.233125	0.983658
Colorectal cancer	Cholesterol to total lipids ratio in very small VLDL	4758	-0.01202	0.014327	0.401394	0.60561	2927	0.026206	0.017637	0.137428	0.310342	2611	0.003101	0.017355	0.858211	0.931078	2559	0.007952	0.019663	0.685929	0.989619
Proximal colon cancer	Cholesteryl esters in chylomicrons and extremely large VLDL	4758	0.009503	0.01444	0.510508	0.901214	2927	0.010506	0.018378	0.567589	0.870598	2611	0.027149	0.019023	0.153649	0.272072	2559	0.014243	0.019567	0.466734	0.970622
Colon cancer	Cholesteryl esters in chylomicrons and extremely large VLDL	4758	0.009204	0.014223	0.517587	0.964593	2927	-0.00784	0.018555	0.672815	0.818769	2611	0.029033	0.019088	0.128382	0.294775	2559	-0.00339	0.019457	0.861851	0.972717
Distal colon cancer	Cholesteryl esters in chylomicrons and extremely large VLDL	4758	0.017188	0.013933	0.217399	0.998606	2927	-0.00188	0.018821	0.9204	0.989826	2611	0.025952	0.018839	0.168444	0.821788	2559	0.00243	0.020008	0.903327	0.983584
Rectal cancer	Cholesteryl esters in chylomicrons and extremely large VLDL	4758	0.01145	0.014156	0.418657	0.999758	2927	0.011053	0.019293	0.566768	0.995226	2611	0.002706	0.019766	0.891122	0.98792	2559	0.005233	0.020227	0.795895	0.983658
Colorectal cancer	Cholesteryl esters in chylomicrons and extremely large VLDL	4758	0.029518	0.014013	0.03521	0.445308	2927	0.032302	0.018638	0.083173	0.242148	2611	0.016832	0.019074	0.377597	0.502007	2559	-0.01271	0.019226	0.508772	0.989619
Proximal colon cancer	Cholesteryl esters in IDL	4758	0.01685	0.014864	0.256995	0.901214	2927	0.027496	0.017694	0.120294	0.716767	2611	0.039959	0.019028	0.035825	0.13508	2559	0.016461	0.020034	0.411365	0.970622
Colon cancer	Cholesteryl esters in IDL	4758	0.017984	0.014258	0.207277	0.892672	2927	0.023042	0.018168	0.204788	0.655485	2611	0.040657	0.01937	0.035913	0.123282	2559	0.002232	0.020119	0.911657	0.972717
Distal colon cancer	Cholesteryl esters in IDL	4758	0.007337	0.014067	0.601976	0.998606	2927	0.008205	0.017912	0.646937	0.989826	2611	-0.00186	0.018823	0.921305	0.987198	2559	-0.00586	0.019963	0.769016	0.983584
Rectal cancer	Cholesteryl esters in IDL	4758	0.00688	0.014409	0.633054	0.999758	2927	0.022851	0.01817	0.208645	0.995226	2611	0.000526	0.019427	0.978395	0.98792	2559	0.003936	0.020428	0.847233	0.983658
Colorectal cancer	Cholesteryl esters in IDL	4758	0.026426	0.014368	0.065954	0.445308	2927	0.055634	0.018012	0.00203	0.038902	2611	0.061051	0.019133	0.001435	0.021396	2559	0.010752	0.019573	0.582821	0.989619
Distal colon cancer	Cholesteryl esters in large HDL	4758	0.00407	0.014146	0.773584	0.998606	2927	-0.00254	0.01775	0.886051	0.989826	2611	-0.01743	0.017389	0.316125	0.860196	2559	0.035248	0.017346	0.042248	0.49586
Colon cancer	Cholesteryl esters in large HDL	4758	0.016187	0.014329	0.258675	0.892672	2927	0.020852	0.018346	0.255798	0.655485	2611	0.010114	0.018428	0.583155	0.680841	2559	0.039703	0.017546	0.023733	0.524453
Rectal cancer	Cholesteryl esters in large HDL	4758	0.00076	0.014358	0.957769	0.999758	2927	-0.00235	0.018719	0.899899	0.995226	2611	0.003309	0.017905	0.853392	0.98792	2559	0.024291	0.017636	0.168516	0.983658
Colorectal cancer	Cholesteryl esters in large HDL	4758	0.004213	0.014163	0.766109	0.881025	2927	-0.01664	0.017685	0.346704	0.503723	2611	-0.02324	0.017013	0.17211	0.329877	2559	-0.00238	0.017211	0.890212	0.989619
Proximal colon cancer	Cholesteryl esters in large HDL	4758	-0.0211	0.014062	0.133449	0.901214	2927	0.005017	0.017751	0.777481	0.917029	2611	-0.02782	0.017045	0.102761	0.253515	2559	-0.00057	0.016802	0.972754	0.993758
Proximal colon cancer	Cholesteryl esters in large LDL	4758	0.011176	0.014762	0.449024	0.901214	2927	0.022339	0.017395	0.199165	0.716767	2611	0.044722	0.018322	0.014718	0.1221	2559	0.015299	0.020147	0.447699	0.970622
Colon cancer	Cholesteryl esters in large LDL	4758	0.013872	0.014199	0.328611	0.892672	2927	0.019199	0.017766	0.279937	0.655485	2611	0.046513	0.01868	0.012835	0.074602	2559	0.003816	0.020077	0.849262	0.972717
Distal colon cancer	Cholesteryl esters in large LDL	4758	0.000566	0.014279	0.968381	0.998606	2927	0.006286	0.017423	0.718275	0.989826	2611	0.003088	0.018113	0.864663	0.987198	2559	-0.00131	0.019876	0.947567	0.983584
Rectal cancer	Cholesteryl esters in large LDL	4758	0.002338	0.014457	0.871532	0.999758	2927	0.020095	0.017818	0.259497	0.995226	2611	0.003591	0.018776	0.848323	0.98792	2559	0.005749	0.020365	0.777739	0.983658
Colorectal cancer	Cholesteryl esters in large LDL	4758	0.021083	0.014014	0.132526	0.445308	2927	0.043844	0.017738	0.013502	0.093313	2611	0.056457	0.018574	0.002392	0.021396	2559	0.014147	0.019599	0.470464	0.989619
Colon cancer	Cholesteryl esters in large VLDL	4758	0.00328	0.014245	0.817893	0.997663	2927	-0.01977	0.018647	0.289121	0.655485	2611	0.020014	0.019066	0.293934	0.453723	2559	-0.02044	0.019429	0.292968	0.89786
Proximal colon cancer	Cholesteryl esters in large VLDL	4758	0.007227	0.014336	0.61421	0.901214	2927	-0.0053	0.018386	0.772989	0.917029	2611	0.028281	0.018999	0.136716	0.267216	2559	0.008769	0.019091	0.646052	0.970622
Distal colon cancer	Cholesteryl esters in large VLDL	4758	0.014104	0.014023	0.314575	0.998606	2927	-0.01165	0.018436	0.527483	0.989826	2611	0.024686	0.018668	0.18618	0.821788	2559	-0.01068	0.020071	0.594527	0.983584
Rectal cancer	Cholesteryl esters in large VLDL	4758	0.006531	0.014086	0.642898	0.999758	2927	0.008963	0.019072	0.638436	0.995226	2611	0.005892	0.019752	0.7655	0.98792	2559	-0.006	0.019936	0.763376	0.983658
Colorectal cancer	Cholesteryl esters in large VLDL	4758	0.027049	0.014041	0.054103	0.445308	2927	0.026206	0.018397	0.154418	0.310342	2611	0.0226	0.018642	0.225503	0.375839	2559	-0.0099	0.019335	0.60858	0.989619
Distal colon cancer	Cholesteryl esters in medium HDL	4758	0.023907	0.014179	0.091837	0.998606	2927	-0.0019	0.017685	0.914547	0.989826	2611	-0.00477	0.017666	0.787362	0.987198	2559	0.047179	0.018592	0.011221	0.312786
Colon cancer	Cholesteryl esters in medium HDL	4758	0.030929	0.014671	0.035064	0.733164	2927	0.003963	0.018294	0.82851	0.911757	2611	-0.00211	0.018387	0.90863	0.942993	2559	0.013332	0.018623	0.47414	0.96121
Proximal colon cancer	Cholesteryl esters in medium HDL	4758	0.009444	0.014666	0.519649	0.901214	2927	0.010121	0.018031	0.574637	0.870598	2611	-0.01007	0.01785	0.572573	0.689486	2559	0.007806	0.018327	0.67021	0.970622
Rectal cancer	Cholesteryl esters in medium HDL	4758	0.011689	0.014544	0.421604	0.999758	2927	-0.01608	0.018493	0.384569	0.995226	2611	0.000566	0.017461	0.974137	0.98792	2559	0.019826	0.018881	0.293774	0.983658
Colorectal cancer	Cholesteryl esters in medium HDL	4758	0.012619	0.014373	0.380018	0.586605	2927	-0.01392	0.018043	0.440388	0.575507	2611	-0.01165	0.016981	0.49283	0.615801	2559	-0.01207	0.01823	0.507973	0.989619
Proximal colon cancer	Cholesteryl esters in medium LDL	4758	0.009667	0.014805	0.513826	0.901214	2927	0.021097	0.017432	0.226287	0.716767	2611	0.046769	0.018312	0.010703	0.118838	2559	0.012481	0.020115	0.53499	0.970622
Colon cancer	Cholesteryl esters in medium LDL	4758	0.012071	0.014275	0.397832	0.892672	2927	0.016694	0.017781	0.347873	0.655485	2611	0.046532	0.018681	0.012805	0.074602	2559	0.0031	0.020076	0.877302	0.972717
Distal colon cancer	Cholesteryl esters in medium LDL	4758	-0.00223	0.014406	0.876785	0.998606	2927	0.006848	0.017447	0.694707	0.989826	2611	0.003762	0.018082	0.835181	0.987198	2559	-0.00137	0.019717	0.944775	0.983584
Rectal cancer	Cholesteryl esters in medium LDL	4758	-5.9e-05	0.014487	0.99675	0.999758	2927	0.019663	0.01768	0.266153	0.995226	2611	0.004332	0.0187	0.816805	0.98792	2559	0.003656	0.020201	0.856401	0.983658
Colorectal cancer	Cholesteryl esters in medium LDL	4758	0.018644	0.013958	0.181701	0.445308	2927	0.04261	0.017739	0.016368	0.093313	2611	0.05713	0.018549	0.002092	0.021396	2559	0.016174	0.019638	0.410252	0.989619
Colon cancer	Cholesteryl esters in medium VLDL	4758	0.009463	0.014206	0.505337	0.960558	2927	-0.00581	0.018613	0.754776	0.876759	2611	0.02516	0.019017	0.185945	0.356659	2559	-0.01239	0.019743	0.530487	0.967992
Proximal colon cancer	Cholesteryl esters in medium VLDL	4758	0.008644	0.014404	0.548472	0.901214	2927	0.010946	0.018058	0.544448	0.870598	2611	0.028276	0.019028	0.137402	0.267216	2559	0.018668	0.019744	0.344469	0.970622
Distal colon cancer	Cholesteryl esters in medium VLDL	4758	0.020367	0.014038	0.14688	0.998606	2927	-0.00429	0.018506	0.816495	0.989826	2611	0.013211	0.018729	0.480614	0.887047	2559	-0.00844	0.020102	0.674539	0.983584
Rectal cancer	Cholesteryl esters in medium VLDL	4758	0.009776	0.014137	0.489278	0.999758	2927	0.017418	0.018865	0.355921	0.995226	2611	0.007705	0.019711	0.695923	0.98792	2559	-0.00979	0.0204	0.631233	0.983658
Colorectal cancer	Cholesteryl esters in medium VLDL	4758	0.031446	0.014064	0.025405	0.445308	2927	0.039134	0.01823	0.031904	0.126514	2611	0.033753	0.018661	0.070607	0.194519	2559	-0.01254	0.019521	0.52055	0.989619
Colon cancer	Cholesteryl esters in small HDL	4758	0.027319	0.014437	0.058514	0.892672	2927	0.004707	0.01756	0.788665	0.895084	2611	0.02732	0.016214	0.092116	0.238208	2559	-0.02022	0.01983	0.308064	0.89786
Proximal colon cancer	Cholesteryl esters in small HDL	4758	0.020085	0.014652	0.170492	0.901214	2927	0.023719	0.016528	0.151375	0.716767	2611	0.034842	0.015555	0.02518	0.1221	2559	0.008444	0.019417	0.663687	0.970622
Distal colon cancer	Cholesteryl esters in small HDL	4758	0.017471	0.014373	0.224217	0.998606	2927	0.01458	0.016628	0.380647	0.989826	2611	0.006304	0.01568	0.687708	0.987198	2559	0.011851	0.019414	0.541611	0.983584
Rectal cancer	Cholesteryl esters in small HDL	4758	0.02019	0.014475	0.163122	0.999758	2927	0.012936	0.017375	0.456631	0.995226	2611	0.004578	0.01651	0.781593	0.98792	2559	-0.00772	0.020119	0.701103	0.983658
Colorectal cancer	Cholesteryl esters in small HDL	4758	0.015056	0.014165	0.287876	0.504168	2927	-0.02454	0.017049	0.150108	0.310342	2611	0.023057	0.015456	0.135873	0.277666	2559	-0.00053	0.019323	0.978158	0.989619
Proximal colon cancer	Cholesteryl esters in small LDL	4758	0.010274	0.014814	0.488043	0.901214	2927	0.020162	0.017472	0.248612	0.716767	2611	0.04761	0.018318	0.0094	0.118838	2559	0.011242	0.020092	0.575832	0.970622
Colon cancer	Cholesteryl esters in small LDL	4758	0.012227	0.014315	0.393043	0.892672	2927	0.017117	0.017837	0.337321	0.655485	2611	0.046493	0.018641	0.012691	0.074602	2559	0.003661	0.020083	0.855356	0.972717
Distal colon cancer	Cholesteryl esters in small LDL	4758	-0.00278	0.014451	0.847271	0.998606	2927	0.007578	0.017433	0.663814	0.989826	2611	0.004162	0.018038	0.81754	0.987198	2559	-0.00073	0.019715	0.970352	0.983584
Rectal cancer	Cholesteryl esters in small LDL	4758	-0.0014	0.014478	0.923164	0.999758	2927	0.018918	0.017613	0.282871	0.995226	2611	0.004611	0.01865	0.804737	0.98792	2559	0.004267	0.020157	0.832363	0.983658
Colorectal cancer	Cholesteryl esters in small LDL	4758	0.017355	0.013975	0.214348	0.449888	2927	0.041566	0.017803	0.019624	0.100302	2611	0.056738	0.018579	0.002282	0.021396	2559	0.01718	0.019695	0.383126	0.989619
Colon cancer	Cholesteryl esters in small VLDL	4758	0.00871	0.014409	0.545567	0.97813	2927	0.005548	0.018313	0.761929	0.87873	2611	0.033943	0.019413	0.080496	0.215281	2559	-0.01236	0.019779	0.532229	0.967992
Proximal colon cancer	Cholesteryl esters in small VLDL	4758	0.023092	0.014596	0.113699	0.901214	2927	0.022886	0.018447	0.214845	0.716767	2611	0.043847	0.019447	0.024238	0.1221	2559	0.020695	0.019895	0.298337	0.970622
Distal colon cancer	Cholesteryl esters in small VLDL	4758	0.005935	0.013919	0.669839	0.998606	2927	0.006519	0.018451	0.723865	0.989826	2611	0.008476	0.018662	0.649744	0.987198	2559	-0.01282	0.019799	0.517478	0.983584
Rectal cancer	Cholesteryl esters in small VLDL	4758	0.00227	0.014287	0.873748	0.999758	2927	0.01762	0.018979	0.353283	0.995226	2611	-0.00017	0.019415	0.9932	0.9932	2559	-0.00665	0.020317	0.743459	0.983658
Colorectal cancer	Cholesteryl esters in small VLDL	4758	0.017821	0.014178	0.208828	0.449888	2927	0.057421	0.018272	0.001691	0.035364	2611	0.056366	0.019024	0.003076	0.021396	2559	-0.00236	0.019383	0.903289	0.989619
Colon cancer	Cholesteryl esters in very large HDL	4758	0.004274	0.013993	0.760039	0.997663	2927	0.015271	0.01857	0.410948	0.66562	2611	0.033579	0.019174	0.080008	0.215281	2559	0.031586	0.018533	0.088452	0.657495
Distal colon cancer	Cholesteryl esters in very large HDL	4758	-0.00921	0.014346	0.52094	0.998606	2927	-0.00971	0.017181	0.572086	0.989826	2611	-0.01407	0.018285	0.441571	0.883142	2559	0.019158	0.017861	0.283545	0.928506
Proximal colon cancer	Cholesteryl esters in very large HDL	4758	-0.00735	0.014213	0.605186	0.901214	2927	0.012691	0.017998	0.480768	0.850398	2611	-0.00618	0.018801	0.742235	0.805255	2559	-0.00567	0.017546	0.746515	0.970622
Rectal cancer	Cholesteryl esters in very large HDL	4758	-0.01313	0.014507	0.365409	0.999758	2927	-0.00377	0.018566	0.839183	0.995226	2611	-0.00608	0.018606	0.743932	0.98792	2559	0.024257	0.017903	0.175558	0.983658
Colorectal cancer	Cholesteryl esters in very large HDL	4758	0.001121	0.013797	0.935242	0.973329	2927	0.014399	0.017731	0.416815	0.557887	2611	0.000465	0.018549	0.979985	0.984264	2559	0.011153	0.018095	0.53771	0.989619
Colon cancer	Cholesteryl esters in very large VLDL	4758	0.001519	0.014244	0.91508	0.997663	2927	-0.01758	0.01862	0.345219	0.655485	2611	0.020636	0.019001	0.277563	0.44333	2559	-0.01646	0.019102	0.388824	0.89786
Proximal colon cancer	Cholesteryl esters in very large VLDL	4758	0.007054	0.014305	0.621964	0.901214	2927	-0.00657	0.01833	0.720005	0.917029	2611	0.027625	0.018869	0.143303	0.270099	2559	-0.00497	0.019211	0.795921	0.970622
Distal colon cancer	Cholesteryl esters in very large VLDL	4758	0.009686	0.014067	0.491132	0.998606	2927	-0.00884	0.018487	0.632571	0.989826	2611	0.027224	0.01883	0.14835	0.821788	2559	-0.01399	0.019616	0.475855	0.983584
Rectal cancer	Cholesteryl esters in very large VLDL	4758	0.004982	0.014106	0.723981	0.999758	2927	0.005211	0.0192	0.78609	0.995226	2611	0.002788	0.019692	0.887415	0.98792	2559	-0.00371	0.020279	0.854664	0.983658
Colorectal cancer	Cholesteryl esters in very large VLDL	4758	0.023589	0.014043	0.093083	0.445308	2927	0.030431	0.018516	0.100388	0.262378	2611	0.023773	0.018875	0.207976	0.370246	2559	-0.01798	0.018915	0.342056	0.989619
Distal colon cancer	Cholesteryl esters in very small VLDL	4758	0.001581	0.014076	0.910604	0.998606	2927	0.013929	0.018584	0.453608	0.989826	2611	-0.00529	0.018919	0.77976	0.987198	2559	-0.0276	0.019786	0.163132	0.777602
Proximal colon cancer	Cholesteryl esters in very small VLDL	4758	0.019309	0.014806	0.192253	0.901214	2927	0.031058	0.018515	0.093563	0.716767	2611	0.033923	0.019642	0.084272	0.225378	2559	0.014691	0.019978	0.462193	0.970622
Colon cancer	Cholesteryl esters in very small VLDL	4758	0.010644	0.014443	0.461184	0.919715	2927	0.024168	0.018953	0.202355	0.655485	2611	0.024143	0.019516	0.216157	0.379695	2559	-0.00927	0.019956	0.642474	0.972717
Rectal cancer	Cholesteryl esters in very small VLDL	4758	-0.00206	0.014538	0.887305	0.999758	2927	0.02475	0.018698	0.185709	0.995226	2611	-0.00097	0.019723	0.960624	0.98792	2559	-0.0028	0.02049	0.891499	0.983658
Colorectal cancer	Cholesteryl esters in very small VLDL	4758	0.013262	0.014651	0.365435	0.571768	2927	0.066184	0.018424	0.000333	0.032982	2611	0.058043	0.019064	0.002353	0.021396	2559	0.006567	0.019574	0.737263	0.989619
Proximal colon cancer	Cholesteryl esters to total lipids ratio in chylomicrons and extremely large VLDL	4758	0.009212	0.014395	0.522234	0.901214	2927	0.024398	0.017912	0.173266	0.716767	2611	0.013035	0.018475	0.480555	0.61065	2559	0.00668	0.019777	0.735572	0.970622
Colon cancer	Cholesteryl esters to total lipids ratio in chylomicrons and extremely large VLDL	4758	0.031962	0.014119	0.023629	0.733164	2927	0.003608	0.017762	0.839045	0.914599	2611	0.020372	0.018453	0.269702	0.43973	2559	0.00247	0.019431	0.898879	0.972717
Distal colon cancer	Cholesteryl esters to total lipids ratio in chylomicrons and extremely large VLDL	4758	0.030048	0.014484	0.038077	0.998606	2927	0.006437	0.018115	0.722384	0.989826	2611	0.01102	0.018837	0.558567	0.934318	2559	-0.00127	0.019703	0.948646	0.983584
Rectal cancer	Cholesteryl esters to total lipids ratio in chylomicrons and extremely large VLDL	4758	0.033282	0.014428	0.021114	0.999758	2927	0.019238	0.018362	0.294861	0.995226	2611	0.009367	0.019336	0.62814	0.98792	2559	0.009885	0.019292	0.608413	0.983658
Colorectal cancer	Cholesteryl esters to total lipids ratio in chylomicrons and extremely large VLDL	4758	0.031743	0.013987	0.023288	0.445308	2927	0.020241	0.018257	0.267662	0.433537	2611	-0.00103	0.019428	0.957767	0.979342	2559	-0.00954	0.019411	0.623284	0.989619
Distal colon cancer	Cholesteryl esters to total lipids ratio in IDL	4758	0.019229	0.014619	0.188461	0.998606	2927	0.011603	0.018432	0.529081	0.989826	2611	-0.01265	0.017767	0.476693	0.887047	2559	-0.02244	0.019176	0.241973	0.868999
Colon cancer	Cholesteryl esters to total lipids ratio in IDL	4758	0.011361	0.014467	0.432308	0.901474	2927	0.012336	0.018909	0.514206	0.730046	2611	-0.00871	0.018011	0.628721	0.712344	2559	-0.019	0.019602	0.332561	0.89786
Proximal colon cancer	Cholesteryl esters to total lipids ratio in IDL	4758	0.031538	0.014876	0.034055	0.901214	2927	0.02196	0.017864	0.219058	0.716767	2611	0.00739	0.017548	0.67372	0.763124	2559	0.004077	0.019282	0.832566	0.974427
Rectal cancer	Cholesteryl esters to total lipids ratio in IDL	4758	0.011944	0.01445	0.408513	0.999758	2927	0.014024	0.018608	0.451129	0.995226	2611	-0.01447	0.018169	0.425807	0.98792	2559	-0.01558	0.019984	0.435817	0.983658
Colorectal cancer	Cholesteryl esters to total lipids ratio in IDL	4758	0.015993	0.014639	0.27467	0.489722	2927	0.060393	0.017834	0.000718	0.032982	2611	0.027065	0.017185	0.115404	0.255219	2559	0.004506	0.019698	0.819085	0.989619
Colon cancer	Cholesteryl esters to total lipids ratio in large HDL	4758	-0.00108	0.014281	0.939572	0.997663	2927	0.010839	0.018567	0.559437	0.75246	2611	-0.0189	0.019544	0.333724	0.476332	2559	0.032948	0.019186	0.086053	0.657495
Proximal colon cancer	Cholesteryl esters to total lipids ratio in large HDL	4758	-0.02134	0.014373	0.137687	0.901214	2927	-0.0119	0.018114	0.511304	0.867347	2611	-0.05209	0.018552	0.005029	0.118838	2559	-0.01417	0.019049	0.456873	0.970622
Distal colon cancer	Cholesteryl esters to total lipids ratio in large HDL	4758	0.000278	0.014244	0.984415	0.998606	2927	-0.00687	0.018498	0.71021	0.989826	2611	-0.01754	0.018824	0.351459	0.860196	2559	0.008413	0.018549	0.650168	0.983584
Rectal cancer	Cholesteryl esters to total lipids ratio in large HDL	4758	-0.00343	0.014227	0.809617	0.999758	2927	-0.00821	0.018671	0.660132	0.995226	2611	-0.00587	0.019506	0.763399	0.98792	2559	0.008906	0.019093	0.640919	0.983658
Colorectal cancer	Cholesteryl esters to total lipids ratio in large HDL	4758	-0.00726	0.014201	0.608974	0.786876	2927	-0.02585	0.018119	0.153843	0.310342	2611	-0.05497	0.019005	0.003855	0.021396	2559	0.001539	0.018996	0.935448	0.989619
Proximal colon cancer	Cholesteryl esters to total lipids ratio in large LDL	4758	0.020773	0.014859	0.162171	0.901214	2927	0.024903	0.017843	0.162914	0.716767	2611	0.043706	0.01931	0.023697	0.1221	2559	0.012977	0.019755	0.511318	0.970622
Colon cancer	Cholesteryl esters to total lipids ratio in large LDL	4758	0.019895	0.014304	0.164337	0.892672	2927	0.025065	0.018432	0.173983	0.655485	2611	0.03703	0.019548	0.058285	0.176389	2559	-0.00715	0.01971	0.716983	0.972717
Distal colon cancer	Cholesteryl esters to total lipids ratio in large LDL	4758	0.011573	0.01409	0.411499	0.998606	2927	0.012194	0.017941	0.496777	0.989826	2611	0.000954	0.01885	0.959633	0.987198	2559	-0.00939	0.019133	0.623729	0.983584
Rectal cancer	Cholesteryl esters to total lipids ratio in large LDL	4758	0.008216	0.014376	0.567689	0.999758	2927	0.022473	0.018344	0.220638	0.995226	2611	0.000704	0.0198	0.971641	0.98792	2559	-0.00768	0.019806	0.6984	0.983658
Colorectal cancer	Cholesteryl esters to total lipids ratio in large LDL	4758	0.028746	0.014434	0.04648	0.445308	2927	0.060058	0.018356	0.001081	0.032982	2611	0.060814	0.019484	0.00182	0.021396	2559	0.012196	0.019556	0.532935	0.989619
Colon cancer	Cholesteryl esters to total lipids ratio in large VLDL	4758	0.018406	0.014336	0.199239	0.892672	2927	-0.00137	0.018254	0.940026	0.965205	2611	-0.00274	0.01887	0.884704	0.924918	2559	0.016357	0.019617	0.404463	0.89786
Proximal colon cancer	Cholesteryl esters to total lipids ratio in large VLDL	4758	0.008737	0.014591	0.549345	0.901214	2927	0.022331	0.018069	0.216603	0.716767	2611	0.011212	0.018718	0.549216	0.668359	2559	0.018386	0.019259	0.339837	0.970622
Distal colon cancer	Cholesteryl esters to total lipids ratio in large VLDL	4758	0.023308	0.014561	0.10951	0.998606	2927	0.004736	0.017588	0.787747	0.989826	2611	-0.01102	0.018381	0.548758	0.928046	2559	-0.01225	0.019897	0.538115	0.983584
Rectal cancer	Cholesteryl esters to total lipids ratio in large VLDL	4758	0.031656	0.014437	0.028372	0.999758	2927	0.024516	0.018577	0.187045	0.995226	2611	0.002972	0.019437	0.878499	0.98792	2559	0.011664	0.019644	0.552734	0.983658
Colorectal cancer	Cholesteryl esters to total lipids ratio in large VLDL	4758	0.009419	0.01424	0.50835	0.683745	2927	0.017337	0.018017	0.335995	0.495377	2611	0.003608	0.01903	0.849625	0.926132	2559	0.025032	0.019743	0.204957	0.989619
Proximal colon cancer	Cholesteryl esters to total lipids ratio in medium HDL	4758	-0.00316	0.014719	0.829781	0.901214	2927	-0.02143	0.01818	0.23849	0.716767	2611	-0.04267	0.018206	0.019178	0.1221	2559	-0.01668	0.019141	0.383499	0.970622
Colon cancer	Cholesteryl esters to total lipids ratio in medium HDL	4758	-0.00727	0.014271	0.610389	0.985666	2927	-0.00052	0.01825	0.977297	0.984556	2611	-0.0461	0.017868	0.009928	0.074602	2559	-0.00279	0.019362	0.885558	0.972717
Distal colon cancer	Cholesteryl esters to total lipids ratio in medium HDL	4758	-0.0034	0.014049	0.809005	0.998606	2927	-0.00481	0.018484	0.794896	0.989826	2611	-0.00584	0.0176	0.739944	0.987198	2559	0.006274	0.019319	0.745375	0.983584
Rectal cancer	Cholesteryl esters to total lipids ratio in medium HDL	4758	-0.01385	0.014049	0.324147	0.999758	2927	-0.01343	0.018423	0.466174	0.995226	2611	-0.00462	0.018244	0.800193	0.98792	2559	-0.0183	0.019615	0.350829	0.983658
Colorectal cancer	Cholesteryl esters to total lipids ratio in medium HDL	4758	-0.01906	0.014104	0.176638	0.445308	2927	-0.00383	0.01789	0.83071	0.896209	2611	-0.02133	0.017471	0.222223	0.373076	2559	-0.00064	0.019154	0.973153	0.989619
Proximal colon cancer	Cholesteryl esters to total lipids ratio in medium LDL	4758	0.009461	0.014841	0.52383	0.901214	2927	0.020752	0.017756	0.242603	0.716767	2611	0.044059	0.018908	0.019871	0.1221	2559	0.015484	0.019882	0.436179	0.970622
Colon cancer	Cholesteryl esters to total lipids ratio in medium LDL	4758	0.012385	0.014342	0.387885	0.892672	2927	0.024312	0.01827	0.183399	0.655485	2611	0.040531	0.019273	0.035559	0.123282	2559	-0.00183	0.019825	0.926554	0.972717
Distal colon cancer	Cholesteryl esters to total lipids ratio in medium LDL	4758	-0.0031	0.014463	0.830397	0.998606	2927	0.009436	0.017782	0.59572	0.989826	2611	0.000313	0.0186	0.986579	0.993002	2559	-0.01118	0.019276	0.561998	0.983584
Rectal cancer	Cholesteryl esters to total lipids ratio in medium LDL	4758	-0.00063	0.014518	0.965595	0.999758	2927	0.022379	0.017832	0.209576	0.995226	2611	0.004644	0.019276	0.809633	0.98792	2559	-0.00888	0.019956	0.656514	0.983658
Colorectal cancer	Cholesteryl esters to total lipids ratio in medium LDL	4758	0.015362	0.014043	0.274034	0.489722	2927	0.049772	0.018056	0.005877	0.061441	2611	0.059602	0.019056	0.001781	0.021396	2559	0.017519	0.019591	0.371287	0.989619
Colon cancer	Cholesteryl esters to total lipids ratio in medium VLDL	4758	0.022131	0.01416	0.118145	0.892672	2927	0.015519	0.0181	0.391314	0.66508	2611	0.008401	0.018518	0.650089	0.732943	2559	0.035517	0.019214	0.064654	0.650998
Proximal colon cancer	Cholesteryl esters to total lipids ratio in medium VLDL	4758	0.005327	0.014599	0.71523	0.901214	2927	0.030039	0.017372	0.083883	0.716767	2611	0.0114	0.018423	0.536094	0.65586	2559	0.016893	0.018262	0.355033	0.970622
Distal colon cancer	Cholesteryl esters to total lipids ratio in medium VLDL	4758	0.018829	0.01476	0.202134	0.998606	2927	0.004052	0.017567	0.817594	0.989826	2611	-0.01537	0.018004	0.393487	0.87548	2559	-0.00613	0.019078	0.748159	0.983584
Colorectal cancer	Cholesteryl esters to total lipids ratio in medium VLDL	4758	0.013948	0.014218	0.326632	0.536609	2927	0.030384	0.017827	0.088419	0.246366	2611	0.023113	0.018571	0.213402	0.370246	2559	0.004841	0.019058	0.79952	0.989619
Rectal cancer	Cholesteryl esters to total lipids ratio in medium VLDL	4758	0.021411	0.014489	0.139531	0.999758	2927	0.02341	0.017926	0.191665	0.995226	2611	0.003173	0.019164	0.868518	0.98792	2559	3.24e-05	0.019011	0.998639	0.998639
Colon cancer	Cholesteryl esters to total lipids ratio in small HDL	4758	0.022369	0.0141	0.112697	0.892672	2927	0.015084	0.017641	0.392575	0.66508	2611	0.026991	0.016604	0.104163	0.254867	2559	-0.01251	0.020206	0.535782	0.967992
Proximal colon cancer	Cholesteryl esters to total lipids ratio in small HDL	4758	0.012518	0.014348	0.383013	0.901214	2927	0.024315	0.016636	0.143959	0.716767	2611	0.02836	0.016066	0.077633	0.210064	2559	-0.00411	0.019675	0.83468	0.974427
Distal colon cancer	Cholesteryl esters to total lipids ratio in small HDL	4758	0.014619	0.014394	0.309862	0.998606	2927	0.019379	0.016817	0.249258	0.989826	2611	0.002687	0.016257	0.868749	0.987198	2559	-0.01202	0.019407	0.535692	0.983584
Rectal cancer	Cholesteryl esters to total lipids ratio in small HDL	4758	0.016734	0.014509	0.248812	0.999758	2927	0.021067	0.017362	0.225071	0.995226	2611	0.007062	0.016923	0.676468	0.98792	2559	-0.01662	0.020212	0.411037	0.983658
Colorectal cancer	Cholesteryl esters to total lipids ratio in small HDL	4758	0.01206	0.014099	0.392398	0.601677	2927	-0.01435	0.016942	0.397218	0.54869	2611	0.025381	0.016652	0.127579	0.274235	2559	0.017047	0.019643	0.385544	0.989619
Proximal colon cancer	Cholesteryl esters to total lipids ratio in small LDL	4758	0.008458	0.014846	0.568894	0.901214	2927	0.018065	0.017615	0.305181	0.725233	2611	0.043792	0.018691	0.019206	0.1221	2559	0.016084	0.019979	0.420863	0.970622
Distal colon cancer	Cholesteryl esters to total lipids ratio in small LDL	4758	-0.00489	0.014534	0.736422	0.998606	2927	0.012143	0.017603	0.490381	0.989826	2611	0.001664	0.018375	0.927869	0.987198	2559	-0.01586	0.019484	0.415749	0.983584
Rectal cancer	Cholesteryl esters to total lipids ratio in small LDL	4758	0.000255	0.014505	0.985951	0.999758	2927	0.021831	0.017629	0.215692	0.995226	2611	0.006766	0.018976	0.721478	0.98792	2559	-0.01056	0.020041	0.598433	0.983658
Colon cancer	Cholesteryl esters to total lipids ratio in small LDL	4758	0.012962	0.014354	0.366559	0.892672	2927	0.024663	0.018052	0.171994	0.655485	2611	0.038855	0.019057	0.04156	0.138535	2559	-0.00045	0.019995	0.982195	0.988335
Colorectal cancer	Cholesteryl esters to total lipids ratio in small LDL	4758	0.011648	0.014047	0.407041	0.607918	2927	0.043556	0.017915	0.015107	0.093313	2611	0.056982	0.018901	0.002597	0.021396	2559	0.020503	0.019762	0.29959	0.989619
Distal colon cancer	Cholesteryl esters to total lipids ratio in small VLDL	4758	0.002334	0.014404	0.871265	0.998606	2927	0.020645	0.018742	0.270765	0.989826	2611	-0.02103	0.019174	0.272738	0.860196	2559	-0.02005	0.020007	0.316442	0.928506
Proximal colon cancer	Cholesteryl esters to total lipids ratio in small VLDL	4758	0.019892	0.01469	0.175763	0.901214	2927	0.041191	0.018531	0.026304	0.716767	2611	0.013007	0.01934	0.501307	0.630059	2559	0.01635	0.019352	0.398254	0.970622
Colon cancer	Cholesteryl esters to total lipids ratio in small VLDL	4758	0.015786	0.014316	0.270225	0.892672	2927	0.038863	0.01936	0.044794	0.655485	2611	0.008503	0.019642	0.665127	0.746241	2559	0.007154	0.02037	0.725467	0.972717
Rectal cancer	Cholesteryl esters to total lipids ratio in small VLDL	4758	0.008029	0.014761	0.586509	0.999758	2927	0.014324	0.018691	0.443543	0.995226	2611	-0.01243	0.01984	0.530883	0.98792	2559	-0.01263	0.020359	0.535147	0.983658
Colorectal cancer	Cholesteryl esters to total lipids ratio in small VLDL	4758	-0.00256	0.014657	0.861253	0.925646	2927	0.049924	0.018846	0.008115	0.074657	2611	0.037524	0.019083	0.049367	0.151393	2559	0.002162	0.019619	0.912275	0.989619
Distal colon cancer	Cholesteryl esters to total lipids ratio in very large HDL	4758	0.001834	0.014433	0.898894	0.998606	2927	-0.00087	0.01733	0.960094	0.989826	2611	0.002709	0.017067	0.873898	0.987198	2559	-0.02524	0.018427	0.170863	0.777602
Colon cancer	Cholesteryl esters to total lipids ratio in very large HDL	4758	-0.01238	0.014437	0.391272	0.892672	2927	-0.02204	0.016897	0.192233	0.655485	2611	-0.01042	0.017401	0.549183	0.653262	2559	-0.00568	0.018692	0.761165	0.972717
Rectal cancer	Cholesteryl esters to total lipids ratio in very large HDL	4758	-0.0073	0.014612	0.61745	0.999758	2927	-0.00557	0.017696	0.75301	0.995226	2611	-0.01747	0.017364	0.31439	0.98792	2559	-0.01737	0.0186	0.350585	0.983658
Colorectal cancer	Cholesteryl esters to total lipids ratio in very large HDL	4758	-0.00335	0.014348	0.815205	0.914492	2927	0.023987	0.01708	0.160324	0.317884	2611	0.019595	0.016918	0.246882	0.380822	2559	0.019478	0.019151	0.309206	0.989619
Proximal colon cancer	Cholesteryl esters to total lipids ratio in very large HDL	4758	0.039557	0.014289	0.005657	0.72363	2927	0.012199	0.017177	0.477662	0.850398	2611	0.018338	0.016632	0.27031	0.406348	2559	-0.00073	0.018621	0.968734	0.993758
Distal colon cancer	Cholesteryl esters to total lipids ratio in very large VLDL	4758	0.010855	0.014669	0.459345	0.998606	2927	0.026187	0.017857	0.142632	0.989826	2611	-0.0164	0.019255	0.394344	0.87548	2559	-0.02045	0.019479	0.293772	0.928506
Proximal colon cancer	Cholesteryl esters to total lipids ratio in very large VLDL	4758	0.005188	0.01453	0.721089	0.901214	2927	0.033446	0.018243	0.066861	0.716767	2611	-0.00826	0.019174	0.666601	0.759001	2559	-0.0166	0.019642	0.398028	0.970622
Colon cancer	Cholesteryl esters to total lipids ratio in very large VLDL	4758	0.006402	0.014381	0.656217	0.997663	2927	0.031493	0.018611	0.090711	0.655485	2611	-0.00011	0.019087	0.995214	0.995214	2559	-0.00413	0.019164	0.829239	0.972717
Rectal cancer	Cholesteryl esters to total lipids ratio in very large VLDL	4758	0.013225	0.014343	0.356563	0.999758	2927	0.02925	0.018181	0.107752	0.995226	2611	-0.01086	0.019611	0.579937	0.98792	2559	0.007082	0.01984	0.721139	0.983658
Colorectal cancer	Cholesteryl esters to total lipids ratio in very large VLDL	4758	-0.00734	0.01454	0.613939	0.78886	2927	0.032803	0.018319	0.073449	0.216582	2611	0.00237	0.019216	0.901854	0.942848	2559	0.008762	0.019377	0.651184	0.989619
Distal colon cancer	Cholesteryl esters to total lipids ratio in very small VLDL	4758	-0.00937	0.01444	0.51644	0.998606	2927	0.016801	0.017795	0.345164	0.989826	2611	-0.02031	0.017607	0.248875	0.853394	2559	-0.06325	0.019352	0.001096	0.244455
Colon cancer	Cholesteryl esters to total lipids ratio in very small VLDL	4758	-0.00027	0.014443	0.985209	0.997663	2927	0.024232	0.018261	0.184614	0.655485	2611	-0.02513	0.017646	0.154568	0.330634	2559	-0.01755	0.01924	0.361754	0.89786
Proximal colon cancer	Cholesteryl esters to total lipids ratio in very small VLDL	4758	0.01812	0.015028	0.227996	0.901214	2927	0.019207	0.017776	0.280028	0.716767	2611	-0.01462	0.017809	0.4119	0.541354	2559	-0.01357	0.019371	0.4836	0.970622
Rectal cancer	Cholesteryl esters to total lipids ratio in very small VLDL	4758	-0.00682	0.014462	0.637303	0.999758	2927	-0.0004	0.018185	0.982508	0.995226	2611	-0.01535	0.018196	0.399048	0.98792	2559	-0.02409	0.01949	0.216542	0.983658
Colorectal cancer	Cholesteryl esters to total lipids ratio in very small VLDL	4758	-0.01643	0.014442	0.255213	0.476377	2927	0.025334	0.017621	0.150624	0.310342	2611	0.000957	0.017057	0.955265	0.979342	2559	0.000685	0.019471	0.971944	0.989619
Distal colon cancer	Citrate	4751	-0.02012	0.014245	0.157836	0.998606	2912	-0.0157	0.017864	0.379625	0.989826	2610	-0.00656	0.019135	0.731576	0.987198	2559	-0.01262	0.019758	0.52309	0.983584
Rectal cancer	Citrate	4751	-0.00758	0.014488	0.60073	0.999758	2912	-0.01031	0.018257	0.572494	0.995226	2610	0.002024	0.019032	0.915314	0.98792	2559	0.025127	0.01958	0.199502	0.983658
Colon cancer	Citrate	4751	-0.00877	0.014268	0.538937	0.97813	2912	-0.03047	0.018368	0.097294	0.655485	2610	-0.00957	0.019745	0.628032	0.712344	2559	0.000417	0.020671	0.983903	0.988335
Colorectal cancer	Citrate	4751	-0.00366	0.014622	0.802592	0.904883	2912	-0.02797	0.018752	0.135921	0.310342	2610	-0.03341	0.019677	0.089644	0.231665	2559	0.007648	0.019358	0.692814	0.989619
Proximal colon cancer	Citrate	4751	-0.01783	0.014705	0.225421	0.901214	2912	-0.0193	0.017801	0.278464	0.716767	2610	-0.00619	0.018806	0.742083	0.805255	2559	-0.00153	0.019136	0.9364	0.993758
Proximal colon cancer	Concentration of chylomicrons and extremely large VLDL particles	4758	0.006716	0.014364	0.640089	0.901214	2927	-0.00843	0.018211	0.643595	0.880325	2611	0.028014	0.018977	0.140008	0.268348	2559	0.010207	0.01966	0.603672	0.970622
Colon cancer	Concentration of chylomicrons and extremely large VLDL particles	4758	0.000266	0.014231	0.985082	0.997663	2927	-0.01664	0.01858	0.370492	0.655485	2611	0.024563	0.019103	0.198614	0.374212	2559	-0.0098	0.019659	0.618202	0.972717
Distal colon cancer	Concentration of chylomicrons and extremely large VLDL particles	4758	0.003038	0.014291	0.831632	0.998606	2927	-0.00856	0.018471	0.643205	0.989826	2611	0.03081	0.018987	0.104765	0.821788	2559	0.002717	0.020117	0.892575	0.983584
Rectal cancer	Concentration of chylomicrons and extremely large VLDL particles	4758	0.000584	0.014182	0.967157	0.999758	2927	0.003837	0.019059	0.840476	0.995226	2611	0.004691	0.019859	0.813301	0.98792	2559	-0.00447	0.020227	0.824963	0.983658
Colorectal cancer	Concentration of chylomicrons and extremely large VLDL particles	4758	0.019237	0.014101	0.172571	0.445308	2927	0.02923	0.018434	0.11292	0.282299	2611	0.026383	0.019039	0.165962	0.323484	2559	-0.00538	0.019573	0.783489	0.989619
Proximal colon cancer	Concentration of IDL particles	4758	0.004889	0.014754	0.740367	0.901214	2927	0.018652	0.017464	0.28559	0.716767	2611	0.040847	0.018274	0.025482	0.1221	2559	0.017003	0.019899	0.392946	0.970622
Colon cancer	Concentration of IDL particles	4758	0.010374	0.014162	0.463856	0.919715	2927	0.017111	0.017755	0.335245	0.655485	2611	0.047539	0.018742	0.011256	0.074602	2559	0.004071	0.019945	0.838264	0.972717
Distal colon cancer	Concentration of IDL particles	4758	-0.00597	0.014322	0.676762	0.998606	2927	0.002369	0.01749	0.892267	0.989826	2611	0.000903	0.018245	0.960511	0.987198	2559	-0.00303	0.019896	0.878991	0.983584
Rectal cancer	Concentration of IDL particles	4758	-0.00197	0.014472	0.89188	0.999758	2927	0.018815	0.017789	0.290299	0.995226	2611	0.002241	0.018595	0.904097	0.98792	2559	0.007532	0.020449	0.712655	0.983658
Colorectal cancer	Concentration of IDL particles	4758	0.017719	0.013993	0.205472	0.449888	2927	0.042711	0.017558	0.015052	0.093313	2611	0.054046	0.018475	0.00347	0.021396	2559	0.010394	0.019405	0.592261	0.989619
Distal colon cancer	Concentration of large HDL particles	4758	0.003547	0.014206	0.802829	0.998606	2927	-0.00149	0.017476	0.932031	0.989826	2611	-0.0158	0.017017	0.353336	0.860196	2559	0.037974	0.017259	0.027875	0.423655
Colon cancer	Concentration of large HDL particles	4758	0.018543	0.014332	0.195796	0.892672	2927	0.021688	0.018267	0.235213	0.655485	2611	0.018382	0.018002	0.307293	0.464984	2559	0.039838	0.017384	0.022005	0.524453
Rectal cancer	Concentration of large HDL particles	4758	0.001405	0.014401	0.922273	0.999758	2927	-0.0006	0.018526	0.97433	0.995226	2611	0.005837	0.017603	0.740225	0.98792	2559	0.025793	0.017632	0.143624	0.983658
Colorectal cancer	Concentration of large HDL particles	4758	0.005825	0.014115	0.679835	0.817659	2927	-0.01131	0.017528	0.518701	0.63606	2611	-0.01399	0.01652	0.397149	0.521967	2559	-0.00199	0.016983	0.906562	0.989619
Proximal colon cancer	Concentration of large HDL particles	4758	-0.02094	0.014155	0.139147	0.901214	2927	0.009891	0.017588	0.573891	0.870598	2611	-0.01904	0.016712	0.254785	0.39595	2559	0.002614	0.016647	0.87525	0.993758
Proximal colon cancer	Concentration of large LDL particles	4758	0.008698	0.014766	0.555855	0.901214	2927	0.01933	0.017262	0.262896	0.716767	2611	0.046433	0.01789	0.0095	0.118838	2559	0.015594	0.020076	0.437376	0.970622
Colon cancer	Concentration of large LDL particles	4758	0.012649	0.014233	0.374203	0.892672	2927	0.015336	0.017587	0.383272	0.662802	2611	0.048386	0.018334	0.008362	0.074602	2559	0.005313	0.019986	0.790388	0.972717
Distal colon cancer	Concentration of large LDL particles	4758	-0.00277	0.014441	0.847929	0.998606	2927	0.004039	0.017261	0.814993	0.989826	2611	0.004289	0.017789	0.809516	0.987198	2559	0.00085	0.019894	0.965922	0.983584
Rectal cancer	Concentration of large LDL particles	4758	-7.2e-05	0.014493	0.996028	0.999758	2927	0.017583	0.01757	0.317043	0.995226	2611	0.003558	0.018329	0.846096	0.98792	2559	0.008729	0.020384	0.668542	0.983658
Colorectal cancer	Concentration of large LDL particles	4758	0.018411	0.013921	0.186056	0.445308	2927	0.037247	0.017491	0.0333	0.129812	2611	0.052817	0.018111	0.003572	0.021396	2559	0.014078	0.019462	0.469521	0.989619
Colon cancer	Concentration of large VLDL particles	4758	-0.00141	0.014265	0.92117	0.997663	2927	-0.02492	0.018948	0.188608	0.655485	2611	0.019122	0.019185	0.318999	0.473165	2559	-0.02508	0.019446	0.197273	0.807401
Proximal colon cancer	Concentration of large VLDL particles	4758	0.004308	0.01431	0.763395	0.901214	2927	-0.0147	0.018512	0.427084	0.847846	2611	0.028081	0.018884	0.137122	0.267216	2559	0.009555	0.019374	0.62194	0.970622
Distal colon cancer	Concentration of large VLDL particles	4758	0.007928	0.01414	0.575066	0.998606	2927	-0.01295	0.018436	0.482338	0.989826	2611	0.029773	0.018569	0.108971	0.821788	2559	0.002423	0.020183	0.90445	0.983584
Rectal cancer	Concentration of large VLDL particles	4758	-0.00059	0.014096	0.966515	0.999758	2927	0.002705	0.019015	0.886905	0.995226	2611	0.008863	0.01985	0.65526	0.98792	2559	-0.00871	0.019922	0.661983	0.983658
Colorectal cancer	Concentration of large VLDL particles	4758	0.022201	0.014156	0.116879	0.445308	2927	0.019724	0.018492	0.286215	0.444908	2611	0.022002	0.018633	0.237782	0.380822	2559	-0.01221	0.01928	0.526736	0.989619
Distal colon cancer	Concentration of medium HDL particles	4758	0.025375	0.014369	0.077476	0.998606	2927	0.000594	0.017283	0.972571	0.989826	2611	-0.00466	0.017048	0.784642	0.987198	2559	0.047343	0.018368	0.010008	0.312786
Colon cancer	Concentration of medium HDL particles	4758	0.032776	0.014728	0.026095	0.733164	2927	0.002143	0.018126	0.905916	0.946348	2611	0.014125	0.017639	0.423318	0.551427	2559	0.015341	0.018322	0.402501	0.89786
Proximal colon cancer	Concentration of medium HDL particles	4758	0.008683	0.01484	0.558527	0.901214	2927	0.019012	0.01771	0.283135	0.716767	2611	0.005545	0.017238	0.747737	0.807416	2559	0.01184	0.018111	0.513332	0.970622
Rectal cancer	Concentration of medium HDL particles	4758	0.018595	0.014475	0.198982	0.999758	2927	-0.0071	0.018106	0.694906	0.995226	2611	0.002302	0.016955	0.892021	0.98792	2559	0.024316	0.018675	0.193001	0.983658
Colorectal cancer	Concentration of medium HDL particles	4758	0.021852	0.014276	0.125917	0.445308	2927	-0.00992	0.01736	0.567592	0.656011	2611	4.7e-06	0.016159	0.999768	0.999768	2559	-0.01115	0.017878	0.533062	0.989619
Proximal colon cancer	Concentration of medium LDL particles	4758	0.010714	0.014816	0.469618	0.901214	2927	0.018112	0.017248	0.293758	0.717523	2611	0.049968	0.017921	0.005338	0.118838	2559	0.012424	0.020131	0.537204	0.970622
Colon cancer	Concentration of medium LDL particles	4758	0.011237	0.014276	0.431248	0.901474	2927	0.010513	0.017599	0.550326	0.752072	2611	0.049108	0.018302	0.007339	0.074602	2559	0.002757	0.019998	0.890342	0.972717
Distal colon cancer	Concentration of medium LDL particles	4758	-0.0023	0.014456	0.873794	0.998606	2927	0.004441	0.017287	0.797286	0.989826	2611	0.008198	0.017707	0.643398	0.987198	2559	0.002084	0.019774	0.916072	0.983584
Rectal cancer	Concentration of medium LDL particles	4758	-0.0004	0.014449	0.977734	0.999758	2927	0.01636	0.017586	0.352283	0.995226	2611	0.004399	0.018401	0.811076	0.98792	2559	0.007792	0.020192	0.699618	0.983658
Colorectal cancer	Concentration of medium LDL particles	4758	0.018435	0.013941	0.18611	0.445308	2927	0.03586	0.017546	0.041062	0.147567	2611	0.053325	0.0181	0.003247	0.021396	2559	0.015543	0.019607	0.428008	0.989619
Colon cancer	Concentration of medium VLDL particles	4758	-0.00122	0.014291	0.9322	0.997663	2927	-0.02439	0.018908	0.197199	0.655485	2611	0.018598	0.019151	0.331573	0.476332	2559	-0.02917	0.019266	0.130119	0.784228
Proximal colon cancer	Concentration of medium VLDL particles	4758	0.005555	0.014289	0.697471	0.901214	2927	-0.01356	0.018579	0.465698	0.850398	2611	0.030599	0.018891	0.105407	0.253515	2559	0.010818	0.019115	0.571482	0.970622
Distal colon cancer	Concentration of medium VLDL particles	4758	0.009421	0.014097	0.503985	0.998606	2927	-0.01253	0.018418	0.496493	0.989826	2611	0.027025	0.018587	0.146059	0.821788	2559	-0.0079	0.019785	0.689677	0.983584
Rectal cancer	Concentration of medium VLDL particles	4758	4.28e-06	0.014084	0.999758	0.999758	2927	0.004947	0.019076	0.795386	0.995226	2611	0.01016	0.019758	0.607145	0.98792	2559	-0.01619	0.019788	0.413397	0.983658
Colorectal cancer	Concentration of medium VLDL particles	4758	0.022852	0.014121	0.105659	0.445308	2927	0.024187	0.018545	0.192246	0.345603	2611	0.027002	0.018522	0.145	0.29	2559	-0.01429	0.019129	0.455173	0.989619
Distal colon cancer	Concentration of small HDL particles	4758	0.013206	0.014543	0.363865	0.998606	2927	-0.00371	0.018459	0.840772	0.989826	2611	0.009932	0.018202	0.585334	0.953302	2559	0.027898	0.019232	0.14702	0.777602
Colon cancer	Concentration of small HDL particles	4758	0.011684	0.014728	0.427608	0.901474	2927	-0.024	0.018572	0.196414	0.655485	2611	0.006969	0.018837	0.711449	0.786698	2559	-0.01736	0.01949	0.373086	0.89786
Proximal colon cancer	Concentration of small HDL particles	4758	0.027322	0.014834	0.065564	0.901214	2927	0.00338	0.018471	0.854835	0.962976	2611	0.026096	0.018291	0.15378	0.272072	2559	0.011147	0.019597	0.569522	0.970622
Rectal cancer	Concentration of small HDL particles	4758	0.009238	0.014458	0.522877	0.999758	2927	-0.0167	0.018491	0.36664	0.995226	2611	-0.00181	0.018647	0.922498	0.98792	2559	0.005966	0.01938	0.758224	0.983658
Colorectal cancer	Concentration of small HDL particles	4758	0.006328	0.014484	0.662226	0.815292	2927	-0.02165	0.017743	0.222576	0.382033	2611	0.004745	0.017463	0.78586	0.872716	2559	-0.01422	0.019091	0.456368	0.989619
Proximal colon cancer	Concentration of small LDL particles	4758	0.013467	0.014813	0.363345	0.901214	2927	0.018491	0.017391	0.28774	0.716767	2611	0.050446	0.018011	0.005134	0.118838	2559	0.011161	0.020016	0.577163	0.970622
Colon cancer	Concentration of small LDL particles	4758	0.010805	0.01432	0.450588	0.90908	2927	0.006113	0.017715	0.730043	0.861077	2611	0.049879	0.018295	0.006447	0.074602	2559	0.002897	0.019941	0.884496	0.972717
Distal colon cancer	Concentration of small LDL particles	4758	-0.00147	0.014469	0.919014	0.998606	2927	0.001038	0.017287	0.952123	0.989826	2611	0.007166	0.017733	0.686175	0.987198	2559	0.004783	0.019676	0.807967	0.983584
Rectal cancer	Concentration of small LDL particles	4758	-0.00198	0.014472	0.891061	0.999758	2927	0.014317	0.017773	0.420558	0.995226	2611	0.003455	0.01848	0.851702	0.98792	2559	0.008568	0.019999	0.668366	0.983658
Colorectal cancer	Concentration of small LDL particles	4758	0.01892	0.013983	0.176099	0.445308	2927	0.037491	0.017712	0.034372	0.131761	2611	0.052816	0.01829	0.003912	0.021396	2559	0.015141	0.01968	0.441769	0.989619
Colon cancer	Concentration of small VLDL particles	4758	-0.00312	0.014404	0.82828	0.997663	2927	-0.02476	0.01873	0.186277	0.655485	2611	0.026874	0.019296	0.163833	0.339473	2559	-0.02598	0.019438	0.181487	0.807401
Proximal colon cancer	Concentration of small VLDL particles	4758	0.008852	0.014454	0.540271	0.901214	2927	-0.00604	0.018663	0.746113	0.917029	2611	0.040697	0.019202	0.034148	0.13508	2559	0.015441	0.019429	0.426841	0.970622
Distal colon cancer	Concentration of small VLDL particles	4758	0.005741	0.014033	0.68248	0.998606	2927	-0.01102	0.018538	0.552184	0.989826	2611	0.022692	0.018606	0.222733	0.839813	2559	-0.00474	0.019859	0.811419	0.983584
Rectal cancer	Concentration of small VLDL particles	4758	-0.00149	0.014052	0.915592	0.999758	2927	0.008563	0.01908	0.653602	0.995226	2611	0.011066	0.019811	0.576519	0.98792	2559	-0.00769	0.019819	0.698138	0.983658
Colorectal cancer	Concentration of small VLDL particles	4758	0.019054	0.014049	0.175094	0.445308	2927	0.026543	0.018502	0.151507	0.310342	2611	0.033867	0.018602	0.06878	0.192918	2559	-0.00694	0.019086	0.716258	0.989619
Colon cancer	Concentration of very large HDL particles	4758	0.009898	0.014177	0.485111	0.929795	2927	0.024333	0.018045	0.177614	0.655485	2611	0.032084	0.018449	0.082145	0.217165	2559	0.036965	0.018109	0.041329	0.592474
Distal colon cancer	Concentration of very large HDL particles	4758	-0.00704	0.014369	0.624228	0.998606	2927	-0.0053	0.017119	0.757016	0.989826	2611	-0.01125	0.017542	0.52142	0.91124	2559	0.026186	0.017495	0.134587	0.777602
Rectal cancer	Concentration of very large HDL particles	4758	-0.0061	0.014417	0.672001	0.999758	2927	0.000989	0.018383	0.957116	0.995226	2611	0.005375	0.017972	0.7649	0.98792	2559	0.025901	0.017686	0.143185	0.983658
Colorectal cancer	Concentration of very large HDL particles	4758	0.003183	0.014012	0.820274	0.914492	2927	0.001236	0.017623	0.944102	0.956579	2611	-0.00969	0.017583	0.581737	0.693261	2559	0.005295	0.017862	0.766904	0.989619
Proximal colon cancer	Concentration of very large HDL particles	4758	-0.0242	0.014161	0.087506	0.901214	2927	0.005397	0.017578	0.758836	0.917029	2611	-0.01278	0.017223	0.458185	0.585459	2559	-0.00042	0.017129	0.980358	0.993758
Colon cancer	Concentration of very large VLDL particles	4758	-0.00148	0.014208	0.917003	0.997663	2927	-0.02122	0.018708	0.256794	0.655485	2611	0.019731	0.0191	0.301684	0.46225	2559	-0.02621	0.019669	0.18283	0.807401
Distal colon cancer	Concentration of very large VLDL particles	4758	0.003727	0.014228	0.793376	0.998606	2927	-0.01239	0.018247	0.497226	0.989826	2611	0.031416	0.018799	0.094805	0.821788	2559	-0.00427	0.020028	0.831118	0.983584
Rectal cancer	Concentration of very large VLDL particles	4758	-0.00027	0.014091	0.984621	0.999758	2927	0.001591	0.018908	0.932966	0.995226	2611	0.004993	0.01987	0.801608	0.98792	2559	-0.00774	0.020247	0.702182	0.983658
Colorectal cancer	Concentration of very large VLDL particles	4758	0.020048	0.01414	0.156307	0.445308	2927	0.023036	0.018514	0.213504	0.369218	2611	0.021353	0.018921	0.259195	0.385765	2559	-0.00888	0.019251	0.644528	0.989619
Proximal colon cancer	Concentration of very large VLDL particles	4758	0.00435	0.014312	0.76119	0.901214	2927	-0.01424	0.01824	0.435036	0.847846	2611	0.025655	0.018838	0.173362	0.301947	2559	-0.00115	0.019659	0.953409	0.993758
Proximal colon cancer	Concentration of very small VLDL particles	4758	0.006919	0.014768	0.639469	0.901214	2927	0.018891	0.017579	0.282616	0.716767	2611	0.041811	0.018642	0.024992	0.1221	2559	0.019525	0.020099	0.331413	0.970622
Colon cancer	Concentration of very small VLDL particles	4758	0.010223	0.014261	0.473514	0.922951	2927	0.006815	0.01782	0.702165	0.836777	2611	0.045649	0.018976	0.016211	0.079329	2559	-0.0078	0.019939	0.695523	0.972717
Distal colon cancer	Concentration of very small VLDL particles	4758	0.006367	0.013938	0.647831	0.998606	2927	-0.00042	0.017653	0.981219	0.989826	2611	0.004646	0.018254	0.799095	0.987198	2559	-0.01006	0.02	0.614923	0.983584
Rectal cancer	Concentration of very small VLDL particles	4758	0.000286	0.014317	0.984088	0.999758	2927	0.025472	0.018289	0.163792	0.995226	2611	0.00994	0.018876	0.598511	0.98792	2559	0.004035	0.020526	0.844182	0.983658
Colorectal cancer	Concentration of very small VLDL particles	4758	0.025242	0.014043	0.072312	0.445308	2927	0.042057	0.017617	0.01704	0.093313	2611	0.053618	0.018512	0.003807	0.021396	2559	0.003579	0.019591	0.855066	0.989619
Colorectal cancer	Conjugated linoleic acid	4753	0.008513	0.014547	0.558435	0.733944	2922	0.02007	0.018	0.264947	0.432183	2601	0.002917	0.019051	0.878323	0.93548
Colon cancer	Conjugated linoleic acid	4753	-0.01251	0.01455	0.389885	0.892672	2922	0.013767	0.018131	0.447736	0.680072	2601	0.015835	0.020089	0.430626	0.553063
Proximal colon cancer	Conjugated linoleic acid	4753	-0.0129	0.014782	0.38284	0.901214	2922	0.033878	0.019179	0.077427	0.716767	2601	-0.01024	0.018525	0.580515	0.695409
Distal colon cancer	Conjugated linoleic acid	4753	0.011174	0.01479	0.449983	0.998606	2922	0.051811	0.017754	0.003546	0.407843	2601	0.022215	0.018686	0.234623	0.843178
Rectal cancer	Conjugated linoleic acid	4753	0.00681	0.014646	0.641965	0.999758	2922	0.042106	0.019003	0.026786	0.995226	2601	0.028767	0.019906	0.148532	0.98792
Colon cancer	Creatinine	4752	-0.00684	0.014071	0.627021	0.985666	2925	-0.00042	0.016997	0.980276	0.984556	2610	-0.00915	0.01545	0.553853	0.653262	2559	0.00478	0.016108	0.766675	0.972717
Proximal colon cancer	Creatinine	4752	-0.01887	0.014454	0.191727	0.901214	2925	0.025402	0.017134	0.138294	0.716767	2610	-0.00955	0.015008	0.5247	0.652329	2559	0.003495	0.015393	0.820419	0.974427
Distal colon cancer	Creatinine	4752	0.013075	0.014047	0.352009	0.998606	2925	0.002846	0.016907	0.866345	0.989826	2610	-0.00959	0.015149	0.526934	0.91124	2559	0.002298	0.015307	0.880681	0.983584
Rectal cancer	Creatinine	4752	0.00514	0.014322	0.719713	0.999758	2925	0.018819	0.017529	0.283104	0.995226	2610	0.001866	0.016123	0.907895	0.98792	2559	-0.00198	0.016092	0.901923	0.983658
Colorectal cancer	Creatinine	4752	-0.00012	0.013804	0.993291	0.993291	2925	-0.00148	0.017189	0.931208	0.951902	2610	-0.01457	0.015728	0.354198	0.479209	2559	-0.00741	0.01505	0.622474	0.989619
Colorectal cancer	Degree of unsaturation	4754	0.005887	0.014259	0.679751	0.817659	2923	0.049523	0.018336	0.006956	0.069561	2602	0.013746	0.018337	0.453553	0.573171
Colon cancer	Degree of unsaturation	4754	0.026073	0.014152	0.065479	0.892672	2923	0.061319	0.018808	0.001126	0.258953	2602	0.022984	0.020151	0.254148	0.424197
Proximal colon cancer	Degree of unsaturation	4754	-0.00758	0.015041	0.614541	0.901214	2923	0.025483	0.018281	0.163424	0.716767	2602	0.00619	0.018594	0.739228	0.805255
Rectal cancer	Degree of unsaturation	4754	-0.01829	0.014261	0.199595	0.999758	2923	0.03375	0.018808	0.072844	0.995226	2602	0.026272	0.018938	0.165488	0.98792
Distal colon cancer	Degree of unsaturation	4754	0.001625	0.014579	0.911235	0.998606	2923	0.033611	0.019048	0.077741	0.989826	2602	0.000166	0.018898	0.993002	0.993002
Colorectal cancer	Diacylglycerol	4665	0.006392	0.014093	0.650161	0.815292	2823	0.025843	0.018629	0.165476	0.320853	2544	0.046719	0.019029	0.014151	0.053979
Colon cancer	Diacylglycerol	4665	0.007782	0.014378	0.588368	0.985666	2823	-0.02633	0.018821	0.161944	0.655485	2544	0.033295	0.019783	0.092493	0.238208
Proximal colon cancer	Diacylglycerol	4665	0.01562	0.014698	0.287967	0.901214	2823	-0.00922	0.018831	0.624405	0.880325	2544	0.024456	0.019453	0.208784	0.34547
Distal colon cancer	Diacylglycerol	4665	0.001292	0.013998	0.926463	0.998606	2823	-0.0084	0.0191	0.66031	0.989826	2544	0.037735	0.019273	0.050354	0.821788
Rectal cancer	Diacylglycerol	4665	-0.00084	0.01424	0.953106	0.999758	2823	0.003098	0.019282	0.872358	0.995226	2544	0.031293	0.020057	0.118834	0.98792
Colon cancer	Docosahexaenoic acid	4755	0.018092	0.014307	0.2061	0.892672	2923	0.008437	0.017532	0.630393	0.779487	2602	0.068534	0.018275	0.000181	0.02209	2558	0.030863	0.018527	0.095861	0.663156
Distal colon cancer	Docosahexaenoic acid	4755	-0.01031	0.014517	0.477579	0.998606	2923	0.001959	0.017674	0.911731	0.989826	2602	0.018742	0.018056	0.299352	0.860196	2558	0.026925	0.019016	0.15693	0.777602
Proximal colon cancer	Docosahexaenoic acid	4755	-0.01456	0.014529	0.316459	0.901214	2923	-0.01464	0.017536	0.403707	0.844115	2602	0.01635	0.017931	0.361938	0.495511	2558	0.008348	0.018185	0.646228	0.970622
Rectal cancer	Docosahexaenoic acid	4755	-0.00418	0.014457	0.772298	0.999758	2923	0.006594	0.018171	0.716723	0.995226	2602	0.035923	0.018383	0.050792	0.98792	2558	0.029541	0.019145	0.122963	0.983658
Colorectal cancer	Docosahexaenoic acid	4755	0.022108	0.01413	0.117742	0.445308	2923	0.023922	0.01774	0.17761	0.332978	2602	0.052219	0.018073	0.003892	0.021396	2558	0.011215	0.018234	0.538551	0.989619
Colorectal cancer	Estimated description of fatty acid chain length, not actual carbon number	4754	-0.00144	0.014552	0.921329	0.967606	2917	0.011235	0.018309	0.539491	0.63606	2601	-0.03165	0.019442	0.103712	0.245915
Colon cancer	Estimated description of fatty acid chain length, not actual carbon number	4754	0.007089	0.014713	0.629969	0.985666	2917	0.014079	0.018349	0.442975	0.680072	2601	0.004434	0.01955	0.820602	0.877854
Proximal colon cancer	Estimated description of fatty acid chain length, not actual carbon number	4754	-0.01371	0.01452	0.345189	0.901214	2917	0.014066	0.018302	0.442205	0.847846	2601	-0.00316	0.018683	0.865642	0.906566
Rectal cancer	Estimated description of fatty acid chain length, not actual carbon number	4754	-0.01662	0.014764	0.260241	0.999758	2917	0.043321	0.018563	0.019676	0.995226	2601	0.015109	0.019252	0.432647	0.98792
Distal colon cancer	Estimated description of fatty acid chain length, not actual carbon number	4754	0.015779	0.014752	0.284834	0.998606	2917	0.032624	0.018492	0.077801	0.989826	2601	0.000241	0.018905	0.989824	0.993002
Colon cancer	Free cholesterol in chylomicrons and extremely large VLDL	4758	-0.00025	0.014206	0.98591	0.997663	2927	-0.01761	0.018626	0.344565	0.655485	2611	0.02421	0.019093	0.204899	0.377014	2559	-0.01582	0.019232	0.41068	0.89786
Distal colon cancer	Free cholesterol in chylomicrons and extremely large VLDL	4758	0.001743	0.014354	0.903329	0.998606	2927	-0.01078	0.018409	0.558071	0.989826	2611	0.029769	0.018935	0.116024	0.821788	2559	-0.00703	0.019883	0.723821	0.983584
Rectal cancer	Free cholesterol in chylomicrons and extremely large VLDL	4758	0.000222	0.01416	0.987487	0.999758	2927	0.000113	0.018888	0.995226	0.995226	2611	0.002518	0.019849	0.899062	0.98792	2559	-0.00276	0.020204	0.891473	0.983658
Colorectal cancer	Free cholesterol in chylomicrons and extremely large VLDL	4758	0.019219	0.014102	0.17301	0.445308	2927	0.026275	0.018479	0.155171	0.310342	2611	0.021838	0.019129	0.253721	0.38392	2559	-0.01784	0.019407	0.35793	0.989619
Proximal colon cancer	Free cholesterol in chylomicrons and extremely large VLDL	4758	0.004536	0.014383	0.752479	0.901214	2927	-0.00846	0.018174	0.641688	0.880325	2611	0.028248	0.018931	0.135774	0.267216	2559	0.001477	0.019196	0.938669	0.993758
Proximal colon cancer	Free cholesterol in IDL	4758	0.006774	0.014645	0.643723	0.901214	2927	0.022061	0.017594	0.209987	0.716767	2611	0.038418	0.018261	0.035494	0.13508	2559	0.016905	0.019771	0.392598	0.970622
Colon cancer	Free cholesterol in IDL	4758	0.014218	0.014149	0.315027	0.892672	2927	0.024875	0.017971	0.166416	0.655485	2611	0.04212	0.018865	0.02565	0.098323	2559	0.009794	0.019869	0.622118	0.972717
Distal colon cancer	Free cholesterol in IDL	4758	-0.00338	0.014274	0.812938	0.998606	2927	0.006952	0.017582	0.692567	0.989826	2611	-0.00498	0.018379	0.786608	0.987198	2559	-0.00176	0.019977	0.929947	0.983584
Rectal cancer	Free cholesterol in IDL	4758	0.000961	0.014494	0.947146	0.999758	2927	0.020929	0.017808	0.23999	0.995226	2611	0.002127	0.018918	0.910501	0.98792	2559	0.006373	0.020439	0.755213	0.983658
Colorectal cancer	Free cholesterol in IDL	4758	0.016535	0.014047	0.239208	0.476377	2927	0.041403	0.017713	0.019485	0.100302	2611	0.053338	0.018562	0.004093	0.021396	2559	0.013751	0.019266	0.475451	0.989619
Distal colon cancer	Free cholesterol in large HDL	4758	0.004163	0.014161	0.768781	0.998606	2927	-0.00064	0.017622	0.971249	0.989826	2611	-0.01774	0.017363	0.307128	0.860196	2559	0.036553	0.0174	0.035759	0.49586
Colon cancer	Free cholesterol in large HDL	4758	0.015916	0.014289	0.265377	0.892672	2927	0.021443	0.018228	0.239542	0.655485	2611	0.010885	0.018353	0.55315	0.653262	2559	0.039187	0.017577	0.02587	0.524453
Rectal cancer	Free cholesterol in large HDL	4758	5.71e-05	0.01438	0.996832	0.999758	2927	-0.00106	0.018671	0.954825	0.995226	2611	0.003695	0.017848	0.83601	0.98792	2559	0.025056	0.017678	0.156495	0.983658
Colorectal cancer	Free cholesterol in large HDL	4758	0.004983	0.014152	0.724764	0.850488	2927	-0.01272	0.01762	0.470238	0.59581	2611	-0.01741	0.017039	0.307102	0.428082	2559	-0.0011	0.017117	0.94871	0.989619
Proximal colon cancer	Free cholesterol in large HDL	4758	-0.02045	0.01405	0.145635	0.901214	2927	0.005124	0.017761	0.772988	0.917029	2611	-0.02477	0.016996	0.145211	0.270099	2559	-0.00065	0.016811	0.969387	0.993758
Proximal colon cancer	Free cholesterol in large LDL	4758	0.009783	0.014657	0.504532	0.901214	2927	0.021692	0.017506	0.215382	0.716767	2611	0.042761	0.018139	0.018475	0.1221	2559	0.014338	0.019988	0.47323	0.970622
Colon cancer	Free cholesterol in large LDL	4758	0.01431	0.014165	0.312431	0.892672	2927	0.021595	0.017872	0.227024	0.655485	2611	0.042645	0.01864	0.022225	0.094876	2559	0.006746	0.019964	0.735465	0.972717
Distal colon cancer	Free cholesterol in large LDL	4758	-0.00185	0.014301	0.896887	0.998606	2927	0.007063	0.017436	0.685435	0.989826	2611	-0.00241	0.018143	0.894396	0.987198	2559	-0.00204	0.019963	0.918492	0.983584
Rectal cancer	Free cholesterol in large LDL	4758	0.002128	0.014499	0.883296	0.999758	2927	0.019823	0.017705	0.262956	0.995226	2611	0.001528	0.01871	0.934918	0.98792	2559	0.006021	0.020391	0.767823	0.983658
Colorectal cancer	Free cholesterol in large LDL	4758	0.017503	0.01402	0.211954	0.449888	2927	0.038213	0.017667	0.030622	0.123562	2611	0.053464	0.018454	0.003798	0.021396	2559	0.016487	0.019389	0.395238	0.989619
Colon cancer	Free cholesterol in large VLDL	4758	-0.00134	0.014221	0.92492	0.997663	2927	-0.02251	0.018728	0.229486	0.655485	2611	0.021048	0.019136	0.271486	0.43973	2559	-0.02287	0.018957	0.227777	0.819261
Distal colon cancer	Free cholesterol in large VLDL	4758	0.006105	0.014109	0.665269	0.998606	2927	-0.01348	0.018465	0.465311	0.989826	2611	0.028277	0.018655	0.129701	0.821788	2559	-0.01572	0.019767	0.426418	0.983584
Rectal cancer	Free cholesterol in large VLDL	4758	-0.00057	0.014082	0.967495	0.999758	2927	0.003409	0.018907	0.856928	0.995226	2611	0.007431	0.019849	0.708156	0.98792	2559	-0.00174	0.020033	0.930976	0.983658
Colorectal cancer	Free cholesterol in large VLDL	4758	0.021538	0.014116	0.127137	0.445308	2927	0.023558	0.018523	0.203537	0.362896	2611	0.023277	0.018732	0.214099	0.370246	2559	-0.01216	0.018885	0.519657	0.989619
Proximal colon cancer	Free cholesterol in large VLDL	4758	0.003535	0.014375	0.805752	0.901214	2927	-0.00942	0.018282	0.606388	0.880325	2611	0.028038	0.018909	0.138255	0.267216	2559	0.000125	0.019023	0.994751	0.997764
Distal colon cancer	Free cholesterol in medium HDL	4758	0.027415	0.014486	0.058475	0.998606	2927	0.003775	0.016881	0.823046	0.989826	2611	-0.00604	0.017019	0.722593	0.987198	2559	0.046936	0.018369	0.01067	0.312786
Colon cancer	Free cholesterol in medium HDL	4758	0.036916	0.014755	0.012385	0.733164	2927	0.00859	0.017802	0.629461	0.779487	2611	0.008822	0.017812	0.620444	0.709961	2559	0.014593	0.018368	0.426981	0.917839
Proximal colon cancer	Free cholesterol in medium HDL	4758	0.011662	0.014761	0.429553	0.901214	2927	0.016344	0.017378	0.347042	0.779185	2611	0.001766	0.017381	0.919101	0.94372	2559	0.009829	0.018056	0.586251	0.970622
Rectal cancer	Free cholesterol in medium HDL	4758	0.014515	0.014679	0.322797	0.999758	2927	-0.00788	0.018119	0.663774	0.995226	2611	0.001073	0.017224	0.950308	0.98792	2559	0.023674	0.018675	0.205026	0.983658
Colorectal cancer	Free cholesterol in medium HDL	4758	0.022248	0.014444	0.123552	0.445308	2927	0.001739	0.017596	0.921286	0.945963	2611	0.006583	0.01648	0.6896	0.77749	2559	-0.00843	0.017857	0.636876	0.989619
Proximal colon cancer	Free cholesterol in medium LDL	4758	0.016531	0.014713	0.261245	0.901214	2927	0.022046	0.017523	0.208438	0.716767	2611	0.0479	0.018334	0.009038	0.118838	2559	0.008508	0.019998	0.670553	0.970622
Colon cancer	Free cholesterol in medium LDL	4758	0.014538	0.014234	0.307125	0.892672	2927	0.014535	0.01792	0.417376	0.671303	2611	0.043627	0.018665	0.019497	0.091518	2559	0.001958	0.02004	0.922184	0.972717
Distal colon cancer	Free cholesterol in medium LDL	4758	0.004528	0.014157	0.74911	0.998606	2927	0.005417	0.017378	0.755275	0.989826	2611	0.000852	0.018086	0.962434	0.987198	2559	0.000779	0.019686	0.968426	0.983584
Rectal cancer	Free cholesterol in medium LDL	4758	0.004536	0.014476	0.754017	0.999758	2927	0.019602	0.017919	0.274084	0.995226	2611	0.000487	0.018789	0.979329	0.98792	2559	0.006117	0.019974	0.759434	0.983658
Colorectal cancer	Free cholesterol in medium LDL	4758	0.022259	0.014126	0.11515	0.445308	2927	0.041158	0.017778	0.020676	0.102102	2611	0.056748	0.018722	0.00246	0.021396	2559	0.017149	0.019726	0.384726	0.989619
Colon cancer	Free cholesterol in medium VLDL	4758	0.000603	0.014282	0.966347	0.997663	2927	-0.023	0.018844	0.222443	0.655485	2611	0.022177	0.019136	0.24659	0.417028	2559	-0.02659	0.019465	0.172032	0.807401
Proximal colon cancer	Free cholesterol in medium VLDL	4758	0.005412	0.014406	0.707165	0.901214	2927	-0.00948	0.018593	0.610235	0.880325	2611	0.030623	0.018943	0.106097	0.253515	2559	0.009949	0.019288	0.606046	0.970622
Distal colon cancer	Free cholesterol in medium VLDL	4758	0.009359	0.014063	0.505763	0.998606	2927	-0.01419	0.018479	0.442536	0.989826	2611	0.025421	0.018686	0.173806	0.821788	2559	-0.00364	0.019943	0.855029	0.983584
Rectal cancer	Free cholesterol in medium VLDL	4758	0.00087	0.014058	0.950658	0.999758	2927	0.007198	0.018963	0.704308	0.995226	2611	0.009325	0.019769	0.637187	0.98792	2559	-0.01235	0.019955	0.536006	0.983658
Colorectal cancer	Free cholesterol in medium VLDL	4758	0.023275	0.014072	0.098194	0.445308	2927	0.02565	0.018513	0.166006	0.320853	2611	0.027923	0.018618	0.133786	0.277666	2559	-0.01448	0.019287	0.453013	0.989619
Distal colon cancer	Free cholesterol in small HDL	4758	0.015927	0.014095	0.258537	0.998606	2927	-0.00443	0.018718	0.812922	0.989826	2611	-0.00304	0.018296	0.867918	0.987198	2559	0.038319	0.01926	0.046748	0.499884
Colon cancer	Free cholesterol in small HDL	4758	0.01471	0.014634	0.31486	0.892672	2927	-0.01593	0.018888	0.399048	0.66508	2611	0.00503	0.018822	0.789306	0.84832	2559	-0.00818	0.019333	0.67217	0.972717
Rectal cancer	Free cholesterol in small HDL	4758	0.009531	0.014364	0.507049	0.999758	2927	-0.0147	0.01881	0.434719	0.995226	2611	-0.00326	0.01835	0.858891	0.98792	2559	0.01251	0.019538	0.522045	0.983658
Colorectal cancer	Free cholesterol in small HDL	4758	0.011339	0.014238	0.425867	0.619933	2927	-0.02081	0.01812	0.250785	0.412004	2611	-0.01185	0.017273	0.492732	0.615801	2559	-0.01745	0.019132	0.361807	0.989619
Proximal colon cancer	Free cholesterol in small HDL	4758	0.012433	0.01493	0.405016	0.901214	2927	0.006779	0.018719	0.717262	0.917029	2611	0.004864	0.018323	0.790659	0.845821	2559	0.003387	0.019494	0.862075	0.990941
Proximal colon cancer	Free cholesterol in small LDL	4758	0.022455	0.014842	0.130353	0.901214	2927	0.028922	0.017691	0.102192	0.716767	2611	0.048095	0.018609	0.009807	0.118838	2559	0.007562	0.019871	0.703556	0.970622
Colon cancer	Free cholesterol in small LDL	4758	0.017288	0.014406	0.230189	0.892672	2927	0.012196	0.018156	0.501807	0.721348	2611	0.042365	0.018777	0.024139	0.09666	2559	0.001861	0.020071	0.92614	0.972717
Distal colon cancer	Free cholesterol in small LDL	4758	0.011854	0.014135	0.401692	0.998606	2927	0.005952	0.017426	0.732705	0.989826	2611	-0.00425	0.018219	0.815395	0.987198	2559	0.003913	0.019564	0.841501	0.983584
Rectal cancer	Free cholesterol in small LDL	4758	0.006154	0.014502	0.671345	0.999758	2927	0.021137	0.018123	0.243585	0.995226	2611	-0.00151	0.019018	0.936742	0.98792	2559	0.005494	0.019819	0.78164	0.983658
Colorectal cancer	Free cholesterol in small LDL	4758	0.025828	0.014409	0.073112	0.445308	2927	0.044591	0.01795	0.013042	0.093313	2611	0.06	0.019138	0.001737	0.021396	2559	0.014917	0.01983	0.451972	0.989619
Colon cancer	Free cholesterol in small VLDL	4758	-0.00048	0.014385	0.973124	0.997663	2927	-0.01944	0.018327	0.288834	0.655485	2611	0.033715	0.019193	0.079097	0.215281	2559	-0.02008	0.019541	0.304148	0.89786
Proximal colon cancer	Free cholesterol in small VLDL	4758	0.012537	0.014544	0.388749	0.901214	2927	0.003579	0.018395	0.845763	0.958254	2611	0.044481	0.019081	0.019821	0.1221	2559	0.01575	0.019708	0.424288	0.970622
Distal colon cancer	Free cholesterol in small VLDL	4758	0.006428	0.013948	0.644936	0.998606	2927	-0.01045	0.018403	0.570308	0.989826	2611	0.015597	0.018405	0.39683	0.87548	2559	0.001865	0.019913	0.925384	0.983584
Rectal cancer	Free cholesterol in small VLDL	4758	-0.0011	0.014034	0.937416	0.999758	2927	0.012267	0.018881	0.515949	0.995226	2611	0.008767	0.019616	0.654966	0.98792	2559	0.001483	0.020007	0.940932	0.983658
Colorectal cancer	Free cholesterol in small VLDL	4758	0.021252	0.013998	0.12901	0.445308	2927	0.032926	0.018338	0.072672	0.216582	2611	0.040581	0.018615	0.029345	0.101356	2559	-0.00305	0.0192	0.873872	0.989619
Colon cancer	Free cholesterol in very large HDL	4758	0.005781	0.014085	0.681474	0.997663	2927	0.020064	0.018212	0.2707	0.655485	2611	0.03141	0.018951	0.097555	0.243887	2559	0.034226	0.018056	0.058124	0.648086
Distal colon cancer	Free cholesterol in very large HDL	4758	-0.00738	0.014389	0.608012	0.998606	2927	-0.00836	0.017197	0.626709	0.989826	2611	-0.01154	0.017949	0.520305	0.91124	2559	0.02282	0.017588	0.194569	0.834403
Proximal colon cancer	Free cholesterol in very large HDL	4758	-0.02112	0.01418	0.136473	0.901214	2927	0.001223	0.017756	0.945075	0.986544	2611	-0.01363	0.017708	0.441574	0.570573	2559	-0.00543	0.017102	0.750711	0.970622
Rectal cancer	Free cholesterol in very large HDL	4758	-0.00818	0.014463	0.571763	0.999758	2927	0.000262	0.018552	0.98873	0.995226	2611	0.003097	0.018382	0.866223	0.98792	2559	0.022192	0.017693	0.209847	0.983658
Colorectal cancer	Free cholesterol in very large HDL	4758	0.003538	0.013907	0.799196	0.904883	2927	0.003175	0.017704	0.857665	0.904876	2611	-0.01222	0.017958	0.496274	0.615801	2559	0.003429	0.017905	0.848127	0.989619
Colon cancer	Free cholesterol in very large VLDL	4758	0.001313	0.014218	0.926423	0.997663	2927	-0.01712	0.018597	0.357231	0.655485	2611	0.02527	0.019105	0.186046	0.356659	2559	-0.01325	0.019162	0.489473	0.967608
Proximal colon cancer	Free cholesterol in very large VLDL	4758	0.005509	0.014413	0.702298	0.901214	2927	-0.00531	0.018195	0.770294	0.917029	2611	0.029678	0.019018	0.118754	0.262628	2559	-0.00493	0.019525	0.800872	0.970622
Distal colon cancer	Free cholesterol in very large VLDL	4758	0.004533	0.014259	0.750571	0.998606	2927	-0.01002	0.018541	0.588795	0.989826	2611	0.028503	0.018965	0.132985	0.821788	2559	-0.0088	0.019579	0.653013	0.983584
Rectal cancer	Free cholesterol in very large VLDL	4758	0.001562	0.014145	0.91209	0.999758	2927	0.001125	0.01894	0.95263	0.995226	2611	0.001778	0.019918	0.928864	0.98792	2559	-0.00415	0.020209	0.837438	0.983658
Colorectal cancer	Free cholesterol in very large VLDL	4758	0.020572	0.014074	0.143879	0.445308	2927	0.028161	0.018484	0.127735	0.299787	2611	0.023606	0.019207	0.219165	0.370647	2559	-0.0239	0.019084	0.210532	0.989619
Proximal colon cancer	Free cholesterol in very small VLDL	4758	0.00961	0.014812	0.516509	0.901214	2927	0.031422	0.017758	0.076922	0.716767	2611	0.036215	0.018951	0.05611	0.165634	2559	0.022198	0.020096	0.26944	0.970622
Distal colon cancer	Free cholesterol in very small VLDL	4758	0.010585	0.014251	0.457677	0.998606	2927	0.008686	0.018017	0.629794	0.989826	2611	-0.01503	0.018486	0.416412	0.87548	2559	-0.00479	0.020004	0.810874	0.983584
Rectal cancer	Free cholesterol in very small VLDL	4758	0.003753	0.014488	0.795632	0.999758	2927	0.026677	0.01792	0.136678	0.995226	2611	0.003079	0.019	0.871287	0.98792	2559	0.00356	0.020585	0.862701	0.983658
Colorectal cancer	Free cholesterol in very small VLDL	4758	0.027002	0.014374	0.06037	0.445308	2927	0.053492	0.017953	0.00291	0.047649	2611	0.060547	0.019072	0.001518	0.021396	2559	0.009519	0.01952	0.625851	0.989619
Colon cancer	Free cholesterol in very small VLDL	4758	0.018982	0.014366	0.186463	0.892672	2927	0.016664	0.018312	0.362886	0.655485	2611	0.036955	0.019123	0.0534	0.168246	2559	0.0002	0.020018	0.992038	0.992038
Colon cancer	Free cholesterol to total lipids ratio in chylomicrons and extremely large VLDL	4758	-0.00076	0.014233	0.957232	0.997663	2927	-0.00922	0.01861	0.620165	0.779442	2611	0.017497	0.01873	0.3503	0.485355	2559	-0.01759	0.01924	0.360618	0.89786
Distal colon cancer	Free cholesterol to total lipids ratio in chylomicrons and extremely large VLDL	4758	-0.00511	0.014731	0.728931	0.998606	2927	-0.01215	0.017923	0.497857	0.989826	2611	0.013651	0.018976	0.471977	0.887047	2559	-0.00892	0.019284	0.64367	0.983584
Rectal cancer	Free cholesterol to total lipids ratio in chylomicrons and extremely large VLDL	4758	0.003487	0.014388	0.808515	0.999758	2927	0.002329	0.017951	0.896791	0.995226	2611	0.000974	0.01938	0.959905	0.98792	2559	-0.00216	0.019203	0.910326	0.983658
Colorectal cancer	Free cholesterol to total lipids ratio in chylomicrons and extremely large VLDL	4758	0.009697	0.014248	0.496144	0.679245	2927	-0.00017	0.017948	0.992519	0.992519	2611	0.002771	0.018764	0.882602	0.93548	2559	-0.0256	0.019573	0.190982	0.989619
Proximal colon cancer	Free cholesterol to total lipids ratio in chylomicrons and extremely large VLDL	4758	-0.00879	0.014713	0.550265	0.901214	2927	-0.00417	0.017639	0.813102	0.930416	2611	0.024278	0.01805	0.178746	0.302291	2559	-0.00056	0.019147	0.976559	0.993758
Colon cancer	Free cholesterol to total lipids ratio in IDL	4758	0.004077	0.014375	0.776722	0.997663	2927	0.03764	0.019018	0.047884	0.655485	2611	0.013359	0.019336	0.489693	0.608808	2559	0.039423	0.019269	0.040864	0.592474
Proximal colon cancer	Free cholesterol to total lipids ratio in IDL	4758	-0.00589	0.014432	0.683025	0.901214	2927	0.020727	0.018217	0.2553	0.716767	2611	-0.00559	0.018454	0.761904	0.818869	2559	0.009156	0.018812	0.626518	0.970622
Distal colon cancer	Free cholesterol to total lipids ratio in IDL	4758	-0.01437	0.014572	0.32421	0.998606	2927	0.006249	0.018012	0.728669	0.989826	2611	-0.02516	0.018427	0.172298	0.821788	2559	0.015798	0.019649	0.421462	0.983584
Rectal cancer	Free cholesterol to total lipids ratio in IDL	4758	-0.00973	0.014452	0.500984	0.999758	2927	0.013345	0.018352	0.467181	0.995226	2611	-0.0038	0.019352	0.844172	0.98792	2559	0.009065	0.019495	0.641975	0.983658
Colorectal cancer	Free cholesterol to total lipids ratio in IDL	4758	-0.01071	0.014083	0.447161	0.625643	2927	0.017172	0.018308	0.348336	0.503723	2611	0.018355	0.018361	0.317575	0.440013	2559	0.02466	0.018706	0.187537	0.989619
Colon cancer	Free cholesterol to total lipids ratio in large HDL	4758	0.005603	0.014268	0.694556	0.997663	2927	0.013712	0.018921	0.468699	0.69103	2611	-0.01548	0.019469	0.426526	0.551427	2559	0.038601	0.018207	0.034095	0.584865
Distal colon cancer	Free cholesterol to total lipids ratio in large HDL	4758	0.009674	0.01429	0.498462	0.998606	2927	0.006994	0.018449	0.704625	0.989826	2611	-0.0227	0.018603	0.222472	0.839813	2559	0.031582	0.017988	0.079263	0.707025
Proximal colon cancer	Free cholesterol to total lipids ratio in large HDL	4758	-0.01185	0.014272	0.406448	0.901214	2927	-0.00613	0.018423	0.739292	0.917029	2611	-0.0347	0.018366	0.058931	0.168882	2559	-0.00848	0.017627	0.630368	0.970622
Rectal cancer	Free cholesterol to total lipids ratio in large HDL	4758	-0.00515	0.014177	0.71659	0.999758	2927	0.004414	0.018829	0.81469	0.995226	2611	-0.00654	0.019444	0.73669	0.98792	2559	0.018895	0.018171	0.298507	0.983658
Colorectal cancer	Free cholesterol to total lipids ratio in large HDL	4758	0.000279	0.014267	0.984372	0.990357	2927	0.003642	0.017784	0.837761	0.896209	2611	-0.00971	0.019148	0.611965	0.718122	2559	0.005615	0.017799	0.752437	0.989619
Colon cancer	Free cholesterol to total lipids ratio in large LDL	4758	-0.00353	0.014368	0.805991	0.997663	2927	0.012901	0.018349	0.482068	0.706214	2611	-0.04531	0.01845	0.014125	0.074972	2559	0.013382	0.019753	0.498187	0.967608
Proximal colon cancer	Free cholesterol to total lipids ratio in large LDL	4758	-0.00553	0.014817	0.709183	0.901214	2927	-0.00488	0.017878	0.784892	0.920488	2611	-0.03664	0.01814	0.043515	0.156384	2559	-0.01315	0.019962	0.510141	0.970622
Distal colon cancer	Free cholesterol to total lipids ratio in large LDL	4758	-0.00961	0.014274	0.500667	0.998606	2927	0.009243	0.018357	0.614644	0.989826	2611	-0.02374	0.018298	0.194658	0.821788	2559	-0.00855	0.020107	0.67087	0.983584
Rectal cancer	Free cholesterol to total lipids ratio in large LDL	4758	-0.00323	0.014307	0.821123	0.999758	2927	-0.00857	0.018534	0.643847	0.995226	2611	-0.01449	0.019209	0.450772	0.98792	2559	-0.00555	0.0203	0.784714	0.983658
Colorectal cancer	Free cholesterol to total lipids ratio in large LDL	4758	-0.01669	0.013967	0.232059	0.46819	2927	-0.02163	0.017951	0.22835	0.389041	2611	-0.03222	0.018221	0.077099	0.208622	2559	0.007262	0.019367	0.707713	0.989619
Colon cancer	Free cholesterol to total lipids ratio in large VLDL	4758	-0.00075	0.014202	0.957707	0.997663	2927	-0.01622	0.018523	0.38136	0.662802	2611	0.027197	0.019044	0.153382	0.330634	2559	-0.01787	0.018906	0.344782	0.89786
Distal colon cancer	Free cholesterol to total lipids ratio in large VLDL	4758	-0.00403	0.014371	0.77897	0.998606	2927	-0.01554	0.017986	0.387575	0.989826	2611	0.026414	0.018463	0.152652	0.821788	2559	-0.01512	0.019339	0.434365	0.983584
Rectal cancer	Free cholesterol to total lipids ratio in large VLDL	4758	0.000565	0.014308	0.96853	0.999758	2927	0.001354	0.018529	0.941732	0.995226	2611	0.008295	0.019493	0.670469	0.98792	2559	0.004157	0.019667	0.83263	0.983658
Colorectal cancer	Free cholesterol to total lipids ratio in large VLDL	4758	0.016295	0.014131	0.248919	0.476377	2927	0.024567	0.018157	0.176158	0.332978	2611	0.028786	0.01873	0.124446	0.270024	2559	-0.00639	0.018965	0.736037	0.989619
Proximal colon cancer	Free cholesterol to total lipids ratio in large VLDL	4758	0.003344	0.014581	0.818623	0.901214	2927	-0.0063	0.017788	0.723405	0.917029	2611	0.036044	0.018866	0.056172	0.165634	2559	-5.3e-05	0.018934	0.997764	0.997764
Distal colon cancer	Free cholesterol to total lipids ratio in medium HDL	4758	0.017041	0.014104	0.226992	0.998606	2927	0.016658	0.018793	0.375462	0.989826	2611	-0.00112	0.018363	0.951245	0.987198	2559	0.045263	0.018412	0.014023	0.341475
Colon cancer	Free cholesterol to total lipids ratio in medium HDL	4758	0.02075	0.014394	0.149498	0.892672	2927	0.024151	0.019069	0.205434	0.655485	2611	-0.01576	0.019823	0.426756	0.551427	2559	0.016319	0.018475	0.377149	0.89786
Proximal colon cancer	Free cholesterol to total lipids ratio in medium HDL	4758	0.009803	0.015018	0.513954	0.901214	2927	0.004383	0.01824	0.810141	0.930416	2611	-0.00254	0.019556	0.896787	0.929104	2559	0.005446	0.018125	0.763846	0.970622
Rectal cancer	Free cholesterol to total lipids ratio in medium HDL	4758	-0.00275	0.014326	0.84769	0.999758	2927	0.012671	0.018449	0.49226	0.995226	2611	0.003643	0.019801	0.854035	0.98792	2559	0.02376	0.01864	0.202537	0.983658
Colorectal cancer	Free cholesterol to total lipids ratio in medium HDL	4758	0.015308	0.014668	0.296713	0.509283	2927	0.052224	0.018661	0.005167	0.059422	2611	0.040698	0.019259	0.034682	0.113954	2559	0.000727	0.017873	0.967551	0.989619
Proximal colon cancer	Free cholesterol to total lipids ratio in medium LDL	4758	-0.00164	0.014995	0.91268	0.94557	2927	-0.01577	0.01704	0.354675	0.784377	2611	-0.04554	0.017804	0.010586	0.118838	2559	-0.02508	0.020103	0.212223	0.970622
Colon cancer	Free cholesterol to total lipids ratio in medium LDL	4758	-0.01004	0.014329	0.483556	0.929795	2927	-0.01039	0.017487	0.552609	0.752072	2611	-0.05441	0.018088	0.002655	0.072768	2559	-0.00806	0.019964	0.686389	0.972717
Distal colon cancer	Free cholesterol to total lipids ratio in medium LDL	4758	0.005145	0.014534	0.723366	0.998606	2927	-0.00666	0.01724	0.699207	0.989826	2611	-0.01049	0.017493	0.548685	0.928046	2559	0.000772	0.019952	0.969152	0.983584
Rectal cancer	Free cholesterol to total lipids ratio in medium LDL	4758	0.001376	0.014432	0.92407	0.999758	2927	-0.01449	0.01747	0.406804	0.995226	2611	-0.01029	0.018062	0.568744	0.98792	2559	-0.00756	0.020421	0.711159	0.983658
Colorectal cancer	Free cholesterol to total lipids ratio in medium LDL	4758	-0.01749	0.013996	0.211583	0.449888	2927	-0.03289	0.017357	0.058177	0.191152	2611	-0.05001	0.017869	0.00517	0.024088	2559	-0.00879	0.019647	0.654529	0.989619
Colon cancer	Free cholesterol to total lipids ratio in medium VLDL	4758	0.000886	0.014224	0.950342	0.997663	2927	-0.01469	0.018474	0.426543	0.680072	2611	0.035571	0.018559	0.055399	0.172187	2559	-0.01231	0.019821	0.534615	0.967992
Distal colon cancer	Free cholesterol to total lipids ratio in medium VLDL	4758	-0.00575	0.014486	0.691668	0.998606	2927	-0.01935	0.017711	0.274575	0.989826	2611	0.01388	0.018012	0.44102	0.883142	2559	0.008532	0.019842	0.667244	0.983584
Colorectal cancer	Free cholesterol to total lipids ratio in medium VLDL	4758	0.010627	0.01403	0.448831	0.625643	2927	0.012835	0.017822	0.471467	0.59581	2611	0.026927	0.017734	0.129034	0.274794	2559	-0.00901	0.019635	0.646447	0.989619
Proximal colon cancer	Free cholesterol to total lipids ratio in medium VLDL	4758	-0.00277	0.014656	0.850276	0.901214	2927	0.00018	0.017783	0.991913	0.997618	2611	0.028194	0.018147	0.120385	0.263622	2559	-0.0015	0.019391	0.938365	0.993758
Rectal cancer	Free cholesterol to total lipids ratio in medium VLDL	4758	-0.00231	0.014388	0.872461	0.999758	2927	0.006799	0.018225	0.709118	0.995226	2611	0.011921	0.018824	0.526598	0.98792	2559	-0.00043	0.02037	0.983179	0.99412
Distal colon cancer	Free cholesterol to total lipids ratio in small HDL	4758	-0.00583	0.014367	0.68494	0.998606	2927	-0.02221	0.018109	0.220042	0.989826	2611	-0.02779	0.018739	0.138213	0.821788	2559	0.037637	0.018945	0.047074	0.499884
Colon cancer	Free cholesterol to total lipids ratio in small HDL	4758	-0.00761	0.014132	0.590436	0.985666	2927	-0.00213	0.018147	0.906478	0.946348	2611	-0.02637	0.019075	0.166957	0.339824	2559	0.027527	0.019593	0.16016	0.799798
Proximal colon cancer	Free cholesterol to total lipids ratio in small HDL	4758	-0.02301	0.014542	0.113631	0.901214	2927	-0.01333	0.017732	0.452137	0.847846	2611	-0.05402	0.018871	0.004234	0.118838	2559	-0.01022	0.019477	0.599651	0.970622
Rectal cancer	Free cholesterol to total lipids ratio in small HDL	4758	-0.01212	0.014497	0.403362	0.999758	2927	-0.01446	0.018107	0.42463	0.995226	2611	-0.00859	0.018836	0.648441	0.98792	2559	0.023018	0.02011	0.252488	0.983658
Colorectal cancer	Free cholesterol to total lipids ratio in small HDL	4758	-0.00027	0.013863	0.984377	0.990357	2927	0.007611	0.01755	0.664559	0.752949	2611	-0.05165	0.018218	0.00462	0.023098	2559	-0.01051	0.019428	0.588552	0.989619
Proximal colon cancer	Free cholesterol to total lipids ratio in small LDL	4758	0.002967	0.01498	0.842992	0.901214	2927	-0.01056	0.016965	0.533781	0.870598	2611	-0.04153	0.017736	0.019284	0.1221	2559	-0.02872	0.019998	0.15105	0.970622
Colon cancer	Free cholesterol to total lipids ratio in small LDL	4758	-0.0092	0.014303	0.520041	0.964593	2927	-0.00872	0.017497	0.61844	0.779442	2611	-0.05363	0.01799	0.002901	0.072768	2559	-0.00929	0.019925	0.641126	0.972717
Distal colon cancer	Free cholesterol to total lipids ratio in small LDL	4758	0.006098	0.014593	0.676088	0.998606	2927	-0.00613	0.017214	0.72197	0.989826	2611	-0.01592	0.017382	0.35972	0.860196	2559	0.001718	0.01975	0.93069	0.983584
Rectal cancer	Free cholesterol to total lipids ratio in small LDL	4758	-0.00081	0.014441	0.955239	0.999758	2927	-0.01209	0.017458	0.488772	0.995226	2611	-0.01822	0.018192	0.316714	0.98792	2559	-0.00853	0.020303	0.674363	0.983658
Colorectal cancer	Free cholesterol to total lipids ratio in small LDL	4758	-0.01615	0.014071	0.251133	0.476377	2927	-0.02889	0.017361	0.096153	0.257153	2611	-0.04847	0.017625	0.006	0.026632	2559	-0.00875	0.01966	0.656273	0.989619
Distal colon cancer	Free cholesterol to total lipids ratio in small VLDL	4758	-4.6e-05	0.014489	0.997454	0.998606	2927	-0.00184	0.017339	0.915566	0.989826	2611	-0.02694	0.017118	0.115665	0.821788	2559	0.034023	0.018963	0.072908	0.677435
Proximal colon cancer	Free cholesterol to total lipids ratio in small VLDL	4758	-0.00547	0.014296	0.702037	0.901214	2927	0.021144	0.017793	0.234799	0.716767	2611	0.004	0.016401	0.807347	0.859675	2559	0.005375	0.018534	0.771816	0.970622
Colon cancer	Free cholesterol to total lipids ratio in small VLDL	4758	0.008532	0.014222	0.548603	0.97813	2927	0.011323	0.018271	0.535487	0.74194	2611	0.014277	0.017595	0.41721	0.548333	2559	0.008028	0.018823	0.669771	0.972717
Rectal cancer	Free cholesterol to total lipids ratio in small VLDL	4758	0.003343	0.014527	0.818022	0.999758	2927	0.012635	0.018501	0.494691	0.995226	2611	-0.00141	0.01788	0.937143	0.98792	2559	0.028635	0.018586	0.123515	0.983658
Colorectal cancer	Free cholesterol to total lipids ratio in small VLDL	4758	-0.00186	0.014248	0.896274	0.954366	2927	-0.0118	0.017449	0.498788	0.626892	2611	-0.00251	0.016981	0.882605	0.93548	2559	0.013827	0.018357	0.451377	0.989619
Colon cancer	Free cholesterol to total lipids ratio in very large HDL	4758	-0.00698	0.014235	0.623843	0.985666	2927	-0.00415	0.018491	0.822611	0.911419	2611	-0.00291	0.019591	0.882079	0.924918	2559	0.02315	0.01862	0.213875	0.819261
Proximal colon cancer	Free cholesterol to total lipids ratio in very large HDL	4758	-0.01322	0.014427	0.359566	0.901214	2927	-0.02836	0.017795	0.111118	0.716767	2611	-0.01922	0.018275	0.293028	0.434816	2559	-0.01686	0.017851	0.345095	0.970622
Distal colon cancer	Free cholesterol to total lipids ratio in very large HDL	4758	0.003121	0.014332	0.827601	0.998606	2927	-0.01645	0.018578	0.376008	0.989826	2611	-0.00312	0.018565	0.866574	0.987198	2559	0.004887	0.01821	0.788436	0.983584
Rectal cancer	Free cholesterol to total lipids ratio in very large HDL	4758	-0.00314	0.014584	0.829468	0.999758	2927	0.001984	0.019233	0.917829	0.995226	2611	-0.00066	0.019789	0.973584	0.98792	2559	0.015426	0.018683	0.409069	0.983658
Colorectal cancer	Free cholesterol to total lipids ratio in very large HDL	4758	0.010763	0.014059	0.443965	0.625643	2927	0.006659	0.018256	0.715301	0.806467	2611	-0.03195	0.019125	0.0949	0.232822	2559	0.008231	0.018455	0.65562	0.989619
Proximal colon cancer	Free cholesterol to total lipids ratio in very large VLDL	4758	0.006839	0.01425	0.631331	0.901214	2927	0.04371	0.017421	0.012158	0.716767	2611	0.010021	0.018383	0.585698	0.697982	2559	-0.01012	0.019699	0.607331	0.970622
Colon cancer	Free cholesterol to total lipids ratio in very large VLDL	4758	0.013725	0.014321	0.33794	0.892672	2927	0.03811	0.017546	0.029938	0.655485	2611	0.027195	0.018047	0.131961	0.294775	2559	0.010517	0.019269	0.585243	0.972717
Distal colon cancer	Free cholesterol to total lipids ratio in very large VLDL	4758	-0.00189	0.014756	0.898091	0.998606	2927	0.019057	0.017573	0.278255	0.989826	2611	0.002229	0.018457	0.903888	0.987198	2559	-0.0013	0.019148	0.945959	0.983584
Rectal cancer	Free cholesterol to total lipids ratio in very large VLDL	4758	0.001958	0.014419	0.891983	0.999758	2927	0.01263	0.017857	0.479441	0.995226	2611	-0.00789	0.018499	0.669665	0.98792	2559	0.013191	0.019751	0.504294	0.983658
Colorectal cancer	Free cholesterol to total lipids ratio in very large VLDL	4758	-0.0079	0.01447	0.585226	0.764784	2927	0.027663	0.017962	0.123652	0.296249	2611	0.017349	0.018593	0.350856	0.477496	2559	-0.00617	0.019449	0.751275	0.989619
Colon cancer	Free cholesterol to total lipids ratio in very small VLDL	4758	0.011643	0.014403	0.418891	0.901474	2927	0.019399	0.019101	0.309898	0.655485	2611	-0.00589	0.019497	0.762782	0.829487	2559	0.023625	0.019449	0.224585	0.819261
Distal colon cancer	Free cholesterol to total lipids ratio in very small VLDL	4758	0.006262	0.014534	0.6666	0.998606	2927	-0.00446	0.018351	0.808026	0.989826	2611	-0.0513	0.019382	0.008172	0.821788	2559	0.018797	0.019852	0.343802	0.953558
Proximal colon cancer	Free cholesterol to total lipids ratio in very small VLDL	4758	-0.00701	0.014654	0.632221	0.901214	2927	0.022604	0.017912	0.20708	0.716767	2611	-0.03516	0.019227	0.067579	0.186044	2559	0.017241	0.019125	0.367421	0.970622
Colorectal cancer	Free cholesterol to total lipids ratio in very small VLDL	4758	-0.00369	0.014197	0.79487	0.904883	2927	0.016099	0.01797	0.370384	0.525854	2611	-0.00849	0.01903	0.655416	0.746266	2559	0.018725	0.019226	0.330191	0.989619
Rectal cancer	Free cholesterol to total lipids ratio in very small VLDL	4758	-0.00798	0.014385	0.579017	0.999758	2927	0.008886	0.018346	0.628169	0.995226	2611	-0.01821	0.019482	0.350087	0.98792	2559	0.000365	0.019687	0.985204	0.99412
Proximal colon cancer	Glucose	4737	-0.01281	0.014824	0.387714	0.901214	2920	0.034312	0.017679	0.052375	0.716767	2610	0.021782	0.018152	0.230271	0.372973	2555	0.006495	0.019011	0.732655	0.970622
Colon cancer	Glucose	4737	-0.00351	0.014404	0.807321	0.997663	2920	0.014649	0.017713	0.408302	0.66562	2610	0.029303	0.018454	0.112424	0.272185	2555	0.010276	0.018898	0.586641	0.972717
Distal colon cancer	Glucose	4737	0.009152	0.014343	0.523443	0.998606	2920	0.012004	0.017643	0.496333	0.989826	2610	0.012617	0.017939	0.481926	0.887047	2555	-0.00259	0.018597	0.889237	0.983584
Rectal cancer	Glucose	4737	0.008733	0.01453	0.547849	0.999758	2920	0.025401	0.017839	0.154572	0.995226	2610	0.024096	0.01832	0.188527	0.98792	2555	0.001959	0.018772	0.916904	0.983658
Colorectal cancer	Glucose	4737	-0.0031	0.014584	0.831935	0.914492	2920	0.013552	0.018538	0.4648	0.59581	2610	0.018547	0.018918	0.326963	0.450309	2555	-0.01418	0.018933	0.454048	0.989619
Colon cancer	Glutamine	4751	-0.01516	0.014219	0.286418	0.892672	2926	-0.04451	0.018585	0.016676	0.655485	2610	-0.0373	0.017289	0.031049	0.111583	2516	-0.01916	0.017996	0.287203	0.89786
Distal colon cancer	Glutamine	4751	-0.00571	0.014342	0.690443	0.998606	2926	-0.0346	0.017512	0.048256	0.989826	2610	-0.00734	0.017261	0.670639	0.987198	2516	0.003073	0.017817	0.863063	0.983584
Rectal cancer	Glutamine	4751	-0.00365	0.014506	0.801253	0.999758	2926	-0.01399	0.01828	0.444023	0.995226	2610	-0.01885	0.017471	0.280825	0.98792	2516	0.009343	0.018662	0.616656	0.983658
Colorectal cancer	Glutamine	4751	-0.00131	0.014263	0.926767	0.968893	2926	-0.01452	0.017358	0.402918	0.54869	2610	-0.0139	0.016921	0.411318	0.531478	2516	-0.01481	0.017385	0.394237	0.989619
Proximal colon cancer	Glutamine	4751	-0.02272	0.014233	0.110551	0.901214	2926	0.001455	0.017426	0.933459	0.981265	2610	-0.02677	0.016601	0.106917	0.253515	2516	-0.00098	0.017412	0.954895	0.993758
Colon cancer	Glycoprotein acetyls	4759	-0.00573	0.014132	0.684954	0.997663	2925	-0.01408	0.01802	0.434668	0.680072	2610	0.006031	0.019285	0.754501	0.826358	2559	-0.01328	0.019646	0.498991	0.967608
Proximal colon cancer	Glycoprotein acetyls	4759	-0.00352	0.014612	0.809826	0.901214	2925	-0.00226	0.018189	0.901199	0.981265	2610	0.020621	0.017966	0.251166	0.394826	2559	-0.00547	0.019703	0.78121	0.970622
Distal colon cancer	Glycoprotein acetyls	4759	0.023544	0.013925	0.09096	0.998606	2925	-0.00059	0.017896	0.973909	0.989826	2610	0.026982	0.018091	0.135951	0.821788	2559	0.004425	0.02029	0.82738	0.983584
Rectal cancer	Glycoprotein acetyls	4759	0.002193	0.014301	0.878117	0.999758	2925	-0.01252	0.018645	0.502071	0.995226	2610	0.020609	0.018708	0.270711	0.98792	2559	-0.0013	0.020033	0.948066	0.983658
Colorectal cancer	Glycoprotein acetyls	4759	-0.00039	0.014214	0.977989	0.990357	2925	0.023943	0.017808	0.178876	0.332978	2610	0.029232	0.018309	0.110479	0.252456	2559	-0.02261	0.019457	0.24525	0.989619
Distal colon cancer	HDL cholesterol	4758	0.008662	0.014101	0.539051	0.998606	2927	-0.00099	0.017253	0.954062	0.989826	2611	-0.01324	0.017058	0.437568	0.883142	2559	0.041708	0.017639	0.018129	0.341475
Colon cancer	HDL cholesterol	4758	0.021275	0.014332	0.137763	0.892672	2927	0.014302	0.018293	0.434387	0.680072	2611	0.019201	0.017935	0.284468	0.448134	2559	0.028655	0.017767	0.106895	0.681073
Rectal cancer	HDL cholesterol	4758	0.002201	0.014469	0.87909	0.999758	2927	-0.00234	0.018484	0.899325	0.995226	2611	0.002794	0.017327	0.871927	0.98792	2559	0.027294	0.017904	0.127526	0.983658
Colorectal cancer	HDL cholesterol	4758	0.00934	0.014044	0.506054	0.683745	2927	-0.01156	0.017658	0.512791	0.63606	2611	-0.00789	0.016445	0.631446	0.726163	2559	0.001198	0.017064	0.944045	0.989619
Proximal colon cancer	HDL cholesterol	4758	-0.00634	0.014218	0.65557	0.901214	2927	0.012419	0.017438	0.476404	0.850398	2611	-0.00826	0.01657	0.618198	0.725437	2559	0.000544	0.016972	0.974438	0.993758
Proximal colon cancer	Histidine	4753	-0.0014	0.014894	0.92514	0.951387	2751	-0.01005	0.018615	0.589384	0.880249	2610	0.00103	0.018571	0.955762	0.968912	2559	-0.00846	0.019301	0.661241	0.970622
Colon cancer	Histidine	4753	0.010268	0.014262	0.471569	0.922951	2751	-0.01166	0.019019	0.540035	0.743761	2610	-0.001	0.019019	0.958018	0.975731	2559	-0.00209	0.019557	0.915009	0.972717
Distal colon cancer	Histidine	4753	0.004457	0.01462	0.76051	0.998606	2751	-0.00303	0.018072	0.866802	0.989826	2610	0.029414	0.019004	0.121803	0.821788	2559	-0.00295	0.01978	0.881294	0.983584
Rectal cancer	Histidine	4753	-0.0074	0.014321	0.605547	0.999758	2751	0.004971	0.019116	0.794831	0.995226	2610	0.018452	0.019299	0.339106	0.98792	2559	-0.01135	0.019689	0.564509	0.983658
Colorectal cancer	Histidine	4753	-0.00025	0.01424	0.986051	0.990357	2751	0.004365	0.018517	0.813658	0.882742	2610	0.009689	0.018377	0.598065	0.705632	2559	-0.0123	0.018672	0.510086	0.989619
Distal colon cancer	Isoleucine	4759	0.014852	0.014344	0.30053	0.998606	2926	-0.00075	0.017366	0.965731	0.989826	2610	0.021738	0.017197	0.206301	0.821788	2556	0.022436	0.01778	0.207111	0.849074
Proximal colon cancer	Isoleucine	4759	0.009625	0.014835	0.516494	0.901214	2926	0.019197	0.017626	0.276191	0.716767	2610	-0.00891	0.017274	0.605985	0.714752	2556	0.025065	0.017468	0.151422	0.970622
Colon cancer	Isoleucine	4759	0.001631	0.014288	0.909105	0.997663	2926	0.007594	0.017886	0.671203	0.818769	2610	-0.002	0.017724	0.910193	0.942993	2556	0.00707	0.017982	0.694209	0.972717
Rectal cancer	Isoleucine	4759	0.011287	0.01438	0.432524	0.999758	2926	0.012766	0.017814	0.473664	0.995226	2610	0.010901	0.01808	0.546623	0.98792	2556	0.010584	0.018224	0.561436	0.983658
Colorectal cancer	Isoleucine	4759	0.018914	0.014626	0.196012	0.446364	2926	0.01072	0.017617	0.542912	0.63606	2610	-0.00674	0.017327	0.697282	0.782316	2556	0.004745	0.017398	0.785088	0.989619
Colon cancer	Lactate	4759	0.013939	0.01416	0.324958	0.892672	2920	0.010157	0.018246	0.577795	0.763752	2610	0.012395	0.018954	0.513199	0.631207	2559	-0.01929	0.019605	0.325331	0.89786
Proximal colon cancer	Lactate	4759	0.013691	0.014773	0.354106	0.901214	2920	0.006535	0.018138	0.718661	0.917029	2610	-0.01833	0.018868	0.33129	0.464613	2559	-0.00493	0.019417	0.79965	0.970622
Distal colon cancer	Lactate	4759	0.016388	0.014368	0.254073	0.998606	2920	-0.0184	0.017885	0.303754	0.989826	2610	-0.00336	0.019531	0.863356	0.987198	2559	0.005912	0.019264	0.758934	0.983584
Rectal cancer	Lactate	4759	-0.00799	0.014391	0.578809	0.999758	2920	-0.03627	0.018199	0.046363	0.995226	2610	0.010537	0.019288	0.584899	0.98792	2559	-0.00526	0.019523	0.787771	0.983658
Colorectal cancer	Lactate	4759	-0.00059	0.014352	0.966969	0.990357	2920	-0.03043	0.018956	0.108574	0.280586	2610	0.002716	0.020028	0.892148	0.936959	2559	-0.02779	0.019033	0.1444	0.989619
Proximal colon cancer	LDL cholesterol	4758	0.011076	0.014753	0.452843	0.901214	2927	0.021866	0.017442	0.210073	0.716767	2611	0.046304	0.018303	0.01147	0.119912	2559	0.012479	0.020135	0.535479	0.970622
Colon cancer	LDL cholesterol	4758	0.01324	0.014237	0.352442	0.892672	2927	0.018148	0.017803	0.308108	0.655485	2611	0.046287	0.018684	0.013299	0.074602	2559	0.003101	0.02001	0.876843	0.972717
Distal colon cancer	LDL cholesterol	4758	-0.00043	0.014331	0.976261	0.998606	2927	0.006508	0.017415	0.708648	0.989826	2611	0.002714	0.018105	0.880852	0.987198	2559	-0.0012	0.019793	0.951473	0.983584
Rectal cancer	LDL cholesterol	4758	0.001216	0.014471	0.933049	0.999758	2927	0.019849	0.017736	0.263178	0.995226	2611	0.003677	0.018775	0.844741	0.98792	2559	0.00488	0.020235	0.809443	0.983658
Colorectal cancer	LDL cholesterol	4758	0.019728	0.013987	0.158476	0.445308	2927	0.042577	0.017751	0.016524	0.093313	2611	0.056807	0.018589	0.002267	0.021396	2559	0.015778	0.019587	0.420567	0.989619
Distal colon cancer	Leucine	4759	0.004047	0.014439	0.779288	0.998606	2927	0.003335	0.015757	0.832411	0.989826	2610	0.012607	0.015411	0.413384	0.87548	2559	0.020344	0.016558	0.21931	0.858003
Colon cancer	Leucine	4759	-0.00879	0.014121	0.533624	0.97813	2927	0.01606	0.016261	0.32343	0.655485	2610	-0.00654	0.015961	0.6818	0.761233	2559	0.014064	0.01689	0.405108	0.89786
Proximal colon cancer	Leucine	4759	0.000372	0.014702	0.979826	0.986529	2927	0.011452	0.016057	0.475788	0.850398	2610	-0.03061	0.015757	0.052183	0.163782	2559	0.020313	0.016732	0.224859	0.970622
Rectal cancer	Leucine	4759	0.005262	0.014165	0.710312	0.999758	2927	0.010537	0.01625	0.51675	0.995226	2610	0.012547	0.016052	0.434475	0.98792	2559	0.009287	0.017506	0.595809	0.983658
Colorectal cancer	Leucine	4759	0.011375	0.01477	0.441254	0.625643	2927	-0.01539	0.016167	0.341101	0.499702	2610	-0.01343	0.01559	0.38915	0.514393	2559	0.001614	0.016593	0.922525	0.989619
Distal colon cancer	Linoleic acid	4755	0.003758	0.014078	0.789502	0.998606	2919	-0.00252	0.016981	0.882057	0.989826	2601	0.024298	0.017308	0.160475	0.821788	2558	0.026253	0.019683	0.1824	0.797553
Proximal colon cancer	Linoleic acid	4755	-0.00267	0.014668	0.85556	0.902655	2919	0.012713	0.016904	0.452068	0.847846	2601	0.019507	0.017682	0.270036	0.406348	2558	0.024504	0.019498	0.208971	0.970622
Colon cancer	Linoleic acid	4755	-0.00013	0.01424	0.992878	0.997663	2919	0.002587	0.017033	0.879304	0.939789	2601	0.024394	0.018444	0.186083	0.356659	2558	0.007581	0.019702	0.700444	0.972717
Rectal cancer	Linoleic acid	4755	-0.00422	0.014196	0.766292	0.999758	2919	0.010812	0.018088	0.550052	0.995226	2601	0.027406	0.018316	0.134709	0.98792	2558	0.021615	0.020213	0.285008	0.983658
Colorectal cancer	Linoleic acid	4755	0.010877	0.014013	0.437662	0.625643	2919	0.023419	0.017959	0.192335	0.345603	2601	0.01981	0.017946	0.269764	0.392695	2558	0.001081	0.01935	0.955452	0.989619
Distal colon cancer	Monounsaturated fatty acids	4753	0.006819	0.013941	0.624753	0.998606	2919	-0.01213	0.018448	0.511054	0.989826	2602	0.019192	0.017891	0.283503	0.860196	2558	0.021648	0.020152	0.282808	0.928506
Proximal colon cancer	Monounsaturated fatty acids	4753	0.004425	0.014858	0.765844	0.901214	2919	0.003221	0.018039	0.858305	0.962976	2602	0.035659	0.018259	0.050924	0.163782	2558	0.005582	0.019964	0.779788	0.970622
Colon cancer	Monounsaturated fatty acids	4753	0.000106	0.014244	0.994089	0.997663	2919	-0.01876	0.018221	0.303404	0.655485	2602	0.042886	0.018665	0.021663	0.094876	2558	-0.00746	0.019766	0.705768	0.972717
Rectal cancer	Monounsaturated fatty acids	4753	0.001455	0.014111	0.917875	0.999758	2919	0.001552	0.018337	0.932569	0.995226	2602	0.007304	0.019143	0.702842	0.98792	2558	0.01088	0.020207	0.590307	0.983658
Colorectal cancer	Monounsaturated fatty acids	4753	0.024823	0.013952	0.075273	0.445308	2919	0.011254	0.017981	0.531441	0.63606	2602	0.029054	0.01808	0.108179	0.251324	2558	-0.01122	0.019417	0.56329	0.989619
Colon cancer	Omega-3 fatty acids	4755	0.016475	0.014479	0.255221	0.892672	2923	0.031285	0.017523	0.074302	0.655485	2602	0.069747	0.018676	0.000192	0.02209	2558	0.046914	0.019301	0.015139	0.524453
Distal colon cancer	Omega-3 fatty acids	4755	-0.00251	0.014584	0.86349	0.998606	2923	0.006851	0.018014	0.70372	0.989826	2602	0.024814	0.018434	0.178391	0.821788	2558	0.030564	0.019653	0.120019	0.777602
Proximal colon cancer	Omega-3 fatty acids	4755	-0.01651	0.014732	0.262417	0.901214	2923	9.38e-06	0.01769	0.999577	0.999577	2602	0.006011	0.018253	0.741958	0.805255	2558	0.021904	0.019479	0.260905	0.970622
Rectal cancer	Omega-3 fatty acids	4755	-0.00117	0.014454	0.935326	0.999758	2923	0.019717	0.018141	0.277194	0.995226	2602	0.01766	0.019117	0.355661	0.98792	2558	0.02685	0.019925	0.177931	0.983658
Colorectal cancer	Omega-3 fatty acids	4755	0.03402	0.014284	0.017277	0.445308	2923	0.047259	0.018094	0.009051	0.077097	2602	0.074825	0.018543	5.61e-05	0.012912	2558	0.031637	0.019076	0.097341	0.989619
Distal colon cancer	Omega-6 fatty acids	4755	0.001647	0.014239	0.90791	0.998606	2923	-0.00556	0.017033	0.744274	0.989826	2602	0.020579	0.017147	0.230199	0.84041	2558	0.022694	0.019626	0.247664	0.868999
Colon cancer	Omega-6 fatty acids	4755	0.010763	0.014251	0.450135	0.90908	2923	0.012798	0.017106	0.454405	0.680072	2602	0.041913	0.018378	0.022652	0.094876	2558	0.013202	0.019493	0.498293	0.967608
Proximal colon cancer	Omega-6 fatty acids	4755	-0.00484	0.014684	0.741611	0.901214	2923	0.008101	0.016852	0.630745	0.880325	2602	0.025562	0.017655	0.147775	0.270099	2558	0.020801	0.019425	0.284336	0.970622
Rectal cancer	Omega-6 fatty acids	4755	-0.00151	0.014326	0.916329	0.999758	2923	0.007998	0.01806	0.657903	0.995226	2602	0.027081	0.018349	0.140103	0.98792	2558	0.018818	0.020079	0.348748	0.983658
Colorectal cancer	Omega-6 fatty acids	4755	0.023669	0.014022	0.091486	0.445308	2923	0.030253	0.01777	0.08878	0.246366	2602	0.032759	0.017946	0.068053	0.192918	2558	0.008618	0.019083	0.651587	0.989619
Colon cancer	Phenylalanine	4748	0.007542	0.014456	0.601887	0.985666	2925	0.030436	0.018587	0.101648	0.655485	2609	-0.00285	0.018995	0.880854	0.924918	2558	0.041702	0.0196	0.033466	0.584865
Proximal colon cancer	Phenylalanine	4748	0.007788	0.014942	0.602221	0.901214	2925	0.028385	0.018585	0.126802	0.716767	2609	-0.00373	0.018955	0.844148	0.894719	2558	0.038346	0.019538	0.049798	0.970622
Distal colon cancer	Phenylalanine	4748	0.022428	0.014452	0.120756	0.998606	2925	0.029003	0.017865	0.1046	0.989826	2609	0.026884	0.017902	0.133288	0.821788	2558	-0.00188	0.019641	0.923596	0.983584
Rectal cancer	Phenylalanine	4748	0.01349	0.014488	0.351852	0.999758	2925	0.04129	0.019154	0.03119	0.995226	2609	0.04786	0.019105	0.012303	0.98792	2558	-0.01018	0.019895	0.608926	0.983658
Colorectal cancer	Phenylalanine	4748	0.025085	0.014439	0.0824	0.445308	2925	-0.01451	0.017976	0.419628	0.557887	2609	0.02694	0.018171	0.138322	0.27907	2558	0.004201	0.019309	0.82779	0.989619
Distal colon cancer	Phosphatidylcholines	4735	0.006311	0.014779	0.669386	0.998606	2881	-0.00395	0.017038	0.816736	0.989826	2579	0.014437	0.016868	0.392129	0.87548	2558	0.028579	0.019261	0.137991	0.777602
Colon cancer	Phosphatidylcholines	4735	0.019052	0.01424	0.180976	0.892672	2881	0.025089	0.017648	0.155242	0.655485	2579	0.05795	0.017894	0.001217	0.065053	2558	0.014772	0.018962	0.436019	0.917839
Proximal colon cancer	Phosphatidylcholines	4735	-0.01527	0.014769	0.301284	0.901214	2881	0.022826	0.017051	0.180775	0.716767	2579	0.033292	0.017051	0.050982	0.163782	2558	0.012722	0.018848	0.49976	0.970622
Rectal cancer	Phosphatidylcholines	4735	-0.00224	0.014883	0.880484	0.999758	2881	0.010758	0.018454	0.559959	0.995226	2579	0.034016	0.017621	0.053669	0.98792	2558	0.019938	0.019495	0.306529	0.983658
Colorectal cancer	Phosphatidylcholines	4735	0.031325	0.014197	0.027403	0.445308	2881	0.033508	0.017416	0.054454	0.181514	2579	0.031565	0.016956	0.06277	0.180465	2558	-0.00105	0.018476	0.95447	0.989619
Distal colon cancer	Phosphoglycerides	4753	-0.00233	0.014751	0.874421	0.998606	2924	-0.00493	0.01681	0.769224	0.989826	2601	0.017004	0.016785	0.311134	0.860196	2558	0.035188	0.018559	0.058073	0.563058
Colon cancer	Phosphoglycerides	4753	0.00742	0.014375	0.60574	0.985666	2924	0.003407	0.017405	0.844813	0.91634	2601	0.052859	0.017786	0.002987	0.072768	2558	0.019978	0.018413	0.278031	0.89786
Proximal colon cancer	Phosphoglycerides	4753	-0.0207	0.014642	0.157569	0.901214	2924	0.003908	0.016981	0.818005	0.931392	2601	0.01912	0.0167	0.252345	0.394826	2558	0.01599	0.017967	0.373563	0.970622
Rectal cancer	Phosphoglycerides	4753	-0.00276	0.014687	0.850994	0.999758	2924	0.003275	0.017832	0.854315	0.995226	2601	0.020471	0.017807	0.250425	0.98792	2558	0.02538	0.019146	0.185081	0.983658
Colorectal cancer	Phosphoglycerides	4753	0.023056	0.014202	0.104561	0.445308	2924	0.010581	0.017053	0.534996	0.63606	2601	0.027149	0.017023	0.110861	0.252456	2558	0.005618	0.018169	0.757201	0.989619
Proximal colon cancer	Phospholipids in chylomicrons and extremely large VLDL	4758	0.005953	0.014376	0.678847	0.901214	2927	-0.00905	0.018164	0.618314	0.880325	2611	0.028186	0.018978	0.13761	0.267216	2559	0.016241	0.019112	0.395509	0.970622
Colon cancer	Phospholipids in chylomicrons and extremely large VLDL	4758	-0.00034	0.014207	0.980953	0.997663	2927	-0.01824	0.018537	0.325237	0.655485	2611	0.025392	0.019101	0.183842	0.356659	2559	-0.00408	0.018591	0.826301	0.972717
Distal colon cancer	Phospholipids in chylomicrons and extremely large VLDL	4758	0.00119	0.01436	0.933963	0.998606	2927	-0.01142	0.018387	0.534508	0.989826	2611	0.029417	0.018893	0.119582	0.821788	2559	-0.00739	0.019896	0.710272	0.983584
Rectal cancer	Phospholipids in chylomicrons and extremely large VLDL	4758	-0.00198	0.014166	0.889079	0.999758	2927	-0.00118	0.018859	0.950024	0.995226	2611	0.002265	0.019809	0.908962	0.98792	2559	-0.00208	0.020259	0.918205	0.983658
Colorectal cancer	Phospholipids in chylomicrons and extremely large VLDL	4758	0.018334	0.0141	0.193562	0.445308	2927	0.028775	0.018386	0.117691	0.287968	2611	0.024446	0.019148	0.201822	0.362649	2559	-0.01437	0.01897	0.448835	0.989619
Proximal colon cancer	Phospholipids in IDL	4758	0.006695	0.014718	0.649214	0.901214	2927	0.020161	0.017402	0.24673	0.716767	2611	0.041556	0.01808	0.021614	0.1221	2559	0.019853	0.019792	0.315912	0.970622
Colon cancer	Phospholipids in IDL	4758	0.012828	0.014194	0.36615	0.892672	2927	0.021296	0.017725	0.229658	0.655485	2611	0.045488	0.018627	0.014668	0.074972	2559	0.008025	0.019907	0.686894	0.972717
Distal colon cancer	Phospholipids in IDL	4758	-0.00459	0.014403	0.750027	0.998606	2927	0.005861	0.017391	0.736141	0.989826	2611	-0.00075	0.018128	0.967085	0.987198	2559	-0.00177	0.019907	0.929029	0.983584
Rectal cancer	Phospholipids in IDL	4758	-9.1e-05	0.014508	0.99499	0.999758	2927	0.01825	0.017589	0.299555	0.995226	2611	0.002073	0.018566	0.91109	0.98792	2559	0.006893	0.020496	0.736659	0.983658
Colorectal cancer	Phospholipids in IDL	4758	0.016789	0.013969	0.229491	0.46819	2927	0.039354	0.017588	0.025323	0.114203	2611	0.05269	0.018328	0.004074	0.021396	2559	0.010966	0.019319	0.570334	0.989619
Distal colon cancer	Phospholipids in large HDL	4758	0.003768	0.014242	0.791374	0.998606	2927	-0.00085	0.017258	0.960562	0.989826	2611	-0.01347	0.01679	0.422514	0.87548	2559	0.040383	0.017335	0.019907	0.341475
Colon cancer	Phospholipids in large HDL	4758	0.01891	0.014359	0.187905	0.892672	2927	0.019456	0.017979	0.279264	0.655485	2611	0.017479	0.017757	0.325044	0.473165	2559	0.038924	0.01734	0.024868	0.524453
Proximal colon cancer	Phospholipids in large HDL	4758	-0.01924	0.014196	0.17534	0.901214	2927	0.008018	0.017493	0.64675	0.880325	2611	-0.01522	0.016578	0.358785	0.494135	2559	0.003828	0.016635	0.818009	0.974427
Rectal cancer	Phospholipids in large HDL	4758	0.00179	0.014463	0.901525	0.999758	2927	-0.00198	0.018382	0.914309	0.995226	2611	0.005326	0.017264	0.75774	0.98792	2559	0.026998	0.017669	0.126628	0.983658
Colorectal cancer	Phospholipids in large HDL	4758	0.006178	0.014084	0.660939	0.815292	2927	-0.01145	0.017454	0.511765	0.63606	2611	-0.01063	0.0163	0.514351	0.62593	2559	-0.00274	0.016865	0.871123	0.989619
Proximal colon cancer	Phospholipids in large LDL	4758	0.012086	0.014754	0.412731	0.901214	2927	0.022176	0.017267	0.199142	0.716767	2611	0.046171	0.018111	0.01085	0.118838	2559	0.016607	0.020032	0.407186	0.970622
Colon cancer	Phospholipids in large LDL	4758	0.014216	0.014209	0.317153	0.892672	2927	0.017647	0.017633	0.317008	0.655485	2611	0.046516	0.018552	0.012227	0.074602	2559	0.005099	0.019969	0.798492	0.972717
Distal colon cancer	Phospholipids in large LDL	4758	0.000774	0.014331	0.95694	0.998606	2927	0.005752	0.017357	0.740372	0.989826	2611	0.004599	0.017956	0.79787	0.987198	2559	0.001266	0.019888	0.949241	0.983584
Rectal cancer	Phospholipids in large LDL	4758	0.00258	0.014455	0.858345	0.999758	2927	0.019386	0.01772	0.274038	0.995226	2611	0.003655	0.018639	0.844557	0.98792	2559	0.008422	0.020448	0.680453	0.983658
Colorectal cancer	Phospholipids in large LDL	4758	0.020755	0.013948	0.136814	0.445308	2927	0.040275	0.017628	0.0224	0.107335	2611	0.055276	0.018345	0.002611	0.021396	2559	0.013259	0.019435	0.495168	0.989619
Colon cancer	Phospholipids in large VLDL	4758	-0.00114	0.014251	0.936318	0.997663	2927	-0.02417	0.018826	0.199232	0.655485	2611	0.020981	0.019154	0.273456	0.439824	2559	-0.02284	0.019589	0.243729	0.862722
Proximal colon cancer	Phospholipids in large VLDL	4758	0.003835	0.014373	0.789611	0.901214	2927	-0.01172	0.018416	0.524553	0.867347	2611	0.029298	0.018968	0.12256	0.263622	2559	0.008766	0.019557	0.654012	0.970622
Distal colon cancer	Phospholipids in large VLDL	4758	0.007432	0.014099	0.598141	0.998606	2927	-0.01311	0.01844	0.477037	0.989826	2611	0.029163	0.018638	0.117775	0.821788	2559	-0.00752	0.020192	0.709548	0.983584
Rectal cancer	Phospholipids in large VLDL	4758	9.39e-05	0.01408	0.994678	0.999758	2927	0.002472	0.018915	0.896009	0.995226	2611	0.009073	0.019848	0.647632	0.98792	2559	-0.01431	0.020108	0.476625	0.983658
Colorectal cancer	Phospholipids in large VLDL	4758	0.022012	0.014093	0.118368	0.445308	2927	0.021624	0.018503	0.242619	0.401455	2611	0.024129	0.018701	0.197071	0.359791	2559	-0.01876	0.019376	0.333033	0.989619
Distal colon cancer	Phospholipids in medium HDL	4758	0.021677	0.014283	0.12916	0.998606	2927	0.002	0.017401	0.908511	0.989826	2611	-0.00514	0.016946	0.761779	0.987198	2559	0.047017	0.01819	0.0098	0.312786
Colon cancer	Phospholipids in medium HDL	4758	0.031266	0.014686	0.033312	0.733164	2927	0.003451	0.018195	0.849569	0.91634	2611	0.01777	0.017517	0.310454	0.466695	2559	0.01616	0.018141	0.373135	0.89786
Proximal colon cancer	Phospholipids in medium HDL	4758	0.008068	0.014816	0.586081	0.901214	2927	0.019549	0.017652	0.268181	0.716767	2611	0.007485	0.017028	0.660278	0.759001	2559	0.011574	0.017876	0.517394	0.970622
Rectal cancer	Phospholipids in medium HDL	4758	0.017818	0.01438	0.215392	0.999758	2927	-0.00685	0.01816	0.70594	0.995226	2611	0.00189	0.016871	0.910826	0.98792	2559	0.026431	0.018528	0.153849	0.983658
Colorectal cancer	Phospholipids in medium HDL	4758	0.019826	0.01421	0.163015	0.445308	2927	-0.01313	0.017348	0.449278	0.583808	2611	-0.00066	0.015833	0.966568	0.979342	2559	-0.00941	0.017689	0.594732	0.989619
Proximal colon cancer	Phospholipids in medium LDL	4758	0.01774	0.014745	0.229009	0.901214	2927	0.021075	0.017246	0.221818	0.716767	2611	0.049907	0.018107	0.005888	0.118838	2559	0.012298	0.020065	0.539991	0.970622
Distal colon cancer	Phospholipids in medium LDL	4758	0.007088	0.014137	0.616134	0.998606	2927	0.002657	0.017327	0.87816	0.989826	2611	0.009379	0.01773	0.59685	0.953302	2559	0.003708	0.019747	0.851052	0.983584
Rectal cancer	Phospholipids in medium LDL	4758	0.005334	0.014399	0.711062	0.999758	2927	0.016524	0.018086	0.360989	0.995226	2611	0.004583	0.018697	0.806401	0.98792	2559	0.009297	0.020155	0.644643	0.983658
Colon cancer	Phospholipids in medium LDL	4758	0.015461	0.014226	0.277167	0.892672	2927	0.00876	0.017538	0.617464	0.779442	2611	0.048199	0.018373	0.008757	0.074602	2559	-0.00086	0.01995	0.965514	0.988335
Colorectal cancer	Phospholipids in medium LDL	4758	0.025672	0.013979	0.06636	0.445308	2927	0.038528	0.017646	0.029089	0.123562	2611	0.05484	0.018267	0.002707	0.021396	2559	0.013619	0.019577	0.486713	0.989619
Colon cancer	Phospholipids in medium VLDL	4758	-4.2e-05	0.014271	0.997663	0.997663	2927	-0.02369	0.018809	0.208016	0.655485	2611	0.021809	0.019136	0.254518	0.424197	2559	-0.02773	0.019404	0.1531	0.793982
Proximal colon cancer	Phospholipids in medium VLDL	4758	0.005741	0.014358	0.689292	0.901214	2927	-0.00977	0.018554	0.59871	0.880325	2611	0.031748	0.019041	0.095558	0.244203	2559	0.011657	0.019277	0.545439	0.970622
Distal colon cancer	Phospholipids in medium VLDL	4758	0.009325	0.014027	0.506199	0.998606	2927	-0.01285	0.018448	0.486128	0.989826	2611	0.025172	0.018673	0.17776	0.821788	2559	-0.00653	0.019863	0.742191	0.983584
Rectal cancer	Phospholipids in medium VLDL	4758	0.00069	0.014053	0.960822	0.999758	2927	0.006417	0.018967	0.735133	0.995226	2611	0.009893	0.019799	0.617336	0.98792	2559	-0.01463	0.019951	0.463359	0.983658
Colorectal cancer	Phospholipids in medium VLDL	4758	0.023428	0.014073	0.096024	0.445308	2927	0.027401	0.018503	0.138739	0.310342	2611	0.030166	0.018644	0.105784	0.248268	2559	-0.01451	0.019267	0.451393	0.989619
Distal colon cancer	Phospholipids in small HDL	4758	0.01141	0.014476	0.430615	0.998606	2927	-0.00658	0.018729	0.725294	0.989826	2611	0.005137	0.01862	0.782663	0.987198	2559	0.03241	0.019456	0.09588	0.756629
Proximal colon cancer	Phospholipids in small HDL	4758	0.022413	0.014757	0.128869	0.901214	2927	-0.00219	0.018636	0.906419	0.981265	2611	0.016957	0.018685	0.364202	0.49566	2559	0.009034	0.019525	0.643642	0.970622
Colon cancer	Phospholipids in small HDL	4758	0.007504	0.014533	0.605645	0.985666	2927	-0.02464	0.018804	0.190236	0.655485	2611	-0.0004	0.019077	0.983215	0.987508	2559	-0.00975	0.019404	0.615367	0.972717
Rectal cancer	Phospholipids in small HDL	4758	0.008424	0.01457	0.563154	0.999758	2927	-0.02351	0.018594	0.206222	0.995226	2611	-0.00342	0.018864	0.856097	0.98792	2559	0.01142	0.019482	0.55779	0.983658
Colorectal cancer	Phospholipids in small HDL	4758	0.003867	0.014417	0.788551	0.902321	2927	-0.0195	0.017743	0.27188	0.434258	2611	-0.00478	0.017869	0.789239	0.872716	2559	-0.02185	0.019111	0.253072	0.989619
Proximal colon cancer	Phospholipids in small LDL	4758	0.01657	0.014748	0.261278	0.901214	2927	0.020339	0.017377	0.241914	0.716767	2611	0.046715	0.018162	0.010164	0.118838	2559	0.009988	0.019843	0.614754	0.970622
Distal colon cancer	Phospholipids in small LDL	4758	0.004934	0.014267	0.729499	0.998606	2927	-0.00209	0.017316	0.903969	0.989826	2611	0.008034	0.017756	0.650967	0.987198	2559	0.009963	0.019575	0.610812	0.983584
Rectal cancer	Phospholipids in small LDL	4758	0.000892	0.014484	0.950906	0.999758	2927	0.01314	0.018101	0.467929	0.995226	2611	0.004498	0.018751	0.810453	0.98792	2559	0.010363	0.01985	0.601692	0.983658
Colon cancer	Phospholipids in small LDL	4758	0.013401	0.014258	0.347294	0.892672	2927	0.004704	0.017664	0.790009	0.895084	2611	0.049869	0.018466	0.006967	0.074602	2559	0.000568	0.019918	0.97727	0.988335
Colorectal cancer	Phospholipids in small LDL	4758	0.024712	0.013981	0.07719	0.445308	2927	0.040293	0.017845	0.024022	0.110502	2611	0.053283	0.018418	0.003848	0.021396	2559	0.011815	0.019649	0.547688	0.989619
Colon cancer	Phospholipids in small VLDL	4758	-0.00189	0.014451	0.895763	0.997663	2927	-0.02463	0.018421	0.181357	0.655485	2611	0.028964	0.019176	0.131051	0.294775	2559	-0.02226	0.019531	0.254405	0.886442
Proximal colon cancer	Phospholipids in small VLDL	4758	0.013147	0.014499	0.364591	0.901214	2927	0.000701	0.018503	0.969784	0.989276	2611	0.045268	0.019028	0.017429	0.1221	2559	0.01715	0.019682	0.383657	0.970622
Distal colon cancer	Phospholipids in small VLDL	4758	0.00653	0.013988	0.640613	0.998606	2927	-0.01057	0.018429	0.566232	0.989826	2611	0.017203	0.018381	0.349411	0.860196	2559	0.002977	0.019904	0.881101	0.983584
Rectal cancer	Phospholipids in small VLDL	4758	-0.00111	0.014072	0.936957	0.999758	2927	0.008046	0.018861	0.669726	0.995226	2611	0.007902	0.019542	0.685975	0.98792	2559	0.002642	0.019826	0.89401	0.983658
Colorectal cancer	Phospholipids in small VLDL	4758	0.019436	0.014019	0.16568	0.445308	2927	0.024666	0.018372	0.179519	0.332978	2611	0.034937	0.018556	0.059839	0.175445	2559	-0.00383	0.019153	0.841706	0.989619
Colon cancer	Phospholipids in very large HDL	4758	0.011128	0.014255	0.435059	0.901474	2927	0.024592	0.017939	0.17051	0.655485	2611	0.02487	0.018245	0.172962	0.348959	2559	0.040059	0.017908	0.025372	0.524453
Distal colon cancer	Phospholipids in very large HDL	4758	-0.00556	0.014343	0.698184	0.998606	2927	-0.00371	0.017258	0.829745	0.989826	2611	-0.01171	0.01733	0.499355	0.897279	2559	0.026906	0.017607	0.1266	0.777602
Rectal cancer	Phospholipids in very large HDL	4758	-0.00348	0.0144	0.809141	0.999758	2927	0.000437	0.018338	0.980976	0.995226	2611	0.006134	0.017775	0.730067	0.98792	2559	0.022851	0.01773	0.197564	0.983658
Colorectal cancer	Phospholipids in very large HDL	4758	0.002564	0.014065	0.855378	0.923648	2927	-0.00615	0.017577	0.72662	0.807355	2611	-0.0145	0.017219	0.399655	0.522277	2559	0.000137	0.017894	0.993909	0.995514
Proximal colon cancer	Phospholipids in very large HDL	4758	-0.02615	0.014123	0.064158	0.901214	2927	0.001876	0.017595	0.915111	0.981265	2611	-0.01728	0.016832	0.304666	0.44514	2559	0.001934	0.017012	0.909473	0.993758
Proximal colon cancer	Phospholipids in very large VLDL	4758	0.003528	0.014427	0.80685	0.901214	2927	-0.00779	0.018135	0.667424	0.897704	2611	0.027304	0.01895	0.149744	0.270099	2559	0.009184	0.019791	0.642645	0.970622
Colon cancer	Phospholipids in very large VLDL	4758	-0.00039	0.01421	0.977992	0.997663	2927	-0.01876	0.018628	0.313927	0.655485	2611	0.022962	0.019108	0.229582	0.394059	2559	-0.0065	0.019274	0.735995	0.972717
Distal colon cancer	Phospholipids in very large VLDL	4758	0.003126	0.01425	0.826364	0.998606	2927	-0.01162	0.018426	0.528363	0.989826	2611	0.030255	0.01883	0.108234	0.821788	2559	-0.01161	0.020112	0.563817	0.983584
Rectal cancer	Phospholipids in very large VLDL	4758	-0.00082	0.014123	0.953587	0.999758	2927	0.000558	0.018831	0.976349	0.995226	2611	0.003769	0.0199	0.849791	0.98792	2559	-0.0039	0.020295	0.847653	0.983658
Colorectal cancer	Phospholipids in very large VLDL	4758	0.019766	0.014099	0.16099	0.445308	2927	0.026483	0.018453	0.151344	0.310342	2611	0.022605	0.019042	0.235305	0.380822	2559	-0.02364	0.019491	0.225312	0.989619
Proximal colon cancer	Phospholipids in very small VLDL	4758	0.009064	0.014741	0.538656	0.901214	2927	0.02144	0.017386	0.217607	0.716767	2611	0.045131	0.018405	0.014265	0.1221	2559	0.024387	0.019907	0.220686	0.970622
Colon cancer	Phospholipids in very small VLDL	4758	0.014107	0.01418	0.319866	0.892672	2927	0.014752	0.0176	0.402003	0.665185	2611	0.047582	0.018868	0.011734	0.074602	2559	0.003712	0.019886	0.851953	0.972717
Distal colon cancer	Phospholipids in very small VLDL	4758	0.003273	0.014007	0.815225	0.998606	2927	0.004102	0.017523	0.814921	0.989826	2611	0.002837	0.018199	0.876145	0.987198	2559	-0.00308	0.019922	0.877169	0.983584
Rectal cancer	Phospholipids in very small VLDL	4758	0.001632	0.014384	0.909681	0.999758	2927	0.022925	0.017932	0.201198	0.995226	2611	0.007015	0.018782	0.708803	0.98792	2559	0.006521	0.020641	0.752068	0.983658
Colorectal cancer	Phospholipids in very small VLDL	4758	0.025121	0.013981	0.07242	0.445308	2927	0.044519	0.017541	0.011201	0.085876	2611	0.059146	0.018571	0.001465	0.021396	2559	0.005429	0.019429	0.779932	0.989619
Proximal colon cancer	Phospholipids to total lipids ratio in chylomicrons and extremely large VLDL	4758	0.003777	0.014279	0.791401	0.901214	2927	-0.00534	0.018145	0.768593	0.917029	2611	0.016645	0.01879	0.375779	0.505434	2559	0.016505	0.018869	0.381798	0.970622
Colon cancer	Phospholipids to total lipids ratio in chylomicrons and extremely large VLDL	4758	0.000691	0.014247	0.961297	0.997663	2927	-0.00723	0.018244	0.691932	0.833217	2611	0.01475	0.018802	0.432832	0.553063	2559	0.007812	0.018753	0.677043	0.972717
Distal colon cancer	Phospholipids to total lipids ratio in chylomicrons and extremely large VLDL	4758	-0.0186	0.014533	0.200558	0.998606	2927	-0.01503	0.017737	0.396876	0.989826	2611	0.002129	0.018936	0.910487	0.987198	2559	-0.01713	0.019684	0.384351	0.983584
Rectal cancer	Phospholipids to total lipids ratio in chylomicrons and extremely large VLDL	4758	-0.02645	0.014232	0.063162	0.999758	2927	-0.01986	0.018258	0.276681	0.995226	2611	-0.00485	0.019385	0.802482	0.98792	2559	0.009188	0.019336	0.634713	0.983658
Colorectal cancer	Phospholipids to total lipids ratio in chylomicrons and extremely large VLDL	4758	-0.02099	0.013964	0.132828	0.445308	2927	-0.00347	0.018126	0.848188	0.902373	2611	0.010118	0.018302	0.580417	0.693261	2559	-0.01157	0.019311	0.549022	0.989619
Colon cancer	Phospholipids to total lipids ratio in IDL	4758	-0.0006	0.014475	0.966679	0.997663	2927	0.00028	0.019035	0.988277	0.988277	2611	-0.01276	0.018778	0.496743	0.614252	2559	0.021119	0.020086	0.293159	0.89786
Distal colon cancer	Phospholipids to total lipids ratio in IDL	4758	-0.01229	0.014368	0.39223	0.998606	2927	-0.00163	0.018818	0.931164	0.989826	2611	-0.00044	0.018426	0.980811	0.993002	2559	0.012988	0.020094	0.51809	0.983584
Rectal cancer	Phospholipids to total lipids ratio in IDL	4758	0.003703	0.014324	0.796031	0.999758	2927	-0.01541	0.018689	0.409741	0.995226	2611	0.000793	0.018914	0.966548	0.98792	2559	-0.00325	0.020612	0.874723	0.983658
Colorectal cancer	Phospholipids to total lipids ratio in IDL	4758	-0.01305	0.014312	0.361986	0.570912	2927	-0.0589	0.018092	0.001143	0.032982	2611	-0.03902	0.017891	0.029288	0.101356	2559	-0.0053	0.019756	0.788498	0.989619
Proximal colon cancer	Phospholipids to total lipids ratio in IDL	4758	-0.01305	0.01476	0.376796	0.901214	2927	-0.01609	0.01846	0.383458	0.817562	2611	-0.01378	0.018491	0.456333	0.585459	2559	0.00183	0.020009	0.927141	0.993758
Colon cancer	Phospholipids to total lipids ratio in large HDL	4758	0.002596	0.014355	0.856494	0.997663	2927	-0.01385	0.018452	0.452847	0.680072	2611	0.01956	0.01953	0.316668	0.472945	2559	-0.0361	0.018702	0.05369	0.648086
Proximal colon cancer	Phospholipids to total lipids ratio in large HDL	4758	0.025835	0.0145	0.07485	0.901214	2927	0.012972	0.017943	0.469765	0.850398	2611	0.060988	0.018378	0.000917	0.118838	2559	0.011671	0.018578	0.529931	0.970622
Distal colon cancer	Phospholipids to total lipids ratio in large HDL	4758	-0.00091	0.014504	0.949704	0.998606	2927	0.006566	0.018287	0.719569	0.989826	2611	0.021743	0.018931	0.250864	0.853394	2559	-0.01334	0.01809	0.460803	0.983584
Rectal cancer	Phospholipids to total lipids ratio in large HDL	4758	0.006695	0.014339	0.640562	0.999758	2927	0.002301	0.018393	0.900464	0.995226	2611	0.002282	0.019553	0.907083	0.98792	2559	-0.02017	0.018784	0.283096	0.983658
Colorectal cancer	Phospholipids to total lipids ratio in large HDL	4758	0.004652	0.014257	0.744233	0.868901	2927	0.010723	0.01768	0.544246	0.63606	2611	0.04722	0.018872	0.012406	0.048362	2559	-0.00351	0.018573	0.849994	0.989619
Proximal colon cancer	Phospholipids to total lipids ratio in large LDL	4758	0.001844	0.014701	0.900186	0.936846	2927	-0.0207	0.017353	0.233043	0.716767	2611	-0.03807	0.017804	0.032566	0.13508	2559	-0.01102	0.020212	0.585561	0.970622
Colon cancer	Phospholipids to total lipids ratio in large LDL	4758	-0.00819	0.014113	0.561635	0.984613	2927	-0.01781	0.017773	0.316318	0.655485	2611	-0.05023	0.018233	0.005913	0.074602	2559	-0.00385	0.020071	0.847709	0.972717
Distal colon cancer	Phospholipids to total lipids ratio in large LDL	4758	0.008324	0.01436	0.56217	0.998606	2927	-0.0048	0.017096	0.778814	0.989826	2611	0.000667	0.017762	0.970029	0.987198	2559	0.003028	0.019862	0.878835	0.983584
Rectal cancer	Phospholipids to total lipids ratio in large LDL	4758	0.004226	0.014558	0.771594	0.999758	2927	-0.01815	0.017705	0.305332	0.995226	2611	-0.00415	0.018049	0.818224	0.98792	2559	-0.00717	0.020169	0.722382	0.983658
Colorectal cancer	Phospholipids to total lipids ratio in large LDL	4758	-0.01435	0.014023	0.30618	0.517804	2927	-0.03443	0.017372	0.047564	0.165752	2611	-0.04856	0.018201	0.007671	0.032081	2559	-0.01906	0.019635	0.33182	0.989619
Colon cancer	Phospholipids to total lipids ratio in large VLDL	4758	0.000832	0.013993	0.952609	0.997663	2927	-0.01831	0.018212	0.314865	0.655485	2611	0.031387	0.01912	0.100786	0.249255	2559	0.025221	0.019745	0.201592	0.807401
Proximal colon cancer	Phospholipids to total lipids ratio in large VLDL	4758	0.00194	0.014546	0.893901	0.934533	2927	-0.0052	0.017689	0.76877	0.917029	2611	0.036409	0.018796	0.05284	0.163782	2559	0.016556	0.019368	0.392731	0.970622
Distal colon cancer	Phospholipids to total lipids ratio in large VLDL	4758	-0.0053	0.014287	0.710643	0.998606	2927	-0.01605	0.017763	0.366245	0.989826	2611	0.017583	0.018304	0.336837	0.860196	2559	-0.01046	0.020014	0.601176	0.983584
Rectal cancer	Phospholipids to total lipids ratio in large VLDL	4758	0.000857	0.014332	0.952338	0.999758	2927	0.005319	0.018472	0.773401	0.995226	2611	0.013343	0.019583	0.495722	0.98792	2559	0.00165	0.019672	0.933162	0.983658
Colorectal cancer	Phospholipids to total lipids ratio in large VLDL	4758	0.015623	0.01391	0.261431	0.476377	2927	0.018908	0.018045	0.294818	0.449061	2611	0.033301	0.018439	0.071042	0.194519	2559	-0.01767	0.019582	0.366863	0.989619
Colon cancer	Phospholipids to total lipids ratio in medium HDL	4758	0.006343	0.014307	0.657544	0.997663	2927	0.005431	0.0187	0.771514	0.882827	2611	0.044739	0.017492	0.010593	0.074602	2559	0.007593	0.018988	0.689286	0.972717
Distal colon cancer	Phospholipids to total lipids ratio in medium HDL	4758	0.0006	0.014189	0.966288	0.998606	2927	0.006976	0.018179	0.701214	0.989826	2611	-0.00743	0.017358	0.66854	0.987198	2559	-0.00893	0.018631	0.631647	0.983584
Rectal cancer	Phospholipids to total lipids ratio in medium HDL	4758	0.015676	0.014217	0.270241	0.999758	2927	0.013118	0.018299	0.473523	0.995226	2611	0.004526	0.017744	0.798671	0.98792	2559	0.022695	0.019287	0.239413	0.983658
Colorectal cancer	Phospholipids to total lipids ratio in medium HDL	4758	0.009486	0.014141	0.502357	0.683681	2927	-0.01887	0.017795	0.289069	0.444908	2611	0.003746	0.01732	0.828791	0.907723	2559	0.012973	0.018891	0.492321	0.989619
Proximal colon cancer	Phospholipids to total lipids ratio in medium HDL	4758	-0.00285	0.014919	0.848456	0.901214	2927	0.028687	0.018041	0.111928	0.716767	2611	0.028538	0.01785	0.109996	0.255223	2559	0.002265	0.018637	0.903275	0.993758
Proximal colon cancer	Phospholipids to total lipids ratio in medium LDL	4758	0.00033	0.014805	0.98224	0.986529	2927	-0.01848	0.017454	0.289823	0.716767	2611	-0.04066	0.018163	0.025257	0.1221	2559	-0.0111	0.020099	0.580782	0.970622
Colon cancer	Phospholipids to total lipids ratio in medium LDL	4758	-0.0078	0.014322	0.585971	0.985666	2927	-0.019	0.017992	0.291078	0.655485	2611	-0.0441	0.018654	0.018152	0.086979	2559	-0.00657	0.019948	0.741876	0.972717
Distal colon cancer	Phospholipids to total lipids ratio in medium LDL	4758	0.009756	0.014559	0.502839	0.998606	2927	-0.00911	0.017467	0.602192	0.989826	2611	0.002995	0.018068	0.868354	0.987198	2559	0.002511	0.019692	0.898528	0.983584
Rectal cancer	Phospholipids to total lipids ratio in medium LDL	4758	0.003884	0.014531	0.789241	0.999758	2927	-0.01913	0.017537	0.275491	0.995226	2611	-0.00461	0.018322	0.801192	0.98792	2559	-0.00169	0.019998	0.932588	0.983658
Colorectal cancer	Phospholipids to total lipids ratio in medium LDL	4758	-0.00841	0.01404	0.54906	0.725769	2927	-0.03387	0.017525	0.053388	0.180577	2611	-0.05256	0.018499	0.004526	0.023098	2559	-0.02176	0.01962	0.267589	0.989619
Colon cancer	Phospholipids to total lipids ratio in medium VLDL	4758	0.003674	0.014376	0.798275	0.997663	2927	0.013468	0.017723	0.447342	0.680072	2611	0.024567	0.017546	0.161578	0.337846	2559	0.03443	0.018411	0.061582	0.650998
Distal colon cancer	Phospholipids to total lipids ratio in medium VLDL	4758	-0.02155	0.014508	0.137561	0.998606	2927	0.002369	0.016649	0.886849	0.989826	2611	-0.01166	0.016884	0.490011	0.887421	2559	0.019489	0.018698	0.297369	0.928506
Proximal colon cancer	Phospholipids to total lipids ratio in medium VLDL	4758	-0.00817	0.014252	0.566634	0.901214	2927	0.013523	0.01734	0.435538	0.847846	2611	0.006536	0.016621	0.694191	0.778848	2559	0.006376	0.018056	0.724025	0.970622
Rectal cancer	Phospholipids to total lipids ratio in medium VLDL	4758	-0.01207	0.014535	0.406247	0.999758	2927	-0.00088	0.018142	0.961461	0.995226	2611	-0.00448	0.017316	0.795658	0.98792	2559	0.034308	0.0186	0.065225	0.983658
Colorectal cancer	Phospholipids to total lipids ratio in medium VLDL	4758	-0.01882	0.01409	0.18168	0.445308	2927	0.00231	0.017076	0.892411	0.92457	2611	0.020602	0.016752	0.218856	0.370647	2559	0.023661	0.018026	0.189452	0.989619
Colon cancer	Phospholipids to total lipids ratio in small HDL	4758	-0.02002	0.014007	0.153082	0.892672	2927	-0.01185	0.017317	0.493732	0.714204	2611	-0.03739	0.016479	0.023371	0.095987	2559	0.011884	0.020129	0.555	0.972717
Proximal colon cancer	Phospholipids to total lipids ratio in small HDL	4758	-0.00535	0.014355	0.709579	0.901214	2927	-0.0237	0.016468	0.150223	0.716767	2611	-0.03141	0.016101	0.051153	0.163782	2559	0.004696	0.019906	0.81351	0.974427
Distal colon cancer	Phospholipids to total lipids ratio in small HDL	4758	-0.01148	0.014335	0.423128	0.998606	2927	-0.01578	0.016643	0.343162	0.989826	2611	-0.00589	0.016179	0.715971	0.987198	2559	0.010384	0.019384	0.592212	0.983584
Rectal cancer	Phospholipids to total lipids ratio in small HDL	4758	-0.01308	0.014514	0.367423	0.999758	2927	-0.02226	0.017286	0.197858	0.995226	2611	-0.009	0.016588	0.587419	0.98792	2559	0.012566	0.020186	0.533679	0.983658
Colorectal cancer	Phospholipids to total lipids ratio in small HDL	4758	-0.01602	0.014019	0.253212	0.476377	2927	0.013456	0.016634	0.418623	0.557887	2611	-0.02742	0.016508	0.096852	0.234116	2559	-0.02022	0.01971	0.305106	0.989619
Proximal colon cancer	Phospholipids to total lipids ratio in small LDL	4758	-0.00579	0.014827	0.696111	0.901214	2927	-0.01795	0.017525	0.305859	0.725233	2611	-0.04777	0.018366	0.009356	0.118838	2559	-0.01437	0.020268	0.478378	0.970622
Colon cancer	Phospholipids to total lipids ratio in small LDL	4758	-0.00808	0.014362	0.573926	0.985666	2927	-0.01857	0.017907	0.299801	0.655485	2611	-0.04207	0.018732	0.024795	0.09666	2559	-0.00319	0.019935	0.872975	0.972717
Distal colon cancer	Phospholipids to total lipids ratio in small LDL	4758	0.007849	0.014512	0.588603	0.998606	2927	-0.01138	0.017525	0.516105	0.989826	2611	-0.0015	0.018201	0.934202	0.987198	2559	0.009621	0.019653	0.62449	0.983584
Rectal cancer	Phospholipids to total lipids ratio in small LDL	4758	0.001663	0.014494	0.908635	0.999758	2927	-0.02131	0.017605	0.226166	0.995226	2611	-0.00579	0.018564	0.755158	0.98792	2559	0.001866	0.020093	0.926007	0.983658
Colorectal cancer	Phospholipids to total lipids ratio in small LDL	4758	-0.00907	0.014028	0.518159	0.692887	2927	-0.03645	0.017699	0.039518	0.146464	2611	-0.05529	0.018743	0.003205	0.021396	2559	-0.02217	0.019782	0.262588	0.989619
Distal colon cancer	Phospholipids to total lipids ratio in small VLDL	4758	-0.00246	0.014266	0.862902	0.998606	2927	0.00086	0.018707	0.963325	0.989826	2611	-0.02258	0.018719	0.227864	0.84041	2559	0.029191	0.018819	0.120993	0.777602
Colon cancer	Phospholipids to total lipids ratio in small VLDL	4758	0.000775	0.014291	0.956726	0.997663	2927	-0.00285	0.019318	0.882585	0.939789	2611	-0.02341	0.018916	0.21597	0.379695	2559	0.019258	0.019087	0.313088	0.89786
Proximal colon cancer	Phospholipids to total lipids ratio in small VLDL	4758	-0.00624	0.014671	0.670472	0.901214	2927	0.002053	0.018971	0.913813	0.981265	2611	-0.02282	0.018648	0.221249	0.360902	2559	-0.00738	0.019018	0.697818	0.970622
Rectal cancer	Phospholipids to total lipids ratio in small VLDL	4758	0.001697	0.014187	0.904778	0.999758	2927	-0.01221	0.01923	0.525548	0.995226	2611	-0.01197	0.01952	0.5398	0.98792	2559	0.026169	0.019535	0.180488	0.983658
Colorectal cancer	Phospholipids to total lipids ratio in small VLDL	4758	-0.01605	0.014133	0.256093	0.476377	2927	-0.05844	0.018379	0.001489	0.034682	2611	-0.04326	0.018245	0.017808	0.066063	2559	0.007708	0.018832	0.682326	0.989619
Distal colon cancer	Phospholipids to total lipids ratio in very large HDL	4758	6.43e-05	0.014367	0.996428	0.998606	2927	0.002941	0.017464	0.866276	0.989826	2611	-0.00665	0.016973	0.695215	0.987198	2559	0.026813	0.019539	0.17011	0.777602
Colon cancer	Phospholipids to total lipids ratio in very large HDL	4758	0.015213	0.014377	0.290053	0.892672	2927	0.022228	0.017137	0.194718	0.655485	2611	0.003819	0.017345	0.825742	0.879262	2559	0.01297	0.019557	0.507259	0.967992
Proximal colon cancer	Phospholipids to total lipids ratio in very large HDL	4758	-0.03256	0.014195	0.021866	0.901214	2927	-0.01046	0.017469	0.549248	0.870598	2611	-0.01977	0.01664	0.235022	0.378008	2559	0.003912	0.019249	0.838968	0.974427
Rectal cancer	Phospholipids to total lipids ratio in very large HDL	4758	0.009295	0.014471	0.52071	0.999758	2927	0.004277	0.017899	0.811147	0.995226	2611	0.0155	0.017387	0.372755	0.98792	2559	0.009911	0.01939	0.609271	0.983658
Colorectal cancer	Phospholipids to total lipids ratio in very large HDL	4758	-0.00028	0.01427	0.9846	0.990357	2927	-0.03173	0.017289	0.066587	0.206961	2611	-0.02229	0.016819	0.185184	0.349118	2559	-0.01505	0.019835	0.447927	0.989619
Distal colon cancer	Phospholipids to total lipids ratio in very large VLDL	4758	-0.00872	0.01456	0.549246	0.998606	2927	-0.01011	0.017672	0.567238	0.989826	2611	0.026081	0.018038	0.148329	0.821788	2559	-0.02242	0.019951	0.261133	0.895889
Colon cancer	Phospholipids to total lipids ratio in very large VLDL	4758	0.006054	0.014115	0.668017	0.997663	2927	-0.00426	0.01805	0.813391	0.911419	2611	0.038097	0.018574	0.040355	0.136495	2559	0.01231	0.019683	0.531751	0.967992
Proximal colon cancer	Phospholipids to total lipids ratio in very large VLDL	4758	0.004837	0.014485	0.738412	0.901214	2927	0.005767	0.017108	0.736072	0.917029	2611	0.029724	0.018642	0.110967	0.255223	2559	0.016128	0.019656	0.411986	0.970622
Rectal cancer	Phospholipids to total lipids ratio in very large VLDL	4758	0.001065	0.014374	0.940964	0.999758	2927	0.000391	0.018158	0.982803	0.995226	2611	0.007857	0.019335	0.684503	0.98792	2559	0.00199	0.019789	0.919896	0.983658
Colorectal cancer	Phospholipids to total lipids ratio in very large VLDL	4758	0.016036	0.013989	0.25169	0.476377	2927	0.030291	0.017876	0.090272	0.246366	2611	0.038591	0.018597	0.038069	0.121583	2559	-0.01924	0.019845	0.332346	0.989619
Colon cancer	Phospholipids to total lipids ratio in very small VLDL	4758	0.014586	0.014242	0.305795	0.892672	2927	0.018531	0.017119	0.279124	0.655485	2611	0.03985	0.017292	0.021268	0.094876	2559	0.03682	0.019197	0.055227	0.648086
Distal colon cancer	Phospholipids to total lipids ratio in very small VLDL	4758	-0.00027	0.014659	0.985333	0.998606	2927	0.002328	0.016792	0.88973	0.989826	2611	0.004554	0.016939	0.788071	0.987198	2559	0.031892	0.019013	0.093592	0.756629
Proximal colon cancer	Phospholipids to total lipids ratio in very small VLDL	4758	-0.00336	0.014677	0.819188	0.901214	2927	0.010784	0.016707	0.518676	0.867347	2611	0.02741	0.016747	0.101826	0.253515	2559	0.022438	0.018268	0.21946	0.970622
Rectal cancer	Phospholipids to total lipids ratio in very small VLDL	4758	0.004384	0.014679	0.765221	0.999758	2927	0.012485	0.017187	0.46761	0.995226	2611	0.007051	0.017274	0.683183	0.98792	2559	0.013298	0.018932	0.48249	0.983658
Colorectal cancer	Phospholipids to total lipids ratio in very small VLDL	4758	0.016938	0.013977	0.225631	0.467524	2927	0.014268	0.017065	0.403168	0.54869	2611	0.03159	0.016806	0.060262	0.175445	2559	0.006414	0.018516	0.729073	0.989619
Distal colon cancer	Polyunsaturated fatty acids	4755	0.000932	0.014248	0.947855	0.998606	2919	-0.00451	0.017094	0.791844	0.989826	2601	0.022015	0.01727	0.202523	0.821788	2558	0.02437	0.019655	0.215138	0.856709
Colon cancer	Polyunsaturated fatty acids	4755	0.0118	0.014245	0.407524	0.892672	2919	0.016042	0.0171	0.348232	0.655485	2601	0.047523	0.018334	0.009595	0.074602	2558	0.017466	0.019482	0.370083	0.89786
Proximal colon cancer	Polyunsaturated fatty acids	4755	-0.00717	0.014713	0.626089	0.901214	2919	0.006886	0.016853	0.682888	0.907886	2601	0.023845	0.017688	0.17774	0.302291	2558	0.021041	0.019456	0.279579	0.970622
Rectal cancer	Polyunsaturated fatty acids	4755	-0.00165	0.014353	0.90825	0.999758	2919	0.00929	0.017978	0.605384	0.995226	2601	0.027365	0.018409	0.137268	0.98792	2558	0.020171	0.020091	0.315482	0.983658
Colorectal cancer	Polyunsaturated fatty acids	4755	0.025919	0.014014	0.064453	0.445308	2919	0.036166	0.017612	0.040118	0.146464	2601	0.040073	0.017966	0.025801	0.092722	2558	0.011308	0.019043	0.552716	0.989619
Distal colon cancer	Ratio of apolipoprotein B to apolipoprotein A1	4758	0.000572	0.013875	0.967095	0.998606	2927	-0.00211	0.018763	0.910503	0.989826	2611	0.015718	0.018858	0.404655	0.87548	2559	-0.02635	0.018974	0.165057	0.777602
Colon cancer	Ratio of apolipoprotein B to apolipoprotein A1	4758	-0.00533	0.014432	0.711727	0.997663	2927	-0.00774	0.018783	0.680365	0.8236	2611	0.026387	0.019477	0.175613	0.351225	2559	-0.02475	0.019075	0.194565	0.807401
Proximal colon cancer	Ratio of apolipoprotein B to apolipoprotein A1	4758	0.013882	0.014445	0.33661	0.901214	2927	0.004641	0.018626	0.803254	0.928384	2611	0.040388	0.019125	0.034803	0.13508	2559	0.012383	0.018976	0.514097	0.970622
Rectal cancer	Ratio of apolipoprotein B to apolipoprotein A1	4758	0.001154	0.014018	0.934391	0.999758	2927	0.02009	0.019261	0.297011	0.995226	2611	0.005801	0.019665	0.768014	0.98792	2559	-0.0176	0.019273	0.361258	0.983658
Colorectal cancer	Ratio of apolipoprotein B to apolipoprotein A1	4758	0.014932	0.014092	0.289349	0.504168	2927	0.047125	0.018523	0.011006	0.085876	2611	0.051456	0.018719	0.006021	0.026632	2559	0.003259	0.018849	0.862724	0.989619
Colorectal cancer	Ratio of conjugated linoeic acid to total fatty acids	4753	0.006369	0.014607	0.662868	0.815292	2921	0.019482	0.018114	0.282221	0.444908	2601	-0.00192	0.019122	0.920182	0.957656
Proximal colon cancer	Ratio of conjugated linoeic acid to total fatty acids	4753	-0.01368	0.014802	0.35529	0.901214	2921	0.035829	0.019098	0.06075	0.716767	2601	-0.01452	0.018704	0.437631	0.568672
Colon cancer	Ratio of conjugated linoeic acid to total fatty acids	4753	-0.01282	0.014629	0.380777	0.892672	2921	0.01503	0.018152	0.407733	0.66562	2601	0.006822	0.020336	0.737284	0.811365
Distal colon cancer	Ratio of conjugated linoeic acid to total fatty acids	4753	0.013476	0.014842	0.363946	0.998606	2921	0.05383	0.017718	0.002401	0.407843	2601	0.020218	0.018901	0.284885	0.860196
Rectal cancer	Ratio of conjugated linoeic acid to total fatty acids	4753	0.009195	0.014637	0.529903	0.999758	2921	0.043873	0.018951	0.020678	0.995226	2601	0.026355	0.019941	0.1864	0.98792
Colorectal cancer	Ratio of diacylglycerol to triglycerides	4665	-0.00154	0.014389	0.914691	0.96692	2822	0.015635	0.018608	0.400857	0.54869	2544	0.048616	0.019062	0.010818	0.042898
Proximal colon cancer	Ratio of diacylglycerol to triglycerides	4665	0.024002	0.014656	0.101552	0.901214	2822	-0.00931	0.018708	0.618952	0.880325	2544	0.019184	0.019616	0.328187	0.464595
Colon cancer	Ratio of diacylglycerol to triglycerides	4665	0.007988	0.014477	0.581115	0.985666	2822	-0.02855	0.01885	0.129976	0.655485	2544	0.018781	0.019799	0.342934	0.478029
Distal colon cancer	Ratio of diacylglycerol to triglycerides	4665	8.68e-05	0.014067	0.995078	0.998606	2822	-0.01289	0.018982	0.497013	0.989826	2544	0.03211	0.01937	0.0975	0.821788
Rectal cancer	Ratio of diacylglycerol to triglycerides	4665	0.00284	0.0142	0.841494	0.999758	2822	-0.00379	0.019202	0.843479	0.995226	2544	0.024275	0.019634	0.216423	0.98792
Colon cancer	Ratio of docosahexaenoic acid to total fatty acids	4755	0.017378	0.014448	0.229112	0.892672	2922	0.013435	0.018175	0.459852	0.682361	2602	0.053151	0.019064	0.005342	0.074602	2558	0.033139	0.018722	0.076839	0.655464
Distal colon cancer	Ratio of docosahexaenoic acid to total fatty acids	4755	-0.01388	0.014527	0.339261	0.998606	2922	0.0131	0.018767	0.485227	0.989826	2602	0.011065	0.01901	0.560591	0.934318	2558	0.009143	0.01914	0.632926	0.983584
Rectal cancer	Ratio of docosahexaenoic acid to total fatty acids	4755	-0.00429	0.014144	0.761471	0.999758	2922	0.005933	0.018718	0.75128	0.995226	2602	0.034532	0.01901	0.069407	0.98792	2558	0.023779	0.0196	0.225173	0.983658
Colorectal cancer	Ratio of docosahexaenoic acid to total fatty acids	4755	0.003203	0.014354	0.823429	0.914492	2922	0.014584	0.018509	0.430803	0.566199	2602	0.040706	0.018732	0.029867	0.101356	2558	0.018243	0.019862	0.358437	0.989619
Proximal colon cancer	Ratio of docosahexaenoic acid to total fatty acids	4755	-0.01206	0.014511	0.406103	0.901214	2922	-0.01596	0.01814	0.379114	0.817562	2602	0.001028	0.018756	0.956274	0.968912	2558	-0.00099	0.018583	0.957515	0.993758
Proximal colon cancer	Ratio of linoleic acid to total fatty acids	4755	0.003966	0.014638	0.786457	0.901214	2918	0.028473	0.01901	0.13429	0.716767	2601	-0.02195	0.018741	0.241571	0.385842	2558	0.02112	0.019346	0.275067	0.970622
Colon cancer	Ratio of linoleic acid to total fatty acids	4755	-0.00865	0.01417	0.541802	0.97813	2918	0.006045	0.019166	0.752483	0.876759	2601	-0.06363	0.019728	0.001274	0.065053	2558	-0.00975	0.020182	0.628894	0.972717
Distal colon cancer	Ratio of linoleic acid to total fatty acids	4755	0.00538	0.014258	0.70595	0.998606	2918	0.018903	0.018696	0.312068	0.989826	2601	0.006273	0.018394	0.733116	0.987198	2558	0.005807	0.02007	0.772345	0.983584
Rectal cancer	Ratio of linoleic acid to total fatty acids	4755	-0.00702	0.013947	0.614589	0.999758	2918	0.013305	0.018706	0.477001	0.995226	2601	0.01504	0.01944	0.43919	0.98792	2558	0.005688	0.020153	0.777792	0.983658
Colorectal cancer	Ratio of linoleic acid to total fatty acids	4755	-0.03356	0.01422	0.018315	0.445308	2918	0.006339	0.018714	0.734831	0.808887	2601	-0.0395	0.018917	0.036894	0.119517	2558	-0.0101	0.019804	0.610123	0.989619
Colon cancer	Ratio of monounsaturated fatty acids to total fatty acids	4753	-0.01327	0.014505	0.360483	0.892672	2918	-0.03396	0.019228	0.077428	0.655485	2602	0.01354	0.019316	0.483383	0.604229	2558	-0.03629	0.020098	0.07111	0.655464
Proximal colon cancer	Ratio of monounsaturated fatty acids to total fatty acids	4753	0.010686	0.014786	0.469882	0.901214	2918	0.013328	0.019057	0.484357	0.850398	2602	0.030353	0.01923	0.114585	0.258817	2558	-0.01456	0.019375	0.45232	0.970622
Distal colon cancer	Ratio of monounsaturated fatty acids to total fatty acids	4753	0.00431	0.014072	0.759432	0.998606	2918	-0.00336	0.019025	0.859788	0.989826	2602	0.013938	0.018846	0.459634	0.887047	2558	0.009549	0.020268	0.637579	0.983584
Rectal cancer	Ratio of monounsaturated fatty acids to total fatty acids	4753	-0.00076	0.013913	0.956351	0.999758	2918	-0.00113	0.0186	0.951695	0.995226	2602	-0.01142	0.019542	0.559122	0.98792	2558	-0.00823	0.019823	0.678108	0.983658
Colorectal cancer	Ratio of monounsaturated fatty acids to total fatty acids	4753	0.006756	0.01435	0.637791	0.810453	2918	-0.01004	0.018685	0.590944	0.679586	2602	0.001168	0.018932	0.950793	0.979342	2558	-0.0381	0.019881	0.055402	0.989619
Colon cancer	Ratio of omega-3 fatty acids to total fatty acids	4755	0.014542	0.01463	0.320287	0.892672	2922	0.045022	0.017989	0.012378	0.655485	2602	0.044939	0.01971	0.022688	0.094876	2558	0.060475	0.019406	0.001852	0.413022
Distal colon cancer	Ratio of omega-3 fatty acids to total fatty acids	4755	-0.00505	0.014814	0.733157	0.998606	2922	0.021322	0.018738	0.25524	0.989826	2602	0.012251	0.019335	0.526381	0.91124	2558	0.017432	0.019151	0.362764	0.963053
Proximal colon cancer	Ratio of omega-3 fatty acids to total fatty acids	4755	-0.01831	0.014604	0.210003	0.901214	2922	0.00118	0.018073	0.94794	0.986544	2602	-0.01988	0.019111	0.298447	0.440018	2558	0.013701	0.01935	0.478972	0.970622
Rectal cancer	Ratio of omega-3 fatty acids to total fatty acids	4755	-0.00187	0.01464	0.898266	0.999758	2922	0.020357	0.019107	0.286765	0.995226	2602	0.005571	0.019142	0.771049	0.98792	2558	0.018659	0.019494	0.338567	0.983658
Colorectal cancer	Ratio of omega-3 fatty acids to total fatty acids	4755	0.015317	0.014603	0.294291	0.508925	2922	0.041619	0.018812	0.027021	0.11726	2602	0.066895	0.018977	0.000431	0.021396	2558	0.043896	0.02019	0.029786	0.989619
Colon cancer	Ratio of omega-6 fatty acids to total fatty acids	4755	0.010815	0.01428	0.448874	0.90908	2922	0.02721	0.019654	0.166336	0.655485	2602	-0.04101	0.019404	0.034669	0.122675	2558	0.013961	0.020095	0.487275	0.967608
Proximal colon cancer	Ratio of omega-6 fatty acids to total fatty acids	4755	0.003218	0.014786	0.827716	0.901214	2922	0.022421	0.019014	0.238441	0.716767	2602	-0.01747	0.018687	0.349881	0.484775	2558	0.018508	0.01947	0.341918	0.970622
Distal colon cancer	Ratio of omega-6 fatty acids to total fatty acids	4755	0.001841	0.014204	0.896904	0.998606	2922	0.017518	0.019255	0.363006	0.989826	2602	-0.00149	0.018594	0.936208	0.987198	2558	-0.00584	0.020233	0.7727	0.983584
Rectal cancer	Ratio of omega-6 fatty acids to total fatty acids	4755	-0.00394	0.013965	0.777917	0.999758	2922	0.01116	0.01891	0.555135	0.995226	2602	0.014465	0.01945	0.457128	0.98792	2558	-0.00311	0.02033	0.878282	0.983658
Colorectal cancer	Ratio of omega-6 fatty acids to total fatty acids	4755	-0.01393	0.01442	0.333914	0.544682	2922	0.02227	0.018985	0.240874	0.401455	2602	-0.02186	0.018804	0.24518	0.380822	2558	0.012287	0.019776	0.534443	0.989619
Colon cancer	Ratio of polyunsaturated fatty acids to total fatty acids	4755	0.013134	0.014285	0.357909	0.892672	2918	0.035341	0.019594	0.071393	0.655485	2601	-0.02615	0.019651	0.183429	0.356659	2558	0.028224	0.020148	0.161394	0.799798
Proximal colon cancer	Ratio of polyunsaturated fatty acids to total fatty acids	4755	0.000122	0.014711	0.993382	0.993382	2918	0.023746	0.018992	0.211304	0.716767	2601	-0.02187	0.018968	0.249124	0.394826	2558	0.020624	0.019529	0.291049	0.970622
Rectal cancer	Ratio of polyunsaturated fatty acids to total fatty acids	4755	-0.00417	0.014017	0.765892	0.999758	2918	0.014658	0.018977	0.439945	0.995226	2601	0.016452	0.019551	0.400142	0.98792	2558	0.0016	0.020462	0.937663	0.983658
Colorectal cancer	Ratio of polyunsaturated fatty acids to total fatty acids	4755	-0.01164	0.014409	0.419304	0.615453	2918	0.031152	0.018898	0.099371	0.262378	2601	-0.00552	0.018799	0.76903	0.858626	2558	0.022349	0.02011	0.266516	0.989619
Distal colon cancer	Ratio of polyunsaturated fatty acids to total fatty acids	4755	0.000135	0.014225	0.992444	0.998606	2918	0.020649	0.019276	0.284155	0.989826	2601	0.003748	0.018994	0.843592	0.987198	2558	9.35e-05	0.020199	0.996308	0.996308
Colon cancer	Ratio of saturated fatty acids to total fatty acids	4753	0.002329	0.014465	0.87207	0.997663	2917	0.000535	0.018521	0.976944	0.984556	2601	0.016701	0.019134	0.38283	0.511924	2558	0.017804	0.020165	0.37737	0.89786
Proximal colon cancer	Ratio of saturated fatty acids to total fatty acids	4753	-0.01259	0.014946	0.399585	0.901214	2917	-0.04578	0.018262	0.012232	0.716767	2601	-0.01849	0.018945	0.329256	0.464595	2558	-0.0064	0.019438	0.741916	0.970622
Distal colon cancer	Ratio of saturated fatty acids to total fatty acids	4753	-0.00265	0.014412	0.854049	0.998606	2917	-0.02049	0.018461	0.267192	0.989826	2601	-0.01736	0.018064	0.336685	0.860196	2558	-0.01518	0.019339	0.432425	0.983584
Rectal cancer	Ratio of saturated fatty acids to total fatty acids	4753	0.007454	0.014317	0.602626	0.999758	2917	-0.01716	0.018589	0.356107	0.995226	2601	-0.00321	0.018763	0.864001	0.98792	2558	0.00636	0.019217	0.740697	0.983658
Colorectal cancer	Ratio of saturated fatty acids to total fatty acids	4753	0.010852	0.014694	0.460216	0.63383	2917	-0.02184	0.017444	0.210734	0.367189	2601	0.009764	0.018528	0.598253	0.705632	2558	0.026445	0.020114	0.188719	0.989619
Colon cancer	Ratio of triglycerides to phosphoglycerides	4753	-0.00384	0.014428	0.790337	0.997663	2923	-0.01075	0.01908	0.573167	0.762014	2600	0.01178	0.01888	0.532711	0.644861	2555	-0.02425	0.019031	0.202756	0.807401
Proximal colon cancer	Ratio of triglycerides to phosphoglycerides	4753	-0.00063	0.014416	0.965036	0.982116	2923	-0.00677	0.018712	0.717621	0.917029	2600	0.015689	0.018183	0.388301	0.516239	2555	-0.00656	0.01894	0.728953	0.970622
Distal colon cancer	Ratio of triglycerides to phosphoglycerides	4753	0.012692	0.014182	0.370841	0.998606	2923	0.000494	0.018332	0.978511	0.989826	2600	0.017839	0.018361	0.331366	0.860196	2555	0.005644	0.019167	0.768406	0.983584
Rectal cancer	Ratio of triglycerides to phosphoglycerides	4753	-0.00163	0.014326	0.909442	0.999758	2923	0.018612	0.01898	0.326873	0.995226	2600	0.012597	0.019256	0.513064	0.98792	2555	-0.01223	0.018951	0.518797	0.983658
Colorectal cancer	Ratio of triglycerides to phosphoglycerides	4753	0.012077	0.014236	0.396284	0.603611	2923	0.026979	0.018613	0.147316	0.310342	2600	0.008858	0.018332	0.629017	0.726163	2555	-0.01374	0.018845	0.466048	0.989619
Proximal colon cancer	Remnant cholesterol (non-HDL, non-LDL -cholesterol)	4758	0.017928	0.014734	0.223743	0.901214	2927	0.024651	0.017975	0.170347	0.716767	2611	0.039528	0.019283	0.040478	0.150159	2559	0.01833	0.020149	0.363052	0.970622
Colon cancer	Remnant cholesterol (non-HDL, non-LDL -cholesterol)	4758	0.011931	0.014312	0.404534	0.892672	2927	0.010611	0.018138	0.558577	0.75246	2611	0.041825	0.019381	0.03102	0.111583	2559	-0.00563	0.020032	0.778714	0.972717
Distal colon cancer	Remnant cholesterol (non-HDL, non-LDL -cholesterol)	4758	0.009647	0.013866	0.486638	0.998606	2927	0.003205	0.01832	0.861138	0.989826	2611	0.006307	0.018752	0.736625	0.987198	2559	-0.00686	0.02017	0.733735	0.983584
Rectal cancer	Remnant cholesterol (non-HDL, non-LDL -cholesterol)	4758	0.004481	0.014225	0.752787	0.999758	2927	0.023103	0.018674	0.216131	0.995226	2611	0.003009	0.019687	0.878542	0.98792	2559	0.001229	0.020682	0.952635	0.983658
Colorectal cancer	Remnant cholesterol (non-HDL, non-LDL -cholesterol)	4758	0.027504	0.014217	0.053107	0.445308	2927	0.059233	0.018198	0.001147	0.032982	2611	0.057757	0.019125	0.002553	0.021396	2559	0.00315	0.019692	0.872919	0.989619
Distal colon cancer	Saturated fatty acids	4753	0.003568	0.01428	0.802698	0.998606	2918	-0.02088	0.01823	0.252186	0.989826	2601	0.014396	0.017805	0.418842	0.87548	2558	0.021623	0.020084	0.281744	0.928506
Colon cancer	Saturated fatty acids	4753	0.006535	0.014107	0.643203	0.992863	2918	-0.00196	0.018074	0.913433	0.94635	2601	0.05825	0.018539	0.001697	0.065053	2558	0.012047	0.019652	0.539926	0.967992
Proximal colon cancer	Saturated fatty acids	4753	-0.00717	0.014881	0.629908	0.901214	2918	-0.01835	0.017569	0.296368	0.717523	2601	0.026328	0.018224	0.148662	0.270099	2558	0.013792	0.019757	0.48519	0.970622
Rectal cancer	Saturated fatty acids	4753	0.00308	0.01442	0.83086	0.999758	2918	-0.00439	0.018354	0.811079	0.995226	2601	0.017445	0.01893	0.356844	0.98792	2558	0.020031	0.020577	0.330424	0.983658
Colorectal cancer	Saturated fatty acids	4753	0.03172	0.014038	0.023891	0.445308	2918	0.015643	0.017593	0.373973	0.527691	2601	0.041896	0.018137	0.020965	0.07654	2558	0.009184	0.019498	0.637663	0.989619
Colorectal cancer	Sphingomyelins	4691	0.023744	0.014148	0.093367	0.445308	2923	0.021591	0.017173	0.208753	0.366513	2433	0.048712	0.017415	0.005195	0.024088
Colon cancer	Sphingomyelins	4691	0.016956	0.014232	0.233571	0.892672	2923	0.014782	0.017461	0.397309	0.66508	2433	0.039899	0.017463	0.022408	0.094876
Proximal colon cancer	Sphingomyelins	4691	0.011002	0.01451	0.448376	0.901214	2923	0.009475	0.017081	0.579137	0.870598	2433	0.036517	0.017341	0.035318	0.13508
Distal colon cancer	Sphingomyelins	4691	0.007642	0.014331	0.593879	0.998606	2923	0.004277	0.016722	0.798125	0.989826	2433	0.012119	0.017391	0.485947	0.887047
Rectal cancer	Sphingomyelins	4691	0.014744	0.01464	0.313911	0.999758	2923	0.011987	0.017707	0.498486	0.995226	2433	0.014809	0.017916	0.408559	0.98792
Colon cancer	Total cholesterol	4758	0.018728	0.014171	0.186387	0.892672	2927	0.01732	0.01756	0.324049	0.655485	2611	0.048611	0.018206	0.00763	0.074602	2559	0.012275	0.019632	0.531878	0.967992
Proximal colon cancer	Total cholesterol	4758	0.010187	0.01472	0.488937	0.901214	2927	0.022723	0.017153	0.185366	0.716767	2611	0.038214	0.017808	0.03198	0.13508	2559	0.013795	0.019513	0.479639	0.970622
Distal colon cancer	Total cholesterol	4758	0.005	0.014249	0.725682	0.998606	2927	0.002023	0.017032	0.905442	0.989826	2611	0.001421	0.017624	0.93574	0.987198	2559	0.013639	0.019618	0.486968	0.983584
Rectal cancer	Total cholesterol	4758	0.002939	0.014534	0.839755	0.999758	2927	0.015712	0.017804	0.377582	0.995226	2611	0.00353	0.018315	0.847175	0.98792	2559	0.015904	0.020035	0.427377	0.983658
Colorectal cancer	Total cholesterol	4758	0.024631	0.014034	0.079316	0.445308	2927	0.040641	0.017581	0.020864	0.102102	2611	0.049093	0.018141	0.006851	0.029732	2559	0.010026	0.019042	0.598582	0.989619
Distal colon cancer	Total cholesterol in HDL2	4758	0.005689	0.014046	0.685493	0.998606	2927	0.000505	0.017565	0.977052	0.989826	2611	-0.01507	0.017277	0.383064	0.87548	2559	0.041351	0.017579	0.018735	0.341475
Distal colon cancer	Total cholesterol in HDL2	4758	0.012287	0.014235	0.388081	0.998606	2927	-0.0055	0.016888	0.744624	0.989826	2611	-0.00607	0.016836	0.718486	0.987198	2559	0.038532	0.018776	0.04026	0.49586
Colon cancer	Total cholesterol in HDL2	4758	0.019581	0.014337	0.172088	0.892672	2927	0.017098	0.018474	0.354777	0.655485	2611	0.012844	0.018109	0.478218	0.604229	2559	0.029419	0.017707	0.096746	0.663156
Colon cancer	Total cholesterol in HDL2	4758	0.021966	0.014351	0.125915	0.892672	2927	0.008745	0.017825	0.62373	0.779487	2611	0.031797	0.017693	0.072424	0.206473	2559	0.016956	0.018842	0.368245	0.89786
Proximal colon cancer	Total cholesterol in HDL2	4758	-0.00788	0.014324	0.582031	0.901214	2927	0.010167	0.017019	0.550284	0.870598	2611	0.002294	0.016397	0.888745	0.924938	2559	0.004631	0.018351	0.800796	0.970622
Rectal cancer	Total cholesterol in HDL2	4758	0.001386	0.014358	0.923123	0.999758	2927	-0.00432	0.018607	0.816364	0.995226	2611	0.0006	0.017675	0.972935	0.98792	2559	0.026948	0.017825	0.130716	0.983658
Rectal cancer	Total cholesterol in HDL2	4758	0.003555	0.01464	0.808131	0.999758	2927	-0.00062	0.018363	0.972957	0.995226	2611	0.006416	0.01703	0.706412	0.98792	2559	0.024319	0.018884	0.19793	0.983658
Colorectal cancer	Total cholesterol in HDL2	4758	0.00285	0.014022	0.838947	0.914492	2927	-0.01747	0.017941	0.330221	0.490005	2611	-0.01357	0.016638	0.414682	0.532831	2559	9.57e-05	0.017027	0.995514	0.995514
Colorectal cancer	Total cholesterol in HDL2	4758	0.01967	0.014086	0.162635	0.445308	2927	-0.00111	0.017277	0.94897	0.957294	2611	0.003669	0.016476	0.82379	0.906563	2559	0.004237	0.018244	0.816387	0.989619
Proximal colon cancer	Total cholesterol in HDL2	4758	-0.0061	0.014144	0.666492	0.901214	2927	0.013316	0.017759	0.453413	0.847846	2611	-0.01381	0.016815	0.41158	0.541354	2559	-0.00015	0.016914	0.992879	0.997764
Distal colon cancer	Total cholines	4754	0.003742	0.01475	0.799765	0.998606	2918	-0.00309	0.017092	0.856485	0.989826	2602	0.013381	0.016592	0.420035	0.87548	2558	0.02943	0.018726	0.116173	0.777602
Colon cancer	Total cholines	4754	0.013481	0.014357	0.347786	0.892672	2918	0.018254	0.017308	0.291663	0.655485	2602	0.05566	0.01753	0.001515	0.065053	2558	0.018986	0.018734	0.310919	0.89786
Proximal colon cancer	Total cholines	4754	-0.0159	0.014638	0.277285	0.901214	2918	0.013528	0.01681	0.421026	0.847846	2602	0.020904	0.016454	0.204023	0.340038	2558	0.011834	0.018393	0.520022	0.970622
Rectal cancer	Total cholines	4754	-0.00814	0.014782	0.58187	0.999758	2918	0.009006	0.017879	0.614506	0.995226	2602	0.024845	0.01733	0.15179	0.98792	2558	0.021156	0.019315	0.273477	0.983658
Colorectal cancer	Total cholines	4754	0.028497	0.01425	0.045587	0.445308	2918	0.018335	0.017123	0.284334	0.444908	2602	0.034915	0.01687	0.038589	0.121583	2558	0.00256	0.018242	0.888413	0.989619
Colon cancer	Total esterified cholesterol	4754	0.017836	0.014194	0.208977	0.892672	2925	0.016836	0.017553	0.337569	0.655485	2602	0.04497	0.018388	0.014524	0.074972	2558	0.012263	0.019726	0.534223	0.967992
Proximal colon cancer	Total esterified cholesterol	4754	0.012383	0.014756	0.401379	0.901214	2925	0.023374	0.017255	0.175629	0.716767	2602	0.034445	0.018011	0.055938	0.165634	2558	0.014533	0.019601	0.458492	0.970622
Distal colon cancer	Total esterified cholesterol	4754	0.004804	0.014205	0.735239	0.998606	2925	0.001913	0.016982	0.910311	0.989826	2602	-0.00119	0.017864	0.946843	0.987198	2558	0.014286	0.019723	0.468917	0.983584
Rectal cancer	Total esterified cholesterol	4754	0.004822	0.014514	0.739748	0.999758	2925	0.016244	0.017814	0.361917	0.995226	2602	0.002358	0.018468	0.898409	0.98792	2558	0.014611	0.020164	0.468761	0.983658
Colorectal cancer	Total esterified cholesterol	4754	0.023922	0.01404	0.088493	0.445308	2925	0.041402	0.017626	0.018894	0.100302	2602	0.04911	0.018342	0.007466	0.031798	2558	0.010459	0.019129	0.584597	0.989619
Distal colon cancer	Total fatty acids	4755	0.004582	0.014139	0.745884	0.998606	2924	-0.0153	0.017808	0.390327	0.989826	2602	0.019278	0.017527	0.271473	0.860196	2558	0.023868	0.020025	0.233406	0.867492
Proximal colon cancer	Total fatty acids	4755	-0.00347	0.014852	0.815035	0.901214	2924	-0.00027	0.017155	0.98763	0.997618	2602	0.030387	0.017961	0.090795	0.238933	2558	0.014565	0.019768	0.4613	0.970622
Colon cancer	Total fatty acids	4755	0.006642	0.014143	0.638665	0.992521	2924	0.000461	0.017539	0.979033	0.984556	2602	0.052822	0.018374	0.004076	0.074602	2558	0.008773	0.019582	0.654181	0.972717
Rectal cancer	Total fatty acids	4755	0.000953	0.014326	0.946974	0.999758	2924	0.003353	0.018227	0.854075	0.995226	2602	0.017842	0.018792	0.342497	0.98792	2558	0.018456	0.020325	0.363945	0.983658
Colorectal cancer	Total fatty acids	4755	0.030251	0.013899	0.029569	0.445308	2924	0.023444	0.017586	0.1826	0.335985	2602	0.038877	0.018011	0.030985	0.103284	2558	0.004371	0.019249	0.820374	0.989619
Proximal colon cancer	Total free cholesterol	4754	0.004119	0.014642	0.778499	0.901214	2925	0.020331	0.016948	0.230385	0.716767	2601	0.046148	0.017565	0.008659	0.118838	2558	0.009297	0.019388	0.631602	0.970622
Colon cancer	Total free cholesterol	4754	0.018434	0.014167	0.19326	0.892672	2925	0.015928	0.017758	0.369819	0.655485	2601	0.053829	0.018222	0.003164	0.072768	2558	0.011776	0.019634	0.548728	0.971161
Distal colon cancer	Total free cholesterol	4754	0.001899	0.014263	0.894097	0.998606	2925	0.001502	0.017361	0.931073	0.989826	2601	0.00611	0.017531	0.727464	0.987198	2558	0.013106	0.019606	0.503905	0.983584
Rectal cancer	Total free cholesterol	4754	-0.00198	0.014533	0.891778	0.999758	2925	0.01492	0.018033	0.408067	0.995226	2601	0.014466	0.018433	0.432675	0.98792	2558	0.017624	0.019793	0.373329	0.983658
Colorectal cancer	Total free cholesterol	4754	0.023292	0.01412	0.099092	0.445308	2925	0.035541	0.017625	0.04384	0.155125	2601	0.046467	0.017596	0.008323	0.03359	2558	0.009544	0.019045	0.616324	0.989619
Proximal colon cancer	Total lipids in chylomicrons and extremely large VLDL	4758	0.006209	0.014369	0.665675	0.901214	2927	-0.00899	0.018244	0.622235	0.880325	2611	0.027501	0.019005	0.148006	0.270099	2559	0.010437	0.019657	0.595493	0.970622
Colon cancer	Total lipids in chylomicrons and extremely large VLDL	4758	-7.4e-05	0.014243	0.995873	0.997663	2927	-0.01818	0.018594	0.328253	0.655485	2611	0.024463	0.01911	0.200605	0.374212	2559	-0.00988	0.019648	0.615085	0.972717
Distal colon cancer	Total lipids in chylomicrons and extremely large VLDL	4758	0.003016	0.014283	0.83278	0.998606	2927	-0.01086	0.0184	0.554915	0.989826	2611	0.029174	0.018897	0.122755	0.821788	2559	0.002668	0.020122	0.894544	0.983584
Rectal cancer	Total lipids in chylomicrons and extremely large VLDL	4758	2.31e-05	0.014145	0.998698	0.999758	2927	-0.00014	0.018988	0.994056	0.995226	2611	0.002582	0.019783	0.896183	0.98792	2559	-0.0045	0.020253	0.824371	0.983658
Colorectal cancer	Total lipids in chylomicrons and extremely large VLDL	4758	0.019522	0.014113	0.166652	0.445308	2927	0.029283	0.018447	0.112524	0.282299	2611	0.023806	0.019048	0.2115	0.370246	2559	-0.00546	0.019583	0.780365	0.989619
Proximal colon cancer	Total lipids in IDL	4758	0.009056	0.01472	0.538462	0.901214	2927	0.022487	0.017481	0.198413	0.716767	2611	0.041517	0.018425	0.024322	0.1221	2559	0.01729	0.019895	0.384875	0.970622
Colon cancer	Total lipids in IDL	4758	0.013905	0.014154	0.325957	0.892672	2927	0.019975	0.01782	0.262409	0.655485	2611	0.045737	0.018908	0.015636	0.078179	2559	0.00487	0.019977	0.807402	0.972717
Distal colon cancer	Total lipids in IDL	4758	-0.00068	0.014151	0.961494	0.998606	2927	0.005299	0.017528	0.762435	0.989826	2611	-0.00084	0.018345	0.96354	0.987198	2559	-0.00318	0.019915	0.872991	0.983584
Rectal cancer	Total lipids in IDL	4758	0.001755	0.014423	0.903139	0.999758	2927	0.020183	0.017859	0.258519	0.995226	2611	0.002558	0.018925	0.892505	0.98792	2559	0.006855	0.020435	0.737313	0.983658
Colorectal cancer	Total lipids in IDL	4758	0.020904	0.014062	0.137203	0.445308	2927	0.045273	0.017676	0.010476	0.085876	2611	0.056742	0.018659	0.002381	0.021396	2559	0.011101	0.019415	0.56751	0.989619
Distal colon cancer	Total lipids in large HDL	4758	0.004168	0.01418	0.768843	0.998606	2927	-0.00163	0.017506	0.925812	0.989826	2611	-0.01555	0.017079	0.362778	0.860196	2559	0.03782	0.017257	0.028497	0.423655
Colon cancer	Total lipids in large HDL	4758	0.01766	0.014337	0.218088	0.892672	2927	0.020619	0.018198	0.257295	0.655485	2611	0.01483	0.018093	0.41248	0.545233	2559	0.039726	0.017398	0.022495	0.524453
Rectal cancer	Total lipids in large HDL	4758	0.001079	0.01442	0.940346	0.999758	2927	-0.0019	0.01857	0.918514	0.995226	2611	0.004466	0.017566	0.799337	0.98792	2559	0.025609	0.017628	0.146423	0.983658
Colorectal cancer	Total lipids in large HDL	4758	0.005781	0.014134	0.682568	0.817659	2927	-0.01297	0.017554	0.459927	0.594288	2611	-0.01607	0.016663	0.334923	0.458525	2559	-0.00194	0.016993	0.909309	0.989619
Proximal colon cancer	Total lipids in large HDL	4758	-0.02074	0.014123	0.141999	0.901214	2927	0.00645	0.017599	0.714023	0.917029	2611	-0.02138	0.016814	0.203633	0.340038	2559	0.002254	0.016666	0.892413	0.993758
Proximal colon cancer	Total lipids in large LDL	4758	0.008847	0.014733	0.548187	0.901214	2927	0.021057	0.017294	0.223487	0.716767	2611	0.044762	0.01803	0.013105	0.1221	2559	0.015603	0.020087	0.437368	0.970622
Colon cancer	Total lipids in large LDL	4758	0.012774	0.014174	0.367516	0.892672	2927	0.017339	0.01762	0.325146	0.655485	2611	0.047626	0.018457	0.009926	0.074602	2559	0.005287	0.020003	0.791551	0.972717
Rectal cancer	Total lipids in large LDL	4758	0.000988	0.014471	0.945554	0.999758	2927	0.01862	0.017686	0.292513	0.995226	2611	0.003663	0.018508	0.843131	0.98792	2559	0.007904	0.020394	0.698355	0.983658
Colorectal cancer	Total lipids in large LDL	4758	0.019406	0.013954	0.164372	0.445308	2927	0.039014	0.017556	0.02634	0.116505	2611	0.053877	0.018268	0.003213	0.021396	2559	0.014254	0.019485	0.464522	0.989619
Distal colon cancer	Total lipids in large LDL	4758	-0.00147	0.014326	0.918027	0.998606	2927	0.004873	0.017294	0.778144	0.989826	2611	0.003399	0.017904	0.84946	0.987198	2559	0.000389	0.019908	0.984416	0.993325
Colon cancer	Total lipids in large VLDL	4758	-0.0014	0.014248	0.921872	0.997663	2927	-0.02419	0.018921	0.201273	0.655485	2611	0.018938	0.019176	0.323444	0.473165	2559	-0.02443	0.019486	0.210011	0.819261
Proximal colon cancer	Total lipids in large VLDL	4758	0.004274	0.014303	0.765093	0.901214	2927	-0.01377	0.01852	0.457304	0.848226	2611	0.02837	0.018891	0.133276	0.267216	2559	0.009947	0.019392	0.608043	0.970622
Distal colon cancer	Total lipids in large VLDL	4758	0.008071	0.014122	0.567679	0.998606	2927	-0.01326	0.01844	0.47199	0.989826	2611	0.028459	0.018597	0.126075	0.821788	2559	0.002644	0.020208	0.895925	0.983584
Rectal cancer	Total lipids in large VLDL	4758	-0.00012	0.014076	0.99337	0.999758	2927	0.002097	0.019002	0.912115	0.995226	2611	0.007778	0.019794	0.694407	0.98792	2559	-0.00815	0.019925	0.682405	0.983658
Colorectal cancer	Total lipids in large VLDL	4758	0.022657	0.014135	0.109019	0.445308	2927	0.021646	0.018495	0.241966	0.401455	2611	0.02209	0.018658	0.236526	0.380822	2559	-0.0119	0.019281	0.537299	0.989619
Distal colon cancer	Total lipids in medium HDL	4758	0.024265	0.014285	0.08946	0.998606	2927	-0.00069	0.017292	0.967955	0.989826	2611	-0.00348	0.017159	0.839378	0.987198	2559	0.047423	0.018377	0.00992	0.312786
Colon cancer	Total lipids in medium HDL	4758	0.033123	0.014735	0.024627	0.733164	2927	0.00231	0.018094	0.898402	0.946348	2611	0.010911	0.017771	0.539307	0.649427	2559	0.015175	0.01834	0.408064	0.89786
Proximal colon cancer	Total lipids in medium HDL	4758	0.009732	0.014797	0.510773	0.901214	2927	0.015816	0.017723	0.372267	0.815441	2611	0.001779	0.017356	0.918357	0.94372	2559	0.011232	0.018119	0.535388	0.970622
Rectal cancer	Total lipids in medium HDL	4758	0.01662	0.014481	0.251138	0.999758	2927	-0.01089	0.018159	0.548883	0.995226	2611	0.001866	0.017022	0.912739	0.98792	2559	0.024109	0.018691	0.197216	0.983658
Colorectal cancer	Total lipids in medium HDL	4758	0.01928	0.014318	0.178199	0.445308	2927	-0.01104	0.017502	0.528299	0.63606	2611	-0.00231	0.016282	0.88743	0.936279	2559	-0.01082	0.017899	0.545588	0.989619
Proximal colon cancer	Total lipids in medium LDL	4758	0.010488	0.014786	0.47815	0.901214	2927	0.020241	0.017311	0.242394	0.716767	2611	0.048453	0.018045	0.007296	0.118838	2559	0.012148	0.020127	0.546201	0.970622
Colon cancer	Total lipids in medium LDL	4758	0.012006	0.014248	0.399493	0.892672	2927	0.013152	0.017616	0.455352	0.680072	2611	0.048571	0.018418	0.00841	0.074602	2559	0.002406	0.019998	0.904239	0.972717
Distal colon cancer	Total lipids in medium LDL	4758	-0.00133	0.014383	0.926342	0.998606	2927	0.004734	0.017289	0.784241	0.989826	2611	0.006034	0.017839	0.735182	0.987198	2559	0.001357	0.019754	0.94524	0.983584
Rectal cancer	Total lipids in medium LDL	4758	0.000397	0.014477	0.97812	0.999758	2927	0.017842	0.01769	0.313258	0.995226	2611	0.0046	0.018521	0.803871	0.98792	2559	0.006974	0.020173	0.729594	0.983658
Colorectal cancer	Total lipids in medium LDL	4758	0.019243	0.013933	0.167317	0.445308	2927	0.038137	0.017602	0.030339	0.123562	2611	0.055099	0.018287	0.002611	0.021396	2559	0.015811	0.019635	0.420764	0.989619
Colon cancer	Total lipids in medium VLDL	4758	0.000141	0.01427	0.992137	0.997663	2927	-0.02336	0.018856	0.215581	0.655485	2611	0.018855	0.019116	0.324071	0.473165	2559	-0.02836	0.019318	0.142248	0.793982
Proximal colon cancer	Total lipids in medium VLDL	4758	0.006114	0.014291	0.668813	0.901214	2927	-0.01105	0.01855	0.551462	0.870598	2611	0.030614	0.018947	0.106274	0.253515	2559	0.011019	0.019173	0.565534	0.970622
Distal colon cancer	Total lipids in medium VLDL	4758	0.010976	0.014056	0.43492	0.998606	2927	-0.01252	0.01841	0.496512	0.989826	2611	0.025864	0.01862	0.16493	0.821788	2559	-0.00766	0.019821	0.69912	0.983584
Rectal cancer	Total lipids in medium VLDL	4758	0.001707	0.014069	0.903433	0.999758	2927	0.005525	0.019078	0.772146	0.995226	2611	0.009592	0.019752	0.627283	0.98792	2559	-0.01584	0.019854	0.425047	0.983658
Colorectal cancer	Total lipids in medium VLDL	4758	0.024464	0.014102	0.082832	0.445308	2927	0.025815	0.01851	0.163237	0.320853	2611	0.02786	0.018589	0.134064	0.277666	2559	-0.01453	0.019188	0.449027	0.989619
Distal colon cancer	Total lipids in small HDL	4758	0.018711	0.014328	0.191634	0.998606	2927	0.001607	0.017844	0.928243	0.989826	2611	0.006734	0.017442	0.699474	0.987198	2559	0.028087	0.019196	0.14355	0.777602
Colon cancer	Total lipids in small HDL	4758	0.018051	0.014819	0.223248	0.892672	2927	-0.01826	0.018237	0.316897	0.655485	2611	0.012692	0.018052	0.482057	0.604229	2559	-0.01765	0.019486	0.365147	0.89786
Proximal colon cancer	Total lipids in small HDL	4758	0.02423	0.015008	0.106479	0.901214	2927	0.011546	0.018089	0.523314	0.867347	2611	0.026245	0.017661	0.137382	0.267216	2559	0.011067	0.019584	0.572046	0.970622
Rectal cancer	Total lipids in small HDL	4758	0.015227	0.014269	0.285938	0.999758	2927	-0.00988	0.018343	0.590219	0.995226	2611	-0.00015	0.01788	0.993168	0.9932	2559	0.005327	0.019396	0.783614	0.983658
Colorectal cancer	Total lipids in small HDL	4758	0.013151	0.014377	0.360386	0.570912	2927	-0.02648	0.017698	0.134719	0.310342	2611	0.007121	0.016691	0.669681	0.758751	2559	-0.01403	0.019076	0.462078	0.989619
Proximal colon cancer	Total lipids in small LDL	4758	0.012552	0.014804	0.396553	0.901214	2927	0.020385	0.017429	0.24226	0.716767	2611	0.04913	0.018173	0.006905	0.118838	2559	0.010786	0.020024	0.590172	0.970622
Colon cancer	Total lipids in small LDL	4758	0.011859	0.014284	0.406434	0.892672	2927	0.011229	0.017713	0.526195	0.737956	2611	0.049498	0.01846	0.00738	0.074602	2559	0.002851	0.019983	0.886561	0.972717
Distal colon cancer	Total lipids in small LDL	4758	-0.00082	0.014396	0.954849	0.998606	2927	0.003491	0.017339	0.840438	0.989826	2611	0.006044	0.017863	0.735114	0.987198	2559	0.004165	0.01968	0.8324	0.983584
Rectal cancer	Total lipids in small LDL	4758	-0.00104	0.014483	0.942928	0.999758	2927	0.017018	0.017771	0.338321	0.995226	2611	0.004376	0.018572	0.813743	0.98792	2559	0.008081	0.020004	0.686258	0.983658
Colorectal cancer	Total lipids in small LDL	4758	0.019474	0.013957	0.163008	0.445308	2927	0.04012	0.01775	0.023875	0.110502	2611	0.055682	0.018477	0.002607	0.021396	2559	0.015456	0.019698	0.432729	0.989619
Colon cancer	Total lipids in small VLDL	4758	-0.00123	0.014403	0.931955	0.997663	2927	-0.02122	0.018525	0.252027	0.655485	2611	0.030371	0.019273	0.115188	0.27597	2559	-0.02368	0.019453	0.223597	0.819261
Proximal colon cancer	Total lipids in small VLDL	4758	0.012777	0.014464	0.377075	0.901214	2927	-0.00065	0.018569	0.972072	0.989276	2611	0.043919	0.019228	0.022447	0.1221	2559	0.016907	0.019521	0.386503	0.970622
Distal colon cancer	Total lipids in small VLDL	4758	0.006234	0.014002	0.656199	0.998606	2927	-0.00924	0.018552	0.618569	0.989826	2611	0.019621	0.018539	0.290006	0.860196	2559	-0.0033	0.01988	0.868318	0.983584
Rectal cancer	Total lipids in small VLDL	4758	-0.00112	0.014033	0.936275	0.999758	2927	0.009724	0.019111	0.610927	0.995226	2611	0.009561	0.019711	0.627669	0.98792	2559	-0.00553	0.019906	0.781246	0.983658
Colorectal cancer	Total lipids in small VLDL	4758	0.020031	0.014023	0.15324	0.445308	2927	0.033287	0.01846	0.071455	0.216246	2611	0.040637	0.018712	0.029966	0.101356	2559	-0.00615	0.019128	0.747982	0.989619
Colon cancer	Total lipids in very large HDL	4758	0.00813	0.01413	0.565082	0.984613	2927	0.021463	0.018188	0.238066	0.655485	2611	0.032739	0.018715	0.080344	0.215281	2559	0.036313	0.018119	0.045166	0.592474
Distal colon cancer	Total lipids in very large HDL	4758	-0.00715	0.014374	0.618811	0.998606	2927	-0.00645	0.017124	0.706259	0.989826	2611	-0.0128	0.017788	0.471923	0.887047	2559	0.025753	0.017497	0.141186	0.777602
Rectal cancer	Total lipids in very large HDL	4758	-0.00755	0.01443	0.600927	0.999758	2927	-0.00027	0.018488	0.988398	0.995226	2611	0.002355	0.018169	0.896888	0.98792	2559	0.025663	0.017682	0.146812	0.983658
Colorectal cancer	Total lipids in very large HDL	4758	0.002857	0.013936	0.83756	0.914492	2927	0.003316	0.017698	0.851369	0.902373	2611	-0.00839	0.017855	0.638627	0.730768	2559	0.00545	0.017844	0.760081	0.989619
Proximal colon cancer	Total lipids in very large HDL	4758	-0.02093	0.014162	0.139509	0.901214	2927	0.005445	0.017728	0.758741	0.917029	2611	-0.01197	0.017645	0.497481	0.628684	2559	-0.00101	0.017139	0.952975	0.993758
Colon cancer	Total lipids in very large VLDL	4758	-0.00109	0.014214	0.938617	0.997663	2927	-0.02311	0.018702	0.21666	0.655485	2611	0.02034	0.019079	0.286497	0.448134	2559	-0.02626	0.019661	0.181819	0.807401
Distal colon cancer	Total lipids in very large VLDL	4758	0.004603	0.014201	0.745852	0.998606	2927	-0.01349	0.018286	0.460781	0.989826	2611	0.029853	0.018716	0.11082	0.821788	2559	-0.00486	0.020005	0.808236	0.983584
Rectal cancer	Total lipids in very large VLDL	4758	-0.00028	0.014089	0.984055	0.999758	2927	-0.00086	0.018897	0.963627	0.995226	2611	0.004237	0.019735	0.829999	0.98792	2559	-0.00726	0.020253	0.719951	0.983658
Colorectal cancer	Total lipids in very large VLDL	4758	0.020303	0.014098	0.149887	0.445308	2927	0.023519	0.018567	0.20537	0.363348	2611	0.021207	0.018889	0.26165	0.385765	2559	-0.00869	0.019235	0.651369	0.989619
Proximal colon cancer	Total lipids in very large VLDL	4758	0.00464	0.01436	0.746631	0.901214	2927	-0.01376	0.018251	0.451085	0.847846	2611	0.026623	0.018824	0.157388	0.27633	2559	-0.00081	0.019642	0.967037	0.993758
Proximal colon cancer	Total lipids in very small VLDL	4758	0.013908	0.014771	0.346452	0.901214	2927	0.025417	0.017972	0.157383	0.716767	2611	0.04371	0.019265	0.02336	0.1221	2559	0.01972	0.020097	0.326574	0.970622
Colon cancer	Total lipids in very small VLDL	4758	0.011363	0.014356	0.428666	0.901474	2927	0.011954	0.018103	0.509092	0.727274	2611	0.043623	0.019399	0.024615	0.09666	2559	-0.00678	0.019961	0.733972	0.972717
Distal colon cancer	Total lipids in very small VLDL	4758	0.005651	0.013905	0.68446	0.998606	2927	0.005126	0.017951	0.77523	0.989826	2611	0.001034	0.018639	0.955752	0.987198	2559	-0.01101	0.020001	0.582029	0.983584
Rectal cancer	Total lipids in very small VLDL	4758	-0.00034	0.014384	0.980977	0.999758	2927	0.024955	0.01839	0.174886	0.995226	2611	0.006258	0.019327	0.746114	0.98792	2559	0.003209	0.020525	0.87578	0.983658
Colorectal cancer	Total lipids in very small VLDL	4758	0.023281	0.014222	0.101696	0.445308	2927	0.054077	0.017971	0.002643	0.046754	2611	0.062836	0.019056	0.000989	0.021396	2559	0.004359	0.019585	0.823872	0.989619
Colon cancer	Total triglycerides	4758	-0.003	0.014304	0.833746	0.997663	2927	-0.02485	0.019033	0.191838	0.655485	2611	0.02921	0.019325	0.13077	0.294775	2559	-0.02196	0.019683	0.26464	0.89786
Proximal colon cancer	Total triglycerides	4758	0.000415	0.01457	0.977259	0.986529	2927	-0.01176	0.018635	0.52795	0.867347	2611	0.036	0.019093	0.059476	0.168882	2559	0.011184	0.019626	0.568825	0.970622
Distal colon cancer	Total triglycerides	4758	0.004055	0.014082	0.773388	0.998606	2927	-0.01295	0.018654	0.487444	0.989826	2611	0.027898	0.018863	0.139269	0.821788	2559	0.00083	0.020161	0.967173	0.983584
Rectal cancer	Total triglycerides	4758	4.05e-05	0.014099	0.997706	0.999758	2927	0.005172	0.018868	0.784016	0.995226	2611	0.013465	0.019909	0.498876	0.98792	2559	-0.00345	0.020325	0.865219	0.983658
Colorectal cancer	Total triglycerides	4758	0.019095	0.014111	0.176044	0.445308	2927	0.017389	0.01862	0.350416	0.503723	2611	0.026741	0.018697	0.152769	0.300314	2559	-0.01226	0.019565	0.530931	0.989619
Proximal colon cancer	Triglycerides in chylomicrons and extremely large VLDL	4758	0.00633	0.014353	0.659198	0.901214	2927	-0.01025	0.018229	0.573812	0.870598	2611	0.02728	0.018928	0.149631	0.270099	2559	0.011431	0.019705	0.561894	0.970622
Colon cancer	Triglycerides in chylomicrons and extremely large VLDL	4758	-0.00095	0.014221	0.946913	0.997663	2927	-0.01845	0.018602	0.321321	0.655485	2611	0.023707	0.019083	0.214237	0.379695	2559	-0.00889	0.01967	0.651263	0.972717
Distal colon cancer	Triglycerides in chylomicrons and extremely large VLDL	4758	0.001789	0.014368	0.900902	0.998606	2927	-0.01127	0.018375	0.539639	0.989826	2611	0.029626	0.018874	0.116615	0.821788	2559	-0.00275	0.019997	0.890737	0.983584
Rectal cancer	Triglycerides in chylomicrons and extremely large VLDL	4758	-0.0014	0.014143	0.921212	0.999758	2927	-0.00113	0.018987	0.952412	0.995226	2611	0.002397	0.019751	0.903397	0.98792	2559	-0.00997	0.020351	0.624373	0.983658
Colorectal cancer	Triglycerides in chylomicrons and extremely large VLDL	4758	0.01908	0.014124	0.176796	0.445308	2927	0.029366	0.018452	0.111607	0.282299	2611	0.024329	0.019049	0.201651	0.362649	2559	-0.01231	0.019583	0.529499	0.989619
Colon cancer	Triglycerides in HDL	4758	0.002326	0.014331	0.871074	0.997663	2927	-0.00613	0.018516	0.740648	0.869128	2611	0.037185	0.018364	0.042981	0.139608	2559	0.016385	0.018955	0.387446	0.89786
Distal colon cancer	Triglycerides in HDL	4758	-0.00222	0.014021	0.874355	0.998606	2927	-0.01141	0.01825	0.531895	0.989826	2611	0.01573	0.018092	0.38469	0.87548	2559	0.019716	0.019416	0.310005	0.928506
Proximal colon cancer	Triglycerides in HDL	4758	-0.01035	0.014705	0.48155	0.901214	2927	0.006269	0.017931	0.726658	0.917029	2611	0.028337	0.017984	0.115234	0.258817	2559	0.018005	0.018897	0.340769	0.970622
Rectal cancer	Triglycerides in HDL	4758	0.002261	0.014115	0.872734	0.999758	2927	0.005081	0.018473	0.783307	0.995226	2611	0.010993	0.01897	0.562305	0.98792	2559	0.029115	0.020025	0.146088	0.983658
Colorectal cancer	Triglycerides in HDL	4758	0.017835	0.014193	0.208957	0.449888	2927	0.014464	0.018242	0.427923	0.565646	2611	0.022442	0.017968	0.211779	0.370246	2559	-0.00822	0.019027	0.665834	0.989619
Proximal colon cancer	Triglycerides in IDL	4758	-0.0158	0.014939	0.290358	0.901214	2927	-0.00073	0.017282	0.966443	0.989276	2611	0.033958	0.017285	0.049573	0.163782	2559	0.013097	0.019306	0.497609	0.970622
Distal colon cancer	Triglycerides in IDL	4758	-0.0106	0.014247	0.457101	0.998606	2927	-0.00981	0.017192	0.568279	0.989826	2611	0.015937	0.017315	0.357438	0.860196	2559	0.008621	0.019366	0.656256	0.983584
Rectal cancer	Triglycerides in IDL	4758	-0.00798	0.014354	0.578459	0.999758	2927	0.007667	0.017877	0.668046	0.995226	2611	0.014226	0.017495	0.416207	0.98792	2559	0.024778	0.019916	0.21357	0.983658
Colon cancer	Triglycerides in IDL	4758	-0.00457	0.014228	0.747936	0.997663	2927	-0.00902	0.017504	0.606499	0.779442	2611	0.045552	0.017708	0.010154	0.074602	2559	0.001316	0.019209	0.945399	0.985159
Colorectal cancer	Triglycerides in IDL	4758	0.00575	0.014045	0.682272	0.817659	2927	0.003596	0.01717	0.834125	0.896209	2611	0.029802	0.017039	0.080395	0.215009	2559	0.002926	0.019074	0.878104	0.989619
Colon cancer	Triglycerides in large HDL	4758	0.018209	0.014423	0.206843	0.892672	2927	0.01796	0.017739	0.311405	0.655485	2611	0.034614	0.018125	0.056283	0.1726	2559	0.041044	0.01783	0.021416	0.524453
Distal colon cancer	Triglycerides in large HDL	4758	-0.0003	0.014366	0.983473	0.998606	2927	-0.0078	0.017344	0.652898	0.989826	2611	-0.00596	0.017796	0.737877	0.987198	2559	0.025042	0.017486	0.152226	0.777602
Proximal colon cancer	Triglycerides in large HDL	4758	-0.02796	0.014806	0.059015	0.901214	2927	0.011387	0.016956	0.501932	0.867347	2611	-0.00763	0.017554	0.663934	0.759001	2559	0.010558	0.017051	0.535818	0.970622
Rectal cancer	Triglycerides in large HDL	4758	-0.00493	0.01435	0.730981	0.999758	2927	0.004199	0.017861	0.814159	0.995226	2611	0.011944	0.018225	0.512287	0.98792	2559	0.028094	0.018004	0.118787	0.983658
Colorectal cancer	Triglycerides in large HDL	4758	0.021978	0.014252	0.123101	0.445308	2927	0.032877	0.017747	0.064051	0.204606	2611	0.016183	0.017575	0.357243	0.480502	2559	0.001347	0.017962	0.940237	0.989619
Distal colon cancer	Triglycerides in large LDL	4758	-0.01069	0.014425	0.458739	0.998606	2927	-0.01113	0.017072	0.514481	0.989826	2611	0.012401	0.016962	0.464769	0.887047	2559	0.016967	0.018856	0.368292	0.966224
Proximal colon cancer	Triglycerides in large LDL	4758	-0.01615	0.014969	0.280562	0.901214	2927	0.002094	0.017145	0.902792	0.981265	2611	0.034153	0.016785	0.041983	0.153271	2559	0.011749	0.018763	0.531254	0.970622
Colon cancer	Triglycerides in large LDL	4758	-0.0027	0.014292	0.850323	0.997663	2927	-0.00648	0.017463	0.710519	0.842368	2611	0.048818	0.017207	0.004588	0.074602	2559	0.009498	0.018632	0.61025	0.972717
Rectal cancer	Triglycerides in large LDL	4758	-0.00578	0.014489	0.689911	0.999758	2927	0.003245	0.017736	0.854825	0.995226	2611	0.011548	0.01716	0.501044	0.98792	2559	0.029525	0.019406	0.128283	0.983658
Colorectal cancer	Triglycerides in large LDL	4758	0.005373	0.014105	0.703285	0.829516	2927	0.001344	0.016982	0.936939	0.953522	2611	0.028109	0.016734	0.093132	0.232822	2559	0.006574	0.018326	0.719813	0.989619
Colon cancer	Triglycerides in large VLDL	4758	-0.00231	0.014304	0.871963	0.997663	2927	-0.0255	0.018988	0.179466	0.655485	2611	0.01772	0.019137	0.354536	0.485437	2559	-0.02481	0.019407	0.201245	0.807401
Proximal colon cancer	Triglycerides in large VLDL	4758	0.003744	0.014314	0.793662	0.901214	2927	-0.01609	0.018543	0.385513	0.817562	2611	0.027116	0.018846	0.150316	0.270099	2559	0.00762	0.019284	0.692781	0.970622
Distal colon cancer	Triglycerides in large VLDL	4758	0.0075	0.014176	0.596784	0.998606	2927	-0.01305	0.018428	0.478851	0.989826	2611	0.029655	0.018526	0.109552	0.821788	2559	-0.00489	0.020039	0.807107	0.983584
Rectal cancer	Triglycerides in large VLDL	4758	-0.00125	0.014103	0.929593	0.999758	2927	0.000839	0.019012	0.964787	0.995226	2611	0.007428	0.019773	0.7072	0.98792	2559	-0.01551	0.019935	0.436554	0.983658
Colorectal cancer	Triglycerides in large VLDL	4758	0.021916	0.014171	0.122037	0.445308	2927	0.019216	0.018506	0.299191	0.452723	2611	0.020387	0.01862	0.273668	0.393397	2559	-0.01773	0.019224	0.356349	0.989619
Distal colon cancer	Triglycerides in LDL	4758	-0.00928	0.014473	0.52136	0.998606	2927	-0.00982	0.017102	0.565686	0.989826	2611	0.015478	0.01691	0.360114	0.860196	2559	0.021895	0.019005	0.249399	0.868999
Colon cancer	Triglycerides in LDL	4758	-0.00301	0.014331	0.833744	0.997663	2927	-0.00952	0.017545	0.587331	0.771921	2611	0.04841	0.017107	0.004693	0.074602	2559	0.011379	0.018686	0.542597	0.967992
Proximal colon cancer	Triglycerides in LDL	4758	-0.01284	0.015023	0.392717	0.901214	2927	0.001637	0.017144	0.923955	0.981265	2611	0.036038	0.016749	0.031511	0.13508	2559	0.012794	0.018882	0.498093	0.970622
Rectal cancer	Triglycerides in LDL	4758	-0.00378	0.014494	0.794518	0.999758	2927	0.002538	0.017668	0.885809	0.995226	2611	0.011485	0.017158	0.503315	0.98792	2559	0.031745	0.019396	0.101827	0.983658
Colorectal cancer	Triglycerides in LDL	4758	0.006052	0.014101	0.6678	0.81699	2927	-0.00054	0.016989	0.974763	0.97902	2611	0.027791	0.016647	0.095153	0.232822	2559	0.006627	0.018303	0.717333	0.989619
Proximal colon cancer	Triglycerides in medium HDL	4758	0.006852	0.014327	0.632507	0.901214	2927	0.00227	0.018064	0.899984	0.981265	2611	0.035361	0.01821	0.052267	0.163782	2559	0.030987	0.019482	0.111834	0.970622
Distal colon cancer	Triglycerides in medium HDL	4758	0.005163	0.014127	0.714776	0.998606	2927	-0.00704	0.018124	0.697596	0.989826	2611	0.020818	0.018181	0.252308	0.853394	2559	0.015762	0.019936	0.429244	0.983584
Rectal cancer	Triglycerides in medium HDL	4758	0.008147	0.014131	0.564252	0.999758	2927	0.001023	0.01846	0.95583	0.995226	2611	0.006485	0.019191	0.735455	0.98792	2559	0.013907	0.01985	0.483625	0.983658
Colon cancer	Triglycerides in medium HDL	4758	0.008271	0.014273	0.562276	0.984613	2927	-0.01148	0.018269	0.529969	0.738744	2611	0.022419	0.018807	0.23335	0.397559	2559	-0.00116	0.019477	0.952607	0.986837
Colorectal cancer	Triglycerides in medium HDL	4758	0.018607	0.014176	0.189402	0.445308	2927	0.01079	0.017816	0.5448	0.63606	2611	0.019772	0.018394	0.282508	0.403583	2559	-0.02028	0.01909	0.288092	0.989619
Distal colon cancer	Triglycerides in medium LDL	4758	-0.00931	0.014573	0.522899	0.998606	2927	-0.00653	0.016927	0.699695	0.989826	2611	0.016022	0.016573	0.333753	0.860196	2559	0.026157	0.01868	0.161551	0.777602
Colon cancer	Triglycerides in medium LDL	4758	-0.00149	0.014344	0.917192	0.997663	2927	-0.00873	0.017448	0.616897	0.779442	2611	0.046812	0.016724	0.005162	0.074602	2559	0.016357	0.01837	0.373315	0.89786
Proximal colon cancer	Triglycerides in medium LDL	4758	-0.01198	0.015045	0.425842	0.901214	2927	0.001555	0.016989	0.927092	0.981265	2611	0.035193	0.01642	0.032176	0.13508	2559	0.012067	0.018535	0.515063	0.970622
Rectal cancer	Triglycerides in medium LDL	4758	-0.00177	0.014537	0.903078	0.999758	2927	0.002093	0.017493	0.90477	0.995226	2611	0.01066	0.016737	0.524233	0.98792	2559	0.034197	0.019033	0.0725	0.983658
Colorectal cancer	Triglycerides in medium LDL	4758	0.005474	0.014106	0.697978	0.827499	2927	-0.00602	0.016878	0.72145	0.807355	2611	0.025524	0.016278	0.116989	0.256263	2559	0.007981	0.017867	0.655139	0.989619
Colon cancer	Triglycerides in medium VLDL	4758	-0.00302	0.014298	0.832652	0.997663	2927	-0.02578	0.019023	0.175535	0.655485	2611	0.016262	0.019113	0.394931	0.525053	2559	-0.03342	0.019127	0.080711	0.655464
Proximal colon cancer	Triglycerides in medium VLDL	4758	0.005421	0.014219	0.703047	0.901214	2927	-0.01751	0.018621	0.347082	0.779185	2611	0.028905	0.018718	0.122641	0.263622	2559	0.008428	0.018887	0.655459	0.970622
Distal colon cancer	Triglycerides in medium VLDL	4758	0.008268	0.014186	0.560013	0.998606	2927	-0.01213	0.018409	0.509944	0.989826	2611	0.028686	0.018425	0.119619	0.821788	2559	-0.00925	0.019672	0.638231	0.983584
Rectal cancer	Triglycerides in medium VLDL	4758	-0.00152	0.014134	0.9142	0.999758	2927	0.001698	0.019116	0.929224	0.995226	2611	0.008974	0.019698	0.648747	0.98792	2559	-0.01775	0.019554	0.364026	0.983658
Colorectal cancer	Triglycerides in medium VLDL	4758	0.021379	0.014158	0.131095	0.445308	2927	0.02027	0.018445	0.271883	0.434258	2611	0.022803	0.018421	0.215865	0.370515	2559	-0.01449	0.018972	0.445022	0.989619
Colon cancer	Triglycerides in small HDL	4758	-0.01211	0.014434	0.401486	0.892672	2927	-0.02154	0.019064	0.258614	0.655485	2611	0.034549	0.01924	0.072659	0.206473	2559	-0.01803	0.019864	0.364008	0.89786
Proximal colon cancer	Triglycerides in small HDL	4758	-0.0053	0.014648	0.717281	0.901214	2927	-0.00259	0.018492	0.8887	0.981265	2611	0.042066	0.018477	0.022886	0.1221	2559	0.012847	0.019462	0.509241	0.970622
Distal colon cancer	Triglycerides in small HDL	4758	-0.00982	0.014179	0.488474	0.998606	2927	-0.00838	0.018759	0.655245	0.989826	2611	0.022762	0.018537	0.219592	0.839813	2559	0.001945	0.02004	0.922687	0.983584
Rectal cancer	Triglycerides in small HDL	4758	-0.00139	0.014149	0.921818	0.999758	2927	0.006461	0.018951	0.733164	0.995226	2611	0.014093	0.01958	0.471724	0.98792	2559	0.009257	0.020099	0.645126	0.983658
Colorectal cancer	Triglycerides in small HDL	4758	0.006432	0.014335	0.653688	0.815292	2927	-0.00631	0.018656	0.735032	0.808887	2611	0.021156	0.018351	0.249067	0.380822	2559	-0.00734	0.019419	0.705547	0.989619
Distal colon cancer	Triglycerides in small LDL	4758	-0.00382	0.014429	0.79124	0.998606	2927	-0.0096	0.017617	0.585961	0.989826	2611	0.021864	0.017262	0.2054	0.821788	2559	0.026747	0.019806	0.176999	0.789415
Proximal colon cancer	Triglycerides in small LDL	4758	-0.00255	0.015004	0.86498	0.908427	2927	0.000147	0.01742	0.99328	0.997618	2611	0.039758	0.017337	0.021909	0.1221	2559	0.01384	0.019623	0.48068	0.970622
Colon cancer	Triglycerides in small LDL	4758	-0.00234	0.014355	0.870781	0.997663	2927	-0.01696	0.01804	0.347138	0.655485	2611	0.045318	0.017562	0.00992	0.074602	2559	0.00701	0.019335	0.716961	0.972717
Rectal cancer	Triglycerides in small LDL	4758	0.000104	0.014414	0.994251	0.999758	2927	0.003435	0.0179	0.847853	0.995226	2611	0.012659	0.017901	0.479517	0.98792	2559	0.028504	0.01999	0.154022	0.983658
Colorectal cancer	Triglycerides in small LDL	4758	0.010819	0.014044	0.441123	0.625643	2927	0.002991	0.017413	0.863653	0.907033	2611	0.028604	0.017112	0.09472	0.232822	2559	0.002187	0.01897	0.90823	0.989619
Colon cancer	Triglycerides in small VLDL	4758	-0.00569	0.014363	0.69203	0.997663	2927	-0.03023	0.019007	0.111858	0.655485	2611	0.023696	0.019521	0.224904	0.388932	2559	-0.03109	0.01921	0.105699	0.681073
Proximal colon cancer	Triglycerides in small VLDL	4758	0.004077	0.01439	0.776927	0.901214	2927	-0.01756	0.018746	0.34894	0.779185	2611	0.036617	0.019223	0.056905	0.165672	2559	0.011509	0.019005	0.544838	0.970622
Distal colon cancer	Triglycerides in small VLDL	4758	0.004919	0.014165	0.728394	0.998606	2927	-0.01278	0.018576	0.491647	0.989826	2611	0.028811	0.018845	0.126434	0.821788	2559	-0.00554	0.019771	0.779324	0.983584
Rectal cancer	Triglycerides in small VLDL	4758	-0.00257	0.014073	0.855113	0.999758	2927	0.004105	0.01895	0.828535	0.995226	2611	0.014014	0.020006	0.483688	0.98792	2559	-0.01091	0.019516	0.576224	0.983658
Colorectal cancer	Triglycerides in small VLDL	4758	0.018405	0.014151	0.193438	0.445308	2927	0.01627	0.01866	0.383338	0.537608	2611	0.025719	0.018637	0.167706	0.324138	2559	-0.00856	0.018973	0.652095	0.989619
Colon cancer	Triglycerides in very large HDL	4758	0.00061	0.014396	0.966206	0.997663	2927	0.009373	0.018499	0.61243	0.779442	2611	0.048509	0.018966	0.010593	0.074602	2559	0.038748	0.01927	0.044453	0.592474
Proximal colon cancer	Triglycerides in very large HDL	4758	-0.02944	0.014807	0.04684	0.901214	2927	0.007111	0.017705	0.687954	0.909365	2611	0.000623	0.018341	0.972899	0.981024	2559	0.0122	0.018989	0.52063	0.970622
Distal colon cancer	Triglycerides in very large HDL	4758	-0.00321	0.014175	0.820694	0.998606	2927	-0.01065	0.018523	0.565395	0.989826	2611	-0.00129	0.018696	0.94491	0.987198	2559	0.015978	0.019359	0.40924	0.983584
Rectal cancer	Triglycerides in very large HDL	4758	0.000197	0.01421	0.988913	0.999758	2927	0.00397	0.0187	0.831907	0.995226	2611	0.005221	0.019074	0.784341	0.98792	2559	0.030664	0.019894	0.123341	0.983658
Colorectal cancer	Triglycerides in very large HDL	4758	0.017258	0.014377	0.230058	0.46819	2927	0.030908	0.018186	0.089324	0.246366	2611	0.016646	0.01865	0.372171	0.49767	2559	0.005909	0.01937	0.760343	0.989619
Colon cancer	Triglycerides in very large VLDL	4758	-0.00317	0.014277	0.82426	0.997663	2927	-0.02301	0.018801	0.221202	0.655485	2611	0.018554	0.019087	0.331079	0.476332	2559	-0.02546	0.019567	0.193291	0.807401
Distal colon cancer	Triglycerides in very large VLDL	4758	0.003601	0.014246	0.800453	0.998606	2927	-0.01357	0.018282	0.45805	0.989826	2611	0.029974	0.018614	0.107466	0.821788	2559	-0.00748	0.020035	0.708992	0.983584
Rectal cancer	Triglycerides in very large VLDL	4758	-0.00214	0.014088	0.879298	0.999758	2927	-0.00058	0.018887	0.975482	0.995226	2611	0.002956	0.019805	0.881373	0.98792	2559	-0.01558	0.020465	0.446603	0.983658
Colorectal cancer	Triglycerides in very large VLDL	4758	0.019647	0.014185	0.166107	0.445308	2927	0.022242	0.018536	0.230243	0.389382	2611	0.019961	0.018802	0.288499	0.409597	2559	-0.02117	0.0194	0.275278	0.989619
Proximal colon cancer	Triglycerides in very large VLDL	4758	0.002917	0.014329	0.838681	0.901214	2927	-0.01499	0.018275	0.412152	0.847846	2611	0.025439	0.018791	0.175917	0.301947	2559	0.002034	0.019678	0.917662	0.993758
Colon cancer	Triglycerides in very small VLDL	4758	-0.00725	0.014325	0.612873	0.985666	2927	-0.02437	0.018525	0.188404	0.655485	2611	0.035221	0.019096	0.065233	0.192353	2559	-0.01843	0.019745	0.350636	0.89786
Proximal colon cancer	Triglycerides in very small VLDL	4758	-0.00088	0.014687	0.95212	0.973279	2927	-0.00953	0.018278	0.602157	0.880325	2611	0.041901	0.018832	0.026166	0.122819	2559	0.013306	0.019844	0.5026	0.970622
Distal colon cancer	Triglycerides in very small VLDL	4758	-0.00194	0.014067	0.890508	0.998606	2927	-0.0119	0.018277	0.515146	0.989826	2611	0.024026	0.018475	0.193565	0.821788	2559	0.003888	0.020092	0.846582	0.983584
Rectal cancer	Triglycerides in very small VLDL	4758	-0.0043	0.01404	0.759331	0.999758	2927	0.010078	0.018722	0.590417	0.995226	2611	0.016021	0.019289	0.406273	0.98792	2559	0.009367	0.020191	0.64273	0.983658
Colorectal cancer	Triglycerides in very small VLDL	4758	0.012872	0.014056	0.359833	0.570912	2927	0.011443	0.018288	0.531545	0.63606	2611	0.031308	0.018248	0.086337	0.228247	2559	-0.00295	0.019542	0.879869	0.989619
Colon cancer	Triglycerides in VLDL	4758	-0.00303	0.014295	0.832251	0.997663	2927	-0.02651	0.018959	0.162075	0.655485	2611	0.020453	0.019235	0.287744	0.448134	2559	-0.03032	0.019349	0.117279	0.72648
Proximal colon cancer	Triglycerides in VLDL	4758	0.004662	0.014313	0.744645	0.901214	2927	-0.01611	0.018641	0.387453	0.817562	2611	0.031961	0.018988	0.092457	0.238933	2559	0.010076	0.019176	0.599334	0.970622
Distal colon cancer	Triglycerides in VLDL	4758	0.006782	0.014136	0.631431	0.998606	2927	-0.01184	0.018481	0.521675	0.989826	2611	0.029146	0.018666	0.118535	0.821788	2559	-0.00502	0.019899	0.800907	0.983584
Rectal cancer	Triglycerides in VLDL	4758	-0.00093	0.014098	0.947414	0.999758	2927	0.002733	0.019005	0.885658	0.995226	2611	0.010393	0.01982	0.600068	0.98792	2559	-0.01241	0.019779	0.530514	0.983658
Colorectal cancer	Triglycerides in VLDL	4758	0.020663	0.014142	0.144049	0.445308	2927	0.019653	0.018576	0.290157	0.444908	2611	0.024413	0.018579	0.188954	0.353329	2559	-0.01349	0.019146	0.481031	0.989619
Proximal colon cancer	Triglycerides to total lipids ratio in chylomicrons and extremely large VLDL	4758	-0.00607	0.014397	0.673225	0.901214	2927	-0.01959	0.017675	0.26775	0.716767	2611	-0.01849	0.018323	0.312951	0.447073	2559	-0.01077	0.01912	0.573475	0.970622
Colon cancer	Triglycerides to total lipids ratio in chylomicrons and extremely large VLDL	4758	-0.0305	0.014092	0.0305	0.733164	2927	0.003263	0.017558	0.852594	0.91634	2611	-0.02759	0.018313	0.132008	0.294775	2559	-0.00203	0.019012	0.915125	0.972717
Distal colon cancer	Triglycerides to total lipids ratio in chylomicrons and extremely large VLDL	4758	-0.02398	0.014217	0.091772	0.998606	2927	0.000542	0.018043	0.976027	0.989826	2611	-0.01966	0.018041	0.275828	0.860196	2559	0.015006	0.019356	0.438246	0.983584
Rectal cancer	Triglycerides to total lipids ratio in chylomicrons and extremely large VLDL	4758	-0.0286	0.014321	0.045872	0.999758	2927	-0.01698	0.01829	0.353225	0.995226	2611	-0.01422	0.019094	0.456357	0.98792	2559	-0.01302	0.019152	0.496663	0.983658
Colorectal cancer	Triglycerides to total lipids ratio in chylomicrons and extremely large VLDL	4758	-0.02593	0.013834	0.060973	0.445308	2927	-0.01827	0.017848	0.306107	0.460161	2611	-0.00085	0.018626	0.963812	0.979342	2559	0.004575	0.019076	0.810466	0.989619
Distal colon cancer	Triglycerides to total lipids ratio in IDL	4758	-0.01476	0.014365	0.304396	0.998606	2927	-0.02085	0.018694	0.264803	0.989826	2611	0.024804	0.019052	0.193052	0.821788	2559	0.018001	0.019164	0.347671	0.953558
Proximal colon cancer	Triglycerides to total lipids ratio in IDL	4758	-0.02877	0.015078	0.05641	0.901214	2927	-0.03048	0.018497	0.099502	0.716767	2611	-0.00342	0.019163	0.858418	0.905671	2559	-0.00763	0.018985	0.687965	0.970622
Rectal cancer	Triglycerides to total lipids ratio in IDL	4758	-0.01063	0.014401	0.460396	0.999758	2927	-0.01638	0.018698	0.381146	0.995226	2611	0.017487	0.019788	0.376921	0.98792	2559	0.025396	0.019836	0.200562	0.983658
Colon cancer	Triglycerides to total lipids ratio in IDL	4758	-0.02151	0.014509	0.13834	0.892672	2927	-0.03704	0.019819	0.061756	0.655485	2611	0.009824	0.019596	0.616163	0.708587	2559	-0.00049	0.019613	0.97988	0.988335
Colorectal cancer	Triglycerides to total lipids ratio in IDL	4758	-0.01471	0.014718	0.317708	0.525704	2927	-0.05565	0.018806	0.003108	0.047649	2611	-0.02973	0.018816	0.114276	0.255219	2559	-0.00939	0.019589	0.631658	0.989619
Distal colon cancer	Triglycerides to total lipids ratio in large HDL	4758	-0.00252	0.013836	0.855708	0.998606	2927	-0.00443	0.018368	0.80955	0.989826	2611	0.006898	0.018501	0.709271	0.987198	2559	-0.03227	0.019521	0.098396	0.756629
Proximal colon cancer	Triglycerides to total lipids ratio in large HDL	4758	0.002846	0.014174	0.840889	0.901214	2927	0.000908	0.018425	0.960706	0.989276	2611	0.017228	0.018139	0.342309	0.477158	2559	0.006299	0.019739	0.749651	0.970622
Colon cancer	Triglycerides to total lipids ratio in large HDL	4758	-0.00594	0.014191	0.675777	0.997663	2927	-0.01088	0.01899	0.566896	0.758059	2611	0.005606	0.018733	0.764742	0.829487	2559	-0.00571	0.0199	0.774081	0.972717
Rectal cancer	Triglycerides to total lipids ratio in large HDL	4758	-0.00425	0.014098	0.762859	0.999758	2927	0.009317	0.018903	0.622124	0.995226	2611	0.004261	0.018899	0.821617	0.98792	2559	0.002268	0.019919	0.909359	0.983658
Colorectal cancer	Triglycerides to total lipids ratio in large HDL	4758	0.010902	0.014128	0.440359	0.625643	2927	0.039048	0.018614	0.03601	0.135774	2611	0.030394	0.018347	0.097718	0.234116	2559	-0.00122	0.019663	0.950414	0.989619
Distal colon cancer	Triglycerides to total lipids ratio in large LDL	4758	-0.01799	0.014334	0.209563	0.998606	2927	-0.02667	0.018722	0.15443	0.989826	2611	0.016238	0.018867	0.389513	0.87548	2559	0.023056	0.01815	0.204097	0.849074
Proximal colon cancer	Triglycerides to total lipids ratio in large LDL	4758	-0.03174	0.015187	0.036675	0.901214	2927	-0.02343	0.018422	0.203523	0.716767	2611	-0.00641	0.01905	0.736449	0.805255	2559	-0.00716	0.01812	0.692676	0.970622
Colon cancer	Triglycerides to total lipids ratio in large LDL	4758	-0.0215	0.014553	0.139688	0.892672	2927	-0.03249	0.019852	0.101783	0.655485	2611	0.01188	0.019548	0.543426	0.650979	2559	0.009633	0.018479	0.602201	0.972717
Rectal cancer	Triglycerides to total lipids ratio in large LDL	4758	-0.0096	0.014418	0.505502	0.999758	2927	-0.02005	0.018823	0.286834	0.995226	2611	0.012861	0.019662	0.513116	0.98792	2559	0.033031	0.019032	0.08277	0.983658
Colorectal cancer	Triglycerides to total lipids ratio in large LDL	4758	-0.01648	0.014685	0.261708	0.476377	2927	-0.05423	0.018692	0.003745	0.049719	2611	-0.03159	0.018696	0.091177	0.232822	2559	-0.00743	0.018672	0.690645	0.989619
Distal colon cancer	Triglycerides to total lipids ratio in large VLDL	4758	-0.01131	0.014169	0.424758	0.998606	2927	0.014593	0.017527	0.405128	0.989826	2611	-0.00964	0.018129	0.595138	0.953302	2559	0.020282	0.020174	0.314803	0.928506
Proximal colon cancer	Triglycerides to total lipids ratio in large VLDL	4758	-0.01586	0.014335	0.268569	0.901214	2927	-0.00091	0.017627	0.958751	0.989276	2611	-0.02849	0.018919	0.132211	0.267216	2559	-0.01316	0.019703	0.504256	0.970622
Colon cancer	Triglycerides to total lipids ratio in large VLDL	4758	-0.02346	0.014029	0.09459	0.892672	2927	0.019963	0.017589	0.256483	0.655485	2611	-0.02062	0.018739	0.271266	0.43973	2559	-0.00213	0.02003	0.915357	0.972717
Rectal cancer	Triglycerides to total lipids ratio in large VLDL	4758	-0.01893	0.014272	0.184751	0.999758	2927	-0.01501	0.018633	0.420646	0.995226	2611	-0.01181	0.019473	0.54414	0.98792	2559	-0.00071	0.019921	0.971723	0.989472
Colorectal cancer	Triglycerides to total lipids ratio in large VLDL	4758	-0.02309	0.013945	0.097837	0.445308	2927	-0.02631	0.017888	0.141369	0.310342	2611	-0.0295	0.018681	0.114478	0.255219	2559	0.008987	0.019681	0.647964	0.989619
Distal colon cancer	Triglycerides to total lipids ratio in medium HDL	4758	-0.00389	0.014002	0.781188	0.998606	2927	-0.00758	0.018446	0.681274	0.989826	2611	0.023648	0.018745	0.207234	0.821788	2559	-0.02444	0.019465	0.209413	0.849074
Colon cancer	Triglycerides to total lipids ratio in medium HDL	4758	-0.00425	0.014291	0.766081	0.997663	2927	-0.01296	0.018724	0.489058	0.71192	2611	0.018483	0.019271	0.337595	0.476362	2559	-0.01436	0.019575	0.463314	0.956657
Proximal colon cancer	Triglycerides to total lipids ratio in medium HDL	4758	0.002734	0.014258	0.847943	0.901214	2927	-0.0049	0.01826	0.788418	0.920488	2611	0.037345	0.018722	0.046182	0.160937	2559	0.015455	0.01902	0.416542	0.970622
Rectal cancer	Triglycerides to total lipids ratio in medium HDL	4758	0.002806	0.014106	0.84235	0.999758	2927	0.005429	0.018894	0.773893	0.995226	2611	0.005639	0.019395	0.771257	0.98792	2559	-0.00386	0.019314	0.841671	0.983658
Colorectal cancer	Triglycerides to total lipids ratio in medium HDL	4758	0.010466	0.014143	0.45933	0.63383	2927	0.014981	0.018358	0.41453	0.557887	2611	0.022097	0.018967	0.244129	0.380822	2559	-0.00885	0.019107	0.643327	0.989619
Distal colon cancer	Triglycerides to total lipids ratio in medium LDL	4758	-0.01369	0.014503	0.34535	0.998606	2927	-0.01787	0.018021	0.321564	0.989826	2611	0.020303	0.017872	0.256036	0.853453	2559	0.027457	0.017584	0.118538	0.777602
Colon cancer	Triglycerides to total lipids ratio in medium LDL	4758	-0.01358	0.014606	0.352408	0.892672	2927	-0.02975	0.019046	0.118339	0.655485	2611	0.017647	0.01832	0.335503	0.476332	2559	0.017277	0.018059	0.338825	0.89786
Proximal colon cancer	Triglycerides to total lipids ratio in medium LDL	4758	-0.02359	0.015409	0.12582	0.901214	2927	-0.02126	0.017928	0.235735	0.716767	2611	0.006734	0.017871	0.706348	0.788136	2559	-0.00394	0.017791	0.824726	0.974427
Rectal cancer	Triglycerides to total lipids ratio in medium LDL	4758	-0.00351	0.014529	0.809199	0.999758	2927	-0.01846	0.018449	0.317026	0.995226	2611	0.009505	0.018579	0.608959	0.98792	2559	0.032649	0.018634	0.079878	0.983658
Colorectal cancer	Triglycerides to total lipids ratio in medium LDL	4758	-0.01174	0.014566	0.420114	0.615453	2927	-0.05054	0.017822	0.0046	0.05568	2611	-0.01952	0.017211	0.256908	0.385765	2559	-0.0082	0.018364	0.655189	0.989619
Colon cancer	Triglycerides to total lipids ratio in medium VLDL	4758	-0.02152	0.014229	0.130524	0.892672	2927	-0.01122	0.017359	0.518038	0.730973	2611	-0.01671	0.018051	0.35458	0.485437	2559	-0.02632	0.019216	0.170984	0.807401
Proximal colon cancer	Triglycerides to total lipids ratio in medium VLDL	4758	-0.00372	0.014565	0.798549	0.901214	2927	-0.02968	0.016874	0.078664	0.716767	2611	-0.01538	0.017822	0.388214	0.516239	2559	-0.01179	0.018139	0.515673	0.970622
Distal colon cancer	Triglycerides to total lipids ratio in medium VLDL	4758	-0.01619	0.014624	0.26836	0.998606	2927	4.76e-05	0.017083	0.997777	0.998664	2611	0.012612	0.017415	0.469013	0.887047	2559	0.003342	0.018999	0.860405	0.983584
Rectal cancer	Triglycerides to total lipids ratio in medium VLDL	4758	-0.01855	0.014527	0.201728	0.999758	2927	-0.02228	0.017862	0.212268	0.995226	2611	-0.00473	0.018577	0.798939	0.98792	2559	-0.00103	0.019185	0.957192	0.983658
Colorectal cancer	Triglycerides to total lipids ratio in medium VLDL	4758	-0.01638	0.014128	0.246424	0.476377	2927	-0.02687	0.017311	0.120655	0.292112	2611	-0.02684	0.018005	0.136148	0.277666	2559	-0.00236	0.018938	0.900668	0.989619
Proximal colon cancer	Triglycerides to total lipids ratio in small HDL	4758	-0.01491	0.014616	0.307645	0.901214	2927	-0.00819	0.018616	0.659825	0.892705	2611	0.03187	0.018908	0.092001	0.238933	2559	0.007285	0.019057	0.702315	0.970622
Colon cancer	Triglycerides to total lipids ratio in small HDL	4758	-0.01845	0.014467	0.202209	0.892672	2927	-0.01693	0.01912	0.375895	0.659968	2611	0.032804	0.019615	0.094562	0.239003	2559	-0.01122	0.019662	0.568126	0.972717
Distal colon cancer	Triglycerides to total lipids ratio in small HDL	4758	-0.01591	0.014037	0.257142	0.998606	2927	-0.01076	0.018791	0.56698	0.989826	2611	0.018953	0.018793	0.313309	0.860196	2559	-0.01732	0.01953	0.375244	0.973015
Rectal cancer	Triglycerides to total lipids ratio in small HDL	4758	-0.00658	0.01415	0.642099	0.999758	2927	0.012696	0.019288	0.510425	0.995226	2611	0.014846	0.019375	0.443613	0.98792	2559	0.003654	0.019779	0.853454	0.983658
Colorectal cancer	Triglycerides to total lipids ratio in small HDL	4758	0.002951	0.014357	0.837137	0.914492	2927	0.006737	0.019193	0.72562	0.807355	2611	0.019632	0.018775	0.295806	0.417394	2559	-0.00298	0.019275	0.87696	0.989619
Distal colon cancer	Triglycerides to total lipids ratio in small LDL	4758	-0.00612	0.014317	0.669079	0.998606	2927	-0.01843	0.018536	0.320198	0.989826	2611	0.030864	0.018714	0.099228	0.821788	2559	0.0289	0.018995	0.128259	0.777602
Colon cancer	Triglycerides to total lipids ratio in small LDL	4758	-0.01359	0.014599	0.351988	0.892672	2927	-0.03769	0.019634	0.055	0.655485	2611	0.017119	0.019076	0.369567	0.499004	2559	0.004697	0.019067	0.805423	0.972717
Rectal cancer	Triglycerides to total lipids ratio in small LDL	4758	0.002902	0.014425	0.840545	0.999758	2927	-0.01316	0.018472	0.476337	0.995226	2611	0.012819	0.019374	0.508225	0.98792	2559	0.027894	0.019553	0.15383	0.983658
Colorectal cancer	Triglycerides to total lipids ratio in small LDL	4758	-0.00426	0.014286	0.765643	0.881025	2927	-0.03927	0.018125	0.030342	0.123562	2611	-0.01473	0.017901	0.410815	0.531478	2559	-0.01539	0.019158	0.421821	0.989619
Proximal colon cancer	Triglycerides to total lipids ratio in small LDL	4758	-0.01467	0.015299	0.337584	0.901214	2927	-0.02292	0.018377	0.212432	0.716767	2611	0.014809	0.018638	0.426951	0.557948	2559	0.002439	0.018701	0.89626	0.993758
Colon cancer	Triglycerides to total lipids ratio in small VLDL	4758	-0.01335	0.014301	0.350435	0.892672	2927	-0.03388	0.019363	0.080314	0.655485	2611	-0.00174	0.019464	0.9289	0.954977	2559	-0.02391	0.019507	0.220363	0.819261
Proximal colon cancer	Triglycerides to total lipids ratio in small VLDL	4758	-0.01458	0.014547	0.316426	0.901214	2927	-0.04219	0.018427	0.022109	0.716767	2611	-0.00317	0.018968	0.86715	0.906566	2559	-0.01519	0.01857	0.413392	0.970622
Distal colon cancer	Triglycerides to total lipids ratio in small VLDL	4758	0.000255	0.014434	0.985909	0.998606	2927	-0.0164	0.018336	0.371142	0.989826	2611	0.032441	0.018902	0.086237	0.821788	2559	-0.00101	0.0197	0.95909	0.983584
Rectal cancer	Triglycerides to total lipids ratio in small VLDL	4758	-0.00661	0.01453	0.649347	0.999758	2927	-0.01083	0.018424	0.556878	0.995226	2611	0.016078	0.019974	0.420937	0.98792	2559	-0.01152	0.019704	0.558736	0.983658
Colorectal cancer	Triglycerides to total lipids ratio in small VLDL	4758	0.00781	0.014561	0.591737	0.768924	2927	-0.02567	0.018814	0.17249	0.330607	2611	-0.02232	0.01889	0.237494	0.380822	2559	-0.01711	0.018801	0.362923	0.989619
Distal colon cancer	Triglycerides to total lipids ratio in very large HDL	4758	0.004225	0.013988	0.762647	0.998606	2927	-0.00411	0.018951	0.828166	0.989826	2611	0.003635	0.019675	0.853448	0.987198	2559	-0.02678	0.019254	0.164312	0.777602
Colon cancer	Triglycerides to total lipids ratio in very large HDL	4758	-0.00382	0.014259	0.788609	0.997663	2927	-0.00401	0.019053	0.833443	0.912818	2611	0.018553	0.019503	0.34153	0.478029	2559	-0.01748	0.01964	0.373567	0.89786
Proximal colon cancer	Triglycerides to total lipids ratio in very large HDL	4758	-0.01224	0.014448	0.396952	0.901214	2927	0.004823	0.01834	0.792568	0.92066	2611	0.011493	0.018543	0.535435	0.65586	2559	0.008826	0.019335	0.648097	0.970622
Rectal cancer	Triglycerides to total lipids ratio in very large HDL	4758	0.006759	0.014015	0.62962	0.999758	2927	0.009766	0.018798	0.603448	0.995226	2611	0.000601	0.019738	0.975717	0.98792	2559	-0.02194	0.0195	0.260615	0.983658
Colorectal cancer	Triglycerides to total lipids ratio in very large HDL	4758	0.017851	0.014198	0.208719	0.449888	2927	0.027429	0.018829	0.145294	0.310342	2611	0.019503	0.018749	0.29833	0.418389	2559	-0.01929	0.019241	0.316134	0.989619
Distal colon cancer	Triglycerides to total lipids ratio in very large VLDL	4758	-0.0059	0.014554	0.685398	0.998606	2927	-0.01414	0.017774	0.426486	0.989826	2611	-0.00622	0.018655	0.738889	0.987198	2559	0.018393	0.019361	0.342221	0.953558
Colon cancer	Triglycerides to total lipids ratio in very large VLDL	4758	-0.01612	0.014471	0.265346	0.892672	2927	-0.03464	0.017672	0.050093	0.655485	2611	-0.03081	0.018347	0.093212	0.238208	2559	-0.00483	0.018936	0.798678	0.972717
Rectal cancer	Triglycerides to total lipids ratio in very large VLDL	4758	-0.01005	0.014346	0.483647	0.999758	2927	-0.01384	0.01815	0.445892	0.995226	2611	-0.00508	0.018925	0.788365	0.98792	2559	-0.01564	0.019258	0.416901	0.983658
Colorectal cancer	Triglycerides to total lipids ratio in very large VLDL	4758	-0.00091	0.014601	0.950358	0.984605	2927	-0.03527	0.018222	0.052998	0.180577	2611	-0.02709	0.018901	0.151915	0.300314	2559	-0.00307	0.019164	0.872707	0.989619
Proximal colon cancer	Triglycerides to total lipids ratio in very large VLDL	4758	-0.01628	0.014283	0.254472	0.901214	2927	-0.03909	0.017672	0.02704	0.716767	2611	-0.00976	0.018894	0.605519	0.714752	2559	0.002821	0.019039	0.882233	0.993758
Distal colon cancer	Triglycerides to total lipids ratio in very small VLDL	4758	-0.00416	0.014411	0.772815	0.998606	2927	-0.01259	0.0189	0.505512	0.989826	2611	0.034667	0.019222	0.071426	0.821788	2559	0.023015	0.019852	0.246421	0.868999
Colon cancer	Triglycerides to total lipids ratio in very small VLDL	4758	-0.01576	0.014348	0.272061	0.892672	2927	-0.03828	0.019898	0.054505	0.655485	2611	0.003856	0.019699	0.844837	0.89545	2559	-0.01563	0.020071	0.436282	0.917839
Proximal colon cancer	Triglycerides to total lipids ratio in very small VLDL	4758	-0.01331	0.014727	0.365972	0.901214	2927	-0.0373	0.018476	0.043588	0.716767	2611	0.008119	0.019479	0.676858	0.763124	2559	-0.00761	0.019032	0.689219	0.970622
Rectal cancer	Triglycerides to total lipids ratio in very small VLDL	4758	-0.00103	0.014479	0.943429	0.999758	2927	-0.01108	0.018436	0.548043	0.995226	2611	0.01608	0.020047	0.422546	0.98792	2559	0.012699	0.019866	0.522733	0.983658
Colorectal cancer	Triglycerides to total lipids ratio in very small VLDL	4758	-0.00058	0.014547	0.968384	0.990357	2927	-0.04558	0.018807	0.015426	0.093313	2611	-0.0257	0.018894	0.173818	0.330398	2559	-0.00907	0.019491	0.641803	0.989619
Distal colon cancer	Tyrosine	4745	0.01516	0.014236	0.286979	0.998606	2905	-0.01065	0.018031	0.554637	0.989826	2610	0.024036	0.017601	0.172172	0.821788	2559	-0.01703	0.018241	0.350636	0.953558
Proximal colon cancer	Tyrosine	4745	-0.00484	0.01455	0.739673	0.901214	2905	0.010126	0.018128	0.576485	0.870598	2610	-0.00053	0.018348	0.976759	0.981024	2559	0.009506	0.018246	0.602414	0.970622
Colon cancer	Tyrosine	4745	0.001625	0.013887	0.906859	0.997663	2905	0.002091	0.01836	0.909317	0.946348	2610	0.019288	0.018741	0.303477	0.46225	2559	0.001657	0.018616	0.929097	0.972717
Rectal cancer	Tyrosine	4745	-0.00617	0.014168	0.663342	0.999758	2905	0.002107	0.019229	0.912746	0.995226	2610	0.04661	0.018836	0.013405	0.98792	2559	-0.02966	0.018778	0.114384	0.983658
Colorectal cancer	Tyrosine	4745	0.007043	0.014606	0.629686	0.804599	2905	-0.00871	0.018101	0.630351	0.717726	2610	0.020871	0.017862	0.242723	0.380822	2559	-0.01955	0.017746	0.27072	0.989619
Colon cancer	Valine	4760	0.004857	0.014161	0.731635	0.997663	2927	0.029507	0.017718	0.095952	0.655485	2610	-0.01146	0.017654	0.516238	0.631568	2557	0.026074	0.017501	0.136385	0.793982
Proximal colon cancer	Valine	4760	0.00581	0.014756	0.693759	0.901214	2927	0.022065	0.017239	0.200685	0.716767	2610	-0.03715	0.017333	0.032181	0.13508	2557	0.033846	0.017434	0.052316	0.970622
Distal colon cancer	Valine	4760	0.007508	0.014226	0.597691	0.998606	2927	0.014973	0.017288	0.38652	0.989826	2610	0.000988	0.016814	0.953148	0.987198	2557	0.006706	0.017147	0.695765	0.983584
Rectal cancer	Valine	4760	0.008296	0.014107	0.556494	0.999758	2927	0.025378	0.017808	0.154235	0.995226	2610	0.028687	0.017468	0.100657	0.98792	2557	-0.00392	0.017771	0.8255	0.983658
Colorectal cancer	Valine	4760	0.0138	0.014498	0.341206	0.552658	2927	0.002463	0.017595	0.8887	0.92457	2610	0.000464	0.017027	0.978254	0.984264	2557	-0.00042	0.017295	0.980743	0.989619
Colon cancer	VLDL cholesterol	4758	0.007037	0.014369	0.624365	0.985666	2927	-0.00455	0.018419	0.804763	0.90733	2611	0.034514	0.019246	0.073032	0.206473	2559	-0.01652	0.019795	0.404147	0.89786
Proximal colon cancer	VLDL cholesterol	4758	0.017112	0.0145	0.238002	0.901214	2927	0.014944	0.018458	0.418222	0.847846	2611	0.037405	0.019356	0.053407	0.163782	2559	0.01616	0.019843	0.415495	0.970622
Distal colon cancer	VLDL cholesterol	4758	0.013018	0.013894	0.348806	0.998606	2927	-0.00383	0.018641	0.837331	0.989826	2611	0.012348	0.018616	0.507199	0.904308	2559	-0.00941	0.020094	0.639602	0.983584
Rectal cancer	VLDL cholesterol	4758	0.004483	0.014174	0.751776	0.999758	2927	0.017781	0.019243	0.35554	0.995226	2611	0.005823	0.019699	0.767564	0.98792	2559	-0.00505	0.020583	0.806238	0.983658
Colorectal cancer	VLDL cholesterol	4758	0.02643	0.0141	0.060933	0.445308	2927	0.053675	0.018424	0.003602	0.049719	2611	0.049905	0.018899	0.008325	0.03359	2559	-0.00662	0.019495	0.734069	0.989619

## Sheet: Supplementary File 1d
Supplementary File 1d: Associations of genetic liability to colorectal cancer (excluding SNPs in the FADS gene region) with metabolic traits at different early life stages among ALSPAC offspring
		Childhood (age 8y)					Early Adolescence (age 16y)					Late Adolescence (age 18y)					Early Adulthood (age 25y)
Exposure	Outcome	N	Beta	SE	P-value	P-value (adjusted)	N	Beta	SE	P-value	P-value (adjusted)	N	Beta	SE	P-value	P-value (adjusted)	N	Beta	SE	P-value	P-value (adjusted)
Colorectal cancer	Alanine	4759	0.0114697	0.0144408	0.427085	0.742788	2927	0.00229794	0.0187754	0.902598	0.930931	2610	0.0195104	0.0182594	0.285389	0.397752	2559	-0.0219585	0.0195851	0.262314	0.997113
Colorectal cancer	Glutamine	4751	-0.00296686	0.0142142	0.834672	0.914793	2926	-0.0137513	0.017348	0.428035	0.543912	2610	-0.0122895	0.0168498	0.465848	0.579163	2516	-0.014113	0.0172835	0.414259	0.997113
Colorectal cancer	Histidine	4753	0.000523464	0.014234	0.970665	0.983494	2751	0.00647746	0.0185615	0.727136	0.815811	2610	0.00936593	0.0183599	0.610004	0.694559	2559	-0.0107715	0.0186734	0.564098	0.997113
Colorectal cancer	Phenylalanine	4748	0.0259865	0.014454	0.0722599	0.579836	2925	-0.0158989	0.0180062	0.377325	0.516576	2609	0.0255343	0.0181095	0.158661	0.258809	2558	0.00566084	0.0192268	0.768457	0.997113
Colorectal cancer	Tyrosine	4745	0.00774416	0.0145836	0.59543	0.805083	2905	-0.0108305	0.01817	0.551177	0.656844	2610	0.0212346	0.0178169	0.233438	0.348641	2559	-0.0187159	0.0177297	0.291241	0.997113
Colorectal cancer	Isoleucine	4759	0.0210866	0.0146612	0.150426	0.629054	2926	0.00998839	0.0176002	0.570408	0.676257	2610	-0.00456631	0.0172935	0.791764	0.854957	2556	0.00693061	0.0174136	0.690664	0.997113
Colorectal cancer	Leucine	4759	0.0119974	0.0148088	0.417893	0.742788	2927	-0.0177724	0.0161169	0.270239	0.411622	2610	-0.0140208	0.0155516	0.367371	0.480087	2559	0.00289964	0.0166121	0.861447	0.997113
Colorectal cancer	Valine	4760	0.0136735	0.0145286	0.346678	0.690546	2927	0.00127149	0.0174931	0.942061	0.958735	2610	-0.000167622	0.0168898	0.992082	0.992082	2557	-0.000645702	0.0172972	0.970225	0.997113
Colorectal cancer	Apolipoprotein A1	4758	0.00810581	0.0139598	0.561502	0.768723	2927	-0.0026665	0.0173135	0.877611	0.924405	2611	0.00362561	0.0164092	0.825149	0.880258	2559	-0.00205843	0.0175349	0.90656	0.997113
Colorectal cancer	Apolipoprotein B	4758	0.019681	0.014014	0.160271	0.658255	2927	0.0447861	0.018293	0.0144129	0.174472	2611	0.0535724	0.018982	0.00480469	0.0643855	2559	0.00520394	0.019683	0.791502	0.997113
Colorectal cancer	Ratio of apolipoprotein B to apolipoprotein A1	4758	0.0168069	0.0140944	0.233144	0.682438	2927	0.0478815	0.0185457	0.00987675	0.140662	2611	0.0537164	0.0187222	0.00414909	0.0643855	2559	0.00744006	0.0187864	0.692112	0.997113
Colorectal cancer	Total cholesterol in HDL2	4758	-0.0063941	0.0140182	0.648318	0.813082	2927	-0.0240149	0.017914	0.180165	0.331503	2611	-0.0210559	0.0165738	0.204045	0.310797	2559	-0.00411694	0.0169479	0.808089	0.997113
Colorectal cancer	Total cholesterol in HDL2	4758	0.0107107	0.0140715	0.446597	0.742788	2927	-0.00785709	0.017247	0.648738	0.753585	2611	-0.00284406	0.0164744	0.862952	0.906296	2559	0.00115883	0.0181925	0.949215	0.997113
Colorectal cancer	HDL cholesterol	4758	-3.85267e-05	0.0140387	0.99781	0.998372	2927	-0.0183047	0.0176304	0.299241	0.444035	2611	-0.0151945	0.0163961	0.354161	0.465469	2559	-0.00299565	0.0169845	0.860013	0.997113
Colorectal cancer	LDL cholesterol	4758	0.0101659	0.014031	0.468778	0.751821	2927	0.0339352	0.0178247	0.0570297	0.281996	2611	0.0479646	0.0186423	0.0101402	0.0643855	2559	0.013516	0.0196203	0.490961	0.997113
Colorectal cancer	Remnant cholesterol (non-HDL, non-LDL -cholesterol)	4758	0.02143	0.0142544	0.132804	0.608926	2927	0.053918	0.01824	0.00314116	0.0939437	2611	0.053673	0.0191702	0.00515084	0.0643855	2559	0.0048478	0.0197093	0.805728	0.997113
Colorectal cancer	Total cholesterol	4758	0.0137045	0.0140802	0.330447	0.690546	2927	0.0316354	0.0176137	0.0725878	0.281996	2611	0.0402696	0.0181711	0.0267682	0.102611	2559	0.00749527	0.0190813	0.694495	0.997113
Colorectal cancer	VLDL cholesterol	4758	0.0248832	0.0141218	0.0781264	0.579836	2927	0.0525711	0.0184555	0.0044228	0.113027	2611	0.050718	0.0189186	0.00738975	0.0643855	2559	-0.0020632	0.0194677	0.915606	0.997113
Colorectal cancer	Total esterified cholesterol	4754	0.0134917	0.0140858	0.3382	0.690546	2925	0.0328083	0.0176625	0.0633388	0.281996	2602	0.0403245	0.0183617	0.0281711	0.103344	2558	0.00791368	0.019173	0.679824	0.997113
Colorectal cancer	Ratio of conjugated linoeic acid to total fatty acids	4753	0.0138133	0.0146037	0.344259	0.690546	2921	0.0209781	0.0182277	0.249871	0.393632	2601	0.00221821	0.019141	0.90775	0.934323
Colorectal cancer	Ratio of docosahexaenoic acid to total fatty acids	4755	-0.0161131	0.0143296	0.260875	0.682438	2922	-0.0026822	0.0186179	0.885459	0.924405	2602	0.0214404	0.0186568	0.250579	0.362473	2558	0.00197256	0.01974	0.92041	0.997113
Colorectal cancer	Ratio of omega-3 fatty acids to total fatty acids	4755	-0.0027075	0.0145749	0.852637	0.914793	2922	0.0214676	0.0188589	0.255078	0.399102	2602	0.0474389	0.0189061	0.0121615	0.0643855	2558	0.0144266	0.0201383	0.473825	0.997113
Colorectal cancer	Ratio of omega-6 fatty acids to total fatty acids	4755	-0.0174218	0.0143955	0.226251	0.682438	2922	0.0186994	0.0190591	0.326613	0.469506	2602	-0.0268967	0.0187431	0.151402	0.256708	2558	0.0127837	0.0196423	0.515216	0.997113
Colorectal cancer	Ratio of linoleic acid to total fatty acids	4755	-0.0189622	0.0142058	0.181998	0.682438	2918	0.0241596	0.0187979	0.198814	0.353842	2601	-0.0220967	0.0188749	0.24183	0.354273	2558	0.00680281	0.01968	0.729618	0.997113
Colorectal cancer	Ratio of monounsaturated fatty acids to total fatty acids	4753	0.016759	0.0143063	0.241478	0.682438	2918	0.00300089	0.0187733	0.873011	0.924405	2602	0.0134116	0.0189666	0.479558	0.58786	2558	-0.0253355	0.0197921	0.200631	0.997113
Colorectal cancer	Ratio of polyunsaturated fatty acids to total fatty acids	4755	-0.0184375	0.0143823	0.19992	0.682438	2918	0.0233951	0.0189765	0.217733	0.365055	2601	-0.0146852	0.0187374	0.433266	0.547534	2558	0.0160422	0.0199857	0.422231	0.997113
Colorectal cancer	Ratio of saturated fatty acids to total fatty acids	4753	0.00580926	0.0146987	0.692696	0.840164	2917	-0.0296981	0.0175063	0.0899125	0.281996	2601	0.0041295	0.0185518	0.82387	0.880258	2558	0.0146474	0.0200897	0.466008	0.997113
Colorectal cancer	Conjugated linoleic acid	4753	0.0148825	0.0145502	0.306435	0.690546	2922	0.0208623	0.0181177	0.249625	0.393632	2601	0.00678266	0.0190903	0.722399	0.802666
Colorectal cancer	Docosahexaenoic acid	4755	0.00238352	0.0141248	0.866003	0.917217	2923	0.00796197	0.0178414	0.65544	0.756527	2602	0.0368095	0.0180706	0.0417529	0.137188	2558	-0.000947306	0.0181555	0.958392	0.997113
Colorectal cancer	Estimated description of fatty acid chain length, not actual carbon number	4754	0.001569	0.0145383	0.914062	0.947001	2917	0.0151232	0.0184212	0.411732	0.539407	2601	-0.0309158	0.0193973	0.111099	0.22528
Colorectal cancer	Omega-3 fatty acids	4755	0.0158439	0.0142734	0.267041	0.682438	2923	0.0292871	0.0181475	0.10667	0.288636	2602	0.0601249	0.0185543	0.00120833	0.0643855	2558	0.0130259	0.0190372	0.493891	0.997113
Colorectal cancer	Omega-6 fatty acids	4755	0.0155915	0.0140212	0.266199	0.682438	2923	0.0231582	0.0177983	0.193311	0.351124	2602	0.0283349	0.0180036	0.115645	0.227337	2558	0.00904292	0.0190958	0.635857	0.997113
Colorectal cancer	Linoleic acid	4755	0.0130204	0.0139953	0.352242	0.690546	2919	0.0283385	0.0179919	0.115348	0.290265	2601	0.0264079	0.0179821	0.142072	0.251358	2558	0.00830561	0.0193525	0.667832	0.997113
Colorectal cancer	Monounsaturated fatty acids	4753	0.0259375	0.0139304	0.0626739	0.579836	2919	0.013981	0.0180764	0.439327	0.555193	2602	0.0337929	0.0181409	0.0626029	0.17523	2558	-0.00596459	0.019413	0.75868	0.997113
Colorectal cancer	Polyunsaturated fatty acids	4755	0.0162137	0.0140131	0.247314	0.682438	2919	0.0272972	0.0176433	0.121931	0.290265	2601	0.0340381	0.0180167	0.05897	0.170726	2558	0.00965024	0.0190536	0.612564	0.997113
Colorectal cancer	Saturated fatty acids	4753	0.0247956	0.0140154	0.0769309	0.579836	2918	0.00817085	0.0176094	0.642679	0.750336	2601	0.0382777	0.0181364	0.0349063	0.118066	2558	0.00730215	0.0194849	0.707871	0.997113
Colorectal cancer	Total fatty acids	4755	0.0245204	0.0138857	0.0774825	0.579836	2924	0.0179415	0.017623	0.308729	0.452197	2602	0.0370743	0.0180489	0.0400654	0.133551	2558	0.00479778	0.0192561	0.80326	0.997113
Colorectal cancer	Degree of unsaturation	4754	-0.0135279	0.0142359	0.342026	0.690546	2923	0.0307426	0.0184877	0.0964466	0.286709	2602	-0.00991479	0.0181782	0.585511	0.683591
Colorectal cancer	Albumin	4751	0.0206512	0.0140996	0.14308	0.609413	2927	0.0322677	0.0182886	0.0777749	0.281996	2611	0.0346248	0.0178046	0.0519166	0.155075	2559	-0.00102998	0.018286	0.955087	0.997113
Colorectal cancer	Creatinine	4752	0.00227169	0.0138116	0.869363	0.917217	2925	0.000489377	0.0172372	0.977352	0.985926	2610	-0.0105869	0.0157302	0.500986	0.609665	2559	-0.00706422	0.0150078	0.637893	0.997113
Colorectal cancer	Total free cholesterol	4754	0.0119716	0.0141623	0.397976	0.73818	2925	0.0261591	0.0176657	0.138772	0.295532	2601	0.0387218	0.0176471	0.0283074	0.103344	2558	0.00717225	0.0190656	0.706808	0.997113
Colorectal cancer	Citrate	4751	-0.00668646	0.0146576	0.648283	0.813082	2912	-0.0284131	0.0187501	0.129792	0.293026	2610	-0.0335434	0.0196578	0.0880592	0.209224	2559	0.00490642	0.0192411	0.798746	0.997113
Colorectal cancer	Glucose	4737	-0.0018869	0.0145388	0.896743	0.937504	2920	0.012117	0.0185609	0.513918	0.62873	2610	0.0161405	0.0189457	0.394329	0.509526	2555	-0.0164852	0.0188489	0.381876	0.997113
Colorectal cancer	Lactate	4759	-2.9191e-05	0.0143083	0.998372	0.998372	2920	-0.0291663	0.0189799	0.124476	0.290265	2610	0.00225475	0.0199336	0.90995	0.934323	2559	-0.0231527	0.0190306	0.223866	0.997113
Colorectal cancer	Glycoprotein acetyls	4759	0.00280479	0.0141838	0.843252	0.914793	2925	0.0268607	0.017802	0.131443	0.293514	2610	0.0325899	0.0184328	0.0771709	0.192927	2559	-0.0195268	0.0193476	0.312945	0.997113
Colorectal cancer	Acetoacetate	4755	0.0171021	0.0141872	0.228087	0.682438	2927	-0.0302786	0.0185778	0.103246	0.287611	2610	0.00549815	0.0185867	0.767399	0.840484	2559	0.00300623	0.0187458	0.872604	0.997113
Colorectal cancer	Acetate	4760	-0.016105	0.0143529	0.261887	0.682438	2925	-0.01233	0.0183391	0.501424	0.616725	2608	-0.00924732	0.0187974	0.622798	0.702175	2559	0.00779164	0.0194739	0.689112	0.997113
Colorectal cancer	3-Hydroxybutyrate	4757	-0.0265278	0.0141182	0.0603088	0.579836	2925	-0.0147156	0.0181866	0.418499	0.540757	2607	0.0135842	0.0185177	0.463271	0.579088	2554	0.0256028	0.0184259	0.164802	0.997113
Colorectal cancer	Average diameter for HDL particles	4758	-0.0034443	0.0141479	0.807667	0.906585	2927	-0.0056502	0.0175088	0.74694	0.833963	2611	-0.0207822	0.0176651	0.239519	0.353137	2559	-0.00173535	0.017497	0.921003	0.997113
Colorectal cancer	Average diameter for LDL particles	4758	-0.0132326	0.0140934	0.347817	0.690546	2927	-0.00742247	0.0181455	0.68253	0.781005	2611	-0.0219857	0.0186298	0.238053	0.353137	2559	-0.00433317	0.0194191	0.823444	0.997113
Colorectal cancer	Average diameter for VLDL particles	4758	0.0246788	0.014203	0.0823501	0.579836	2927	0.0187197	0.0182305	0.304585	0.449068	2611	0.0195485	0.0182619	0.284515	0.397752	2559	-0.0151178	0.0184186	0.411841	0.997113
Colorectal cancer	Cholesterol in chylomicrons and extremely large VLDL	4758	0.0274224	0.0140694	0.0513449	0.579836	2927	0.02881	0.0186055	0.121617	0.290265	2611	0.0270294	0.0190119	0.155231	0.256866	2559	-0.00868498	0.0191882	0.650861	0.997113
Colorectal cancer	Cholesteryl esters in chylomicrons and extremely large VLDL	4758	0.0315209	0.0140189	0.0245926	0.579836	2927	0.0329513	0.0187205	0.0784824	0.281996	2611	0.0215672	0.0190573	0.257863	0.370679	2559	-0.00850861	0.0191072	0.656134	0.997113
Colorectal cancer	Free cholesterol in chylomicrons and extremely large VLDL	4758	0.0227744	0.0141227	0.106896	0.583528	2927	0.0289714	0.0185627	0.118696	0.290265	2611	0.0286311	0.0191048	0.13409	0.24284	2559	-0.0125022	0.0192707	0.516547	0.997113
Colorectal cancer	Total lipids in chylomicrons and extremely large VLDL	4758	0.0228052	0.0141323	0.10666	0.583528	2927	0.0316362	0.018514	0.0875993	0.281996	2611	0.0303104	0.0190158	0.111067	0.22528	2559	-0.00113768	0.0195055	0.953493	0.997113
Colorectal cancer	Concentration of chylomicrons and extremely large VLDL particles	4758	0.0225205	0.0141251	0.110923	0.583528	2927	0.0314698	0.0185051	0.0891244	0.281996	2611	0.0326149	0.0190057	0.086269	0.209224	2559	-0.000971134	0.019499	0.960282	0.997113
Colorectal cancer	Phospholipids in chylomicrons and extremely large VLDL	4758	0.0215514	0.0141176	0.126936	0.595821	2927	0.0311697	0.0184595	0.0914138	0.281996	2611	0.0308183	0.019132	0.107339	0.224436	2559	-0.0112385	0.018899	0.552125	0.997113
Colorectal cancer	Triglycerides in chylomicrons and extremely large VLDL	4758	0.0223895	0.0141395	0.113382	0.583528	2927	0.0319313	0.0185156	0.0847116	0.281996	2611	0.0309115	0.0190092	0.104043	0.220401	2559	-0.00776015	0.01958	0.691894	0.997113
Colorectal cancer	Cholesterol in IDL	4758	0.0134927	0.0143023	0.345528	0.690546	2927	0.0429757	0.0179629	0.0167983	0.191843	2611	0.0500999	0.0190665	0.00864826	0.0643855	2559	0.00974362	0.0195176	0.617665	0.997113
Colorectal cancer	Cholesteryl esters in IDL	4758	0.0164384	0.0144097	0.254018	0.682438	2927	0.0472629	0.0180511	0.00888289	0.136204	2611	0.0525073	0.0191895	0.00625654	0.0643855	2559	0.00957059	0.0195955	0.625304	0.997113
Colorectal cancer	Free cholesterol in IDL	4758	0.00539298	0.014092	0.70196	0.84089	2927	0.0319746	0.0177634	0.071959	0.281996	2611	0.0424646	0.0185982	0.0224945	0.0892025	2559	0.0109266	0.0192882	0.57111	0.997113
Colorectal cancer	Total lipids in IDL	4758	0.0109422	0.0141046	0.437913	0.742788	2927	0.0371782	0.0177242	0.0360268	0.268135	2611	0.0482013	0.0187063	0.0100282	0.0643855	2559	0.0097353	0.0194544	0.616825	0.997113
Colorectal cancer	Concentration of IDL particles	4758	0.00859378	0.0140335	0.540318	0.761562	2927	0.0350633	0.0176207	0.0466961	0.281996	2611	0.046244	0.0185221	0.0125972	0.0643855	2559	0.00924539	0.019449	0.634567	0.997113
Colorectal cancer	Phospholipids in IDL	4758	0.00702341	0.0140179	0.616372	0.813082	2927	0.0306197	0.0176539	0.0829443	0.281996	2611	0.0435175	0.0183724	0.0179263	0.075539	2559	0.00892612	0.0193503	0.644628	0.997113
Colorectal cancer	Triglycerides in IDL	4758	0.00366482	0.0140346	0.794005	0.906585	2927	0.00377331	0.0172287	0.826655	0.892633	2611	0.0307351	0.0170757	0.0719871	0.186034	2559	0.0054901	0.0190305	0.772995	0.997113
Colorectal cancer	Cholesterol in large HDL	4758	-0.00337094	0.0141225	0.811354	0.906585	2927	-0.0218787	0.0176288	0.214677	0.363057	2611	-0.0292352	0.0169286	0.0842909	0.208461	2559	-0.00684776	0.0171274	0.689327	0.997113
Colorectal cancer	Cholesteryl esters in large HDL	4758	-0.00335973	0.0141237	0.811985	0.906585	2927	-0.0223296	0.0176426	0.205736	0.355784	2611	-0.030137	0.0169361	0.0752823	0.192377	2559	-0.00720155	0.0171492	0.674569	0.997113
Colorectal cancer	Free cholesterol in large HDL	4758	-0.00358655	0.01412	0.799502	0.906585	2927	-0.0194076	0.0175839	0.269807	0.411622	2611	-0.0258594	0.0169579	0.127401	0.236308	2559	-0.00606339	0.0170474	0.722112	0.997113
Colorectal cancer	Total lipids in large HDL	4758	-0.00255383	0.014102	0.856299	0.914793	2927	-0.0193723	0.0175095	0.268649	0.411622	2611	-0.0236031	0.0166021	0.155236	0.256866	2559	-0.00660829	0.0169269	0.696272	0.997113
Colorectal cancer	Concentration of large HDL particles	4758	-0.00291033	0.0140834	0.836292	0.914793	2927	-0.017729	0.0174833	0.31064	0.452197	2611	-0.0215397	0.0164601	0.190786	0.29532	2559	-0.00662941	0.0169176	0.69519	0.997113
Colorectal cancer	Phospholipids in large HDL	4758	-0.00249643	0.0140631	0.85911	0.914793	2927	-0.0182775	0.0174159	0.294046	0.44203	2611	-0.0182356	0.0162524	0.261954	0.374219	2559	-0.0071176	0.0167955	0.671761	0.997113
Colorectal cancer	Triglycerides in large HDL	4758	0.0142203	0.0142915	0.319779	0.690546	2927	0.025773	0.0177355	0.146278	0.302242	2611	0.00930392	0.0176332	0.597797	0.687818	2559	-0.00163885	0.0179114	0.927105	0.997113
Colorectal cancer	Cholesterol in large LDL	4758	0.0103475	0.0140711	0.462148	0.751821	2927	0.0338849	0.0177628	0.0565369	0.281996	2611	0.0468263	0.0186052	0.0119006	0.0643855	2559	0.0124635	0.0195925	0.524742	0.997113
Colorectal cancer	Cholesteryl esters in large LDL	4758	0.0114471	0.0140612	0.415631	0.742788	2927	0.0352194	0.0178009	0.0479638	0.281996	2611	0.0479304	0.0186254	0.0101256	0.0643855	2559	0.0123068	0.0196334	0.530825	0.997113
Colorectal cancer	Free cholesterol in large LDL	4758	0.00685238	0.0140679	0.626215	0.813082	2927	0.0291836	0.0177223	0.0997249	0.286709	2611	0.0433151	0.0184987	0.0192804	0.0791872	2559	0.0135315	0.019417	0.485934	0.997113
Colorectal cancer	Total lipids in large LDL	4758	0.0100091	0.0140004	0.474695	0.752964	2927	0.0308891	0.0176169	0.0796416	0.281996	2611	0.0457458	0.0183146	0.0125585	0.0643855	2559	0.0123487	0.0195295	0.527239	0.997113
Colorectal cancer	Concentration of large LDL particles	4758	0.00960059	0.0139632	0.491762	0.753704	2927	0.0292577	0.0175683	0.0959471	0.286709	2611	0.0450205	0.0181607	0.0132375	0.0647792	2559	0.012306	0.0195125	0.52831	0.997113
Colorectal cancer	Phospholipids in large LDL	4758	0.0115996	0.0139998	0.4074	0.742788	2927	0.0320465	0.0176899	0.0701552	0.281996	2611	0.047292	0.0183995	0.0102163	0.0643855	2559	0.0114203	0.0194713	0.557577	0.997113
Colorectal cancer	Triglycerides in large LDL	4758	0.00251464	0.0141016	0.858478	0.914793	2927	0.000377043	0.0170508	0.982359	0.986649	2611	0.0280842	0.0167525	0.0937765	0.211457	2559	0.00717158	0.0183268	0.695595	0.997113
Colorectal cancer	Cholesterol in large VLDL	4758	0.0289742	0.0140638	0.0394348	0.579836	2927	0.0279606	0.0184592	0.129951	0.293026	2611	0.0296761	0.0186706	0.112079	0.22528	2559	-0.0065356	0.0193301	0.735312	0.997113
Colorectal cancer	Cholesteryl esters in large VLDL	4758	0.0309401	0.0140377	0.0275672	0.579836	2927	0.0293591	0.018415	0.110976	0.290265	2611	0.0293344	0.01861	0.115085	0.227337	2559	-0.00434061	0.0192373	0.821503	0.997113
Colorectal cancer	Free cholesterol in large VLDL	4758	0.0260374	0.0141274	0.0653848	0.579836	2927	0.0277507	0.0185734	0.135255	0.295459	2611	0.0308811	0.0187132	0.0990156	0.220401	2559	-0.0062466	0.0188208	0.739993	0.997113
Colorectal cancer	Total lipids in large VLDL	4758	0.0277154	0.0141315	0.0499083	0.579836	2927	0.0267069	0.0184947	0.148837	0.302944	2611	0.0303127	0.0186203	0.103659	0.220401	2559	-0.0054627	0.0191877	0.775899	0.997113
Colorectal cancer	Concentration of large VLDL particles	4758	0.0274488	0.0141495	0.0524501	0.579836	2927	0.0251583	0.0184903	0.17374	0.330249	2611	0.0304564	0.0185909	0.101491	0.220401	2559	-0.00572574	0.0191876	0.765415	0.997113
Colorectal cancer	Phospholipids in large VLDL	4758	0.0267635	0.0140917	0.0575931	0.579836	2927	0.026171	0.0185343	0.158046	0.310688	2611	0.0319344	0.0186719	0.0873316	0.209224	2559	-0.0127977	0.0193789	0.509061	0.997113
Colorectal cancer	Triglycerides in large VLDL	4758	0.0273792	0.014167	0.0533443	0.579836	2927	0.0248287	0.018502	0.179717	0.331503	2611	0.0290311	0.018572	0.118136	0.229134	2559	-0.0117117	0.019208	0.542092	0.997113
Colorectal cancer	Cholesterol in medium HDL	4758	0.00822795	0.0144065	0.56794	0.772936	2927	-0.015283	0.0179827	0.395467	0.529724	2611	-0.0118934	0.0168562	0.480512	0.58786	2559	-0.0107411	0.0180533	0.551918	0.997113
Colorectal cancer	Cholesteryl esters in medium HDL	4758	0.00693047	0.0143833	0.62994	0.813082	2927	-0.0180952	0.0180623	0.316514	0.457851	2611	-0.0147534	0.0169466	0.384064	0.499066	2559	-0.0116458	0.0181418	0.520974	0.997113
Colorectal cancer	Free cholesterol in medium HDL	4758	0.0134014	0.0144764	0.354629	0.690546	2927	-0.00483238	0.0175912	0.783563	0.860486	2611	0.00124034	0.0164633	0.93995	0.956587	2559	-0.00817552	0.0177728	0.645554	0.997113
Colorectal cancer	Total lipids in medium HDL	4758	0.0135622	0.0143367	0.34421	0.690546	2927	-0.0145189	0.0175035	0.406897	0.537853	2611	-0.00464985	0.0162863	0.775279	0.842307	2559	-0.0101831	0.0178074	0.567478	0.997113
Colorectal cancer	Concentration of medium HDL particles	4758	0.0169151	0.0142884	0.236538	0.682438	2927	-0.0126278	0.0173638	0.467133	0.583917	2611	-0.00170254	0.0161747	0.916178	0.936538	2559	-0.01038	0.0177836	0.559482	0.997113
Colorectal cancer	Phospholipids in medium HDL	4758	0.0144797	0.0142279	0.308873	0.690546	2927	-0.015784	0.0173429	0.362838	0.499717	2611	-0.00220326	0.0158547	0.889488	0.928196	2559	-0.00890172	0.0175963	0.612981	0.997113
Colorectal cancer	Triglycerides in medium HDL	4758	0.0210043	0.0141731	0.138412	0.608926	2927	0.0115456	0.0178486	0.517771	0.630091	2611	0.0241982	0.0184392	0.189527	0.29532	2559	-0.0146985	0.0190525	0.440496	0.997113
Colorectal cancer	Cholesterol in medium LDL	4758	0.010114	0.0140201	0.470705	0.751821	2927	0.0340508	0.0178242	0.0561841	0.281996	2611	0.0489018	0.0186245	0.00869844	0.0643855	2559	0.0141741	0.0196858	0.47158	0.997113
Colorectal cancer	Cholesteryl esters in medium LDL	4758	0.00974013	0.0140015	0.486684	0.753704	2927	0.034053	0.0178279	0.0562182	0.281996	2611	0.0485893	0.0186048	0.00906229	0.0643855	2559	0.013911	0.0196616	0.479307	0.997113
Colorectal cancer	Free cholesterol in medium LDL	4758	0.0123004	0.0141647	0.385229	0.726252	2927	0.0332983	0.017839	0.0620578	0.281996	2611	0.0479753	0.0187712	0.0106508	0.0643855	2559	0.0147423	0.0197519	0.45551	0.997113
Colorectal cancer	Total lipids in medium LDL	4758	0.0106646	0.0139758	0.445452	0.742788	2927	0.0304239	0.017681	0.0854092	0.281996	2611	0.0475994	0.0183391	0.00949777	0.0643855	2559	0.0139116	0.0196811	0.479723	0.997113
Colorectal cancer	Concentration of medium LDL particles	4758	0.0107738	0.0139784	0.440897	0.742788	2927	0.0285836	0.0176388	0.105234	0.288142	2611	0.0465999	0.0181558	0.0103237	0.0643855	2559	0.0137389	0.0196582	0.484686	0.997113
Colorectal cancer	Phospholipids in medium LDL	4758	0.0175096	0.0140169	0.211662	0.682438	2927	0.03184	0.0176908	0.0719955	0.281996	2611	0.048916	0.0183175	0.007622	0.0643855	2559	0.0127703	0.019611	0.514989	0.997113
Colorectal cancer	Triglycerides in medium LDL	4758	0.00256444	0.0141141	0.855831	0.914793	2927	-0.00751071	0.0169569	0.657849	0.756527	2611	0.0254269	0.0162847	0.118552	0.229134	2559	0.00784235	0.0178876	0.661116	0.997113
Colorectal cancer	Cholesterol in medium VLDL	4758	0.0317586	0.0140296	0.0236384	0.579836	2927	0.0356336	0.0183778	0.0526032	0.281996	2611	0.0365908	0.0186611	0.0500081	0.153338	2559	-0.00858174	0.0194136	0.658492	0.997113
Colorectal cancer	Cholesteryl esters in medium VLDL	4758	0.0319466	0.0140863	0.0233784	0.579836	2927	0.0391893	0.0182532	0.0318771	0.256995	2611	0.0365886	0.0186832	0.0502937	0.153338	2559	-0.00782713	0.0195019	0.688194	0.997113
Colorectal cancer	Free cholesterol in medium VLDL	4758	0.027549	0.0140726	0.0503316	0.579836	2927	0.0297691	0.0185457	0.108562	0.290265	2611	0.0350424	0.018599	0.0596627	0.170726	2559	-0.00804473	0.0191955	0.675183	0.997113
Colorectal cancer	Total lipids in medium VLDL	4758	0.0292654	0.014097	0.0379475	0.579836	2927	0.0302774	0.0185056	0.101921	0.287611	2611	0.0352058	0.0185643	0.058015	0.170726	2559	-0.00804661	0.0190924	0.673457	0.997113
Colorectal cancer	Concentration of medium VLDL particles	4758	0.0280549	0.0141181	0.0469614	0.579836	2927	0.0292718	0.0185378	0.114437	0.290265	2611	0.0347789	0.0184926	0.0601252	0.170726	2559	-0.00776911	0.0190321	0.683153	0.997113
Colorectal cancer	Phospholipids in medium VLDL	4758	0.0278257	0.0140739	0.0480863	0.579836	2927	0.0315107	0.0185191	0.0889515	0.281996	2611	0.0370837	0.0186279	0.046611	0.148292	2559	-0.00812461	0.0191656	0.671662	0.997113
Colorectal cancer	Triglycerides in medium VLDL	4758	0.0273149	0.0141554	0.0537104	0.579836	2927	0.0261597	0.0184259	0.155794	0.310085	2611	0.0313581	0.0183875	0.0882378	0.209224	2559	-0.00775887	0.0188633	0.680872	0.997113
Colorectal cancer	Cholesterol in small HDL	4758	0.00895873	0.0142416	0.529344	0.761562	2927	-0.029869	0.0171464	0.0816136	0.281996	2611	0.0144752	0.0154156	0.34782	0.459762	2559	-0.00152114	0.0191102	0.936563	0.997113
Colorectal cancer	Cholesteryl esters in small HDL	4758	0.00690645	0.0142001	0.626731	0.813082	2927	-0.029248	0.016965	0.0848111	0.281996	2611	0.0188428	0.0153503	0.219738	0.332498	2559	0.000722909	0.0192257	0.970009	0.997113
Colorectal cancer	Free cholesterol in small HDL	4758	0.0132463	0.0142261	0.351834	0.690546	2927	-0.0174595	0.0181133	0.335173	0.478818	2611	-0.00912174	0.0173024	0.598102	0.687818	2559	-0.0139941	0.0190355	0.462312	0.997113
Colorectal cancer	Total lipids in small HDL	4758	0.0135408	0.014376	0.346289	0.690546	2927	-0.0251151	0.0176701	0.155326	0.310085	2611	0.00915262	0.0167106	0.583934	0.683591	2559	-0.010281	0.0189915	0.588317	0.997113
Colorectal cancer	Concentration of small HDL particles	4758	0.00973091	0.014461	0.501039	0.753704	2927	-0.0184578	0.0177273	0.297865	0.444035	2611	0.00860235	0.0174783	0.622638	0.702175	2559	-0.0103156	0.0190052	0.58733	0.997113
Colorectal cancer	Phospholipids in small HDL	4758	0.0099171	0.0143897	0.490743	0.753704	2927	-0.0144004	0.0177274	0.416672	0.540757	2611	0.000361233	0.0178824	0.983885	0.988181	2559	-0.0178194	0.0189884	0.34811	0.997113
Colorectal cancer	Triglycerides in small HDL	4758	0.0122528	0.014315	0.392074	0.733146	2927	7.44751e-05	0.0186762	0.996819	0.996819	2611	0.0299395	0.0183476	0.102843	0.220401	2559	-0.00110111	0.0192552	0.954402	0.997113
Colorectal cancer	Cholesterol in small LDL	4758	0.00928107	0.0140269	0.508218	0.754131	2927	0.0340521	0.0179328	0.0576792	0.281996	2611	0.0484397	0.018736	0.00978112	0.0643855	2559	0.0140685	0.019735	0.475991	0.997113
Colorectal cancer	Cholesteryl esters in small LDL	4758	0.00836816	0.0140134	0.550433	0.761562	2927	0.032747	0.0179033	0.0674856	0.281996	2611	0.0478481	0.0186315	0.0102803	0.0643855	2559	0.0145559	0.0197153	0.460395	0.997113
Colorectal cancer	Free cholesterol in small LDL	4758	0.0156098	0.0144398	0.279738	0.690546	2927	0.0373742	0.0180002	0.0379511	0.268135	2611	0.0513652	0.0191568	0.00737978	0.0643855	2559	0.0124984	0.0198465	0.528911	0.997113
Colorectal cancer	Total lipids in small LDL	4758	0.0108369	0.0139941	0.438739	0.742788	2927	0.0323068	0.0178384	0.0702314	0.281996	2611	0.0480126	0.0185275	0.00961119	0.0643855	2559	0.0133963	0.019732	0.497255	0.997113
Colorectal cancer	Concentration of small LDL particles	4758	0.0112797	0.0140148	0.420948	0.742788	2927	0.0304754	0.0178116	0.0871894	0.281996	2611	0.046107	0.0183381	0.0119875	0.0643855	2559	0.013226	0.0197193	0.502464	0.997113
Colorectal cancer	Phospholipids in small LDL	4758	0.0162626	0.0140163	0.245999	0.682438	2927	0.0331557	0.0179107	0.0642453	0.281996	2611	0.0465833	0.0184657	0.0117053	0.0643855	2559	0.0104404	0.0196606	0.595444	0.997113
Colorectal cancer	Triglycerides in small LDL	4758	0.0105312	0.0140444	0.453383	0.744843	2927	0.00316855	0.0175351	0.856618	0.915821	2611	0.031029	0.0171395	0.070352	0.183875	2559	0.00436487	0.0189801	0.818133	0.997113
Colorectal cancer	Cholesterol in small VLDL	4758	0.0171653	0.0140728	0.222622	0.682438	2927	0.0491123	0.0182977	0.00731423	0.136204	2611	0.0528186	0.018922	0.00528646	0.0643855	2559	0.00137341	0.0192966	0.943265	0.997113
Colorectal cancer	Cholesteryl esters in small VLDL	4758	0.013067	0.0141933	0.357283	0.690546	2927	0.0539507	0.0183269	0.00326761	0.0939437	2611	0.0542173	0.0190393	0.00443887	0.0643855	2559	0.000626024	0.0193873	0.974243	0.997113
Colorectal cancer	Free cholesterol in small VLDL	4758	0.0220596	0.01398	0.114646	0.583528	2927	0.0349306	0.0183633	0.0572434	0.281996	2611	0.0441019	0.0186414	0.0180637	0.075539	2559	0.00257955	0.0191502	0.892859	0.997113
Colorectal cancer	Total lipids in small VLDL	4758	0.0219872	0.0140132	0.116706	0.583528	2927	0.0357748	0.0184777	0.0529513	0.281996	2611	0.0452794	0.0187259	0.0156741	0.0693276	2559	-0.000175766	0.0190576	0.992642	0.997113
Colorectal cancer	Concentration of small VLDL particles	4758	0.0225317	0.0140366	0.108514	0.583528	2927	0.0304979	0.0185159	0.0996409	0.286709	2611	0.0400864	0.0186152	0.0313766	0.111025	2559	-0.000746305	0.0190038	0.968677	0.997113
Colorectal cancer	Phospholipids in small VLDL	4758	0.0214133	0.0139913	0.125967	0.595821	2927	0.0278837	0.0183708	0.129166	0.293026	2611	0.0397839	0.0185901	0.0324426	0.113058	2559	0.00210178	0.0190673	0.912236	0.997113
Colorectal cancer	Triglycerides in small VLDL	4758	0.0236891	0.0141409	0.0939555	0.583528	2927	0.0218324	0.0186732	0.242423	0.389912	2611	0.0339516	0.0186248	0.0684295	0.180906	2559	-0.00185644	0.0188565	0.921582	0.997113
Colorectal cancer	Cholesterol in very large HDL	4758	-0.00830817	0.0137597	0.546003	0.761562	2927	0.00313137	0.0177623	0.860076	0.915821	2611	-0.0114027	0.0184036	0.535583	0.641584	2559	0.00357826	0.0179277	0.841814	0.997113
Colorectal cancer	Cholesteryl esters in very large HDL	4758	-0.00897261	0.0137535	0.514183	0.75619	2927	0.0062144	0.017752	0.726314	0.815811	2611	-0.00795421	0.0185603	0.668279	0.749777	2559	0.0040046	0.0180073	0.82403	0.997113
Colorectal cancer	Free cholesterol in very large HDL	4758	-0.00507756	0.0138724	0.714367	0.851319	2927	-0.00505567	0.017687	0.77502	0.860486	2611	-0.0208375	0.0179449	0.245671	0.357623	2559	-0.00217981	0.0178513	0.902822	0.997113
Colorectal cancer	Total lipids in very large HDL	4758	-0.00659536	0.0138934	0.635015	0.813082	2927	-0.00493568	0.0176731	0.780052	0.860486	2611	-0.0171022	0.0178349	0.337691	0.451979	2559	-0.000377676	0.0177484	0.983024	0.997113
Colorectal cancer	Concentration of very large HDL particles	4758	-0.00627391	0.0139758	0.653514	0.813082	2927	-0.00696359	0.0175817	0.692082	0.788015	2611	-0.0183215	0.0175442	0.29644	0.408271	2559	-0.000496789	0.0177663	0.977694	0.997113
Colorectal cancer	Phospholipids in very large HDL	4758	-0.00621578	0.0140365	0.657909	0.813544	2927	-0.0140375	0.0175293	0.423312	0.541787	2611	-0.022979	0.017159	0.180631	0.286518	2559	-0.00500348	0.0178503	0.779268	0.997113
Colorectal cancer	Triglycerides in very large HDL	4758	0.0146401	0.014388	0.308957	0.690546	2927	0.0283187	0.0182047	0.119918	0.290265	2611	0.0154087	0.0185896	0.407242	0.52113	2559	0.00366432	0.0193626	0.849914	0.997113
Colorectal cancer	Cholesterol in very large VLDL	4758	0.0253809	0.0140794	0.0715005	0.579836	2927	0.031488	0.018609	0.0907366	0.281996	2611	0.0308051	0.0189662	0.104451	0.220401	2559	-0.0119346	0.0188703	0.527147	0.997113
Colorectal cancer	Cholesteryl esters in very large VLDL	4758	0.0275025	0.0140611	0.0505324	0.579836	2927	0.0330242	0.0185637	0.075348	0.281996	2611	0.0302143	0.0188419	0.10893	0.22528	2559	-0.012106	0.0188376	0.520511	0.997113
Colorectal cancer	Free cholesterol in very large VLDL	4758	0.0237527	0.0140918	0.0919448	0.583528	2927	0.0302233	0.0185732	0.10379	0.287611	2611	0.0297064	0.019193	0.121799	0.230304	2559	-0.0173261	0.0189894	0.361639	0.997113
Colorectal cancer	Total lipids in very large VLDL	4758	0.0246775	0.0141095	0.0803546	0.579836	2927	0.0277028	0.0186125	0.136754	0.295459	2611	0.0289509	0.0188545	0.124786	0.23334	2559	-0.0031948	0.0191724	0.86767	0.997113
Colorectal cancer	Concentration of very large VLDL particles	4758	0.0245969	0.0141528	0.0822843	0.579836	2927	0.0273091	0.0185562	0.14121	0.297965	2611	0.029325	0.0188871	0.12063	0.230304	2559	-0.00337121	0.0191922	0.860579	0.997113
Colorectal cancer	Phospholipids in very large VLDL	4758	0.0235494	0.0141135	0.0952672	0.583528	2927	0.0294384	0.0185347	0.112331	0.290265	2611	0.029438	0.0190381	0.122161	0.230304	2559	-0.0197296	0.0194364	0.310161	0.997113
Colorectal cancer	Triglycerides in very large VLDL	4758	0.0245871	0.0141892	0.0831939	0.579836	2927	0.027067	0.0185619	0.144891	0.302242	2611	0.0283072	0.0187612	0.131467	0.240413	2559	-0.0155632	0.0194052	0.422622	0.997113
Colorectal cancer	Cholesterol in very small VLDL	4758	0.00910412	0.0145797	0.532371	0.761562	2927	0.0570997	0.0183422	0.00186968	0.091679	2611	0.0548975	0.0192463	0.00437361	0.0643855	2559	0.00775569	0.0196072	0.692468	0.997113
Colorectal cancer	Cholesteryl esters in very small VLDL	4758	0.00395484	0.0146652	0.787422	0.906585	2927	0.0593023	0.018479	0.0013456	0.091679	2611	0.0507484	0.0190816	0.00787266	0.0643855	2559	0.00712337	0.0195709	0.715905	0.997113
Colorectal cancer	Free cholesterol in very small VLDL	4758	0.0178397	0.0144058	0.21564	0.682438	2927	0.0474172	0.0180074	0.00850283	0.136204	2611	0.0521281	0.0190837	0.00634607	0.0643855	2559	0.0100998	0.0195692	0.605826	0.997113
Colorectal cancer	Total lipids in very small VLDL	4758	0.0151065	0.0142335	0.288592	0.690546	2927	0.048985	0.0180176	0.00659191	0.136204	2611	0.057467	0.0190957	0.0026426	0.0643855	2559	0.0062692	0.0196144	0.749281	0.997113
Colorectal cancer	Concentration of very small VLDL particles	4758	0.0180605	0.0140472	0.198609	0.682438	2927	0.0380352	0.0176522	0.0312668	0.256995	2611	0.0497594	0.018562	0.00739293	0.0643855	2559	0.00589932	0.0196167	0.763645	0.997113
Colorectal cancer	Phospholipids in very small VLDL	4758	0.0159452	0.014004	0.25492	0.682438	2927	0.0376222	0.0175771	0.0324038	0.256995	2611	0.0522686	0.0186236	0.00504436	0.0643855	2559	0.00540746	0.0194685	0.781223	0.997113
Colorectal cancer	Triglycerides in very small VLDL	4758	0.0157626	0.0140432	0.261734	0.682438	2927	0.0153201	0.0183472	0.40378	0.536818	2611	0.037145	0.0182949	0.0424223	0.137424	2559	0.00322199	0.0194494	0.868438	0.997113
Colorectal cancer	Diacylglycerol	4665	0.00742045	0.0140938	0.598562	0.805083	2823	0.0281501	0.0187915	0.134241	0.295459	2544	0.0500203	0.019094	0.00885363	0.0643855
Colorectal cancer	Phosphatidylcholines	4735	0.0228078	0.0141753	0.107688	0.583528	2881	0.0270632	0.0174755	0.121579	0.290265	2579	0.026945	0.0169788	0.11264	0.22528	2558	-0.00197384	0.018503	0.915053	0.997113
Colorectal cancer	Sphingomyelins	4691	0.0137114	0.0141846	0.333773	0.690546	2923	0.0128698	0.0171069	0.451919	0.567986	2433	0.0419172	0.0174717	0.0165084	0.0716404
Colorectal cancer	Ratio of triglycerides to phosphoglycerides	4753	0.0178811	0.0142318	0.209028	0.682438	2923	0.0340556	0.018635	0.0677249	0.281996	2600	0.0151273	0.0182733	0.407841	0.52113	2555	-0.0120604	0.0187411	0.51994	0.997113
Colorectal cancer	Total cholines	4754	0.0186678	0.0142146	0.189152	0.682438	2918	0.00910137	0.0171428	0.595518	0.698822	2602	0.0285467	0.0168844	0.091011	0.209325	2558	0.00120081	0.0182496	0.947543	0.997113
Colorectal cancer	Phosphoglycerides	4753	0.0148092	0.0141582	0.295624	0.690546	2924	0.00335642	0.0170551	0.843999	0.907102	2601	0.0230582	0.0170042	0.17521	0.280128	2558	0.0055391	0.0181597	0.760375	0.997113
Colorectal cancer	Cholesterol to total lipids ratio in chylomicrons and extremely large VLDL	4758	0.0322626	0.0137496	0.0189944	0.579836	2927	0.0115933	0.0182447	0.525193	0.63576	2611	0.00548854	0.0193218	0.776387	0.842307	2559	-0.00900806	0.0193937	0.64234	0.997113
Colorectal cancer	Cholesteryl esters to total lipids ratio in chylomicrons and extremely large VLDL	4758	0.0298606	0.0139639	0.0325342	0.579836	2927	0.0174642	0.0182764	0.339374	0.481828	2611	-0.000786782	0.0194495	0.967735	0.980525	2559	-0.00850635	0.0193881	0.660887	0.997113
Colorectal cancer	Free cholesterol to total lipids ratio in chylomicrons and extremely large VLDL	4758	0.0151355	0.0142514	0.288273	0.690546	2927	0.00492398	0.0181046	0.785661	0.860486	2611	0.00962703	0.0188083	0.608799	0.694559	2559	-0.0217219	0.0195024	0.265468	0.997113
Colorectal cancer	Phospholipids to total lipids ratio in chylomicrons and extremely large VLDL	4758	-0.0215088	0.0139586	0.123408	0.595821	2927	-0.0017785	0.0181748	0.922054	0.946752	2611	0.0108871	0.0183518	0.553067	0.659096	2559	-0.0108332	0.0192018	0.572683	0.997113
Colorectal cancer	Triglycerides to total lipids ratio in chylomicrons and extremely large VLDL	4758	-0.0258455	0.0137949	0.0610526	0.579836	2927	-0.0166664	0.0179266	0.352601	0.491505	2611	-0.00326462	0.0186087	0.860751	0.906296	2559	0.00511021	0.0191111	0.789187	0.997113
Colorectal cancer	Cholesterol to total lipids ratio in IDL	4758	0.00963494	0.0148392	0.516182	0.75619	2927	0.055953	0.0184681	0.00246928	0.0939437	2611	0.027934	0.0185253	0.131705	0.240413	2559	0.0091978	0.0197612	0.64165	0.997113
Colorectal cancer	Cholesteryl esters to total lipids ratio in IDL	4758	0.01456	0.0146616	0.320725	0.690546	2927	0.056607	0.0178707	0.00155298	0.091679	2611	0.0247299	0.0171882	0.150335	0.256708	2559	0.00467379	0.0196038	0.81158	0.997113
Colorectal cancer	Free cholesterol to total lipids ratio in IDL	4758	-0.0208873	0.0141105	0.138869	0.608926	2927	0.00441542	0.0183154	0.809513	0.878245	2611	0.00227989	0.0183365	0.901059	0.933529	2559	0.0155776	0.0185868	0.402054	0.997113
Colorectal cancer	Phospholipids to total lipids ratio in IDL	4758	-0.0137828	0.0143497	0.336856	0.690546	2927	-0.0605499	0.0181351	0.000851911	0.091679	2611	-0.0402691	0.0178799	0.0243925	0.0950893	2559	-0.00835374	0.0197286	0.672016	0.997113
Colorectal cancer	Triglycerides to total lipids ratio in IDL	4758	-0.00619792	0.0147324	0.673993	0.828975	2927	-0.0446945	0.018874	0.0179471	0.191843	2611	-0.0180968	0.0188843	0.338002	0.451979	2559	-0.00441358	0.0193861	0.819923	0.997113
Colorectal cancer	Cholesterol to total lipids ratio in large HDL	4758	-0.00852487	0.0141946	0.548155	0.761562	2927	-0.0202496	0.0180605	0.262289	0.407611	2611	-0.0497606	0.0189343	0.00863754	0.0643855	2559	-0.00459654	0.0183566	0.802296	0.997113
Colorectal cancer	Cholesteryl esters to total lipids ratio in large HDL	4758	-0.0084188	0.0141881	0.55296	0.761562	2927	-0.0253577	0.0181749	0.163061	0.315159	2611	-0.055944	0.0189569	0.00319446	0.0643855	2559	-0.0044645	0.0189321	0.813594	0.997113
Colorectal cancer	Free cholesterol to total lipids ratio in large HDL	4758	-0.0066825	0.0142407	0.638909	0.813082	2927	-0.00248989	0.0178302	0.888951	0.924405	2611	-0.0197539	0.0191091	0.301352	0.412566	2559	-0.000725291	0.0177469	0.967404	0.997113
Colorectal cancer	Phospholipids to total lipids ratio in large HDL	4758	0.00637424	0.0142206	0.654	0.813082	2927	0.0108438	0.017732	0.540889	0.651332	2611	0.0497225	0.0188127	0.00826609	0.0643855	2559	0.00191232	0.0185103	0.917724	0.997113
Colorectal cancer	Triglycerides to total lipids ratio in large HDL	4758	0.0142344	0.014171	0.3152	0.690546	2927	0.0414188	0.0186319	0.0262915	0.256995	2611	0.0337799	0.0183166	0.0652645	0.177686	2559	0.00104638	0.019691	0.957624	0.997113
Colorectal cancer	Cholesterol to total lipids ratio in large LDL	4758	0.0110893	0.014643	0.448903	0.742788	2927	0.0495164	0.0186925	0.00811633	0.136204	2611	0.0433223	0.0199006	0.0295745	0.106283	2559	0.0132413	0.0194703	0.496517	0.997113
Colorectal cancer	Cholesteryl esters to total lipids ratio in large LDL	4758	0.0188534	0.014463	0.192447	0.682438	2927	0.0501092	0.0183954	0.00648775	0.136204	2611	0.0515615	0.0195373	0.0083613	0.0643855	2559	0.0106783	0.0195357	0.584698	0.997113
Colorectal cancer	Free cholesterol to total lipids ratio in large LDL	4758	-0.0185835	0.0139485	0.182827	0.682438	2927	-0.0211634	0.0180725	0.241683	0.389912	2611	-0.0356166	0.0182165	0.0506682	0.153338	2559	0.00249179	0.0193098	0.897334	0.997113
Colorectal cancer	Phospholipids to total lipids ratio in large LDL	4758	-0.00467173	0.014038	0.739306	0.876497	2927	-0.0268031	0.0174365	0.124357	0.290265	2611	-0.0401254	0.0182258	0.027783	0.103344	2559	-0.0169258	0.019704	0.390421	0.997113
Colorectal cancer	Triglycerides to total lipids ratio in large LDL	4758	-0.00881593	0.0146837	0.548275	0.761562	2927	-0.0442665	0.0187586	0.0183502	0.191843	2611	-0.0207208	0.0187547	0.269334	0.382388	2559	-0.00430352	0.0184742	0.815821	0.997113
Colorectal cancer	Cholesterol to total lipids ratio in large VLDL	4758	0.0185845	0.0140066	0.184623	0.682438	2927	0.0228762	0.0179495	0.202597	0.355705	2611	0.0150777	0.0189709	0.426813	0.542359	2559	0.00103269	0.0194985	0.957766	0.997113
Colorectal cancer	Cholesteryl esters to total lipids ratio in large VLDL	4758	0.00409481	0.0142707	0.774172	0.903856	2927	0.0108607	0.0179771	0.545796	0.653818	2611	-0.000427284	0.0190332	0.982091	0.988181	2559	0.0237683	0.0197227	0.228267	0.997113
Colorectal cancer	Free cholesterol to total lipids ratio in large VLDL	4758	0.0171952	0.0141904	0.22567	0.682438	2927	0.0264317	0.0182293	0.147179	0.302242	2611	0.0342747	0.0187204	0.0672328	0.179809	2559	-0.00161146	0.0189094	0.932093	0.997113
Colorectal cancer	Phospholipids to total lipids ratio in large VLDL	4758	0.015517	0.0139581	0.266329	0.682438	2927	0.0197722	0.018112	0.275071	0.416226	2611	0.0367091	0.018478	0.0470667	0.148292	2559	-0.0170522	0.0196129	0.384688	0.997113
Colorectal cancer	Triglycerides to total lipids ratio in large VLDL	4758	-0.0184328	0.0139682	0.187026	0.682438	2927	-0.0250323	0.0178643	0.161246	0.314293	2611	-0.0314171	0.018678	0.0926814	0.211057	2559	0.00706315	0.0197226	0.72028	0.997113
Colorectal cancer	Cholesterol to total lipids ratio in medium HDL	4758	-0.0163238	0.0140876	0.246621	0.682438	2927	0.0024495	0.0180818	0.892252	0.924405	2611	-0.0177991	0.0176345	0.312909	0.423348	2559	-0.003347	0.019219	0.861761	0.997113
Colorectal cancer	Cholesteryl esters to total lipids ratio in medium HDL	4758	-0.0191951	0.0140669	0.172458	0.682438	2927	-0.00468106	0.0180005	0.794842	0.866416	2611	-0.0253921	0.0174219	0.145104	0.252859	2559	-0.00263251	0.0190761	0.890251	0.997113
Colorectal cancer	Free cholesterol to total lipids ratio in medium HDL	4758	0.00460741	0.0147092	0.754117	0.884933	2927	0.0404312	0.0186785	0.0305002	0.256995	2611	0.0276694	0.0192856	0.151488	0.256708	2559	-0.000250725	0.0178334	0.988784	0.997113
Colorectal cancer	Phospholipids to total lipids ratio in medium HDL	4758	0.00850792	0.0141557	0.547853	0.761562	2927	-0.0168376	0.0178609	0.34591	0.488094	2611	0.00675343	0.0172256	0.695048	0.776024	2559	0.0114651	0.0187637	0.541238	0.997113
Colorectal cancer	Triglycerides to total lipids ratio in medium HDL	4758	0.0147616	0.0141543	0.297046	0.690546	2927	0.0172514	0.0183958	0.348429	0.48865	2611	0.0281923	0.0189447	0.136836	0.243972	2559	-0.00470186	0.0190583	0.805153	0.997113
Colorectal cancer	Cholesterol to total lipids ratio in medium LDL	4758	0.00450403	0.014364	0.753867	0.884933	2927	0.0478108	0.0186469	0.0103967	0.140662	2611	0.0486599	0.0198502	0.0142972	0.0666771	2559	0.0153291	0.0194437	0.430544	0.997113
Colorectal cancer	Cholesteryl esters to total lipids ratio in medium LDL	4758	0.0064234	0.0140788	0.648234	0.813082	2927	0.0396781	0.0181656	0.0290236	0.256995	2611	0.0495015	0.019112	0.00964887	0.0643855	2559	0.0147762	0.0195583	0.450022	0.997113
Colorectal cancer	Free cholesterol to total lipids ratio in medium LDL	4758	-0.0112317	0.0140168	0.422998	0.742788	2927	-0.0259708	0.0174799	0.137453	0.295459	2611	-0.0447224	0.0179003	0.0125361	0.0643855	2559	-0.00864677	0.0196979	0.660721	0.997113
Colorectal cancer	Phospholipids to total lipids ratio in medium LDL	4758	0.000135113	0.0140583	0.992332	0.998372	2927	-0.0250112	0.0176424	0.15639	0.310085	2611	-0.0427902	0.0185439	0.0211048	0.0851599	2559	-0.0181989	0.0196411	0.354237	0.997113
Colorectal cancer	Triglycerides to total lipids ratio in medium LDL	4758	-0.00663822	0.0145716	0.648729	0.813082	2927	-0.0439882	0.0179035	0.0140693	0.174472	2611	-0.0111426	0.0171932	0.516992	0.622555	2559	-0.00616612	0.0182103	0.734934	0.997113
Colorectal cancer	Cholesterol to total lipids ratio in medium VLDL	4758	0.0108235	0.0141368	0.443937	0.742788	2927	0.0236173	0.0174985	0.177225	0.33144	2611	0.0233277	0.0182829	0.202093	0.309876	2559	0.00209508	0.0192017	0.913125	0.997113
Colorectal cancer	Cholesteryl esters to total lipids ratio in medium VLDL	4758	0.00577702	0.0142888	0.686007	0.839263	2927	0.0231234	0.0177944	0.193881	0.351124	2611	0.0176476	0.0185766	0.342204	0.454954	2559	0.00077404	0.0190249	0.96755	0.997113
Colorectal cancer	Free cholesterol to total lipids ratio in medium VLDL	4758	0.00953314	0.0140297	0.496856	0.753704	2927	0.0143285	0.0179195	0.424007	0.541787	2611	0.030079	0.0177413	0.0901134	0.209325	2559	-0.00400261	0.0195253	0.837591	0.997113
Colorectal cancer	Phospholipids to total lipids ratio in medium VLDL	4758	-0.0265908	0.0140802	0.0590173	0.579836	2927	-0.00239994	0.0170642	0.888163	0.924405	2611	0.0128312	0.0167026	0.442429	0.556058	2559	0.0186223	0.0179477	0.299559	0.997113
Colorectal cancer	Triglycerides to total lipids ratio in medium VLDL	4758	-0.00730889	0.0141812	0.606302	0.810752	2927	-0.0205502	0.0172919	0.234761	0.385679	2611	-0.0218734	0.0179944	0.224259	0.337122	2559	0.000283385	0.0189289	0.988056	0.997113
Colorectal cancer	Cholesterol to total lipids ratio in small HDL	4758	0.00267492	0.0141614	0.850188	0.914793	2927	-0.0215389	0.0169873	0.20492	0.355784	2611	0.0117255	0.0164074	0.474892	0.587232	2559	0.0149121	0.0194896	0.444265	0.997113
Colorectal cancer	Cholesteryl esters to total lipids ratio in small HDL	4758	0.00223781	0.0141068	0.873965	0.917862	2927	-0.0216241	0.0168695	0.199997	0.353842	2611	0.0179642	0.0164826	0.27586	0.389251	2559	0.0147493	0.0195203	0.449965	0.997113
Colorectal cancer	Free cholesterol to total lipids ratio in small HDL	4758	0.00368247	0.0138473	0.790301	0.906585	2927	0.0120001	0.0175968	0.495326	0.6125	2611	-0.0499032	0.0182017	0.00615448	0.0643855	2559	-0.0107784	0.0192836	0.57625	0.997113
Colorectal cancer	Phospholipids to total lipids ratio in small HDL	4758	-0.00640396	0.0140195	0.647844	0.813082	2927	0.0194218	0.0165725	0.241322	0.389912	2611	-0.0214821	0.0163428	0.188803	0.29532	2559	-0.0186552	0.0196188	0.341754	0.997113
Colorectal cancer	Triglycerides to total lipids ratio in small HDL	4758	0.00868361	0.0143589	0.54537	0.761562	2927	0.013282	0.0191992	0.489117	0.608092	2611	0.0279671	0.0187232	0.135371	0.243245	2559	0.0017719	0.0191456	0.926269	0.997113
Colorectal cancer	Cholesterol to total lipids ratio in small LDL	4758	0.00141464	0.0142484	0.920917	0.949824	2927	0.0384074	0.0185477	0.0384715	0.268135	2611	0.0475234	0.0196011	0.0153961	0.0693276	2559	0.0184798	0.0195731	0.345186	0.997113
Colorectal cancer	Cholesteryl esters to total lipids ratio in small LDL	4758	0.00278053	0.0140781	0.843439	0.914793	2927	0.0332417	0.0180326	0.0653687	0.281996	2611	0.0467775	0.0189584	0.0136747	0.0655247	2559	0.0173044	0.0197097	0.380047	0.997113
Colorectal cancer	Free cholesterol to total lipids ratio in small LDL	4758	-0.0101939	0.0140971	0.469642	0.751821	2927	-0.0214763	0.0174694	0.219033	0.365055	2611	-0.0432068	0.0176614	0.014495	0.0666771	2559	-0.00903479	0.0197074	0.646671	0.997113
Colorectal cancer	Phospholipids to total lipids ratio in small LDL	4758	-0.00125507	0.014049	0.928819	0.953698	2927	-0.0282061	0.0178188	0.113543	0.290265	2611	-0.0467545	0.018793	0.0129131	0.0645654	2559	-0.0194643	0.0197834	0.325273	0.997113
Colorectal cancer	Triglycerides to total lipids ratio in small LDL	4758	0.00341675	0.0142765	0.810863	0.906585	2927	-0.030229	0.0182383	0.0975379	0.286709	2611	-0.00243255	0.0178936	0.891875	0.928196	2559	-0.0103365	0.018995	0.586373	0.997113
Colorectal cancer	Cholesterol to total lipids ratio in small VLDL	4758	-0.0127401	0.0146562	0.384747	0.726252	2927	0.0350987	0.0187855	0.0618078	0.281996	2611	0.0249557	0.0190934	0.191316	0.29532	2559	0.0040208	0.0193479	0.83539	0.997113
Colorectal cancer	Cholesteryl esters to total lipids ratio in small VLDL	4758	-0.0129638	0.0146578	0.376507	0.721638	2927	0.0393993	0.0188797	0.036987	0.268135	2611	0.027173	0.01905	0.153871	0.256866	2559	0.000405227	0.0195618	0.983474	0.997113
Colorectal cancer	Free cholesterol to total lipids ratio in small VLDL	4758	-0.00961578	0.0142998	0.501335	0.753704	2927	-0.015248	0.0174607	0.382585	0.520678	2611	-0.00985159	0.0169333	0.560759	0.664817	2559	0.0147958	0.0183203	0.419386	0.997113
Colorectal cancer	Phospholipids to total lipids ratio in small VLDL	4758	-0.0175415	0.0141869	0.21635	0.682438	2927	-0.0571218	0.0184617	0.00199302	0.091679	2611	-0.0453637	0.0181615	0.0125583	0.0643855	2559	0.00461549	0.0187622	0.805703	0.997113
Colorectal cancer	Triglycerides to total lipids ratio in small VLDL	4758	0.0178707	0.0145795	0.220355	0.682438	2927	-0.0159762	0.0188253	0.396141	0.529724	2611	-0.0106408	0.018809	0.571629	0.674229	2559	-0.0128423	0.0187374	0.493163	0.997113
Colorectal cancer	Ratio of diacylglycerol to triglycerides	4665	-0.00118122	0.0143833	0.934551	0.955319	2822	0.0162117	0.0187464	0.387229	0.523898	2544	0.0499346	0.019151	0.00917637	0.0643855
Colorectal cancer	Cholesterol to total lipids ratio in very large HDL	4758	0.00172492	0.0142896	0.903925	0.940736	2927	0.0292506	0.0169898	0.0852385	0.281996	2611	0.0226847	0.0167356	0.175385	0.280128	2559	0.0201149	0.0199643	0.31377	0.997113
Colorectal cancer	Cholesteryl esters to total lipids ratio in very large HDL	4758	0.00102307	0.0143295	0.943086	0.959777	2927	0.02876	0.0170609	0.0919551	0.281996	2611	0.0238336	0.0168702	0.157844	0.258809	2559	0.0175383	0.0191568	0.36001	0.997113
Colorectal cancer	Free cholesterol to total lipids ratio in very large HDL	4758	0.0112784	0.0140513	0.422212	0.742788	2927	0.0012177	0.0183609	0.947127	0.959644	2611	-0.0354444	0.0190733	0.0632352	0.17523	2559	0.00323788	0.0183687	0.860095	0.997113
Colorectal cancer	Phospholipids to total lipids ratio in very large HDL	4758	-0.00548079	0.0142558	0.700655	0.84089	2927	-0.0370613	0.0172701	0.0319569	0.256995	2611	-0.0272114	0.0167461	0.104296	0.220401	2559	-0.0129303	0.0198666	0.515199	0.997113
Colorectal cancer	Triglycerides to total lipids ratio in very large HDL	4758	0.023167	0.014251	0.104091	0.583528	2927	0.0326446	0.0189255	0.084651	0.281996	2611	0.0262519	0.0187316	0.161191	0.261083	2559	-0.0142071	0.019294	0.461586	0.997113
Colorectal cancer	Cholesterol to total lipids ratio in very large VLDL	4758	-0.0147271	0.0146235	0.313945	0.690546	2927	0.0221076	0.0184473	0.230852	0.381986	2611	0.00618597	0.0193325	0.749011	0.82427	2559	0.00780436	0.0194505	0.688276	0.997113
Colorectal cancer	Cholesteryl esters to total lipids ratio in very large VLDL	4758	-0.0114382	0.0145383	0.431462	0.742788	2927	0.0237275	0.0183802	0.19683	0.353679	2611	-0.00653888	0.0192623	0.734287	0.811952	2559	0.0113652	0.0194162	0.558369	0.997113
Colorectal cancer	Free cholesterol to total lipids ratio in very large VLDL	4758	-0.0153677	0.0144564	0.28782	0.690546	2927	0.0164359	0.0179869	0.360914	0.499717	2611	0.00988304	0.018592	0.595066	0.687818	2559	-0.0028404	0.0194234	0.883747	0.997113
Colorectal cancer	Phospholipids to total lipids ratio in very large VLDL	4758	0.0135876	0.0140241	0.332656	0.690546	2927	0.0276307	0.0180027	0.12494	0.290265	2611	0.0395076	0.0186159	0.0339103	0.116409	2559	-0.0189908	0.0198108	0.337846	0.997113
Colorectal cancer	Triglycerides to total lipids ratio in very large VLDL	4758	0.00573691	0.0145832	0.694048	0.840164	2927	-0.0252063	0.01826	0.167565	0.321167	2611	-0.0191154	0.0189175	0.312369	0.423348	2559	-0.00365825	0.0192028	0.848927	0.997113
Colorectal cancer	Cholesterol to total lipids ratio in very small VLDL	4758	-0.0177724	0.0143284	0.214901	0.682438	2927	0.0223344	0.0177512	0.208424	0.357742	2611	-0.00368201	0.0173933	0.832364	0.882229	2559	0.00423503	0.0195642	0.82864	0.997113
Colorectal cancer	Cholesteryl esters to total lipids ratio in very small VLDL	4758	-0.0212704	0.014422	0.140318	0.608926	2927	0.0220449	0.0177032	0.21314	0.363057	2611	-0.00374423	0.0170979	0.826677	0.880258	2559	-0.00224995	0.0193482	0.907434	0.997113
Colorectal cancer	Free cholesterol to total lipids ratio in very small VLDL	4758	-0.00969993	0.0142361	0.495675	0.753704	2927	0.00995734	0.0179916	0.580001	0.684104	2611	-0.0202218	0.0189915	0.287073	0.397752	2559	0.0144076	0.0191273	0.45137	0.997113
Colorectal cancer	Phospholipids to total lipids ratio in very small VLDL	4758	0.00938184	0.0140351	0.503875	0.753704	2927	0.00613444	0.0170899	0.719658	0.815376	2611	0.024153	0.0168472	0.151792	0.256708	2559	-5.02338e-05	0.0184235	0.997825	0.997825
Colorectal cancer	Triglycerides to total lipids ratio in very small VLDL	4758	0.00971834	0.0145651	0.504654	0.753704	2927	-0.0343237	0.0188613	0.0688915	0.281996	2611	-0.0124803	0.0189042	0.509192	0.61639	2559	-0.00256484	0.0193071	0.894327	0.997113
Colorectal cancer	Triglycerides in HDL	4758	0.0191978	0.0141987	0.176415	0.682438	2927	0.0150265	0.0183438	0.412763	0.539407	2611	0.0262426	0.0180061	0.145119	0.252859	2559	-0.00538712	0.0189445	0.776155	0.997113
Colorectal cancer	Triglycerides in LDL	4758	0.0036479	0.0141012	0.795882	0.906585	2927	-0.00146573	0.0170745	0.931597	0.952299	2611	0.0282022	0.0166641	0.0906912	0.209325	2559	0.00730222	0.0183168	0.690175	0.997113
Colorectal cancer	Total triglycerides	4758	0.0233731	0.0141064	0.0976043	0.583528	2927	0.0215365	0.0186798	0.249032	0.393632	2611	0.0344171	0.0186901	0.0656666	0.177686	2559	-0.00631854	0.0194775	0.74566	0.997113
Colorectal cancer	Triglycerides in VLDL	4758	0.0259807	0.0141358	0.0661346	0.579836	2927	0.0250733	0.0185783	0.177249	0.33144	2611	0.0329193	0.0185524	0.0761142	0.192377	2559	-0.00687436	0.0190326	0.717988	0.997113
Colon cancer	Alanine	4759	3.51853e-05	0.0142379	0.998028	0.998564	2927	0.00868459	0.0189512	0.646799	0.989191	2610	0.03443	0.0183759	0.06109	0.209866	2559	0.0248498	0.0185417	0.180297	0.995831
Colon cancer	Glutamine	4751	-0.0168764	0.0141128	0.231824	0.998564	2926	-0.0441705	0.018514	0.0171061	0.989191	2610	-0.0352494	0.0170914	0.0392682	0.209866	2516	-0.0188802	0.0179577	0.293189	0.995831
Colon cancer	Histidine	4753	0.0119162	0.014272	0.403797	0.998564	2751	-0.00887441	0.0190179	0.640799	0.989191	2610	-0.00192643	0.0189999	0.919247	0.94387	2559	-0.000231846	0.0195889	0.990558	0.995831
Colon cancer	Phenylalanine	4748	0.00862404	0.0144647	0.551062	0.998564	2925	0.0295295	0.018664	0.113719	0.989191	2609	-0.00520083	0.018991	0.784216	0.847333	2558	0.0431419	0.0194917	0.0269622	0.995831
Colon cancer	Tyrosine	4745	0.0030175	0.0138754	0.827851	0.998564	2905	-0.000410123	0.01842	0.982238	0.99785	2610	0.0197598	0.0187486	0.29201	0.420837	2559	0.00226818	0.018459	0.902215	0.995831
Colon cancer	Isoleucine	4759	0.00471686	0.0142697	0.740999	0.998564	2926	0.00676483	0.0178877	0.705322	0.989191	2610	0.00167224	0.0176066	0.92434	0.944881	2556	0.0101829	0.0178571	0.568564	0.995831
Colon cancer	Leucine	4759	-0.00777664	0.0141193	0.581809	0.998564	2927	0.0137782	0.0162611	0.39689	0.989191	2610	-0.00685867	0.0158297	0.664849	0.757006	2559	0.016005	0.0167537	0.33951	0.995831
Colon cancer	Valine	4760	0.00480039	0.0141748	0.734883	0.998564	2927	0.0285447	0.0176836	0.106594	0.989191	2610	-0.0123047	0.0174685	0.481251	0.621841	2557	0.0255933	0.0174613	0.142849	0.995831
Colon cancer	Apolipoprotein A1	4758	0.0115381	0.0142979	0.41972	0.998564	2927	-0.000934561	0.0175829	0.957615	0.99785	2611	0.0241621	0.0174627	0.166587	0.286936	2559	0.022246	0.0180055	0.216755	0.995831
Colon cancer	Apolipoprotein B	4758	0.00164906	0.0142423	0.907827	0.998564	2927	-0.00654262	0.0181561	0.718608	0.989191	2611	0.0408974	0.0192962	0.0341464	0.209866	2559	-0.00559445	0.01982	0.777765	0.995831
Colon cancer	Ratio of apolipoprotein B to apolipoprotein A1	4758	-0.00295563	0.0143899	0.837271	0.998564	2927	-0.00710566	0.0187258	0.704376	0.989191	2611	0.0294908	0.0193908	0.128414	0.246126	2559	-0.0187018	0.0190196	0.325555	0.995831
Colon cancer	Total cholesterol in HDL2	4758	0.00765035	0.0142724	0.591967	0.998564	2927	0.00825802	0.0183683	0.653046	0.989191	2611	0.00274753	0.0179946	0.878658	0.910321	2559	0.0238742	0.0176443	0.176149	0.995831
Colon cancer	Total cholesterol in HDL2	4758	0.0104	0.0142997	0.467087	0.998564	2927	-0.000692154	0.017732	0.968866	0.99785	2611	0.0232286	0.0177055	0.189656	0.309368	2559	0.013346	0.0187134	0.4758	0.995831
Colon cancer	HDL cholesterol	4758	0.00917158	0.0142778	0.520667	0.998564	2927	0.00506212	0.0181817	0.780711	0.989191	2611	0.00941598	0.0178509	0.597905	0.719991	2559	0.0231889	0.0177008	0.190296	0.995831
Colon cancer	LDL cholesterol	4758	0.000755022	0.0142582	0.957771	0.998564	2927	0.00593827	0.017766	0.738216	0.989191	2611	0.0341447	0.0186842	0.067744	0.209866	2559	0.000816727	0.0198766	0.967227	0.995831
Colon cancer	Remnant cholesterol (non-HDL, non-LDL -cholesterol)	4758	0.00380835	0.0143263	0.790382	0.998564	2927	0.0029143	0.0181134	0.87219	0.99785	2611	0.0362903	0.0193505	0.060846	0.209866	2559	-0.00275004	0.0199332	0.89028	0.995831
Colon cancer	Total cholesterol	4758	0.00444478	0.0141864	0.754057	0.998564	2927	0.0046091	0.0175101	0.792396	0.989191	2611	0.0366321	0.0182161	0.0444309	0.209866	2559	0.00960398	0.0194778	0.622004	0.995831
Colon cancer	VLDL cholesterol	4758	0.00486301	0.0143425	0.734577	0.998564	2927	-0.00649913	0.0183947	0.723877	0.989191	2611	0.035809	0.0191765	0.0619666	0.209866	2559	-0.00986557	0.0196899	0.616382	0.995831
Colon cancer	Total esterified cholesterol	4754	0.00426982	0.0142065	0.763768	0.998564	2925	0.00463113	0.0174999	0.791307	0.989191	2602	0.032974	0.0183817	0.0729542	0.209866	2558	0.0095607	0.0195753	0.625304	0.995831
Colon cancer	Ratio of conjugated linoeic acid to total fatty acids	4753	-0.00310253	0.0145928	0.831642	0.998564	2921	0.0172951	0.0181748	0.341382	0.989191	2601	0.0131339	0.0203533	0.518794	0.648492
Colon cancer	Ratio of docosahexaenoic acid to total fatty acids	4755	-0.0078738	0.0144002	0.584553	0.998564	2922	-0.00972169	0.0182141	0.593558	0.989191	2602	0.0260909	0.0189382	0.168419	0.286936	2558	0.0110793	0.0184636	0.548519	0.995831
Colon cancer	Ratio of omega-3 fatty acids to total fatty acids	4755	-0.00929249	0.014579	0.523903	0.998564	2922	0.0179829	0.0179658	0.316931	0.989191	2602	0.0177448	0.0196361	0.366249	0.501413	2558	0.0206807	0.0192748	0.2834	0.995831
Colon cancer	Ratio of omega-6 fatty acids to total fatty acids	4755	0.0063841	0.0142123	0.653311	0.998564	2922	0.0220417	0.0196684	0.262521	0.989191	2602	-0.0484604	0.019358	0.0123622	0.142165	2558	0.014188	0.0199297	0.476592	0.995831
Colon cancer	Ratio of linoleic acid to total fatty acids	4755	0.010738	0.0141066	0.446574	0.998564	2918	0.0296785	0.0191801	0.121885	0.989191	2601	-0.0405165	0.0196763	0.0395789	0.209866	2558	0.0123432	0.0200726	0.538657	0.995831
Colon cancer	Ratio of monounsaturated fatty acids to total fatty acids	4753	-0.000152521	0.0144221	0.991563	0.998564	2918	-0.0157893	0.0193008	0.413386	0.989191	2602	0.031238	0.0193135	0.10591	0.226164	2558	-0.0184011	0.0199444	0.356293	0.995831
Colon cancer	Ratio of polyunsaturated fatty acids to total fatty acids	4755	0.00431678	0.0142209	0.761482	0.998564	2918	0.02455	0.0196255	0.211062	0.989191	2601	-0.0393278	0.0196419	0.0453624	0.209866	2558	0.0192782	0.019968	0.334409	0.995831
Colon cancer	Ratio of saturated fatty acids to total fatty acids	4753	-0.00437312	0.0143956	0.761307	0.998564	2917	-0.0106251	0.0185845	0.567559	0.989191	2601	0.00848922	0.019076	0.656342	0.754794	2558	0.00140298	0.0200142	0.94412	0.995831
Colon cancer	Conjugated linoleic acid	4753	-0.00415834	0.0145279	0.774713	0.998564	2922	0.0150484	0.0181402	0.406853	0.989191	2601	0.0218545	0.0201497	0.278196	0.404969
Colon cancer	Docosahexaenoic acid	4755	-0.00766537	0.0142481	0.590607	0.998564	2923	-0.0132463	0.0174837	0.44873	0.989191	2602	0.0471366	0.0182048	0.00967273	0.117091	2558	0.0149626	0.0182627	0.412693	0.995831
Colon cancer	Estimated description of fatty acid chain length, not actual carbon number	4754	0.0111193	0.0146515	0.44794	0.998564	2917	0.0200761	0.0185694	0.279725	0.989191	2601	0.00649697	0.0194738	0.738689	0.813824
Colon cancer	Omega-3 fatty acids	4755	-0.0074269	0.0143678	0.605242	0.998564	2923	0.00679036	0.0174319	0.696909	0.989191	2602	0.0495528	0.0186047	0.00778205	0.112491	2558	0.0223423	0.0190892	0.241944	0.995831
Colon cancer	Omega-6 fatty acids	4755	0.000333815	0.0141795	0.981219	0.998564	2923	0.00260099	0.0171037	0.879141	0.99785	2602	0.036056	0.0183816	0.0499248	0.209866	2558	0.0144185	0.0193528	0.456318	0.995831
Colon cancer	Linoleic acid	4755	0.00290625	0.0141607	0.837398	0.998564	2919	0.00851312	0.0170661	0.617936	0.989191	2601	0.0334821	0.0184195	0.069217	0.209866	2558	0.0177417	0.0195637	0.364562	0.995831
Colon cancer	Monounsaturated fatty acids	4753	0.00164574	0.0141968	0.907718	0.998564	2919	-0.0151571	0.0182747	0.406945	0.989191	2602	0.0501563	0.0187424	0.00749557	0.112491	2558	0.000451236	0.0196451	0.981676	0.995831
Colon cancer	Polyunsaturated fatty acids	4755	-0.000788643	0.0141645	0.955601	0.998564	2919	0.0034507	0.0170908	0.840006	0.99785	2601	0.0394271	0.0183319	0.0315891	0.209866	2558	0.0158808	0.0193328	0.41147	0.995831
Colon cancer	Saturated fatty acids	4753	-0.00246169	0.0140466	0.860889	0.998564	2918	-0.0127251	0.018023	0.480216	0.989191	2601	0.0536482	0.0185649	0.00388718	0.112491	2558	0.0101476	0.0194859	0.602575	0.995831
Colon cancer	Total fatty acids	4755	-0.000765628	0.0140858	0.956655	0.998564	2924	-0.00744586	0.0175359	0.671154	0.989191	2602	0.0508315	0.0184213	0.00583159	0.112491	2558	0.0101025	0.0194538	0.603592	0.995831
Colon cancer	Degree of unsaturation	4754	0.000505835	0.0141433	0.971471	0.998564	2923	0.0364169	0.0189125	0.0542575	0.989191	2602	-0.00953148	0.0200529	0.634602	0.744686
Colon cancer	Albumin	4751	0.0325272	0.0140162	0.0203456	0.998564	2927	0.0337723	0.0182669	0.0645837	0.989191	2611	0.000398969	0.0182312	0.982542	0.982542	2559	0.00776031	0.0187837	0.679538	0.995831
Colon cancer	Creatinine	4752	-0.00403936	0.0139971	0.772911	0.998564	2925	0.00234924	0.0170686	0.890538	0.99785	2610	-0.00381435	0.0153137	0.803317	0.851442	2559	0.00495755	0.0160055	0.756784	0.995831
Colon cancer	Total free cholesterol	4754	0.00355454	0.0141926	0.80225	0.998564	2925	0.0027566	0.017739	0.876519	0.99785	2601	0.0433567	0.0182595	0.017646	0.17646	2558	0.00932567	0.0194707	0.632009	0.995831
Colon cancer	Citrate	4751	-0.0129093	0.0142687	0.365655	0.998564	2912	-0.0308154	0.0184645	0.0952456	0.989191	2610	-0.0100291	0.0196925	0.610594	0.727651	2559	-0.0033747	0.0204176	0.868734	0.995831
Colon cancer	Glucose	4737	-0.00181376	0.0142793	0.89893	0.998564	2920	0.0124289	0.0176516	0.481412	0.989191	2610	0.0255519	0.0182819	0.162333	0.282854	2555	0.00634748	0.018752	0.735017	0.995831
Colon cancer	Lactate	4759	0.015175	0.0141449	0.283404	0.998564	2920	0.0117508	0.0181772	0.518035	0.989191	2610	0.0115818	0.018877	0.539574	0.670821	2559	-0.0132131	0.019516	0.498441	0.995831
Colon cancer	Glycoprotein acetyls	4759	-0.00166064	0.014054	0.905945	0.998564	2925	-0.0105632	0.0179286	0.555784	0.989191	2610	0.0104489	0.0192236	0.586801	0.710338	2559	-0.00911456	0.0195024	0.640285	0.995831
Colon cancer	Acetoacetate	4755	0.0148982	0.0143282	0.298493	0.998564	2927	-0.0240891	0.0192925	0.211903	0.989191	2610	0.00795002	0.0196054	0.685142	0.772464	2559	-0.00392646	0.0186943	0.833657	0.995831
Colon cancer	Acetate	4760	-0.0311324	0.0143722	0.0303483	0.998564	2925	-0.0226982	0.018735	0.225788	0.989191	2608	-0.0265298	0.0194013	0.171611	0.290224	2559	-0.0170436	0.0201581	0.397911	0.995831
Colon cancer	3-Hydroxybutyrate	4757	-0.00958491	0.014441	0.506895	0.998564	2925	-0.00282872	0.0180648	0.875581	0.99785	2607	0.0157298	0.0186952	0.400211	0.535166	2554	-0.0231624	0.0190581	0.224342	0.995831
Colon cancer	Average diameter for HDL particles	4758	0.00122579	0.0142381	0.931397	0.998564	2927	0.017518	0.0181355	0.334147	0.989191	2611	0.010734	0.0185849	0.563606	0.693205	2559	0.0364988	0.0177124	0.0394388	0.995831
Colon cancer	Average diameter for LDL particles	4758	-0.00445768	0.0145457	0.759268	0.998564	2927	0.0289861	0.0182389	0.112113	0.989191	2611	-0.0252696	0.0186467	0.175479	0.293991	2559	0.00603992	0.0187652	0.747579	0.995831
Colon cancer	Average diameter for VLDL particles	4758	0.00559574	0.0142454	0.694477	0.998564	2927	-0.017601	0.0189345	0.352671	0.989191	2611	0.0221276	0.0188531	0.24063	0.371442	2559	-0.0234202	0.0187122	0.210831	0.995831
Colon cancer	Cholesterol in chylomicrons and extremely large VLDL	4758	0.00815735	0.0142097	0.565948	0.998564	2927	-0.0139758	0.0185576	0.451449	0.989191	2611	0.0361691	0.0190398	0.0575884	0.209866	2559	-0.00187283	0.0191032	0.92191	0.995831
Colon cancer	Cholesteryl esters in chylomicrons and extremely large VLDL	4758	0.011753	0.0141621	0.406639	0.998564	2927	-0.00725015	0.0185525	0.69598	0.989191	2611	0.0361389	0.0189923	0.0571743	0.209866	2559	0.00258157	0.0194223	0.894269	0.995831
Colon cancer	Free cholesterol in chylomicrons and extremely large VLDL	4758	0.00448647	0.0141591	0.751362	0.998564	2927	-0.0143133	0.0185887	0.441362	0.989191	2611	0.034095	0.019032	0.073336	0.209866	2559	-0.00818608	0.0190348	0.66719	0.995831
Colon cancer	Total lipids in chylomicrons and extremely large VLDL	4758	0.0043106	0.0141931	0.761361	0.998564	2927	-0.0154024	0.0185704	0.406943	0.989191	2611	0.0339354	0.0190405	0.0748216	0.209866	2559	-0.00370293	0.0195106	0.849488	0.995831
Colon cancer	Concentration of chylomicrons and extremely large VLDL particles	4758	0.00462999	0.0141908	0.744237	0.998564	2927	-0.0139716	0.0185443	0.451262	0.989191	2611	0.0335838	0.0190045	0.0773204	0.213598	2559	-0.00352293	0.0195206	0.856796	0.995831
Colon cancer	Phospholipids in chylomicrons and extremely large VLDL	4758	0.00397617	0.01416	0.778873	0.998564	2927	-0.0154309	0.0185092	0.404524	0.989191	2611	0.0346907	0.0190508	0.0687286	0.209866	2559	0.000398294	0.0185051	0.98283	0.995831
Colon cancer	Triglycerides in chylomicrons and extremely large VLDL	4758	0.00348334	0.01417	0.805828	0.998564	2927	-0.0153885	0.0185704	0.407367	0.989191	2611	0.0332721	0.0190092	0.0801812	0.216407	2559	-0.00270927	0.019544	0.889758	0.995831
Colon cancer	Cholesterol in IDL	4758	0.00330029	0.0142642	0.817038	0.998564	2927	0.011743	0.0180305	0.514912	0.989191	2611	0.0287649	0.0192685	0.135599	0.254559	2559	0.002698	0.0199395	0.892378	0.995831
Colon cancer	Cholesteryl esters in IDL	4758	0.00472536	0.0143059	0.741181	0.998564	2927	0.0112135	0.0181245	0.536166	0.989191	2611	0.0287873	0.0193644	0.13724	0.254559	2559	0.00124291	0.0199758	0.950392	0.995831
Colon cancer	Free cholesterol in IDL	4758	-0.000372528	0.014191	0.979058	0.998564	2927	0.0117646	0.0179239	0.511643	0.989191	2611	0.0270366	0.0188452	0.151502	0.274374	2559	0.00655526	0.0197471	0.739946	0.995831
Colon cancer	Total lipids in IDL	4758	0.000822896	0.0141965	0.953779	0.998564	2927	0.00860482	0.0177796	0.628442	0.989191	2611	0.0339365	0.018911	0.0728428	0.209866	2559	0.00366607	0.019876	0.853677	0.995831
Colon cancer	Concentration of IDL particles	4758	-0.00153904	0.0141987	0.913688	0.998564	2927	0.00635112	0.0177202	0.720062	0.989191	2611	0.0367991	0.0187557	0.0498657	0.209866	2559	0.0031956	0.0198529	0.872134	0.995831
Colon cancer	Phospholipids in IDL	4758	8.65423e-05	0.0142283	0.995147	0.998564	2927	0.00909209	0.0176704	0.606915	0.989191	2611	0.0328315	0.018622	0.0780099	0.213598	2559	0.00587851	0.0197995	0.766566	0.995831
Colon cancer	Triglycerides in IDL	4758	-0.00697744	0.014181	0.622723	0.998564	2927	-0.00873775	0.0175134	0.617874	0.989191	2611	0.0472298	0.0177451	0.00782548	0.112491	2559	0.00552621	0.0191039	0.772398	0.995831
Colon cancer	Cholesterol in large HDL	4758	0.00604988	0.0142578	0.67135	0.998564	2927	0.0131529	0.0182644	0.471496	0.989191	2611	0.000462865	0.0183184	0.979843	0.982542	2559	0.0325781	0.0174985	0.062751	0.995831
Colon cancer	Cholesteryl esters in large HDL	4758	0.00649622	0.0142651	0.648849	0.998564	2927	0.0132753	0.0182904	0.468015	0.989191	2611	0.000794721	0.018335	0.96543	0.981525	2559	0.0327931	0.017488	0.0608832	0.995831
Colon cancer	Free cholesterol in large HDL	4758	0.00491055	0.0142379	0.73019	0.998564	2927	0.01246	0.0181909	0.493425	0.989191	2611	-0.000617511	0.0182363	0.97299	0.981525	2559	0.032178	0.0175274	0.0664936	0.995831
Colon cancer	Total lipids in large HDL	4758	0.0069699	0.0142779	0.625458	0.998564	2927	0.0120008	0.0181364	0.508218	0.989191	2611	0.00466075	0.0180042	0.795756	0.847333	2559	0.033169	0.0173513	0.0560373	0.995831
Colon cancer	Concentration of large HDL particles	4758	0.00729979	0.0142727	0.609058	0.998564	2927	0.0130471	0.0182018	0.473552	0.989191	2611	0.00819755	0.0179084	0.647171	0.7506	2559	0.0333353	0.0173374	0.0546236	0.995831
Colon cancer	Phospholipids in large HDL	4758	0.00777383	0.0142994	0.586711	0.998564	2927	0.0101984	0.0179209	0.569349	0.989191	2611	0.00722808	0.0176833	0.682756	0.772464	2559	0.0328834	0.0172945	0.0573648	0.995831
Colon cancer	Triglycerides in large HDL	4758	0.00810107	0.0144009	0.573774	0.998564	2927	0.00818905	0.0176941	0.643533	0.989191	2611	0.0255282	0.018188	0.160565	0.282645	2559	0.0367376	0.017647	0.0374597	0.995831
Colon cancer	Cholesterol in large LDL	4758	0.0011604	0.014219	0.934961	0.998564	2927	0.00771053	0.017743	0.663908	0.989191	2611	0.0334933	0.0186638	0.0728396	0.209866	2559	0.00222626	0.0199372	0.911099	0.995831
Colon cancer	Cholesteryl esters in large LDL	4758	0.00127699	0.014224	0.928468	0.998564	2927	0.0070275	0.0177306	0.691876	0.989191	2611	0.0348223	0.0186851	0.0624841	0.209866	2559	0.00209362	0.0199507	0.916432	0.995831
Colon cancer	Free cholesterol in large LDL	4758	0.000382596	0.0142035	0.978511	0.998564	2927	0.00897464	0.0178242	0.614644	0.989191	2611	0.028611	0.0186292	0.124705	0.241027	2559	0.00341943	0.0198446	0.863207	0.995831
Colon cancer	Total lipids in large LDL	4758	0.000521922	0.0141992	0.97068	0.998564	2927	0.00589464	0.0175771	0.737378	0.989191	2611	0.0364951	0.0184624	0.0481773	0.209866	2559	0.00351175	0.0199037	0.859964	0.995831
Colon cancer	Concentration of large LDL particles	4758	0.00118817	0.0142517	0.933561	0.998564	2927	0.00404812	0.0175373	0.817464	0.989191	2611	0.0377339	0.0183447	0.039792	0.209866	2559	0.0037226	0.0198939	0.851579	0.995831
Colon cancer	Phospholipids in large LDL	4758	0.00226434	0.0142351	0.873623	0.998564	2927	0.0060327	0.0175806	0.731514	0.989191	2611	0.0355879	0.0185546	0.0552189	0.209866	2559	0.00339773	0.0198533	0.864126	0.995831
Colon cancer	Triglycerides in large LDL	4758	-0.00614034	0.0142478	0.666512	0.998564	2927	-0.00784721	0.017469	0.653315	0.989191	2611	0.0491796	0.0172491	0.00439066	0.112491	2559	0.0111262	0.0185968	0.549701	0.995831
Colon cancer	Cholesterol in large VLDL	4758	0.00729549	0.0141996	0.60743	0.998564	2927	-0.0167699	0.0186298	0.368107	0.989191	2611	0.0306122	0.0189945	0.107163	0.226164	2559	-0.0131789	0.0193216	0.49525	0.995831
Colon cancer	Cholesteryl esters in large VLDL	4758	0.00838565	0.0141801	0.554303	0.998564	2927	-0.0158707	0.0186104	0.39385	0.989191	2611	0.0298552	0.0189568	0.115399	0.234883	2559	-0.0125534	0.0192895	0.515242	0.995831
Colon cancer	Free cholesterol in large VLDL	4758	0.00465785	0.0141672	0.742339	0.998564	2927	-0.0172471	0.0186798	0.355927	0.989191	2611	0.0321165	0.0190846	0.0925239	0.221672	2559	-0.0145292	0.0188198	0.440173	0.995831
Colon cancer	Total lipids in large VLDL	4758	0.00533637	0.0141812	0.706712	0.998564	2927	-0.01779	0.0188641	0.345727	0.989191	2611	0.0308693	0.019111	0.106376	0.226164	2559	-0.0154874	0.0192986	0.42233	0.995831
Colon cancer	Concentration of large VLDL particles	4758	0.00557875	0.0141995	0.694423	0.998564	2927	-0.0180088	0.0188856	0.340377	0.989191	2611	0.031379	0.0191124	0.100749	0.226164	2559	-0.0160808	0.0192566	0.403751	0.995831
Colon cancer	Phospholipids in large VLDL	4758	0.00519461	0.0141863	0.714254	0.998564	2927	-0.0184481	0.0187646	0.325623	0.989191	2611	0.0323329	0.0190956	0.090534	0.219825	2559	-0.0147349	0.0194192	0.448054	0.995831
Colon cancer	Triglycerides in large VLDL	4758	0.00496901	0.0142355	0.727062	0.998564	2927	-0.0183533	0.0189266	0.332272	0.989191	2611	0.0302459	0.019073	0.112906	0.232431	2559	-0.0165542	0.0192314	0.389435	0.995831
Colon cancer	Cholesterol in medium HDL	4758	0.0240906	0.0146311	0.0997215	0.998564	2927	-0.00102762	0.0181078	0.954748	0.99785	2611	-0.00490086	0.0182779	0.78862	0.847333	2559	0.0145333	0.0183915	0.429472	0.995831
Colon cancer	Cholesteryl esters in medium HDL	4758	0.0235494	0.0146003	0.106824	0.998564	2927	-0.00193432	0.0182044	0.915387	0.99785	2611	-0.00600289	0.0183774	0.743963	0.814817	2559	0.0141674	0.0184498	0.442624	0.995831
Colon cancer	Free cholesterol in medium HDL	4758	0.0254032	0.0147094	0.0842325	0.998564	2927	-0.000691067	0.0177013	0.968861	0.99785	2611	0.00184756	0.017814	0.917404	0.94387	2559	0.0153143	0.0182196	0.400687	0.995831
Colon cancer	Total lipids in medium HDL	4758	0.0256516	0.0146689	0.0804071	0.998564	2927	-0.00265435	0.0179866	0.882689	0.99785	2611	0.00813523	0.0177891	0.647483	0.7506	2559	0.0163977	0.0181812	0.367192	0.995831
Colon cancer	Concentration of medium HDL particles	4758	0.0262849	0.0146629	0.0730981	0.998564	2927	-0.00176353	0.0180222	0.922055	0.99785	2611	0.0122582	0.0176583	0.487623	0.623074	2559	0.0167458	0.018158	0.356496	0.995831
Colon cancer	Phospholipids in medium HDL	4758	0.0242637	0.0146285	0.0972508	0.998564	2927	-0.000318424	0.018086	0.985954	0.99785	2611	0.0161169	0.0175176	0.357638	0.495409	2559	0.0172677	0.0180042	0.337603	0.995831
Colon cancer	Triglycerides in medium HDL	4758	0.0112871	0.0142281	0.427644	0.998564	2927	-0.0105056	0.0182608	0.565129	0.989191	2611	0.0290027	0.0186654	0.120348	0.23862	2559	0.0068265	0.0192679	0.723148	0.995831
Colon cancer	Cholesterol in medium LDL	4758	0.000483581	0.014283	0.972993	0.998564	2927	0.00496004	0.0177763	0.780245	0.989191	2611	0.0346665	0.0187062	0.0639662	0.209866	2559	0.000289359	0.0198622	0.988378	0.995831
Colon cancer	Cholesteryl esters in medium LDL	4758	0.000460454	0.0142987	0.974312	0.998564	2927	0.00458983	0.0177423	0.795889	0.989191	2611	0.034807	0.0186961	0.0627543	0.209866	2559	0.00082346	0.0199269	0.967041	0.995831
Colon cancer	Free cholesterol in medium LDL	4758	0.00147015	0.0142557	0.917867	0.998564	2927	0.00327448	0.0178721	0.85464	0.99785	2611	0.0315786	0.0186653	0.0907971	0.219825	2559	-0.000491522	0.0198812	0.980278	0.995831
Colon cancer	Total lipids in medium LDL	4758	0.00084634	0.014267	0.952699	0.998564	2927	0.00218322	0.0175773	0.90116	0.99785	2611	0.0383515	0.0184274	0.037511	0.209866	2559	0.000684625	0.0198837	0.972536	0.995831
Colon cancer	Concentration of medium LDL particles	4758	0.00127878	0.0142833	0.928665	0.998564	2927	0.000112016	0.0175501	0.994908	0.99785	2611	0.0399973	0.0183085	0.0290043	0.209866	2559	0.00118627	0.0198967	0.952462	0.995831
Colon cancer	Phospholipids in medium LDL	4758	0.00480769	0.0142265	0.735424	0.998564	2927	-0.000890504	0.0175011	0.959422	0.99785	2611	0.0402547	0.0183841	0.0286378	0.209866	2559	-0.00110728	0.019818	0.955447	0.995831
Colon cancer	Triglycerides in medium LDL	4758	-0.00496477	0.0143065	0.728585	0.998564	2927	-0.0108053	0.0174277	0.535302	0.989191	2611	0.0470802	0.016749	0.0049769	0.112491	2559	0.0170614	0.0183861	0.353519	0.995831
Colon cancer	Cholesterol in medium VLDL	4758	0.0100432	0.0142237	0.480166	0.998564	2927	-0.0122929	0.0185589	0.507784	0.989191	2611	0.0311783	0.0189774	0.100521	0.226164	2559	-0.0117779	0.019461	0.545096	0.995831
Colon cancer	Cholesteryl esters in medium VLDL	4758	0.00989253	0.014142	0.484266	0.998564	2927	-0.00605083	0.0185118	0.743795	0.989191	2611	0.0294333	0.0189111	0.119733	0.23862	2559	-0.00579149	0.0196171	0.767844	0.995831
Colon cancer	Free cholesterol in medium VLDL	4758	0.00628376	0.0142212	0.658611	0.998564	2927	-0.0178564	0.0187973	0.342219	0.989191	2611	0.0325358	0.0190832	0.0883237	0.218435	2559	-0.0175873	0.019269	0.361473	0.995831
Colon cancer	Total lipids in medium VLDL	4758	0.00647682	0.0142029	0.648395	0.998564	2927	-0.0177503	0.0188078	0.345365	0.989191	2611	0.0294752	0.0190453	0.121831	0.239496	2559	-0.0193246	0.0191348	0.312632	0.995831
Colon cancer	Concentration of medium VLDL particles	4758	0.0056748	0.0142238	0.689937	0.998564	2927	-0.017949	0.0188549	0.341199	0.989191	2611	0.0298212	0.0190777	0.118141	0.238354	2559	-0.0200856	0.019084	0.292676	0.995831
Colon cancer	Phospholipids in medium VLDL	4758	0.00577769	0.014209	0.684304	0.998564	2927	-0.0185942	0.018749	0.321404	0.989191	2611	0.0318461	0.0190843	0.0952962	0.22596	2559	-0.0187905	0.0192139	0.328183	0.995831
Colon cancer	Triglycerides in medium VLDL	4758	0.00484804	0.0142304	0.733358	0.998564	2927	-0.0182444	0.0189792	0.336488	0.989191	2611	0.0285838	0.0190476	0.133567	0.253888	2559	-0.0240392	0.0189413	0.204506	0.995831
Colon cancer	Cholesterol in small HDL	4758	0.0187037	0.014557	0.198905	0.998564	2927	-0.00412074	0.0175715	0.814604	0.989191	2611	0.0196325	0.0164584	0.233034	0.367108	2559	-0.0159446	0.0194539	0.412515	0.995831
Colon cancer	Cholesteryl esters in small HDL	4758	0.016604	0.0144004	0.24896	0.998564	2927	-0.0014862	0.0173988	0.931934	0.99785	2611	0.021712	0.0161014	0.177629	0.293991	2559	-0.0179216	0.019583	0.360191	0.995831
Colon cancer	Free cholesterol in small HDL	4758	0.0172724	0.0146061	0.237049	0.998564	2927	-0.011782	0.0188016	0.530936	0.989191	2611	0.00927515	0.0187967	0.62174	0.737114	2559	-0.00298201	0.0190857	0.875854	0.995831
Colon cancer	Total lipids in small HDL	4758	0.0185967	0.0147567	0.207651	0.998564	2927	-0.0166556	0.0181821	0.35972	0.989191	2611	0.0159093	0.0180178	0.37733	0.51273	2559	-0.0119197	0.0192133	0.535055	0.995831
Colon cancer	Concentration of small HDL particles	4758	0.0162244	0.0146678	0.268727	0.998564	2927	-0.0200072	0.0185656	0.281278	0.989191	2611	0.0126839	0.0187867	0.499636	0.627958	2559	-0.0114098	0.0192191	0.552784	0.995831
Colon cancer	Phospholipids in small HDL	4758	0.0155005	0.014493	0.284892	0.998564	2927	-0.0181732	0.0187946	0.333655	0.989191	2611	0.00705108	0.0190414	0.711187	0.796133	2559	-0.00383315	0.0191655	0.841495	0.995831
Colon cancer	Triglycerides in small HDL	4758	-0.00439987	0.0143769	0.75959	0.998564	2927	-0.012878	0.0189949	0.497843	0.989191	2611	0.047187	0.0192076	0.0140875	0.147278	2559	-0.00902398	0.0195894	0.645085	0.995831
Colon cancer	Cholesterol in small LDL	4758	0.00045275	0.0143274	0.974792	0.998564	2927	0.00420396	0.0178455	0.813778	0.989191	2611	0.034165	0.0186879	0.0676349	0.209866	2559	0.000103626	0.0198314	0.995831	0.995831
Colon cancer	Cholesteryl esters in small LDL	4758	0.00053181	0.0143277	0.970393	0.998564	2927	0.00465485	0.0177957	0.79367	0.989191	2611	0.0343014	0.018641	0.0658664	0.209866	2559	0.000906563	0.0199277	0.963718	0.995831
Colon cancer	Free cholesterol in small LDL	4758	0.00378541	0.0144329	0.793119	0.998564	2927	0.0016946	0.0181073	0.925444	0.99785	2611	0.0304882	0.0187658	0.104354	0.226164	2559	-0.000638119	0.0198884	0.974407	0.995831
Colon cancer	Total lipids in small LDL	4758	0.000641524	0.0142914	0.964198	0.998564	2927	4.76349e-05	0.0176774	0.99785	0.99785	2611	0.0390895	0.018476	0.0344657	0.209866	2559	0.00091167	0.0198412	0.963355	0.995831
Colon cancer	Concentration of small LDL particles	4758	0.000898	0.0143162	0.949987	0.998564	2927	-0.0040851	0.0176746	0.817231	0.989191	2611	0.0408696	0.018307	0.0256696	0.209866	2559	0.00116708	0.0198111	0.953028	0.995831
Colon cancer	Phospholipids in small LDL	4758	0.0024066	0.0142531	0.865924	0.998564	2927	-0.00571711	0.0176501	0.746026	0.989191	2611	0.0409305	0.0184901	0.0269395	0.209866	2559	-0.000443331	0.0197372	0.982081	0.995831
Colon cancer	Triglycerides in small LDL	4758	-0.00242541	0.0142969	0.865296	0.998564	2927	-0.0169886	0.0180325	0.346213	0.989191	2611	0.0492186	0.017617	0.00524701	0.112491	2559	0.010848	0.0192866	0.573849	0.995831
Colon cancer	Cholesterol in small VLDL	4758	0.00191143	0.014389	0.894326	0.998564	2927	-0.00666777	0.0181971	0.714079	0.989191	2611	0.0353839	0.0192287	0.0658579	0.209866	2559	-0.0092567	0.0196018	0.636798	0.995831
Colon cancer	Cholesteryl esters in small VLDL	4758	0.00227004	0.0144057	0.874795	0.998564	2927	0.000486044	0.0183028	0.978816	0.99785	2611	0.0308849	0.0193541	0.110659	0.231377	2559	-0.00772415	0.019707	0.695128	0.995831
Colon cancer	Free cholesterol in small VLDL	4758	0.000593916	0.0143297	0.966942	0.998564	2927	-0.0171197	0.0183124	0.349932	0.989191	2611	0.0389841	0.0191483	0.0418605	0.209866	2559	-0.0116926	0.0194331	0.547438	0.995831
Colon cancer	Total lipids in small VLDL	4758	0.00135657	0.0143411	0.924642	0.998564	2927	-0.0182569	0.0184971	0.323718	0.989191	2611	0.0371519	0.0192141	0.0532739	0.209866	2559	-0.0149654	0.0193298	0.438876	0.995831
Colon cancer	Concentration of small VLDL particles	4758	0.00150196	0.0143381	0.916576	0.998564	2927	-0.0198094	0.0186862	0.289182	0.989191	2611	0.035917	0.0192416	0.0620644	0.209866	2559	-0.0169864	0.0193048	0.378994	0.995831
Colon cancer	Phospholipids in small VLDL	4758	0.000719405	0.0143841	0.960113	0.998564	2927	-0.0206261	0.018414	0.26275	0.989191	2611	0.0360983	0.0191221	0.0591669	0.209866	2559	-0.0133972	0.0194005	0.489906	0.995831
Colon cancer	Triglycerides in small VLDL	4758	0.00135822	0.014292	0.924292	0.998564	2927	-0.0230633	0.0189595	0.223912	0.989191	2611	0.0356383	0.0194702	0.0673043	0.209866	2559	-0.0215948	0.0190248	0.256447	0.995831
Colon cancer	Cholesterol in very large HDL	4758	-0.00798363	0.0139517	0.567192	0.998564	2927	0.00499819	0.0184212	0.786158	0.989191	2611	0.0226101	0.0191552	0.237964	0.369809	2559	0.0232507	0.018265	0.203147	0.995831
Colon cancer	Cholesteryl esters in very large HDL	4758	-0.00876343	0.0139245	0.529148	0.998564	2927	0.00372499	0.0185403	0.84078	0.99785	2611	0.0221253	0.0192014	0.249313	0.37751	2559	0.0219298	0.0183451	0.232042	0.995831
Colon cancer	Free cholesterol in very large HDL	4758	-0.00521306	0.0140291	0.710215	0.998564	2927	0.00869143	0.0181498	0.632066	0.989191	2611	0.0197414	0.0189411	0.297392	0.424846	2559	0.0264761	0.0179335	0.139974	0.995831
Colon cancer	Total lipids in very large HDL	4758	-0.00398538	0.0140639	0.7769	0.998564	2927	0.0101121	0.0181438	0.577342	0.989191	2611	0.0208902	0.0187022	0.2641	0.391891	2559	0.0282279	0.0179599	0.116139	0.995831
Colon cancer	Concentration of very large HDL particles	4758	-0.00219755	0.014116	0.876294	0.998564	2927	0.0131739	0.0179871	0.463978	0.989191	2611	0.0203473	0.0184208	0.269444	0.395873	2559	0.0289183	0.0179491	0.107276	0.995831
Colon cancer	Phospholipids in very large HDL	4758	-8.01112e-05	0.0141917	0.995496	0.998564	2927	0.0139878	0.0178885	0.43431	0.989191	2611	0.0133225	0.0181681	0.463447	0.602219	2559	0.0328078	0.0178023	0.0654602	0.995831
Colon cancer	Triglycerides in very large HDL	4758	-0.00283879	0.0143787	0.843499	0.998564	2927	0.00553775	0.0185714	0.765581	0.989191	2611	0.0471097	0.0189866	0.0131566	0.144096	2559	0.0356097	0.0191007	0.0623928	0.995831
Colon cancer	Cholesterol in very large VLDL	4758	0.00596491	0.0142082	0.674635	0.998564	2927	-0.0151953	0.0185785	0.413483	0.989191	2611	0.032461	0.0190016	0.0876944	0.218435	2559	-0.00678203	0.0188804	0.719468	0.995831
Colon cancer	Cholesteryl esters in very large VLDL	4758	0.00664149	0.0141976	0.639956	0.998564	2927	-0.0144047	0.0185934	0.438567	0.989191	2611	0.0299578	0.0189059	0.113184	0.232431	2559	-0.00815795	0.019003	0.667743	0.995831
Colon cancer	Free cholesterol in very large VLDL	4758	0.00553301	0.0141737	0.69628	0.998564	2927	-0.0147189	0.0185762	0.428221	0.989191	2611	0.0341829	0.0190532	0.0729167	0.209866	2559	-0.00406065	0.0190401	0.831135	0.995831
Colon cancer	Total lipids in very large VLDL	4758	0.00473027	0.0141594	0.738339	0.998564	2927	-0.0177835	0.0186485	0.340357	0.989191	2611	0.0315725	0.0190086	0.0968422	0.226164	2559	-0.0183665	0.0194983	0.346305	0.995831
Colon cancer	Concentration of very large VLDL particles	4758	0.00456667	0.0141574	0.747039	0.998564	2927	-0.0157283	0.0186545	0.39922	0.989191	2611	0.0312462	0.0190068	0.100308	0.226164	2559	-0.0183163	0.0195051	0.347794	0.995831
Colon cancer	Phospholipids in very large VLDL	4758	0.00465457	0.0141611	0.742407	0.998564	2927	-0.0151044	0.0185972	0.41675	0.989191	2611	0.0329306	0.0190637	0.0842143	0.217133	2559	-0.00110014	0.0191945	0.954298	0.995831
Colon cancer	Triglycerides in very large VLDL	4758	0.00342021	0.014215	0.809872	0.998564	2927	-0.016815	0.0187549	0.370025	0.989191	2611	0.0306443	0.0190155	0.107182	0.226164	2559	-0.0177833	0.0194071	0.35958	0.995831
Colon cancer	Cholesterol in very small VLDL	4758	0.00164804	0.0144713	0.909335	0.998564	2927	0.0132633	0.0187052	0.478337	0.989191	2611	0.0187439	0.0195863	0.33866	0.472071	2559	-0.00504996	0.0199654	0.800339	0.995831
Colon cancer	Cholesteryl esters in very small VLDL	4758	-0.00187192	0.0144705	0.897077	0.998564	2927	0.0146247	0.0189013	0.439147	0.989191	2611	0.0136722	0.0195347	0.484055	0.62197	2559	-0.00813236	0.0198867	0.682622	0.995831
Colon cancer	Free cholesterol in very small VLDL	4758	0.00676996	0.014426	0.638885	0.998564	2927	0.00813824	0.0182029	0.654848	0.989191	2611	0.0251761	0.0191427	0.188565	0.309368	2559	0.00167284	0.0199564	0.933202	0.995831
Colon cancer	Total lipids in very small VLDL	4758	0.000478938	0.0143926	0.973455	0.998564	2927	0.00479492	0.0180438	0.79046	0.989191	2611	0.036137	0.0194084	0.0627257	0.209866	2559	-0.00360216	0.019898	0.856358	0.995831
Colon cancer	Concentration of very small VLDL particles	4758	0.000721604	0.0142815	0.959704	0.998564	2927	0.00119952	0.0177554	0.946142	0.99785	2611	0.0404525	0.0189845	0.0331974	0.209866	2559	-0.00402485	0.0198785	0.839564	0.995831
Colon cancer	Phospholipids in very small VLDL	4758	0.00201738	0.0142282	0.887254	0.998564	2927	0.00510199	0.0175559	0.771368	0.989191	2611	0.038115	0.018895	0.043777	0.209866	2559	0.00427834	0.0198053	0.828989	0.995831
Colon cancer	Triglycerides in very small VLDL	4758	-0.00323528	0.014258	0.820503	0.998564	2927	-0.0192988	0.0184733	0.296254	0.989191	2611	0.0438136	0.0191259	0.0220545	0.199794	2559	-0.00930391	0.0195887	0.634854	0.995831
Colon cancer	Diacylglycerol	4665	0.00924257	0.0143602	0.51985	0.998564	2823	-0.0240283	0.0189205	0.204203	0.989191	2544	0.0375743	0.0199237	0.059421	0.209866
Colon cancer	Phosphatidylcholines	4735	0.00782947	0.014179	0.580846	0.998564	2881	0.0159642	0.0176731	0.36644	0.989191	2579	0.0519185	0.017934	0.00382388	0.112491	2558	0.0142361	0.0188191	0.449437	0.995831
Colon cancer	Sphingomyelins	4691	0.00387313	0.0141876	0.784869	0.998564	2923	0.00280744	0.0173512	0.871474	0.99785	2433	0.0303701	0.017393	0.0809175	0.216407
Colon cancer	Ratio of triglycerides to phosphoglycerides	4753	0.00375814	0.0143449	0.793345	0.998564	2923	-0.00122432	0.0190267	0.948698	0.99785	2600	0.0206946	0.0187659	0.270227	0.395873	2555	-0.0214955	0.0187918	0.252783	0.995831
Colon cancer	Total cholines	4754	0.000579613	0.0142753	0.967614	0.998564	2918	0.00536317	0.0172523	0.755924	0.989191	2602	0.0474666	0.0175687	0.00694176	0.112491	2558	0.0177884	0.0185783	0.338414	0.995831
Colon cancer	Phosphoglycerides	4753	-0.00323687	0.0142969	0.820898	0.998564	2924	-0.00684332	0.0173209	0.692806	0.989191	2601	0.0480357	0.0177824	0.00695172	0.112491	2558	0.0205048	0.018271	0.261858	0.995831
Colon cancer	Cholesterol to total lipids ratio in chylomicrons and extremely large VLDL	4758	0.030216	0.0139547	0.0304142	0.998564	2927	-0.0040037	0.0177399	0.821459	0.989191	2611	0.0272505	0.0183275	0.137172	0.254559	2559	-0.00134258	0.0191917	0.944234	0.995831
Colon cancer	Cholesteryl esters to total lipids ratio in chylomicrons and extremely large VLDL	4758	0.0291028	0.0140613	0.0385342	0.998564	2927	-0.000319164	0.0177325	0.985641	0.99785	2611	0.0211016	0.0184494	0.252832	0.380074	2559	0.00423665	0.0193385	0.826607	0.995831
Colon cancer	Free cholesterol to total lipids ratio in chylomicrons and extremely large VLDL	4758	0.00639861	0.014175	0.651721	0.998564	2927	-0.0021845	0.018523	0.906128	0.99785	2611	0.0273613	0.0187176	0.143918	0.264809	2559	-0.0117645	0.0189782	0.535382	0.995831
Colon cancer	Phospholipids to total lipids ratio in chylomicrons and extremely large VLDL	4758	0.000394792	0.0141725	0.977778	0.998564	2927	-0.00510265	0.0181416	0.778525	0.989191	2611	0.0161374	0.0187646	0.389874	0.524392	2559	0.0087165	0.0185462	0.638404	0.995831
Colon cancer	Triglycerides to total lipids ratio in chylomicrons and extremely large VLDL	4758	-0.0300819	0.0140291	0.0320637	0.998564	2927	0.00560438	0.0175851	0.749976	0.989191	2611	-0.031489	0.0182732	0.0849652	0.217133	2559	-0.00180351	0.0188824	0.923915	0.995831
Colon cancer	Cholesterol to total lipids ratio in IDL	4758	0.00960032	0.0144942	0.507777	0.998564	2927	0.018164	0.0198005	0.359037	0.989191	2611	-0.0143827	0.0191813	0.453425	0.592544	2559	-0.0138995	0.0194889	0.475787	0.995831
Colon cancer	Cholesteryl esters to total lipids ratio in IDL	4758	0.00898855	0.0144473	0.533866	0.998564	2927	0.00655971	0.0188578	0.727977	0.989191	2611	-0.0121935	0.0179062	0.495953	0.626754	2559	-0.0186118	0.0192676	0.334154	0.995831
Colon cancer	Free cholesterol to total lipids ratio in IDL	4758	-0.00914012	0.0143463	0.524085	0.998564	2927	0.0203995	0.0189109	0.280802	0.989191	2611	-0.00911444	0.0191559	0.634254	0.744686	2559	0.0270402	0.0190531	0.155963	0.995831
Colon cancer	Phospholipids to total lipids ratio in IDL	4758	-0.00137114	0.0144663	0.924492	0.998564	2927	-0.00167518	0.0189115	0.929422	0.99785	2611	-0.0144648	0.0186712	0.43858	0.576419	2559	0.0163574	0.0199125	0.411458	0.995831
Colon cancer	Triglycerides to total lipids ratio in IDL	4758	-0.00994074	0.0144812	0.492459	0.998564	2927	-0.0216109	0.0198093	0.275385	0.989191	2611	0.0264283	0.0196009	0.177673	0.293991	2559	0.00647286	0.0192002	0.736051	0.995831
Colon cancer	Cholesterol to total lipids ratio in large HDL	4758	-0.00145227	0.0142411	0.918779	0.998564	2927	0.0129874	0.0185216	0.483232	0.989191	2611	-0.0218048	0.0193078	0.258866	0.386618	2559	0.025007	0.0185171	0.17698	0.995831
Colon cancer	Cholesteryl esters to total lipids ratio in large HDL	4758	-0.00230587	0.0142444	0.871408	0.998564	2927	0.0118441	0.0185236	0.522609	0.989191	2611	-0.0201205	0.0194731	0.301585	0.428176	2559	0.023967	0.0190448	0.208343	0.995831
Colon cancer	Free cholesterol to total lipids ratio in large HDL	4758	-0.00335525	0.0142468	0.813824	0.998564	2927	0.00523972	0.0189692	0.782397	0.989191	2611	-0.0295975	0.0192206	0.123711	0.241027	2559	0.029679	0.0181653	0.102417	0.995831
Colon cancer	Phospholipids to total lipids ratio in large HDL	4758	0.00462041	0.0143176	0.746929	0.998564	2927	-0.0139877	0.0184417	0.448224	0.989191	2611	0.0229694	0.0194587	0.237942	0.369809	2559	-0.0285106	0.0185624	0.124678	0.995831
Colon cancer	Triglycerides to total lipids ratio in large HDL	4758	-0.00184573	0.0141462	0.896196	0.998564	2927	-0.0077208	0.0188539	0.682197	0.989191	2611	0.0102951	0.0185737	0.579431	0.708879	2559	-0.00277919	0.0197907	0.888332	0.995831
Colon cancer	Cholesterol to total lipids ratio in large LDL	4758	0.00739165	0.0143781	0.607212	0.998564	2927	0.0163278	0.0189787	0.389684	0.989191	2611	0.00523828	0.0199452	0.792854	0.847333	2559	-0.0128651	0.0193409	0.505998	0.995831
Colon cancer	Cholesteryl esters to total lipids ratio in large LDL	4758	0.00681565	0.0143189	0.634103	0.998564	2927	0.0109315	0.0184255	0.553039	0.989191	2611	0.0242599	0.0195155	0.213941	0.339354	2559	-0.0086879	0.0194962	0.655909	0.995831
Colon cancer	Free cholesterol to total lipids ratio in large LDL	4758	-0.00622901	0.0143092	0.663354	0.998564	2927	0.0139351	0.0183526	0.447736	0.989191	2611	-0.0506525	0.0184654	0.00612789	0.112491	2559	0.0063321	0.0196037	0.746717	0.995831
Colon cancer	Phospholipids to total lipids ratio in large LDL	4758	0.00437603	0.0141227	0.756683	0.998564	2927	-0.00717675	0.0177718	0.686369	0.989191	2611	-0.0386879	0.0182419	0.0340304	0.209866	2559	-0.00175584	0.0200065	0.930072	0.995831
Colon cancer	Triglycerides to total lipids ratio in large LDL	4758	-0.0111071	0.0145164	0.444225	0.998564	2927	-0.0184577	0.0198538	0.352612	0.989191	2611	0.0273702	0.0195181	0.160945	0.282645	2559	0.0140639	0.0181216	0.437772	0.995831
Colon cancer	Cholesterol to total lipids ratio in large VLDL	4758	0.0202193	0.014031	0.149639	0.998564	2927	-0.022969	0.0178614	0.198558	0.989191	2611	0.00653985	0.0189728	0.730351	0.811501	2559	0.00211106	0.0193534	0.913148	0.995831
Colon cancer	Cholesteryl esters to total lipids ratio in large VLDL	4758	0.0109769	0.0143234	0.4435	0.998564	2927	-0.00987274	0.0181944	0.587428	0.989191	2611	-0.00822309	0.018833	0.662414	0.757006	2559	0.015369	0.0194143	0.428649	0.995831
Colon cancer	Free cholesterol to total lipids ratio in large VLDL	4758	0.000577541	0.0141786	0.96751	0.998564	2927	-0.0141382	0.0184388	0.443284	0.989191	2611	0.0352208	0.019058	0.0647039	0.209866	2559	-0.0107803	0.0187001	0.564342	0.995831
Colon cancer	Phospholipids to total lipids ratio in large VLDL	4758	0.000883727	0.0139683	0.949557	0.998564	2927	-0.0175408	0.0181263	0.333272	0.989191	2611	0.0365703	0.0191626	0.0564471	0.209866	2559	0.0257687	0.0195581	0.187775	0.995831
Colon cancer	Triglycerides to total lipids ratio in large VLDL	4758	-0.0171459	0.0139749	0.21992	0.998564	2927	0.0219306	0.0175358	0.211175	0.989191	2611	-0.0235185	0.0187536	0.209926	0.337643	2559	-0.00527158	0.0198662	0.790758	0.995831
Colon cancer	Cholesterol to total lipids ratio in medium HDL	4758	-0.00511489	0.0142374	0.719419	0.998564	2927	0.000225826	0.0185295	0.990277	0.99785	2611	-0.0535464	0.0179186	0.00283146	0.112491	2559	0.000570352	0.0194565	0.976616	0.995831
Colon cancer	Cholesteryl esters to total lipids ratio in medium HDL	4758	-0.0073067	0.0142453	0.608032	0.998564	2927	-0.00181216	0.0182462	0.920893	0.99785	2611	-0.0521374	0.0178183	0.00346255	0.112491	2559	-0.00589833	0.0191628	0.758259	0.995831
Colon cancer	Free cholesterol to total lipids ratio in medium HDL	4758	0.00683746	0.0144004	0.634945	0.998564	2927	0.00760311	0.019091	0.690471	0.989191	2611	-0.0340175	0.0197156	0.0845719	0.217133	2559	0.0154333	0.0183727	0.400979	0.995831
Colon cancer	Phospholipids to total lipids ratio in medium HDL	4758	0.00498679	0.0143109	0.727509	0.998564	2927	0.00840305	0.0186267	0.651929	0.989191	2611	0.0492597	0.0173952	0.00466412	0.112491	2559	0.00614071	0.0187614	0.743464	0.995831
Colon cancer	Triglycerides to total lipids ratio in medium HDL	4758	0.00125566	0.0142586	0.92983	0.998564	2927	-0.00982712	0.0186903	0.599076	0.989191	2611	0.0271481	0.0190748	0.154785	0.278129	2559	-0.00862884	0.0194294	0.657	0.995831
Colon cancer	Cholesterol to total lipids ratio in medium LDL	4758	-0.000517726	0.0143129	0.971147	0.998564	2927	0.0152109	0.0190016	0.423484	0.989191	2611	0.0104415	0.0199776	0.601255	0.720253	2559	-0.0106602	0.0192701	0.580177	0.995831
Colon cancer	Cholesteryl esters to total lipids ratio in medium LDL	4758	0.000714951	0.0143613	0.960297	0.998564	2927	0.0101776	0.0182345	0.576784	0.989191	2611	0.026549	0.0192587	0.168152	0.286936	2559	-0.00504356	0.0196277	0.79723	0.995831
Colon cancer	Free cholesterol to total lipids ratio in medium LDL	4758	-0.00198141	0.0143178	0.88994	0.998564	2927	-0.000639011	0.0174444	0.970782	0.99785	2611	-0.0473475	0.0180946	0.00893038	0.117091	2559	-0.00851785	0.0199268	0.669083	0.995831
Colon cancer	Phospholipids to total lipids ratio in medium LDL	4758	0.00332141	0.0143324	0.816748	0.998564	2927	-0.0066861	0.0179668	0.709819	0.989191	2611	-0.0305766	0.0186309	0.100881	0.226164	2559	-0.00245291	0.0198296	0.901563	0.995831
Colon cancer	Triglycerides to total lipids ratio in medium LDL	4758	-0.00642564	0.0145572	0.65894	0.998564	2927	-0.0203901	0.0190318	0.284091	0.989191	2611	0.0296832	0.018257	0.104102	0.226164	2559	0.0201332	0.0177592	0.257036	0.995831
Colon cancer	Cholesterol to total lipids ratio in medium VLDL	4758	0.0116298	0.0142	0.412827	0.998564	2927	0.000166866	0.0174787	0.992383	0.99785	2611	0.00828382	0.0182221	0.649433	0.7506	2559	0.0297376	0.0192439	0.122399	0.995831
Colon cancer	Cholesteryl esters to total lipids ratio in medium VLDL	4758	0.0110327	0.0142044	0.437366	0.998564	2927	0.00578836	0.0179489	0.747103	0.989191	2611	0.000694821	0.018473	0.969999	0.981525	2559	0.029811	0.0189464	0.11574	0.995831
Colon cancer	Free cholesterol to total lipids ratio in medium VLDL	4758	-0.000235035	0.0141545	0.986753	0.998564	2927	-0.012982	0.0184632	0.482032	0.989191	2611	0.0404684	0.0185981	0.0296495	0.209866	2559	-0.00516322	0.0195882	0.792118	0.995831
Colon cancer	Phospholipids to total lipids ratio in medium VLDL	4758	-0.0062638	0.0142947	0.661267	0.998564	2927	0.00706676	0.0177203	0.690074	0.989191	2611	0.0137257	0.0174498	0.431599	0.573802	2559	0.0278557	0.0182867	0.127814	0.995831
Colon cancer	Triglycerides to total lipids ratio in medium VLDL	4758	-0.00933031	0.0142585	0.512907	0.998564	2927	-0.00269164	0.017248	0.876001	0.99785	2611	-0.00985535	0.0180597	0.585313	0.710338	2559	-0.0226636	0.0189688	0.232284	0.995831
Colon cancer	Cholesterol to total lipids ratio in small HDL	4758	0.00977919	0.0141499	0.489529	0.998564	2927	0.00660416	0.0176021	0.707544	0.989191	2611	0.0144953	0.0164731	0.378975	0.51273	2559	-0.0137031	0.0199594	0.49243	0.995831
Colon cancer	Cholesteryl esters to total lipids ratio in small HDL	4758	0.0094701	0.0140773	0.501159	0.998564	2927	0.00555893	0.0175176	0.751013	0.989191	2611	0.0167581	0.0165134	0.310288	0.437829	2559	-0.0151504	0.0199316	0.447252	0.995831
Colon cancer	Free cholesterol to total lipids ratio in small HDL	4758	-0.00239819	0.0140747	0.864711	0.998564	2927	0.00347676	0.0180729	0.847462	0.99785	2611	-0.0237245	0.0190729	0.213652	0.339354	2559	0.0265836	0.0194128	0.170998	0.995831
Colon cancer	Phospholipids to total lipids ratio in small HDL	4758	-0.00740917	0.013998	0.596621	0.998564	2927	-0.00413122	0.0172073	0.810281	0.989191	2611	-0.0293076	0.0164071	0.0741698	0.209866	2559	0.013364	0.0199006	0.501939	0.995831
Colon cancer	Triglycerides to total lipids ratio in small HDL	4758	-0.0108839	0.0144056	0.449967	0.998564	2927	-0.00795853	0.0190035	0.675398	0.989191	2611	0.0446523	0.0195695	0.0225854	0.199794	2559	-0.00465992	0.0194409	0.810585	0.995831
Colon cancer	Cholesterol to total lipids ratio in small LDL	4758	-2.5686e-05	0.0142718	0.998564	0.998564	2927	0.013751	0.0186724	0.461525	0.989191	2611	0.0118161	0.0196267	0.547197	0.676641	2559	-0.00998225	0.0195061	0.608869	0.995831
Colon cancer	Cholesteryl esters to total lipids ratio in small LDL	4758	0.00142494	0.0143662	0.920994	0.998564	2927	0.0103267	0.0180063	0.566348	0.989191	2611	0.0247323	0.0190155	0.193498	0.313413	2559	-0.00432522	0.0198275	0.827335	0.995831
Colon cancer	Free cholesterol to total lipids ratio in small LDL	4758	-0.00157843	0.0142786	0.911982	0.998564	2927	0.00167423	0.0174456	0.923552	0.99785	2611	-0.0466542	0.0179986	0.00959257	0.117091	2559	-0.0102467	0.0199302	0.607205	0.995831
Colon cancer	Phospholipids to total lipids ratio in small LDL	4758	0.00206845	0.0143694	0.885548	0.998564	2927	-0.00708091	0.01787	0.691952	0.989191	2611	-0.0302433	0.0187122	0.106165	0.226164	2559	-0.000184098	0.0198409	0.992597	0.995831
Colon cancer	Triglycerides to total lipids ratio in small LDL	4758	-0.00320464	0.0145457	0.825635	0.998564	2927	-0.02515	0.0195946	0.199412	0.989191	2611	0.034752	0.0190488	0.0682114	0.209866	2559	0.0116333	0.0187558	0.535148	0.995831
Colon cancer	Cholesterol to total lipids ratio in small VLDL	4758	0.00164286	0.0143166	0.908646	0.998564	2927	0.0240639	0.0192039	0.210279	0.989191	2611	-0.00607627	0.0196248	0.756873	0.825027	2559	0.00838193	0.0200622	0.67613	0.995831
Colon cancer	Cholesteryl esters to total lipids ratio in small VLDL	4758	0.00183519	0.014316	0.898003	0.998564	2927	0.0246294	0.0193143	0.202344	0.989191	2611	-0.00653544	0.0196539	0.739518	0.813824	2559	0.00483804	0.0201696	0.810452	0.995831
Colon cancer	Free cholesterol to total lipids ratio in small VLDL	4758	-0.00164188	0.0142208	0.908089	0.998564	2927	0.0068344	0.0181627	0.706731	0.989191	2611	0.00425966	0.0174657	0.807338	0.851778	2559	0.00997241	0.0186858	0.593602	0.995831
Colon cancer	Phospholipids to total lipids ratio in small VLDL	4758	-0.00116624	0.0142708	0.934871	0.998564	2927	-0.000579348	0.0192459	0.975987	0.99785	2611	-0.0263054	0.0187605	0.160985	0.282645	2559	0.0152498	0.0189842	0.421884	0.995831
Colon cancer	Triglycerides to total lipids ratio in small VLDL	4758	0.000109105	0.0142839	0.993906	0.998564	2927	-0.0209079	0.0192686	0.277976	0.989191	2611	0.0151252	0.019439	0.436588	0.576419	2559	-0.0185333	0.0192593	0.335988	0.995831
Colon cancer	Ratio of diacylglycerol to triglycerides	4665	0.00859295	0.0144549	0.55223	0.998564	2822	-0.0285911	0.0189255	0.130973	0.989191	2544	0.0200867	0.0199792	0.314811	0.441503
Colon cancer	Cholesterol to total lipids ratio in very large HDL	4758	-0.00850084	0.0144247	0.555672	0.998564	2927	-0.0173464	0.0168814	0.304249	0.989191	2611	-0.00347728	0.0172479	0.84024	0.882444	2559	-0.0116796	0.0193894	0.54698	0.995831
Colon cancer	Cholesteryl esters to total lipids ratio in very large HDL	4758	-0.00696266	0.0143908	0.628532	0.998564	2927	-0.016064	0.0169024	0.341987	0.989191	2611	-0.00469069	0.017355	0.786968	0.847333	2559	-0.00775901	0.0185426	0.675659	0.995831
Colon cancer	Free cholesterol to total lipids ratio in very large HDL	4758	-0.00598914	0.0142519	0.674332	0.998564	2927	-0.0123041	0.0184256	0.504331	0.989191	2611	-0.00717967	0.019521	0.713058	0.796133	2559	0.016516	0.0184441	0.370622	0.995831
Colon cancer	Phospholipids to total lipids ratio in very large HDL	4758	0.00868871	0.0143409	0.54463	0.998564	2927	0.0156142	0.0171424	0.362449	0.989191	2611	-0.00290946	0.0172479	0.866058	0.901327	2559	0.0153518	0.0194032	0.428903	0.995831
Colon cancer	Triglycerides to total lipids ratio in very large HDL	4758	0.00288349	0.014216	0.839273	0.998564	2927	0.00312034	0.0189177	0.869	0.99785	2611	0.0280572	0.0194031	0.148293	0.270694	2559	-0.010813	0.0195222	0.579707	0.995831
Colon cancer	Cholesterol to total lipids ratio in very large VLDL	4758	0.001234	0.0143337	0.931398	0.998564	2927	0.0226973	0.0181536	0.211293	0.989191	2611	0.003309	0.018754	0.85996	0.899049	2559	0.00545201	0.0189277	0.773336	0.995831
Colon cancer	Cholesteryl esters to total lipids ratio in very large VLDL	4758	0.000594892	0.0143336	0.966896	0.998564	2927	0.0189224	0.0185937	0.308917	0.989191	2611	-0.0130431	0.0191154	0.495088	0.626754	2559	-0.000282425	0.0190191	0.988153	0.995831
Colon cancer	Free cholesterol to total lipids ratio in very large VLDL	4758	0.00368397	0.0142796	0.796427	0.998564	2927	0.0227905	0.0175815	0.194981	0.989191	2611	0.0165218	0.0180353	0.35971	0.495409	2559	0.0153364	0.0190904	0.421844	0.995831
Colon cancer	Phospholipids to total lipids ratio in very large VLDL	4758	0.00290884	0.0140646	0.836159	0.998564	2927	-0.00821034	0.0180489	0.64922	0.989191	2611	0.0396283	0.0185918	0.0331416	0.209866	2559	0.0122919	0.0195937	0.530492	0.995831
Colon cancer	Triglycerides to total lipids ratio in very large VLDL	4758	-0.00705523	0.0144421	0.625206	0.998564	2927	-0.0205741	0.0177186	0.245672	0.989191	2611	-0.0193273	0.0183666	0.292756	0.420837	2559	-0.00580688	0.0188109	0.757577	0.995831
Colon cancer	Cholesterol to total lipids ratio in very small VLDL	4758	-0.0052163	0.0143808	0.716825	0.998564	2927	0.0205684	0.0186831	0.271028	0.989191	2611	-0.0324528	0.0181508	0.0738996	0.209866	2559	-0.016026	0.0192408	0.404967	0.995831
Colon cancer	Cholesteryl esters to total lipids ratio in very small VLDL	4758	-0.00704066	0.0143953	0.624799	0.998564	2927	0.0199456	0.0182401	0.274263	0.989191	2611	-0.0323524	0.0177619	0.0686538	0.209866	2559	-0.0221406	0.0189573	0.242949	0.995831
Colon cancer	Free cholesterol to total lipids ratio in very small VLDL	4758	0.00368642	0.01437	0.797548	0.998564	2927	0.0107868	0.0189773	0.569804	0.989191	2611	-0.0222859	0.0193478	0.249485	0.37751	2559	0.0181545	0.0191664	0.343625	0.995831
Colon cancer	Phospholipids to total lipids ratio in very small VLDL	4758	0.00489292	0.0142561	0.731451	0.998564	2927	0.00727639	0.0170437	0.669466	0.989191	2611	0.0298081	0.0172977	0.0849628	0.217133	2559	0.0280332	0.0189417	0.139004	0.995831
Colon cancer	Triglycerides to total lipids ratio in very small VLDL	4758	-0.0019304	0.0143187	0.892763	0.998564	2927	-0.0229061	0.0198292	0.248115	0.989191	2611	0.0228728	0.0197466	0.24684	0.37751	2559	-0.00643937	0.0197308	0.744178	0.995831
Colon cancer	Triglycerides in HDL	4758	0.00410115	0.0142846	0.774047	0.998564	2927	-0.0054022	0.0185016	0.770318	0.989191	2611	0.0429984	0.0183634	0.0192804	0.18477	2559	0.0204788	0.018774	0.275462	0.995831
Colon cancer	Triglycerides in LDL	4758	-0.00584285	0.0142843	0.682528	0.998564	2927	-0.0108821	0.017541	0.535057	0.989191	2611	0.0494071	0.0171542	0.00400692	0.112491	2559	0.0131505	0.0186727	0.481334	0.995831
Colon cancer	Total triglycerides	4758	0.0027325	0.0142411	0.847849	0.998564	2927	-0.0195812	0.0189824	0.302371	0.989191	2611	0.0404278	0.019312	0.0364096	0.209866	2559	-0.0135624	0.0194625	0.485963	0.995831
[truncated: 1 more rows]

## Sheet: Supplementary File 1e
Supplementary File 1e: Assesment of instrument strength for MR analyses
[truncated: 7 more rows]

## Sheet: Supplementary File 1f
Supplementary File 1f: Associations of genetic liability to colorectal cancer with metabolic traits based on two-sample MR
[truncated: 3,736 more rows]

[truncated: 5 more sheets: Supplementary File 1g, Supplementary File 1h, Supplementary File 1i, Supplementary File 1j, Supplementary File 1k]
